# Supplementary material for: Microbiome Community Structure and Functional Gene Partitioning in Different Micro-Niches Within a Sporocarp-Forming Fungus
Source: Front Microbiol. 2021 Mar 30;12:629352. doi: 10.3389/fmicb.2021.629352 (PMC8042227; doi:10.3389/fmicb.2021.629352)
Supplement: Supplementary file 1 [file Data_Sheet_1.xls]

## Sheet: normalized_data
Genbank.ID	gene	species	geneCategory	subcategory1	subcategory2	lineage	P.1	P.2	P.3	C.1	C.2	C.3	H.1	H.2	H.3
296242846	beta_agarase	Thermosphaera aggregans DSM 11486	Carbon Cycling	Carbon degradation	Agar	superkingdom:Archaea;phylum:Crenarchaeota;class:Thermoprotei;order:Desulfurococcales;family:Desulfurococcaceae;genus:Thermosphaera;species:Thermosphaera aggregans;	0.847184	0.857851	0.848947	0.871875	0.824609	0.832728	0.816916	0.840652	0.854816
37222160	beta_agarase	uncultured bacterium	Carbon Cycling	Carbon degradation	Agar	superkingdom:Bacteria;	1.11601	1.06844	1.09545	1.16286	1.13986	1.15541	1.12719	1.17187	1.14332
37222161	beta_agarase	uncultured bacterium	Carbon Cycling	Carbon degradation	Agar	superkingdom:Bacteria;	0.967636	0.969569	0.984711	1.03482	0.95322	1.00914	0.985327	1.01747	1.01011
6469474	beta_agarase	Streptomyces coelicolor A3(2)	Carbon Cycling	Carbon degradation	Agar	superkingdom:Bacteria;phylum:Actinobacteria;class:Actinobacteria;order:Actinomycetales;family:Streptomycetaceae;genus:Streptomyces;species:Streptomyces coelicolor;	0.965383	0.940216	0.985381	0.925702	0.967556	0.901149	0.964428	0.839128	0.88807
298270237	beta_agarase	Bacteroides sp. D22	Carbon Cycling	Carbon degradation	Agar	superkingdom:Bacteria;phylum:Bacteroidetes;class:Bacteroidia;order:Bacteroidales;family:Bacteroidaceae;genus:Bacteroides;	0.810362	0.769246	0.8215	0.794884	0.821847	0.786941	0.794706	NA	0.824022
363581623	beta_agarase	Flavobacteriaceae bacterium HQM9	Carbon Cycling	Carbon degradation	Agar	superkingdom:Bacteria;phylum:Bacteroidetes;class:Flavobacteriia;order:Flavobacteriales;family:Flavobacteriaceae;	NA	NA	NA	0.805205	0.756084	0.789883	NA	NA	NA
363581769	beta_agarase	Flavobacteriaceae bacterium HQM9	Carbon Cycling	Carbon degradation	Agar	superkingdom:Bacteria;phylum:Bacteroidetes;class:Flavobacteriia;order:Flavobacteriales;family:Flavobacteriaceae;	0.797816	NA	0.817037	NA	0.775456	0.8212	NA	NA	NA
363579936	beta_agarase	Flavobacteriaceae bacterium HQM9	Carbon Cycling	Carbon degradation	Agar	superkingdom:Bacteria;phylum:Bacteroidetes;class:Flavobacteriia;order:Flavobacteriales;family:Flavobacteriaceae;	0.876394	0.834113	0.859418	0.897268	0.815545	0.88127	0.854122	0.876602	0.87697
319423811	beta_agarase	Cellulophaga algicola DSM 14237	Carbon Cycling	Carbon degradation	Agar	superkingdom:Bacteria;phylum:Bacteroidetes;class:Flavobacteriia;order:Flavobacteriales;family:Flavobacteriaceae;genus:Cellulophaga;species:Cellulophaga algicola;	0.847348	NA	0.837368	0.730409	0.805154	0.777409	0.796383	0.854521	0.783604
319955454	beta_agarase	Cellulophaga algicola DSM 14237	Carbon Cycling	Carbon degradation	Agar	superkingdom:Bacteria;phylum:Bacteroidetes;class:Flavobacteriia;order:Flavobacteriales;family:Flavobacteriaceae;genus:Cellulophaga;species:Cellulophaga algicola;	NA	NA	NA	NA	0.718353	0.731744	NA	0.840303	0.774301
297374674	beta_agarase	Zobellia galactanivorans	Carbon Cycling	Carbon degradation	Agar	superkingdom:Bacteria;phylum:Bacteroidetes;class:Flavobacteriia;order:Flavobacteriales;family:Flavobacteriaceae;genus:Zobellia;	0.72671	NA	0.71533	0.721239	0.771005	0.775336	NA	NA	NA
336297915	beta_agarase	Paenibacillus mucilaginosus KNP414	Carbon Cycling	Carbon degradation	Agar	superkingdom:Bacteria;phylum:Firmicutes;class:Bacilli;order:Bacillales;family:Paenibacillaceae;genus:Paenibacillus;species:Paenibacillus mucilaginosus;	0.928547	0.923782	0.950051	0.990292	0.95526	0.927759	0.958416	0.983779	0.960057
337744643	beta_agarase	Paenibacillus mucilaginosus KNP414	Carbon Cycling	Carbon degradation	Agar	superkingdom:Bacteria;phylum:Firmicutes;class:Bacilli;order:Bacillales;family:Paenibacillaceae;genus:Paenibacillus;species:Paenibacillus mucilaginosus;	1.08982	1.13599	1.14743	1.1	1.06492	1.11567	1.12959	1.11592	1.10502
337744638	beta_agarase	Paenibacillus mucilaginosus KNP414	Carbon Cycling	Carbon degradation	Agar	superkingdom:Bacteria;phylum:Firmicutes;class:Bacilli;order:Bacillales;family:Paenibacillaceae;genus:Paenibacillus;species:Paenibacillus mucilaginosus;	0.920796	0.882686	0.921198	0.960694	0.891708	0.983396	0.919938	0.933864	1.01541
332981903	beta_agarase	Mahella australiensis 50-1 BON	Carbon Cycling	Carbon degradation	Agar	superkingdom:Bacteria;phylum:Firmicutes;class:Clostridia;order:Thermoanaerobacterales;family:Thermoanaerobacterales Family IV. Incertae Sedis;genus:Mahella;species:Mahella australiensis;	0.768044	NA	0.7842	0.73442	NA	0.761126	0.774517	NA	0.741299
281317833	beta_agarase	Victivallis vadensis ATCC BAA-548	Carbon Cycling	Carbon degradation	Agar	superkingdom:Bacteria;phylum:Lentisphaerae;class:Lentisphaeria;family:Victivallaceae;genus:Victivallis;species:Victivallis vadensis;	0.956154	0.958286	1.02015	0.912397	0.933485	0.942596	0.933942	0.952759	0.910985
90426095	beta_agarase	Rhodopseudomonas palustris BisB18	Carbon Cycling	Carbon degradation	Agar	superkingdom:Bacteria;phylum:Proteobacteria;class:Alphaproteobacteria;order:Rhizobiales;family:Bradyrhizobiaceae;genus:Rhodopseudomonas;species:Rhodopseudomonas palustris;	1.17966	1.13829	1.12352	1.12052	1.16313	1.17973	1.10627	1.07424	1.04959
115526609	beta_agarase	Rhodopseudomonas palustris BisA53	Carbon Cycling	Carbon degradation	Agar	superkingdom:Bacteria;phylum:Proteobacteria;class:Alphaproteobacteria;order:Rhizobiales;family:Bradyrhizobiaceae;genus:Rhodopseudomonas;species:Rhodopseudomonas palustris;	1.03565	0.997195	0.99593	0.968857	1.04712	1.01892	1.03197	0.965926	1.03807
86573174	beta_agarase	Rhodopseudomonas palustris HaA2	Carbon Cycling	Carbon degradation	Agar	superkingdom:Bacteria;phylum:Proteobacteria;class:Alphaproteobacteria;order:Rhizobiales;family:Bradyrhizobiaceae;genus:Rhodopseudomonas;species:Rhodopseudomonas palustris;	0.977124	1.00543	1.00323	1.042	0.952574	0.98812	0.964757	1.01829	1.00047
91683347	beta_agarase	Rhodopseudomonas palustris BisB5	Carbon Cycling	Carbon degradation	Agar	superkingdom:Bacteria;phylum:Proteobacteria;class:Alphaproteobacteria;order:Rhizobiales;family:Bradyrhizobiaceae;genus:Rhodopseudomonas;species:Rhodopseudomonas palustris;	1.08189	1.05704	1.04256	1.03863	1.04136	1.09982	1.0509	1.08717	1.07034
6073784	beta_agarase	Aeromonas sp.	Carbon Cycling	Carbon degradation	Agar	superkingdom:Bacteria;phylum:Proteobacteria;class:Gammaproteobacteria;order:Aeromonadales;family:Aeromonadaceae;genus:Aeromonas;	0.792673	0.783278	0.771508	0.835975	0.826732	0.80913	0.778987	0.837405	0.791696
222431091	beta_agarase	Agarivorans sp. LQ48	Carbon Cycling	Carbon degradation	Agar	superkingdom:Bacteria;phylum:Proteobacteria;class:Gammaproteobacteria;order:Alteromonadales;family:Alteromonadaceae;genus:Agarivorans;	0.827962	0.803814	0.796801	0.790905	0.796291	0.853138	0.827187	NA	0.81566
110225195	beta_agarase	Alteromonas sp. E-1	Carbon Cycling	Carbon degradation	Agar	superkingdom:Bacteria;phylum:Proteobacteria;class:Gammaproteobacteria;order:Alteromonadales;family:Alteromonadaceae;genus:Alteromonas;	1.19063	1.17772	1.17705	1.26225	1.21734	1.25142	1.16194	1.21108	1.17658
332307308	beta_agarase	Glaciecola sp. 4H-3-7+YE-5	Carbon Cycling	Carbon degradation	Agar	superkingdom:Bacteria;phylum:Proteobacteria;class:Gammaproteobacteria;order:Alteromonadales;family:Alteromonadaceae;genus:Glaciecola;	0.880005	0.870819	0.868756	0.897493	0.863328	0.903902	0.85463	0.850939	0.83296
332306007	beta_agarase	Glaciecola sp. 4H-3-7+YE-5	Carbon Cycling	Carbon degradation	Agar	superkingdom:Bacteria;phylum:Proteobacteria;class:Gammaproteobacteria;order:Alteromonadales;family:Alteromonadaceae;genus:Glaciecola;	NA	NA	NA	NA	NA	NA	0.765156	0.802476	NA
332306701	beta_agarase	Glaciecola sp. 4H-3-7+YE-5	Carbon Cycling	Carbon degradation	Agar	superkingdom:Bacteria;phylum:Proteobacteria;class:Gammaproteobacteria;order:Alteromonadales;family:Alteromonadaceae;genus:Glaciecola;	0.889826	0.875416	0.873968	0.98829	0.93352	0.945843	0.872038	0.950268	0.917901
332173334	beta_agarase	Glaciecola sp. 4H-3-7+YE-5	Carbon Cycling	Carbon degradation	Agar	superkingdom:Bacteria;phylum:Proteobacteria;class:Gammaproteobacteria;order:Alteromonadales;family:Alteromonadaceae;genus:Glaciecola;	1.07148	1.10746	1.06243	1.14043	1.09199	1.1144	1.08112	1.13621	1.10701
332173515	beta_agarase	Glaciecola sp. 4H-3-7+YE-5	Carbon Cycling	Carbon degradation	Agar	superkingdom:Bacteria;phylum:Proteobacteria;class:Gammaproteobacteria;order:Alteromonadales;family:Alteromonadaceae;genus:Glaciecola;	0.804727	0.769902	NA	0.707822	NA	0.736543	NA	NA	NA
327165124	beta_agarase	Microbulbifer thermotolerans	Carbon Cycling	Carbon degradation	Agar	superkingdom:Bacteria;phylum:Proteobacteria;class:Gammaproteobacteria;order:Alteromonadales;family:Alteromonadaceae;genus:Microbulbifer;	0.85157	0.837489	0.865805	0.831335	0.892365	0.863293	0.820218	NA	0.868695
37665541	beta_agarase	Microbulbifer elongatus	Carbon Cycling	Carbon degradation	Agar	superkingdom:Bacteria;phylum:Proteobacteria;class:Gammaproteobacteria;order:Alteromonadales;family:Alteromonadaceae;genus:Microbulbifer;	1.05068	0.973834	0.826025	1.03463	0.983268	1.05107	1.01221	0.846965	1.04886
57864209	beta_agarase	Microbulbifer thermotolerans	Carbon Cycling	Carbon degradation	Agar	superkingdom:Bacteria;phylum:Proteobacteria;class:Gammaproteobacteria;order:Alteromonadales;family:Alteromonadaceae;genus:Microbulbifer;	1.13647	1.17259	1.16341	1.24625	1.13587	1.10726	1.16532	1.18751	1.20414
372268833	beta_agarase	Alteromonas sp. S89	Carbon Cycling	Carbon degradation	Agar	superkingdom:Bacteria;phylum:Proteobacteria;class:Gammaproteobacteria;order:Alteromonadales;family:Alteromonadaceae;genus:Microbulbifer;species:Microbulbifer agarilyticus;	1.33048	1.30419	1.39912	1.26351	1.43096	1.30703	1.30191	1.33962	1.3687
90022295	beta_agarase	Saccharophagus degradans 2-40	Carbon Cycling	Carbon degradation	Agar	superkingdom:Bacteria;phylum:Proteobacteria;class:Gammaproteobacteria;order:Alteromonadales;family:Alteromonadaceae;genus:Saccharophagus;species:Saccharophagus degradans;	0.851092	0.860506	0.875759	0.867813	0.793969	0.841925	0.812508	0.827774	0.88618
90020822	beta_agarase	Saccharophagus degradans 2-40	Carbon Cycling	Carbon degradation	Agar	superkingdom:Bacteria;phylum:Proteobacteria;class:Gammaproteobacteria;order:Alteromonadales;family:Alteromonadaceae;genus:Saccharophagus;species:Saccharophagus degradans;	0.872176	0.843796	0.858061	0.892965	0.889138	0.857792	0.894249	0.828087	0.909473
49615787	beta_agarase	Saccharophagus degradans 2-40	Carbon Cycling	Carbon degradation	Agar	superkingdom:Bacteria;phylum:Proteobacteria;class:Gammaproteobacteria;order:Alteromonadales;family:Alteromonadaceae;genus:Saccharophagus;species:Saccharophagus degradans;	NA	NA	NA	NA	0.760725	0.792421	NA	NA	NA
194294277	beta_agarase	Pseudoalteromonas sp. JT-6	Carbon Cycling	Carbon degradation	Agar	superkingdom:Bacteria;phylum:Proteobacteria;class:Gammaproteobacteria;order:Alteromonadales;family:Pseudoalteromonadaceae;genus:Pseudoalteromonas;	0.852925	0.815327	0.874407	0.851171	0.941591	0.868961	0.813586	NA	0.875601
109700938	beta_agarase	Pseudoalteromonas atlantica T6c	Carbon Cycling	Carbon degradation	Agar	superkingdom:Bacteria;phylum:Proteobacteria;class:Gammaproteobacteria;order:Alteromonadales;family:Pseudoalteromonadaceae;genus:Pseudoalteromonas;species:Pseudoalteromonas atlantica;	0.876313	NA	0.878087	0.701589	0.925282	0.776323	NA	0.828665	0.932448
190569835	beta_agarase	Cellvibrio sp. OA-2007	Carbon Cycling	Carbon degradation	Agar	superkingdom:Bacteria;phylum:Proteobacteria;class:Gammaproteobacteria;order:Pseudomonadales;family:Pseudomonadaceae;genus:Cellvibrio;	0.913455	0.861105	0.892608	0.984218	1.0144	1.07467	0.911942	0.914838	1.08965
58219335	beta_agarase	Pseudomonas sp. ND137	Carbon Cycling	Carbon degradation	Agar	superkingdom:Bacteria;phylum:Proteobacteria;class:Gammaproteobacteria;order:Pseudomonadales;family:Pseudomonadaceae;genus:Pseudomonas;	1.03423	0.87083	0.875603	0.996214	0.958514	1.02568	1.01047	0.844541	1.04165
333116788	beta_agarase	Pseudomonas fulva 12-X	Carbon Cycling	Carbon degradation	Agar	superkingdom:Bacteria;phylum:Proteobacteria;class:Gammaproteobacteria;order:Pseudomonadales;family:Pseudomonadaceae;genus:Pseudomonas;species:Pseudomonas fulva;	1.05887	1.032	1.05761	1.14337	1.10306	1.11923	1.05644	1.13381	1.06817
115551736	beta_agarase	Vibrio sp. PO-303	Carbon Cycling	Carbon degradation	Agar	superkingdom:Bacteria;phylum:Proteobacteria;class:Gammaproteobacteria;order:Vibrionales;family:Vibrionaceae;genus:Vibrio;	1.12545	1.08169	1.01706	1.07537	1.18138	1.07601	1.09675	0.962444	1.16254
146424725	beta_agarase	Vibrio sp. PO-303	Carbon Cycling	Carbon degradation	Agar	superkingdom:Bacteria;phylum:Proteobacteria;class:Gammaproteobacteria;order:Vibrionales;family:Vibrionaceae;genus:Vibrio;	0.841615	NA	0.800053	NA	NA	NA	NA	NA	NA
372474454	beta_agarase	Opitutaceae bacterium TAV5	Carbon Cycling	Carbon degradation	Agar	superkingdom:Bacteria;phylum:Verrucomicrobia;class:Opitutae;family:Opitutaceae;	1.10067	1.07928	1.10811	1.20677	1.14486	1.13856	1.1225	1.17763	1.15018
373855010	beta_agarase	Opitutaceae bacterium TAV5	Carbon Cycling	Carbon degradation	Agar	superkingdom:Bacteria;phylum:Verrucomicrobia;class:Opitutae;family:Opitutaceae;	0.92062	0.884162	0.904352	0.943359	0.896032	0.94291	0.914554	0.918099	0.926145
372471984	beta_agarase	Opitutaceae bacterium TAV5	Carbon Cycling	Carbon degradation	Agar	superkingdom:Bacteria;phylum:Verrucomicrobia;class:Opitutae;family:Opitutaceae;	0.947555	0.932617	0.962335	1.01414	0.985572	0.97359	0.989497	1.0094	0.982693
372476103	beta_agarase	Opitutaceae bacterium TAV5	Carbon Cycling	Carbon degradation	Agar	superkingdom:Bacteria;phylum:Verrucomicrobia;class:Opitutae;family:Opitutaceae;	1.05994	1.0877	1.08595	1.11631	1.10197	1.09109	1.1245	1.1295	1.0823
372471993	beta_agarase	Opitutaceae bacterium TAV5	Carbon Cycling	Carbon degradation	Agar	superkingdom:Bacteria;phylum:Verrucomicrobia;class:Opitutae;family:Opitutaceae;	0.988374	1.00714	1.01619	0.960617	1.06112	0.96899	1.01665	1.03819	1.02672
294054147	beta_agarase	Coraliomargarita akajimensis DSM 45221	Carbon Cycling	Carbon degradation	Agar	superkingdom:Bacteria;phylum:Verrucomicrobia;class:Opitutae;order:Puniceicoccales;family:Puniceicoccaceae;genus:Coraliomargarita;species:Coraliomargarita akajimensis;	1.18335	1.04918	1.02617	0.99268	1.14137	1.22282	1.07552	0.974195	1.09475
294053901	beta_agarase	Coraliomargarita akajimensis DSM 45221	Carbon Cycling	Carbon degradation	Agar	superkingdom:Bacteria;phylum:Verrucomicrobia;class:Opitutae;order:Puniceicoccales;family:Puniceicoccaceae;genus:Coraliomargarita;species:Coraliomargarita akajimensis;	NA	NA	NA	0.686047	0.815298	0.796166	NA	NA	NA
293613346	beta_agarase	Coraliomargarita akajimensis DSM 45221	Carbon Cycling	Carbon degradation	Agar	superkingdom:Bacteria;phylum:Verrucomicrobia;class:Opitutae;order:Puniceicoccales;family:Puniceicoccaceae;genus:Coraliomargarita;species:Coraliomargarita akajimensis;	0.87425	0.831836	0.855444	0.819535	0.801172	0.882838	0.762699	0.871801	0.77876
293613423	beta_agarase	Coraliomargarita akajimensis DSM 45221	Carbon Cycling	Carbon degradation	Agar	superkingdom:Bacteria;phylum:Verrucomicrobia;class:Opitutae;order:Puniceicoccales;family:Puniceicoccaceae;genus:Coraliomargarita;species:Coraliomargarita akajimensis;	0.986565	1.05881	1.06181	1.18837	1.015	0.97503	1.02726	1.10446	1.06675
294053913	beta_agarase	Coraliomargarita akajimensis DSM 45221	Carbon Cycling	Carbon degradation	Agar	superkingdom:Bacteria;phylum:Verrucomicrobia;class:Opitutae;order:Puniceicoccales;family:Puniceicoccaceae;genus:Coraliomargarita;species:Coraliomargarita akajimensis;	NA	NA	NA	NA	0.78641	0.747136	NA	NA	NA
293613862	beta_agarase	Coraliomargarita akajimensis DSM 45221	Carbon Cycling	Carbon degradation	Agar	superkingdom:Bacteria;phylum:Verrucomicrobia;class:Opitutae;order:Puniceicoccales;family:Puniceicoccaceae;genus:Coraliomargarita;species:Coraliomargarita akajimensis;	0.911691	0.996997	1.03505	0.897531	1.08532	0.914471	0.983581	0.995254	1.05856
293613363	beta_agarase	Coraliomargarita akajimensis DSM 45221	Carbon Cycling	Carbon degradation	Agar	superkingdom:Bacteria;phylum:Verrucomicrobia;class:Opitutae;order:Puniceicoccales;family:Puniceicoccaceae;genus:Coraliomargarita;species:Coraliomargarita akajimensis;	1.09166	1.11797	1.14081	1.05236	1.16293	0.98856	1.13478	1.13973	1.09716
229611308	alginase	uncultured bacterium	Carbon Cycling	Carbon degradation	Alginate	superkingdom:Bacteria;	NA	NA	NA	NA	NA	NA	0.792075	0.780121	NA
322437661	alginase	Granulicella tundricola	Carbon Cycling	Carbon degradation	Alginate	superkingdom:Bacteria;phylum:Acidobacteria;class:Acidobacteriia;order:Acidobacteriales;family:Acidobacteriaceae;genus:Granulicella;	1.12137	1.09773	0.975805	1.03805	1.05135	1.12421	1.09416	0.910594	1.15035
374311499	alginase	Granulicella mallensis MP5ACTX8	Carbon Cycling	Carbon degradation	Alginate	superkingdom:Bacteria;phylum:Acidobacteria;class:Acidobacteriia;order:Acidobacteriales;family:Acidobacteriaceae;genus:Granulicella;species:Granulicella mallensis;	0.956698	0.939071	0.958822	0.992808	0.976622	0.970413	0.957007	0.862019	0.986006
320105575	alginase	Terriglobus saanensis SP1PR4	Carbon Cycling	Carbon degradation	Alginate	superkingdom:Bacteria;phylum:Acidobacteria;class:Acidobacteriia;order:Acidobacteriales;family:Acidobacteriaceae;genus:Terriglobus;species:Terriglobus saanensis;	1.05903	1.11733	1.09169	1.07955	1.03256	1.08791	1.06436	1.04048	1.05908
320105503	alginase	Terriglobus saanensis SP1PR4	Carbon Cycling	Carbon degradation	Alginate	superkingdom:Bacteria;phylum:Acidobacteria;class:Acidobacteriia;order:Acidobacteriales;family:Acidobacteriaceae;genus:Terriglobus;species:Terriglobus saanensis;	1.31958	1.30337	1.12177	1.25818	1.23132	1.29095	1.32001	1.05197	1.36
320106025	alginase	Terriglobus saanensis SP1PR4	Carbon Cycling	Carbon degradation	Alginate	superkingdom:Bacteria;phylum:Acidobacteria;class:Acidobacteriia;order:Acidobacteriales;family:Acidobacteriaceae;genus:Terriglobus;species:Terriglobus saanensis;	1.14592	1.12494	1.16768	1.09642	1.11623	1.1256	1.12273	1.10447	1.11487
116225255	alginase	Candidatus Solibacter usitatus Ellin6076	Carbon Cycling	Carbon degradation	Alginate	superkingdom:Bacteria;phylum:Acidobacteria;class:Solibacteres;order:Solibacterales;family:Solibacteraceae;genus:Candidatus Solibacter;species:Candidatus Solibacter usitatus;	1.12721	1.12059	1.11982	1.14808	1.07948	1.17722	1.13094	1.05794	1.11744
116623620	alginase	Candidatus Solibacter usitatus Ellin6076	Carbon Cycling	Carbon degradation	Alginate	superkingdom:Bacteria;phylum:Acidobacteria;class:Solibacteres;order:Solibacterales;family:Solibacteraceae;genus:Candidatus Solibacter;species:Candidatus Solibacter usitatus;	1.22546	1.19575	1.25772	1.18627	1.23032	1.20046	1.17296	1.21448	1.19077
256362819	alginase	Catenulispora acidiphila DSM 44928	Carbon Cycling	Carbon degradation	Alginate	superkingdom:Bacteria;phylum:Actinobacteria;class:Actinobacteria;order:Actinomycetales;family:Catenulisporaceae;genus:Catenulispora;species:Catenulispora acidiphila;	1.0369	1.05239	1.06311	1.17719	1.08825	1.0911	1.05545	1.1463	1.08355
256360532	alginase	Catenulispora acidiphila DSM 44928	Carbon Cycling	Carbon degradation	Alginate	superkingdom:Bacteria;phylum:Actinobacteria;class:Actinobacteria;order:Actinomycetales;family:Catenulisporaceae;genus:Catenulispora;species:Catenulispora acidiphila;	1.08433	1.03371	1.05422	1.08498	1.03628	1.12081	1.02507	1.06706	0.98184
256357030	alginase	Catenulispora acidiphila DSM 44928	Carbon Cycling	Carbon degradation	Alginate	superkingdom:Bacteria;phylum:Actinobacteria;class:Actinobacteria;order:Actinomycetales;family:Catenulisporaceae;genus:Catenulispora;species:Catenulispora acidiphila;	1.1592	1.17163	1.1335	1.30818	1.20806	1.20047	1.18013	1.27331	1.22266
5732185	alginase	Corynebacterium sp. ALY-1	Carbon Cycling	Carbon degradation	Alginate	superkingdom:Bacteria;phylum:Actinobacteria;class:Actinobacteria;order:Actinomycetales;family:Corynebacteriaceae;genus:Corynebacterium;	1.22329	1.26187	1.21578	1.26632	1.12935	1.25102	1.20498	1.19505	1.21875
312194055	alginase	Frankia sp. EuI1c	Carbon Cycling	Carbon degradation	Alginate	superkingdom:Bacteria;phylum:Actinobacteria;class:Actinobacteria;order:Actinomycetales;family:Frankiaceae;genus:Frankia;	1.01224	0.979486	1.05768	1.01905	1.08112	0.959527	1.01047	1.02954	1.04085
290570037	alginase	Stackebrandtia nassauensis DSM 44728	Carbon Cycling	Carbon degradation	Alginate	superkingdom:Bacteria;phylum:Actinobacteria;class:Actinobacteria;order:Actinomycetales;family:Glycomycetaceae;genus:Stackebrandtia;species:Stackebrandtia nassauensis;	0.932887	0.832801	0.847855	0.842647	0.853519	0.949512	0.870686	NA	0.883592
284029470	alginase	Kribbella flavida DSM 17836	Carbon Cycling	Carbon degradation	Alginate	superkingdom:Bacteria;phylum:Actinobacteria;class:Actinobacteria;order:Actinomycetales;family:Nocardioidaceae;genus:Kribbella;species:Kribbella flavida;	1.18641	1.10827	1.16046	1.19605	1.23302	1.23757	1.1478	1.1294	1.22829
224566899	alginase	Streptomyces sp. M3(2009)	Carbon Cycling	Carbon degradation	Alginate	superkingdom:Bacteria;phylum:Actinobacteria;class:Actinobacteria;order:Actinomycetales;family:Streptomycetaceae;genus:Streptomyces;	1.12968	1.0384	1.02996	1.07444	1.03758	1.17769	1.13904	0.846084	1.07489
29604442	alginase	Streptomyces avermitilis MA-4680	Carbon Cycling	Carbon degradation	Alginate	superkingdom:Bacteria;phylum:Actinobacteria;class:Actinobacteria;order:Actinomycetales;family:Streptomycetaceae;genus:Streptomyces;species:Streptomyces avermitilis;	1.31418	1.30194	1.3223	1.41058	1.35159	1.35568	1.30417	1.35894	1.32701
374984358	alginase	Streptomyces bingchenggensis BCW-1	Carbon Cycling	Carbon degradation	Alginate	superkingdom:Bacteria;phylum:Actinobacteria;class:Actinobacteria;order:Actinomycetales;family:Streptomycetaceae;genus:Streptomyces;species:Streptomyces bingchenggensis;	0.956925	0.958495	0.958464	0.937342	0.884889	0.959585	0.921361	0.942904	0.921413
326440094	alginase	Streptomyces clavuligerus ATCC 27064	Carbon Cycling	Carbon degradation	Alginate	superkingdom:Bacteria;phylum:Actinobacteria;class:Actinobacteria;order:Actinomycetales;family:Streptomycetaceae;genus:Streptomyces;species:Streptomyces clavuligerus;	0.921595	0.908798	0.893404	0.947177	0.842441	0.940581	0.886865	0.909726	0.922351
297197274	alginase	Streptomyces sviceus ATCC 29083	Carbon Cycling	Carbon degradation	Alginate	superkingdom:Bacteria;phylum:Actinobacteria;class:Actinobacteria;order:Actinomycetales;family:Streptomycetaceae;genus:Streptomyces;species:Streptomyces sviceus;	1.18001	1.16527	1.18169	1.16712	1.12157	1.17575	1.12182	1.15125	1.19764
344038773	alginase	Streptomyces violaceusniger Tu 4113	Carbon Cycling	Carbon degradation	Alginate	superkingdom:Bacteria;phylum:Actinobacteria;class:Actinobacteria;order:Actinomycetales;family:Streptomycetaceae;genus:Streptomyces;species:Streptomyces violaceusniger;	1.24545	1.1955	1.2827	1.18581	1.31436	1.31533	1.33889	1.1866	1.44593
345014868	alginase	Streptomyces violaceusniger Tu 4113	Carbon Cycling	Carbon degradation	Alginate	superkingdom:Bacteria;phylum:Actinobacteria;class:Actinobacteria;order:Actinomycetales;family:Streptomycetaceae;genus:Streptomyces;species:Streptomyces violaceusniger;	1.11931	1.0887	1.10591	1.08102	1.15852	1.10359	1.11238	0.986958	1.14866
329960685	alginase	Bacteroides fluxus YIT 12057	Carbon Cycling	Carbon degradation	Alginate	superkingdom:Bacteria;phylum:Bacteroidetes;class:Bacteroidia;order:Bacteroidales;family:Bacteroidaceae;genus:Bacteroides;species:Bacteroides fluxus;	0.916829	0.948738	0.940645	1.02894	0.958071	0.974794	0.920329	1.00757	0.962169
156110776	alginase	Bacteroides ovatus ATCC 8483	Carbon Cycling	Carbon degradation	Alginate	superkingdom:Bacteria;phylum:Bacteroidetes;class:Bacteroidia;order:Bacteroidales;family:Bacteroidaceae;genus:Bacteroides;species:Bacteroides ovatus;	NA	NA	NA	NA	0.774556	0.777611	NA	NA	NA
160883696	alginase	Bacteroides ovatus ATCC 8483	Carbon Cycling	Carbon degradation	Alginate	superkingdom:Bacteria;phylum:Bacteroidetes;class:Bacteroidia;order:Bacteroidales;family:Bacteroidaceae;genus:Bacteroides;species:Bacteroides ovatus;	0.872056	0.872121	0.868997	0.951375	0.907866	0.904038	0.888098	0.919904	0.902921
343086475	alginase	Cyclobacterium marinum DSM 745	Carbon Cycling	Carbon degradation	Alginate	superkingdom:Bacteria;phylum:Bacteroidetes;class:Cytophagia;order:Cytophagales;family:Cyclobacteriaceae;genus:Cyclobacterium;species:Cyclobacterium marinum;	0.758683	0.799027	0.763518	0.838066	0.74334	0.809855	NA	NA	NA
312130581	alginase	Leadbetterella byssophila DSM 17132	Carbon Cycling	Carbon degradation	Alginate	superkingdom:Bacteria;phylum:Bacteroidetes;class:Cytophagia;order:Cytophagales;family:Cytophagaceae;genus:Leadbetterella;species:Leadbetterella byssophila;	0.941727	0.958319	0.951848	0.975456	0.87969	0.952735	0.931216	0.891132	0.959939
283818855	alginase	Spirosoma linguale DSM 74	Carbon Cycling	Carbon degradation	Alginate	superkingdom:Bacteria;phylum:Bacteroidetes;class:Cytophagia;order:Cytophagales;family:Cytophagaceae;genus:Spirosoma;species:Spirosoma linguale;	0.852275	0.862011	0.851528	0.941742	0.890886	0.877157	0.87947	0.940535	0.876906
283814783	alginase	Spirosoma linguale DSM 74	Carbon Cycling	Carbon degradation	Alginate	superkingdom:Bacteria;phylum:Bacteroidetes;class:Cytophagia;order:Cytophagales;family:Cytophagaceae;genus:Spirosoma;species:Spirosoma linguale;	0.808172	0.871215	0.823005	0.981073	0.819529	0.87684	0.819397	0.940964	0.883176
319954424	alginase	Cellulophaga algicola DSM 14237	Carbon Cycling	Carbon degradation	Alginate	superkingdom:Bacteria;phylum:Bacteroidetes;class:Flavobacteriia;order:Flavobacteriales;family:Flavobacteriaceae;genus:Cellulophaga;species:Cellulophaga algicola;	0.777133	0.799912	0.803722	0.85055	0.746784	0.855131	0.76854	0.849839	0.818646
120435511	alginase	Gramella forsetii KT0803	Carbon Cycling	Carbon degradation	Alginate	superkingdom:Bacteria;phylum:Bacteroidetes;class:Flavobacteriia;order:Flavobacteriales;family:Flavobacteriaceae;genus:Gramella;species:Gramella forsetii;	0.824629	NA	0.806741	NA	NA	NA	0.781582	0.776184	0.75316
256423518	alginase	Chitinophaga pinensis DSM 2588	Carbon Cycling	Carbon degradation	Alginate	superkingdom:Bacteria;phylum:Bacteroidetes;class:Sphingobacteriia;order:Sphingobacteriales;genus:Chitinophaga;species:Chitinophaga pinensis;	NA	NA	NA	NA	0.779142	0.753348	NA	NA	NA
375148419	alginase	Niastella koreensis GR20-10	Carbon Cycling	Carbon degradation	Alginate	superkingdom:Bacteria;phylum:Bacteroidetes;class:Sphingobacteriia;order:Sphingobacteriales;genus:Niastella;species:Niastella koreensis;	0.886982	0.838878	0.855099	0.886141	0.895623	0.883915	0.870714	0.784208	0.91879
361062625	alginase	Niastella koreensis GR20-10	Carbon Cycling	Carbon degradation	Alginate	superkingdom:Bacteria;phylum:Bacteroidetes;class:Sphingobacteriia;order:Sphingobacteriales;genus:Niastella;species:Niastella koreensis;	NA	NA	NA	0.718219	0.817268	0.753284	NA	NA	NA
262334258	alginase	Rhodothermus marinus DSM 4252	Carbon Cycling	Carbon degradation	Alginate	superkingdom:Bacteria;phylum:Bacteroidetes;order:Bacteroidetes Order II. Incertae sedis;family:Rhodothermaceae;genus:Rhodothermus;species:Rhodothermus marinus;	0.855111	0.888164	0.880494	NA	0.833214	0.874422	0.873821	0.9497	0.902228
194311474	alginase	Prosthecochloris aestuarii DSM 271	Carbon Cycling	Carbon degradation	Alginate	superkingdom:Bacteria;phylum:Chlorobi;class:Chlorobia;order:Chlorobiales;family:Chlorobiaceae;genus:Prosthecochloris;species:Prosthecochloris aestuarii;	0.87052	0.89453	0.960004	0.823798	0.874614	0.872972	0.854195	0.897196	0.890621
261285605	alginase	Paenibacillus sp. Y412MC10	Carbon Cycling	Carbon degradation	Alginate	superkingdom:Bacteria;phylum:Firmicutes;class:Bacilli;order:Bacillales;family:Paenibacillaceae;genus:Paenibacillus;	1.12388	1.17459	1.16881	1.30665	1.17044	1.18866	1.12832	1.22277	1.18905
337745243	alginase	Paenibacillus mucilaginosus KNP414	Carbon Cycling	Carbon degradation	Alginate	superkingdom:Bacteria;phylum:Firmicutes;class:Bacilli;order:Bacillales;family:Paenibacillaceae;genus:Paenibacillus;species:Paenibacillus mucilaginosus;	0.838844	0.838905	0.848093	0.865579	0.852922	0.875425	0.824825	0.797962	0.878326
355672893	alginase	Clostridium citroniae WAL-17108	Carbon Cycling	Carbon degradation	Alginate	superkingdom:Bacteria;phylum:Firmicutes;class:Clostridia;order:Clostridiales;family:Clostridiaceae;genus:Clostridium;species:Clostridium citroniae;	0.932978	0.94362	0.906672	0.895646	1.04331	0.977333	0.982535	0.966008	0.862588
32472610	alginase	Rhodopirellula baltica SH 1	Carbon Cycling	Carbon degradation	Alginate	superkingdom:Bacteria;phylum:Planctomycetes;class:Planctomycetia;order:Planctomycetales;family:Planctomycetaceae;genus:Rhodopirellula;species:Rhodopirellula baltica;	1.05441	0.969686	0.986407	0.986698	1.00159	1.08746	1.04414	0.805826	1.04204
329851654	alginase	Asticcacaulis biprosthecum C19	Carbon Cycling	Carbon degradation	Alginate	superkingdom:Bacteria;phylum:Proteobacteria;class:Alphaproteobacteria;order:Caulobacterales;family:Caulobacteraceae;genus:Asticcacaulis;species:Asticcacaulis biprosthecium;	1.15157	1.15869	1.16142	1.21317	1.13024	1.1711	1.13987	1.12723	1.17311
329851655	alginase	Asticcacaulis biprosthecum C19	Carbon Cycling	Carbon degradation	Alginate	superkingdom:Bacteria;phylum:Proteobacteria;class:Alphaproteobacteria;order:Caulobacterales;family:Caulobacteraceae;genus:Asticcacaulis;species:Asticcacaulis biprosthecium;	1.12289	1.12247	1.1505	1.13408	1.12863	1.17061	1.12107	1.13873	1.18226
329851663	alginase	Asticcacaulis biprosthecum C19	Carbon Cycling	Carbon degradation	Alginate	superkingdom:Bacteria;phylum:Proteobacteria;class:Alphaproteobacteria;order:Caulobacterales;family:Caulobacteraceae;genus:Asticcacaulis;species:Asticcacaulis biprosthecium;	0.984701	0.869759	1.00606	0.910364	1.0749	1.00381	0.94612	0.937487	0.986453
315500531	alginase	Asticcacaulis excentricus CB 48	Carbon Cycling	Carbon degradation	Alginate	superkingdom:Bacteria;phylum:Proteobacteria;class:Alphaproteobacteria;order:Caulobacterales;family:Caulobacteraceae;genus:Asticcacaulis;species:Asticcacaulis excentricus;	0.874647	0.912929	0.903962	0.909739	0.858738	0.907336	0.874218	0.94695	0.917959
219950314	alginase	Methylobacterium nodulans ORS 2060	Carbon Cycling	Carbon degradation	Alginate	superkingdom:Bacteria;phylum:Proteobacteria;class:Alphaproteobacteria;order:Rhizobiales;family:Methylobacteriaceae;genus:Methylobacterium;species:Methylobacterium nodulans;	1.09238	1.11342	1.10277	1.22113	1.10817	1.1427	1.06576	1.13835	1.14695
332715725	alginase	Agrobacterium sp. H13-3	Carbon Cycling	Carbon degradation	Alginate	superkingdom:Bacteria;phylum:Proteobacteria;class:Alphaproteobacteria;order:Rhizobiales;family:Rhizobiaceae;genus:Agrobacterium;	0.992754	0.922776	0.94451	0.847261	0.997094	0.968831	0.910894	0.858644	0.901553
15160399	alginase	Agrobacterium tumefaciens str. C58	Carbon Cycling	Carbon degradation	Alginate	superkingdom:Bacteria;phylum:Proteobacteria;class:Alphaproteobacteria;order:Rhizobiales;family:Rhizobiaceae;genus:Agrobacterium;species:Agrobacterium fabrum;	1.39864	1.41806	1.40626	1.47915	1.40169	1.43687	1.39996	1.41924	1.45148
338821542	alginase	Agrobacterium tumefaciens F2	Carbon Cycling	Carbon degradation	Alginate	superkingdom:Bacteria;phylum:Proteobacteria;class:Alphaproteobacteria;order:Rhizobiales;family:Rhizobiaceae;genus:Agrobacterium;species:Agrobacterium tumefaciens;	1.1076	1.08479	1.10173	1.10841	1.14258	1.10142	1.12049	0.932168	1.15125
375054882	alginase	Rhizobium sp. PDO-076	Carbon Cycling	Carbon degradation	Alginate	superkingdom:Bacteria;phylum:Proteobacteria;class:Alphaproteobacteria;order:Rhizobiales;family:Rhizobiaceae;genus:Rhizobium;	1.17097	1.13757	1.21489	1.10611	1.29999	1.21936	1.29071	1.08133	1.12054
46409008	alginase	Sphingomonas sp. A1	Carbon Cycling	Carbon degradation	Alginate	superkingdom:Bacteria;phylum:Proteobacteria;class:Alphaproteobacteria;order:Sphingomonadales;family:Sphingomonadaceae;genus:Sphingomonas;	1.17333	1.1	1.08642	1.06951	1.21431	1.21158	1.1142	1.06078	1.12247
9501763	alginase	Sphingomonas sp.	Carbon Cycling	Carbon degradation	Alginate	superkingdom:Bacteria;phylum:Proteobacteria;class:Alphaproteobacteria;order:Sphingomonadales;family:Sphingomonadaceae;genus:Sphingomonas;	0.987852	0.987632	1.00287	1.04242	0.964507	1.01098	0.991438	1.03494	1.01254
338782684	alginase	Achromobacter xylosoxidans AXX-A	Carbon Cycling	Carbon degradation	Alginate	superkingdom:Bacteria;phylum:Proteobacteria;class:Betaproteobacteria;order:Burkholderiales;family:Alcaligenaceae;genus:Achromobacter;species:Achromobacter xylosoxidans;	1.15036	1.11963	1.12293	1.12534	1.07669	1.15654	1.10292	1.09203	1.10517
115423897	alginase	Bordetella avium 197N	Carbon Cycling	Carbon degradation	Alginate	superkingdom:Bacteria;phylum:Proteobacteria;class:Betaproteobacteria;order:Burkholderiales;family:Alcaligenaceae;genus:Bordetella;species:Bordetella avium;	1.16299	1.17422	1.20293	1.32641	1.21992	1.23938	1.18209	1.25059	1.21276
78060288	alginase	Burkholderia sp. 383	Carbon Cycling	Carbon degradation	Alginate	superkingdom:Bacteria;phylum:Proteobacteria;class:Betaproteobacteria;order:Burkholderiales;family:Burkholderiaceae;genus:Burkholderia;	0.984839	1.0092	0.966815	1.07456	0.986509	1.03432	0.946436	0.915135	1.02526
327371633	alginase	Burkholderia gladioli BSR3	Carbon Cycling	Carbon degradation	Alginate	superkingdom:Bacteria;phylum:Proteobacteria;class:Betaproteobacteria;order:Burkholderiales;family:Burkholderiaceae;genus:Burkholderia;species:Burkholderia gladioli;	0.835975	0.838823	0.844185	0.918733	0.830213	0.847826	0.826838	0.89842	0.861753
327373658	alginase	Burkholderia gladioli BSR3	Carbon Cycling	Carbon degradation	Alginate	superkingdom:Bacteria;phylum:Proteobacteria;class:Betaproteobacteria;order:Burkholderiales;family:Burkholderiaceae;genus:Burkholderia;species:Burkholderia gladioli;	1.09422	1.06803	1.09975	1.0588	1.10522	1.16973	1.17895	1.07703	1.01211
310824867	alginase	Stigmatella aurantiaca DW4/3-1	Carbon Cycling	Carbon degradation	Alginate	superkingdom:Bacteria;phylum:Proteobacteria;class:Deltaproteobacteria;order:Myxococcales;family:Cystobacteraceae;genus:Stigmatella;species:Stigmatella aurantiaca;	1.18703	1.0793	1.16471	1.0603	1.27176	1.1708	1.18281	1.05393	1.18463
152029691	alginase	Anaeromyxobacter sp. Fw109-5	Carbon Cycling	Carbon degradation	Alginate	superkingdom:Bacteria;phylum:Proteobacteria;class:Deltaproteobacteria;order:Myxococcales;family:Myxococcaceae;genus:Anaeromyxobacter;	1.31009	1.26179	1.26625	1.2925	1.24233	1.29796	1.29132	1.16073	1.29208
149918733	alginase	Plesiocystis pacifica SIR-1	Carbon Cycling	Carbon degradation	Alginate	superkingdom:Bacteria;phylum:Proteobacteria;class:Deltaproteobacteria;order:Myxococcales;family:Nannocystaceae;genus:Plesiocystis;species:Plesiocystis pacifica;	1.15085	1.14954	1.1303	1.15791	1.08124	1.20892	1.10517	1.10095	1.12644
237500435	alginase	Tolumonas auensis DSM 9187	Carbon Cycling	Carbon degradation	Alginate	superkingdom:Bacteria;phylum:Proteobacteria;class:Gammaproteobacteria;order:Aeromonadales;family:Aeromonadaceae;genus:Tolumonas;species:Tolumonas auensis;	1.06788	1.06786	1.05979	0.980885	1.04674	1.01504	1.00799	1.05071	1.02506
237500428	alginase	Tolumonas auensis DSM 9187	Carbon Cycling	Carbon degradation	Alginate	superkingdom:Bacteria;phylum:Proteobacteria;class:Gammaproteobacteria;order:Aeromonadales;family:Aeromonadaceae;genus:Tolumonas;species:Tolumonas auensis;	NA	NA	NA	0.826108	NA	0.776664	NA	NA	NA
238908450	alginase	Agarivorans sp. JAM-A1m	Carbon Cycling	Carbon degradation	Alginate	superkingdom:Bacteria;phylum:Proteobacteria;class:Gammaproteobacteria;order:Alteromonadales;family:Alteromonadaceae;genus:Agarivorans;	0.816804	0.861255	0.823822	0.825589	0.802004	0.87958	0.833642	0.86308	0.878301
332994780	alginase	Alteromonas sp. SN2	Carbon Cycling	Carbon degradation	Alginate	superkingdom:Bacteria;phylum:Proteobacteria;class:Gammaproteobacteria;order:Alteromonadales;family:Alteromonadaceae;genus:Alteromonas;	1.1006	1.14832	1.13954	1.28805	1.14602	1.19138	1.1264	1.1997	1.17048
149375960	alginase	Marinobacter algicola DG893	Carbon Cycling	Carbon degradation	Alginate	superkingdom:Bacteria;phylum:Proteobacteria;class:Gammaproteobacteria;order:Alteromonadales;family:Alteromonadaceae;genus:Marinobacter;species:Marinobacter algicola;	0.984074	0.848994	0.903621	0.893343	0.915891	0.998262	0.951386	NA	0.940411
319993261	alginase	Microbulbifer sp. 6532A	Carbon Cycling	Carbon degradation	Alginate	superkingdom:Bacteria;phylum:Proteobacteria;class:Gammaproteobacteria;order:Alteromonadales;family:Alteromonadaceae;genus:Microbulbifer;	1.11861	1.05183	1.14017	1.03524	1.08527	0.955761	1.11873	1.03928	1.05219
372267087	alginase	Alteromonas sp. S89	Carbon Cycling	Carbon degradation	Alginate	superkingdom:Bacteria;phylum:Proteobacteria;class:Gammaproteobacteria;order:Alteromonadales;family:Alteromonadaceae;genus:Microbulbifer;species:Microbulbifer agarilyticus;	0.928451	0.914527	0.91582	0.989992	0.939237	0.928841	0.915935	0.930966	0.94009
372266348	alginase	Alteromonas sp. S89	Carbon Cycling	Carbon degradation	Alginate	superkingdom:Bacteria;phylum:Proteobacteria;class:Gammaproteobacteria;order:Alteromonadales;family:Alteromonadaceae;genus:Microbulbifer;species:Microbulbifer agarilyticus;	1.27248	1.22933	1.27685	1.13965	1.29254	1.23582	1.2396	1.23823	1.23851
89951792	alginase	Saccharophagus degradans 2-40	Carbon Cycling	Carbon degradation	Alginate	superkingdom:Bacteria;phylum:Proteobacteria;class:Gammaproteobacteria;order:Alteromonadales;family:Alteromonadaceae;genus:Saccharophagus;species:Saccharophagus degradans;	0.877693	0.800084	0.877735	0.881592	0.922967	0.94072	0.844255	0.848863	0.873599
90022192	alginase	Saccharophagus degradans 2-40	Carbon Cycling	Carbon degradation	Alginate	superkingdom:Bacteria;phylum:Proteobacteria;class:Gammaproteobacteria;order:Alteromonadales;family:Alteromonadaceae;genus:Saccharophagus;species:Saccharophagus degradans;	1.04636	0.935727	1.00424	0.922624	1.01683	1.03955	1.03955	0.971519	1.08223
89952115a	alginase	Saccharophagus degradans 2-40	Carbon Cycling	Carbon degradation	Alginate	superkingdom:Bacteria;phylum:Proteobacteria;class:Gammaproteobacteria;order:Alteromonadales;family:Alteromonadaceae;genus:Saccharophagus;species:Saccharophagus degradans;	1.1131	1.13059	1.1356	1.22834	1.117	1.1698	1.11898	1.19744	1.18341
89952512	alginase	Saccharophagus degradans 2-40	Carbon Cycling	Carbon degradation	Alginate	superkingdom:Bacteria;phylum:Proteobacteria;class:Gammaproteobacteria;order:Alteromonadales;family:Alteromonadaceae;genus:Saccharophagus;species:Saccharophagus degradans;	0.904292	0.916733	0.900238	0.886429	0.938826	0.949665	0.910269	NA	0.925647
89951723	alginase	Saccharophagus degradans 2-40	Carbon Cycling	Carbon degradation	Alginate	superkingdom:Bacteria;phylum:Proteobacteria;class:Gammaproteobacteria;order:Alteromonadales;family:Alteromonadaceae;genus:Saccharophagus;species:Saccharophagus degradans;	0.923466	0.938913	1.02718	0.866385	1.00493	0.922438	0.966016	0.989021	0.921536
89952081	alginase	Saccharophagus degradans 2-40	Carbon Cycling	Carbon degradation	Alginate	superkingdom:Bacteria;phylum:Proteobacteria;class:Gammaproteobacteria;order:Alteromonadales;family:Alteromonadaceae;genus:Saccharophagus;species:Saccharophagus degradans;	0.995594	1.03959	0.955252	0.986216	1.00549	1.00453	1.08504	1.02822	0.964921
89952115b	alginase	Saccharophagus degradans 2-40	Carbon Cycling	Carbon degradation	Alginate	superkingdom:Bacteria;phylum:Proteobacteria;class:Gammaproteobacteria;order:Alteromonadales;family:Alteromonadaceae;genus:Saccharophagus;species:Saccharophagus degradans;	NA	NA	NA	NA	NA	NA	NA	0.839651	0.766556
90020931	alginase	Saccharophagus degradans 2-40	Carbon Cycling	Carbon degradation	Alginate	superkingdom:Bacteria;phylum:Proteobacteria;class:Gammaproteobacteria;order:Alteromonadales;family:Alteromonadaceae;genus:Saccharophagus;species:Saccharophagus degradans;	NA	0.807876	0.82283	0.779213	NA	0.815804	0.771201	0.7866	0.835891
90022926	alginase	Saccharophagus degradans 2-40	Carbon Cycling	Carbon degradation	Alginate	superkingdom:Bacteria;phylum:Proteobacteria;class:Gammaproteobacteria;order:Alteromonadales;family:Alteromonadaceae;genus:Saccharophagus;species:Saccharophagus degradans;	NA	0.770108	0.74417	0.777841	0.795202	0.73693	0.772447	0.829331	0.785807
223451999	alginase	Pseudoalteromonas sp. CY24	Carbon Cycling	Carbon degradation	Alginate	superkingdom:Bacteria;phylum:Proteobacteria;class:Gammaproteobacteria;order:Alteromonadales;family:Pseudoalteromonadaceae;genus:Pseudoalteromonas;	0.896426	0.874744	0.887759	0.75458	0.886962	0.818217	0.861674	0.851298	0.843608
332535754	alginase	Pseudoalteromonas haloplanktis ANT/505	Carbon Cycling	Carbon degradation	Alginate	superkingdom:Bacteria;phylum:Proteobacteria;class:Gammaproteobacteria;order:Alteromonadales;family:Pseudoalteromonadaceae;genus:Pseudoalteromonas;species:Pseudoalteromonas haloplanktis;	0.924714	0.801596	0.863456	0.785029	0.983587	NA	0.901113	0.867324	0.884962
291068318	alginase	Citrobacter youngae ATCC 29220	Carbon Cycling	Carbon degradation	Alginate	superkingdom:Bacteria;phylum:Proteobacteria;class:Gammaproteobacteria;order:Enterobacteriales;family:Enterobacteriaceae;genus:Citrobacter;species:Citrobacter youngae;	0.8088	0.813153	0.789499	0.874588	0.838829	0.851347	0.818325	0.844798	0.844744
271498891	alginase	Dickeya dadantii Ech586	Carbon Cycling	Carbon degradation	Alginate	superkingdom:Bacteria;phylum:Proteobacteria;class:Gammaproteobacteria;order:Enterobacteriales;family:Enterobacteriaceae;genus:Dickeya;species:Dickeya dadantii;	1.13307	1.00775	1.08416	1.03298	1.20053	1.15904	1.08495	1.06464	1.14777
307129095	alginase	Dickeya dadantii 3937	Carbon Cycling	Carbon degradation	Alginate	superkingdom:Bacteria;phylum:Proteobacteria;class:Gammaproteobacteria;order:Enterobacteriales;family:Enterobacteriaceae;genus:Dickeya;species:Dickeya dadantii;	1.22026	1.18913	1.23211	1.20706	1.27017	1.24705	1.1852	1.03793	1.2254
251791344	alginase	Dickeya zeae Ech1591	Carbon Cycling	Carbon degradation	Alginate	superkingdom:Bacteria;phylum:Proteobacteria;class:Gammaproteobacteria;order:Enterobacteriales;family:Enterobacteriaceae;genus:Dickeya;species:Dickeya zeae;	1.04376	1.01886	1.03854	0.94228	1.05561	0.902213	1.02946	1.05	1.0076
146311691	alginase	Enterobacter sp. 638	Carbon Cycling	Carbon degradation	Alginate	superkingdom:Bacteria;phylum:Proteobacteria;class:Gammaproteobacteria;order:Enterobacteriales;family:Enterobacteriaceae;genus:Enterobacter;	0.840503	0.844314	0.845836	0.904111	0.854423	0.882036	0.826475	0.936797	0.876002
345093293	alginase	Enterobacter asburiae LF7a	Carbon Cycling	Carbon degradation	Alginate	superkingdom:Bacteria;phylum:Proteobacteria;class:Gammaproteobacteria;order:Enterobacteriales;family:Enterobacteriaceae;genus:Enterobacter;species:Enterobacter asburiae;	0.798798	0.835101	0.833566	NA	0.728575	0.783275	NA	NA	NA
311280394	alginase	Enterobacter cloacae SCF1	Carbon Cycling	Carbon degradation	Alginate	superkingdom:Bacteria;phylum:Proteobacteria;class:Gammaproteobacteria;order:Enterobacteriales;family:Enterobacteriaceae;genus:Enterobacter;species:Enterobacter lignolyticus;	0.794528	0.770569	0.777114	0.847334	0.83558	0.866715	0.814648	NA	0.798637
188535493	alginase	Erwinia tasmaniensis Et1/99	Carbon Cycling	Carbon degradation	Alginate	superkingdom:Bacteria;phylum:Proteobacteria;class:Gammaproteobacteria;order:Enterobacteriales;family:Enterobacteriaceae;genus:Erwinia;species:Erwinia tasmaniensis;	0.987686	1.00495	1.00852	0.99642	0.999692	1.0178	0.97127	1.02187	1.03329
459864	alginase	Klebsiella pneumoniae	Carbon Cycling	Carbon degradation	Alginate	superkingdom:Bacteria;phylum:Proteobacteria;class:Gammaproteobacteria;order:Enterobacteriales;family:Enterobacteriaceae;genus:Klebsiella;	1.11287	1.12012	1.09877	1.09179	1.1155	1.11154	1.09134	1.11117	1.10673
376383836	alginase	Klebsiella oxytoca 10-5245	Carbon Cycling	Carbon degradation	Alginate	superkingdom:Bacteria;phylum:Proteobacteria;class:Gammaproteobacteria;order:Enterobacteriales;family:Enterobacteriaceae;genus:Klebsiella;species:Klebsiella oxytoca;	0.967278	0.916411	0.912833	0.92417	0.969227	0.984182	0.962582	0.804718	0.985144
376383200	alginase	Klebsiella oxytoca 10-5243	Carbon Cycling	Carbon degradation	Alginate	superkingdom:Bacteria;phylum:Proteobacteria;class:Gammaproteobacteria;order:Enterobacteriales;family:Enterobacteriaceae;genus:Klebsiella;species:Klebsiella oxytoca;	0.914783	NA	0.777415	NA	NA	NA	NA	NA	NA
288934731	alginase	Klebsiella variicola At-22	Carbon Cycling	Carbon degradation	Alginate	superkingdom:Bacteria;phylum:Proteobacteria;class:Gammaproteobacteria;order:Enterobacteriales;family:Enterobacteriaceae;genus:Klebsiella;species:Klebsiella variicola;	0.845174	0.890351	0.876526	0.794208	0.8788	0.839994	0.845052	0.88181	0.835102
317046977	alginase	Pantoea sp. At-9b	Carbon Cycling	Carbon degradation	Alginate	superkingdom:Bacteria;phylum:Proteobacteria;class:Gammaproteobacteria;order:Enterobacteriales;family:Enterobacteriaceae;genus:Pantoea;	1.12954	1.07705	1.11425	1.14423	1.09039	1.13906	1.11023	1.08297	1.12178
50119278	alginase	Pectobacterium atrosepticum SCRI1043	Carbon Cycling	Carbon degradation	Alginate	superkingdom:Bacteria;phylum:Proteobacteria;class:Gammaproteobacteria;order:Enterobacteriales;family:Enterobacteriaceae;genus:Pectobacterium;species:Pectobacterium atrosepticum;	1.28882	1.19165	1.26488	1.22368	1.43145	1.24646	1.28116	1.1807	1.17104
227112767a	alginase	Pectobacterium carotovorum subsp. brasiliensis PBR1692	Carbon Cycling	Carbon degradation	Alginate	superkingdom:Bacteria;phylum:Proteobacteria;class:Gammaproteobacteria;order:Enterobacteriales;family:Enterobacteriaceae;genus:Pectobacterium;species:Pectobacterium carotovorum;	1.11908	1.12478	1.15654	1.05791	1.13056	1.11685	1.16052	1.08187	1.09521
227112767b	alginase	Pectobacterium carotovorum subsp. brasiliensis PBR1692	Carbon Cycling	Carbon degradation	Alginate	superkingdom:Bacteria;phylum:Proteobacteria;class:Gammaproteobacteria;order:Enterobacteriales;family:Enterobacteriaceae;genus:Pectobacterium;species:Pectobacterium carotovorum;	NA	NA	NA	0.733663	NA	0.767689	NA	NA	NA
251753287	alginase	Pectobacterium carotovorum subsp. carotovorum PC1	Carbon Cycling	Carbon degradation	Alginate	superkingdom:Bacteria;phylum:Proteobacteria;class:Gammaproteobacteria;order:Enterobacteriales;family:Enterobacteriaceae;genus:Pectobacterium;species:Pectobacterium carotovorum;	0.867307	0.855752	0.870637	0.781431	0.883665	0.815968	0.797058	0.886147	0.793813
261819664	alginase	Pectobacterium wasabiae WPP163	Carbon Cycling	Carbon degradation	Alginate	superkingdom:Bacteria;phylum:Proteobacteria;class:Gammaproteobacteria;order:Enterobacteriales;family:Enterobacteriaceae;genus:Pectobacterium;species:Pectobacterium wasabiae;	1.00069	0.966363	0.970109	1.05079	1.02752	1.01717	0.991203	0.977689	1.01798
322832784	alginase	Rahnella sp. Y9602	Carbon Cycling	Carbon degradation	Alginate	superkingdom:Bacteria;phylum:Proteobacteria;class:Gammaproteobacteria;order:Enterobacteriales;family:Enterobacteriaceae;genus:Rahnella;	0.946647	0.916514	0.920889	0.960185	0.913131	0.96142	0.937458	0.945632	0.906834
371588337	alginase	Rahnella aquatilis CIP 78.65 = ATCC 33071	Carbon Cycling	Carbon degradation	Alginate	superkingdom:Bacteria;phylum:Proteobacteria;class:Gammaproteobacteria;order:Enterobacteriales;family:Enterobacteriaceae;genus:Rahnella;species:Rahnella aquatilis;	1.21355	1.21298	1.20495	1.26469	1.23875	1.24525	1.20541	1.23422	1.23501
351779783	alginase	Yersinia enterocolitica subsp. palearctica PhRBD_Ye1	Carbon Cycling	Carbon degradation	Alginate	superkingdom:Bacteria;phylum:Proteobacteria;class:Gammaproteobacteria;order:Enterobacteriales;family:Enterobacteriaceae;genus:Yersinia;species:Yersinia enterocolitica;	NA	NA	NA	NA	0.872893	0.778378	NA	NA	NA
351780661	alginase	Yersinia enterocolitica subsp. palearctica PhRBD_Ye1	Carbon Cycling	Carbon degradation	Alginate	superkingdom:Bacteria;phylum:Proteobacteria;class:Gammaproteobacteria;order:Enterobacteriales;family:Enterobacteriaceae;genus:Yersinia;species:Yersinia enterocolitica;	0.971619	0.870519	0.978036	0.828732	1.04005	0.958596	0.933183	0.817887	0.92587
238723106	alginase	Yersinia frederiksenii ATCC 33641	Carbon Cycling	Carbon degradation	Alginate	superkingdom:Bacteria;phylum:Proteobacteria;class:Gammaproteobacteria;order:Enterobacteriales;family:Enterobacteriaceae;genus:Yersinia;species:Yersinia frederiksenii;	0.872562	0.827505	NA	0.881952	1.03925	1.01751	0.848832	NA	0.924838
238761788	alginase	Yersinia kristensenii ATCC 33638	Carbon Cycling	Carbon degradation	Alginate	superkingdom:Bacteria;phylum:Proteobacteria;class:Gammaproteobacteria;order:Enterobacteriales;family:Enterobacteriaceae;genus:Yersinia;species:Yersinia kristensenii;	1.05106	1.03963	1.06103	1.08864	1.10404	1.07447	1.05147	1.08535	1.0834
238799046	alginase	Yersinia mollaretii ATCC 43969	Carbon Cycling	Carbon degradation	Alginate	superkingdom:Bacteria;phylum:Proteobacteria;class:Gammaproteobacteria;order:Enterobacteriales;family:Enterobacteriaceae;genus:Yersinia;species:Yersinia mollaretii;	0.957712	0.910158	0.938665	0.932209	0.889696	0.956036	0.899065	0.9004	0.942466
238750148	alginase	Yersinia rohdei ATCC 43380	Carbon Cycling	Carbon degradation	Alginate	superkingdom:Bacteria;phylum:Proteobacteria;class:Gammaproteobacteria;order:Enterobacteriales;family:Enterobacteriaceae;genus:Yersinia;species:Yersinia rohdei;	1.01321	0.945192	0.97745	0.974521	0.992561	1.0076	1.00723	0.932386	1.00078
110646365	alginase	Alcanivorax borkumensis SK2	Carbon Cycling	Carbon degradation	Alginate	superkingdom:Bacteria;phylum:Proteobacteria;class:Gammaproteobacteria;order:Oceanospirillales;family:Alcanivoracaceae;genus:Alcanivorax;species:Alcanivorax borkumensis;	1.11344	0.998249	1.07915	1.0801	1.18534	1.1567	1.06531	1.02365	1.1626
2828271	alginase	Azotobacter chroococcum	Carbon Cycling	Carbon degradation	Alginate	superkingdom:Bacteria;phylum:Proteobacteria;class:Gammaproteobacteria;order:Pseudomonadales;family:Pseudomonadaceae;genus:Azotobacter;	1.09539	1.10423	1.0985	1.15964	1.0856	1.10734	1.09338	1.13591	1.13448
226944485	alginase	Azotobacter vinelandii DJ	Carbon Cycling	Carbon degradation	Alginate	superkingdom:Bacteria;phylum:Proteobacteria;class:Gammaproteobacteria;order:Pseudomonadales;family:Pseudomonadaceae;genus:Azotobacter;species:Azotobacter vinelandii;	NA	NA	NA	NA	0.743095	0.758992	NA	NA	NA
324099790	alginase	Pseudomonas sp. TJI-51	Carbon Cycling	Carbon degradation	Alginate	superkingdom:Bacteria;phylum:Proteobacteria;class:Gammaproteobacteria;order:Pseudomonadales;family:Pseudomonadaceae;genus:Pseudomonas;	1.03186	1.06089	1.04846	1.10762	1.07436	1.1067	1.05234	1.00327	1.07528
291508621	alginase	Pseudomonas alkylphenolia	Carbon Cycling	Carbon degradation	Alginate	superkingdom:Bacteria;phylum:Proteobacteria;class:Gammaproteobacteria;order:Pseudomonadales;family:Pseudomonadaceae;genus:Pseudomonas;	0.999268	0.98748	0.994996	0.975503	1.01438	0.979659	0.9707	0.851578	1.0195
363418013	alginase	Pseudomonas sp. KS-408	Carbon Cycling	Carbon degradation	Alginate	superkingdom:Bacteria;phylum:Proteobacteria;class:Gammaproteobacteria;order:Pseudomonadales;family:Pseudomonadaceae;genus:Pseudomonas;	1.09364	1.07452	1.10738	1.10973	1.06112	1.08664	1.08335	1.11778	1.11265
620120	alginase	Pseudomonas alginovora	Carbon Cycling	Carbon degradation	Alginate	superkingdom:Bacteria;phylum:Proteobacteria;class:Gammaproteobacteria;order:Pseudomonadales;family:Pseudomonadaceae;genus:Pseudomonas;	1.02338	0.992136	0.982054	0.903578	1.06964	1.08898	1.06956	0.943735	0.973168
327380400	alginase	Pseudomonas brassicacearum subsp. brassicacearum NFM421	Carbon Cycling	Carbon degradation	Alginate	superkingdom:Bacteria;phylum:Proteobacteria;class:Gammaproteobacteria;order:Pseudomonadales;family:Pseudomonadaceae;genus:Pseudomonas;species:Pseudomonas brassicacearum;	0.799425	0.838303	NA	NA	0.785509	0.775472	NA	0.830547	0.754759
330811553	alginase	Pseudomonas brassicacearum subsp. brassicacearum NFM421	Carbon Cycling	Carbon degradation	Alginate	superkingdom:Bacteria;phylum:Proteobacteria;class:Gammaproteobacteria;order:Pseudomonadales;family:Pseudomonadaceae;genus:Pseudomonas;species:Pseudomonas brassicacearum;	0.855666	NA	0.868634	0.700332	0.856089	NA	0.837645	0.795829	0.772791
327380401	alginase	Pseudomonas brassicacearum subsp. brassicacearum NFM421	Carbon Cycling	Carbon degradation	Alginate	superkingdom:Bacteria;phylum:Proteobacteria;class:Gammaproteobacteria;order:Pseudomonadales;family:Pseudomonadaceae;genus:Pseudomonas;species:Pseudomonas brassicacearum;	1.15529	1.12485	1.0337	1.10756	1.12968	1.13773	1.14003	0.967203	1.18692
331022693	alginase	Pseudomonas syringae pv. oryzae str. 1_6	Carbon Cycling	Carbon degradation	Alginate	superkingdom:Bacteria;phylum:Proteobacteria;class:Gammaproteobacteria;order:Pseudomonadales;family:Pseudomonadaceae;genus:Pseudomonas;species:Pseudomonas coronafaciens;	0.91532	0.958605	0.956602	0.906389	0.940555	0.942068	0.92738	0.966614	0.866083
331022213	alginase	Pseudomonas syringae pv. oryzae str. 1_6	Carbon Cycling	Carbon degradation	Alginate	superkingdom:Bacteria;phylum:Proteobacteria;class:Gammaproteobacteria;order:Pseudomonadales;family:Pseudomonadaceae;genus:Pseudomonas;species:Pseudomonas coronafaciens;	0.933118	0.914188	0.921307	0.993363	0.962759	0.979403	0.921716	0.902781	0.988165
104782500	alginase	Pseudomonas entomophila L48	Carbon Cycling	Carbon degradation	Alginate	superkingdom:Bacteria;phylum:Proteobacteria;class:Gammaproteobacteria;order:Pseudomonadales;family:Pseudomonadaceae;genus:Pseudomonas;species:Pseudomonas entomophila;	1.06571	1.14478	1.12308	1.08272	1.05271	1.14686	1.08205	1.06842	1.10022
104783508	alginase	Pseudomonas entomophila L48	Carbon Cycling	Carbon degradation	Alginate	superkingdom:Bacteria;phylum:Proteobacteria;class:Gammaproteobacteria;order:Pseudomonadales;family:Pseudomonadaceae;genus:Pseudomonas;species:Pseudomonas entomophila;	1.4565	1.38942	1.44497	1.38984	1.47961	1.3457	1.47397	1.40694	1.35588
359763373	alginase	Pseudomonas fluorescens F113	Carbon Cycling	Carbon degradation	Alginate	superkingdom:Bacteria;phylum:Proteobacteria;class:Gammaproteobacteria;order:Pseudomonadales;family:Pseudomonadaceae;genus:Pseudomonas;species:Pseudomonas fluorescens;	0.917389	0.961173	0.893232	1.03473	0.918839	0.961147	0.895173	0.928773	0.963065
311286862	alginase	Pseudomonas fluorescens WH6	Carbon Cycling	Carbon degradation	Alginate	superkingdom:Bacteria;phylum:Proteobacteria;class:Gammaproteobacteria;order:Pseudomonadales;family:Pseudomonadaceae;genus:Pseudomonas;species:Pseudomonas fluorescens;	1.07711	0.993002	1.07381	0.962129	1.20052	1.04825	1.01097	0.996209	1.0143
359760141	alginase	Pseudomonas fluorescens F113	Carbon Cycling	Carbon degradation	Alginate	superkingdom:Bacteria;phylum:Proteobacteria;class:Gammaproteobacteria;order:Pseudomonadales;family:Pseudomonadaceae;genus:Pseudomonas;species:Pseudomonas fluorescens;	1.04359	1.05851	1.01196	1.07872	1.01402	1.03383	1.00328	1.03421	1.05321
311284402	alginase	Pseudomonas fluorescens WH6	Carbon Cycling	Carbon degradation	Alginate	superkingdom:Bacteria;phylum:Proteobacteria;class:Gammaproteobacteria;order:Pseudomonadales;family:Pseudomonadaceae;genus:Pseudomonas;species:Pseudomonas fluorescens;	0.78198	0.82896	0.800923	0.725285	0.760355	0.783016	0.801156	0.819325	0.745918
333117332	alginase	Pseudomonas fulva 12-X	Carbon Cycling	Carbon degradation	Alginate	superkingdom:Bacteria;phylum:Proteobacteria;class:Gammaproteobacteria;order:Pseudomonadales;family:Pseudomonadaceae;genus:Pseudomonas;species:Pseudomonas fulva;	1.05078	1.01731	1.03392	1.06175	1.04552	1.09167	1.04911	1.13605	1.08214
330503534	alginase	Pseudomonas mendocina NK-01	Carbon Cycling	Carbon degradation	Alginate	superkingdom:Bacteria;phylum:Proteobacteria;class:Gammaproteobacteria;order:Pseudomonadales;family:Pseudomonadaceae;genus:Pseudomonas;species:Pseudomonas mendocina;	NA	NA	NA	0.794782	NA	0.819378	NA	NA	NA
145576279	alginase	Pseudomonas mendocina ymp	Carbon Cycling	Carbon degradation	Alginate	superkingdom:Bacteria;phylum:Proteobacteria;class:Gammaproteobacteria;order:Pseudomonadales;family:Pseudomonadaceae;genus:Pseudomonas;species:Pseudomonas mendocina;	0.864634	0.879784	0.877421	0.784664	0.842037	0.824867	0.868908	0.854758	0.79302
146306697	alginase	Pseudomonas mendocina ymp	Carbon Cycling	Carbon degradation	Alginate	superkingdom:Bacteria;phylum:Proteobacteria;class:Gammaproteobacteria;order:Pseudomonadales;family:Pseudomonadaceae;genus:Pseudomonas;species:Pseudomonas mendocina;	1.15002	1.14489	1.156	1.24123	1.18332	1.19847	1.16505	1.20715	1.17475
146307605	alginase	Pseudomonas mendocina ymp	Carbon Cycling	Carbon degradation	Alginate	superkingdom:Bacteria;phylum:Proteobacteria;class:Gammaproteobacteria;order:Pseudomonadales;family:Pseudomonadaceae;genus:Pseudomonas;species:Pseudomonas mendocina;	1.01376	1.03722	1.02707	0.993764	1.05034	1.02028	1.02601	0.791419	1.06481
330501989	alginase	Pseudomonas mendocina NK-01	Carbon Cycling	Carbon degradation	Alginate	superkingdom:Bacteria;phylum:Proteobacteria;class:Gammaproteobacteria;order:Pseudomonadales;family:Pseudomonadaceae;genus:Pseudomonas;species:Pseudomonas mendocina;	NA	NA	NA	0.802408	0.934617	0.766149	0.83806	0.821554	0.833334
145574260	alginase	Pseudomonas mendocina ymp	Carbon Cycling	Carbon degradation	Alginate	superkingdom:Bacteria;phylum:Proteobacteria;class:Gammaproteobacteria;order:Pseudomonadales;family:Pseudomonadaceae;genus:Pseudomonas;species:Pseudomonas mendocina;	NA	NA	NA	NA	0.74365	0.777741	NA	NA	NA
145575331	alginase	Pseudomonas mendocina ymp	Carbon Cycling	Carbon degradation	Alginate	superkingdom:Bacteria;phylum:Proteobacteria;class:Gammaproteobacteria;order:Pseudomonadales;family:Pseudomonadaceae;genus:Pseudomonas;species:Pseudomonas mendocina;	1.02665	1.04954	1.03657	1.17856	1.03917	1.07593	0.982977	1.0768	1.04078
346643288	alginase	Pseudomonas fluorescens Pf-5	Carbon Cycling	Carbon degradation	Alginate	superkingdom:Bacteria;phylum:Proteobacteria;class:Gammaproteobacteria;order:Pseudomonadales;family:Pseudomonadaceae;genus:Pseudomonas;species:Pseudomonas protegens;	0.976102	0.92173	0.969601	0.944769	0.932178	0.964099	0.943619	0.984801	0.934649
68342698	alginase	Pseudomonas fluorescens Pf-5	Carbon Cycling	Carbon degradation	Alginate	superkingdom:Bacteria;phylum:Proteobacteria;class:Gammaproteobacteria;order:Pseudomonadales;family:Pseudomonadaceae;genus:Pseudomonas;species:Pseudomonas protegens;	1.36685	1.38194	1.39499	1.37952	1.35306	1.4017	1.42165	1.36777	1.35187
170720068	alginase	Pseudomonas putida W619	Carbon Cycling	Carbon degradation	Alginate	superkingdom:Bacteria;phylum:Proteobacteria;class:Gammaproteobacteria;order:Pseudomonadales;family:Pseudomonadaceae;genus:Pseudomonas;species:Pseudomonas putida;	1.12995	1.09245	1.19443	1.10024	1.1946	1.05158	1.10444	1.13235	1.09961
339489295	alginase	Pseudomonas putida S16	Carbon Cycling	Carbon degradation	Alginate	superkingdom:Bacteria;phylum:Proteobacteria;class:Gammaproteobacteria;order:Pseudomonadales;family:Pseudomonadaceae;genus:Pseudomonas;species:Pseudomonas putida;	0.875967	0.812873	0.797542	0.778599	0.853259	0.828594	0.863541	NA	0.871966
71556835	alginase	Pseudomonas syringae pv. phaseolicola 1448A	Carbon Cycling	Carbon degradation	Alginate	superkingdom:Bacteria;phylum:Proteobacteria;class:Gammaproteobacteria;order:Pseudomonadales;family:Pseudomonadaceae;genus:Pseudomonas;species:Pseudomonas savastanoi;	0.838383	NA	0.844983	NA	NA	NA	NA	NA	NA
330962136	alginase	Pseudomonas syringae pv. maculicola str. ES4326	Carbon Cycling	Carbon degradation	Alginate	superkingdom:Bacteria;phylum:Proteobacteria;class:Gammaproteobacteria;order:Pseudomonadales;family:Pseudomonadaceae;genus:Pseudomonas;species:Pseudomonas syringae group genomosp. 3;	0.87032	NA	0.858692	NA	NA	NA	NA	0.870255	0.804304
330961139	alginase	Pseudomonas syringae pv. maculicola str. ES4326	Carbon Cycling	Carbon degradation	Alginate	superkingdom:Bacteria;phylum:Proteobacteria;class:Gammaproteobacteria;order:Pseudomonadales;family:Pseudomonadaceae;genus:Pseudomonas;species:Pseudomonas syringae group genomosp. 3;	0.851774	0.83946	0.819869	0.804909	0.799516	0.852702	0.79808	0.83313	0.793768
330941657	alginase	Pseudomonas syringae pv. pisi str. 1704B	Carbon Cycling	Carbon degradation	Alginate	superkingdom:Bacteria;phylum:Proteobacteria;class:Gammaproteobacteria;order:Pseudomonadales;family:Pseudomonadaceae;genus:Pseudomonas;species:Pseudomonas syringae;	0.837145	0.853654	0.869805	0.818088	0.880013	0.826107	0.80895	0.853996	0.788961
330963772	alginase	Pseudomonas syringae pv. actinidiae str. M302091	Carbon Cycling	Carbon degradation	Alginate	superkingdom:Bacteria;phylum:Proteobacteria;class:Gammaproteobacteria;order:Pseudomonadales;family:Pseudomonadaceae;genus:Pseudomonas;species:Pseudomonas syringae;	NA	0.817956	0.789748	0.888158	0.806879	0.792991	0.788091	0.878435	0.845151
320526236	alginase	Vibrio midae	Carbon Cycling	Carbon degradation	Alginate	superkingdom:Bacteria;phylum:Proteobacteria;class:Gammaproteobacteria;order:Vibrionales;family:Vibrionaceae;genus:Vibrio;	0.889106	0.903371	0.902561	0.848662	0.913875	0.891375	0.895614	0.890993	0.890744
269960758	alginase	Vibrio harveyi 1DA3	Carbon Cycling	Carbon degradation	Alginate	superkingdom:Bacteria;phylum:Proteobacteria;class:Gammaproteobacteria;order:Vibrionales;family:Vibrionaceae;genus:Vibrio;species:Vibrio harveyi;	1.01427	0.89252	0.925794	0.810794	0.906307	0.800446	0.855272	0.86852	0.852458
269960782	alginase	Vibrio harveyi 1DA3	Carbon Cycling	Carbon degradation	Alginate	superkingdom:Bacteria;phylum:Proteobacteria;class:Gammaproteobacteria;order:Vibrionales;family:Vibrionaceae;genus:Vibrio;species:Vibrio harveyi;	0.789249	0.78098	0.776239	0.861887	0.822642	0.787542	0.858653	0.870209	0.838864
84387685	alginase	Vibrio splendidus 12B01	Carbon Cycling	Carbon degradation	Alginate	superkingdom:Bacteria;phylum:Proteobacteria;class:Gammaproteobacteria;order:Vibrionales;family:Vibrionaceae;genus:Vibrio;species:Vibrio splendidus;	1.16925	1.03657	1.09563	0.958321	1.22081	1.01599	1.03161	1.00707	1.04343
84386987a	alginase	Vibrio splendidus 12B01	Carbon Cycling	Carbon degradation	Alginate	superkingdom:Bacteria;phylum:Proteobacteria;class:Gammaproteobacteria;order:Vibrionales;family:Vibrionaceae;genus:Vibrio;species:Vibrio splendidus;	1.13923	1.10994	1.13558	1.1295	1.16904	1.13518	1.13036	0.951691	1.15959
84386987b	alginase	Vibrio splendidus 12B01	Carbon Cycling	Carbon degradation	Alginate	superkingdom:Bacteria;phylum:Proteobacteria;class:Gammaproteobacteria;order:Vibrionales;family:Vibrionaceae;genus:Vibrio;species:Vibrio splendidus;	0.813428	0.775033	0.784241	0.835595	0.82546	0.847717	0.817117	0.860987	0.847042
84378061	alginase	Vibrio splendidus 12B01	Carbon Cycling	Carbon degradation	Alginate	superkingdom:Bacteria;phylum:Proteobacteria;class:Gammaproteobacteria;order:Vibrionales;family:Vibrionaceae;genus:Vibrio;species:Vibrio splendidus;	0.959416	0.972789	0.958708	0.960223	0.927359	0.960952	0.935781	0.865394	0.984485
194348647	alginase	Stenotrophomonas maltophilia R551-3	Carbon Cycling	Carbon degradation	Alginate	superkingdom:Bacteria;phylum:Proteobacteria;class:Gammaproteobacteria;order:Xanthomonadales;family:Xanthomonadaceae;genus:Stenotrophomonas;species:Stenotrophomonas maltophilia;	1.49311	1.42906	1.48592	1.45214	1.58111	1.39721	1.50567	1.44854	1.47535
190012449	alginase	Stenotrophomonas maltophilia K279a	Carbon Cycling	Carbon degradation	Alginate	superkingdom:Bacteria;phylum:Proteobacteria;class:Gammaproteobacteria;order:Xanthomonadales;family:Xanthomonadaceae;genus:Stenotrophomonas;species:Stenotrophomonas maltophilia;	1.09439	1.06939	1.0122	1.09314	1.09467	1.10883	1.11318	1.02965	1.114
373851807	alginase	Opitutaceae bacterium TAV5	Carbon Cycling	Carbon degradation	Alginate	superkingdom:Bacteria;phylum:Verrucomicrobia;class:Opitutae;family:Opitutaceae;	1.07103	1.03109	1.12987	1.03559	1.07024	1.03718	1.05121	1.00646	1.06234
373852473	alginase	Opitutaceae bacterium TAV5	Carbon Cycling	Carbon degradation	Alginate	superkingdom:Bacteria;phylum:Verrucomicrobia;class:Opitutae;family:Opitutaceae;	1.08079	1.08538	1.07174	1.17035	1.10994	1.11734	1.09443	1.14378	1.10839
225155684	alginase	Diplosphaera colitermitum TAV2	Carbon Cycling	Carbon degradation	Alginate	superkingdom:Bacteria;phylum:Verrucomicrobia;class:Opitutae;family:Opitutaceae;genus:Diplosphaera;species:Diplosphaera colitermitum;	1.26734	1.30194	1.30587	1.27847	1.21978	1.1984	1.28952	1.25522	1.25106
225164047	alginase	Diplosphaera colitermitum TAV2	Carbon Cycling	Carbon degradation	Alginate	superkingdom:Bacteria;phylum:Verrucomicrobia;class:Opitutae;family:Opitutaceae;genus:Diplosphaera;species:Diplosphaera colitermitum;	0.786782	0.835697	0.808803	0.824119	0.782449	0.81301	0.787013	NA	0.798266
196229564	alginase	Chthoniobacter flavus Ellin428	Carbon Cycling	Carbon degradation	Alginate	superkingdom:Bacteria;phylum:Verrucomicrobia;class:Spartobacteria;genus:Chthoniobacter;species:Chthoniobacter flavus;	0.935711	0.923307	0.94391	0.921926	0.929122	0.936092	0.934682	0.969418	1.00054
357079593	camdcab	Frankia sp. CN3	Carbon Cycling	Carbon degradation	Camphor	superkingdom:Bacteria;phylum:Actinobacteria;class:Actinobacteria;order:Actinomycetales;family:Frankiaceae;genus:Frankia;	1.09322	1.06477	1.15663	1.0754	1.17778	1.02413	1.08452	1.1157	1.07124
111223515	camdcab	Frankia alni ACN14a	Carbon Cycling	Carbon degradation	Camphor	superkingdom:Bacteria;phylum:Actinobacteria;class:Actinobacteria;order:Actinomycetales;family:Frankiaceae;genus:Frankia;species:Frankia alni;	1.55672	1.52663	1.56211	1.45455	1.6227	1.4909	1.55725	1.52398	1.5202
111150767	camdcab	Frankia alni ACN14a	Carbon Cycling	Carbon degradation	Camphor	superkingdom:Bacteria;phylum:Actinobacteria;class:Actinobacteria;order:Actinomycetales;family:Frankiaceae;genus:Frankia;species:Frankia alni;	1.45576	1.43974	1.45805	1.43254	1.43492	1.45521	1.46961	1.41034	1.44985
353190035	camdcab	Mycobacterium rhodesiae JS60	Carbon Cycling	Carbon degradation	Camphor	superkingdom:Bacteria;phylum:Actinobacteria;class:Actinobacteria;order:Actinomycetales;family:Mycobacteriaceae;genus:Mycobacterium;species:Mycobacterium rhodesiae;	0.866364	0.89419	0.848553	1.03531	0.864836	0.922471	0.836294	0.943616	0.922525
334344633	camdcab	Sphingobium chlorophenolicum L-1	Carbon Cycling	Carbon degradation	Camphor	superkingdom:Bacteria;phylum:Proteobacteria;class:Alphaproteobacteria;order:Sphingomonadales;family:Sphingomonadaceae;genus:Sphingobium;species:Sphingobium chlorophenolicum;	1.20269	1.18574	1.17678	1.16988	1.21139	1.21489	1.13095	1.17718	1.14
334343066	camdcab	Sphingobium chlorophenolicum L-1	Carbon Cycling	Carbon degradation	Camphor	superkingdom:Bacteria;phylum:Proteobacteria;class:Alphaproteobacteria;order:Sphingomonadales;family:Sphingomonadaceae;genus:Sphingobium;species:Sphingobium chlorophenolicum;	0.975419	1.02521	1.03962	1.17373	1.0435	1.08498	1.01232	1.0872	1.01223
334103263	camdcab	Sphingobium chlorophenolicum L-1	Carbon Cycling	Carbon degradation	Camphor	superkingdom:Bacteria;phylum:Proteobacteria;class:Alphaproteobacteria;order:Sphingomonadales;family:Sphingomonadaceae;genus:Sphingobium;species:Sphingobium chlorophenolicum;	1.05115	1.05379	1.06967	1.05971	1.00444	1.11916	1.02586	1.02548	1.08625
357975266	camdcab	Sphingomonas sp. KC8	Carbon Cycling	Carbon degradation	Camphor	superkingdom:Bacteria;phylum:Proteobacteria;class:Alphaproteobacteria;order:Sphingomonadales;family:Sphingomonadaceae;genus:Sphingomonas;	1.23092	1.21376	1.23253	1.26085	1.26228	1.25877	1.24955	1.14316	1.26998
219677975	camdcab	gamma proteobacterium NOR51-B	Carbon Cycling	Carbon degradation	Camphor	superkingdom:Bacteria;phylum:Proteobacteria;class:Gammaproteobacteria;	0.876893	0.789033	0.773482	0.757523	0.843855	0.846985	0.909788	NA	0.937408
299767072	axe	uncultured fungus	Carbon Cycling	Carbon degradation	Cellulose	superkingdom:Eukaryota;kingdom:Fungi;	1.30777	1.32262	1.32669	1.41851	1.33674	1.35432	1.32307	1.37095	1.35799
299767076	axe	uncultured fungus	Carbon Cycling	Carbon degradation	Cellulose	superkingdom:Eukaryota;kingdom:Fungi;	0.973404	0.937211	0.836337	0.915837	0.941972	0.959083	0.945194	0.799772	1.00606
299767074	axe	uncultured fungus	Carbon Cycling	Carbon degradation	Cellulose	superkingdom:Eukaryota;kingdom:Fungi;	0.906622	0.824036	0.844677	0.856466	0.960758	0.894857	0.913326	0.813776	0.928462
339468175	axe	Mycosphaerella graminicola IPO323	Carbon Cycling	Carbon degradation	Cellulose	superkingdom:Eukaryota;kingdom:Fungi;phylum:Ascomycota;class:Dothideomycetes;order:Capnodiales;family:Mycosphaerellaceae;genus:Zymoseptoria;species:Zymoseptoria tritici;	0.942634	0.907197	0.92629	0.898138	0.961107	0.937182	0.900074	NA	0.951492
312213427	axe	Leptosphaeria maculans JN3	Carbon Cycling	Carbon degradation	Cellulose	superkingdom:Eukaryota;kingdom:Fungi;phylum:Ascomycota;class:Dothideomycetes;order:Pleosporales;family:Leptosphaeriaceae;genus:Leptosphaeria;species:Leptosphaeria maculans;	0.965151	1.02678	0.968357	1.09707	0.955032	0.985726	0.946748	1.0246	1.00694
312221667	axe	Leptosphaeria maculans JN3	Carbon Cycling	Carbon degradation	Cellulose	superkingdom:Eukaryota;kingdom:Fungi;phylum:Ascomycota;class:Dothideomycetes;order:Pleosporales;family:Leptosphaeriaceae;genus:Leptosphaeria;species:Leptosphaeria maculans;	1.0283	1.01931	1.03104	1.0741	1.05454	1.04513	1.01971	1.02654	1.03875
187982733	axe	Pyrenophora tritici-repentis Pt-1C-BFP	Carbon Cycling	Carbon degradation	Cellulose	superkingdom:Eukaryota;kingdom:Fungi;phylum:Ascomycota;class:Dothideomycetes;order:Pleosporales;family:Pleosporaceae;genus:Pyrenophora;species:Pyrenophora tritici-repentis;	1.36823	1.34667	1.38836	1.41018	1.29556	1.34981	1.36735	1.2736	1.40477
189200274	axe	Pyrenophora tritici-repentis Pt-1C-BFP	Carbon Cycling	Carbon degradation	Cellulose	superkingdom:Eukaryota;kingdom:Fungi;phylum:Ascomycota;class:Dothideomycetes;order:Pleosporales;family:Pleosporaceae;genus:Pyrenophora;species:Pyrenophora tritici-repentis;	NA	NA	NA	NA	0.747647	0.794019	NA	NA	NA
309697337	axe	Aspergillus aculeatus	Carbon Cycling	Carbon degradation	Cellulose	superkingdom:Eukaryota;kingdom:Fungi;phylum:Ascomycota;class:Eurotiomycetes;order:Eurotiales;family:Trichocomaceae;genus:Aspergillus;	0.88465	0.865082	0.856408	0.871668	0.813983	0.876478	0.870311	NA	0.911395
121712511	axe	Aspergillus clavatus NRRL 1	Carbon Cycling	Carbon degradation	Cellulose	superkingdom:Eukaryota;kingdom:Fungi;phylum:Ascomycota;class:Eurotiomycetes;order:Eurotiales;family:Trichocomaceae;genus:Aspergillus;species:Aspergillus clavatus;	0.909117	0.87681	0.895962	0.896236	0.917403	0.925516	0.906574	NA	0.917499
119396003	axe	Aspergillus clavatus NRRL 1	Carbon Cycling	Carbon degradation	Cellulose	superkingdom:Eukaryota;kingdom:Fungi;phylum:Ascomycota;class:Eurotiomycetes;order:Eurotiales;family:Trichocomaceae;genus:Aspergillus;species:Aspergillus clavatus;	0.747627	0.750354	0.726945	NA	NA	NA	0.777043	NA	0.756988
71001194	axe	Aspergillus fumigatus Af293	Carbon Cycling	Carbon degradation	Cellulose	superkingdom:Eukaryota;kingdom:Fungi;phylum:Ascomycota;class:Eurotiomycetes;order:Eurotiales;family:Trichocomaceae;genus:Aspergillus;species:Aspergillus fumigatus;	1.17773	1.16429	1.16618	1.11632	1.21182	1.15678	1.17065	0.962287	1.21645
70983864	axe	Aspergillus fumigatus Af293	Carbon Cycling	Carbon degradation	Cellulose	superkingdom:Eukaryota;kingdom:Fungi;phylum:Ascomycota;class:Eurotiomycetes;order:Eurotiales;family:Trichocomaceae;genus:Aspergillus;species:Aspergillus fumigatus;	0.806972	0.892843	0.842929	0.891333	0.8547	0.856364	0.829255	0.862126	0.847124
115443316a	axe	Aspergillus terreus NIH2624	Carbon Cycling	Carbon degradation	Cellulose	superkingdom:Eukaryota;kingdom:Fungi;phylum:Ascomycota;class:Eurotiomycetes;order:Eurotiales;family:Trichocomaceae;genus:Aspergillus;species:Aspergillus terreus;	1.1484	1.07716	1.10077	1.12519	1.07088	1.1239	1.12032	1.10855	1.14864
115391459b	axe	Aspergillus terreus NIH2624	Carbon Cycling	Carbon degradation	Cellulose	superkingdom:Eukaryota;kingdom:Fungi;phylum:Ascomycota;class:Eurotiomycetes;order:Eurotiales;family:Trichocomaceae;genus:Aspergillus;species:Aspergillus terreus;	NA	NA	NA	NA	NA	NA	0.869391	NA	0.828421
115396496	axe	Aspergillus terreus NIH2624	Carbon Cycling	Carbon degradation	Cellulose	superkingdom:Eukaryota;kingdom:Fungi;phylum:Ascomycota;class:Eurotiomycetes;order:Eurotiales;family:Trichocomaceae;genus:Aspergillus;species:Aspergillus terreus;	0.857153	0.841876	0.845049	0.862781	0.859744	0.841294	0.843997	0.914987	0.873709
119485504a	axe	Neosartorya fischeri NRRL 181	Carbon Cycling	Carbon degradation	Cellulose	superkingdom:Eukaryota;kingdom:Fungi;phylum:Ascomycota;class:Eurotiomycetes;order:Eurotiales;family:Trichocomaceae;genus:Neosartorya;species:Neosartorya fischeri;	1.11256	1.12293	1.12314	1.17409	1.1502	1.12322	1.13678	1.18386	1.14736
119485504b	axe	Neosartorya fischeri NRRL 181	Carbon Cycling	Carbon degradation	Cellulose	superkingdom:Eukaryota;kingdom:Fungi;phylum:Ascomycota;class:Eurotiomycetes;order:Eurotiales;family:Trichocomaceae;genus:Neosartorya;species:Neosartorya fischeri;	0.810777	0.775777	0.813081	0.888098	0.805655	0.841603	0.813801	0.852629	0.812774
241660026	axe	Penicillium aurantiogriseum	Carbon Cycling	Carbon degradation	Cellulose	superkingdom:Eukaryota;kingdom:Fungi;phylum:Ascomycota;class:Eurotiomycetes;order:Eurotiales;family:Trichocomaceae;genus:Penicillium;	0.890615	0.875757	0.891241	0.891591	0.929491	0.868704	0.892471	0.881246	0.928824
211586161	axe	Penicillium chrysogenum Wisconsin 54-1255	Carbon Cycling	Carbon degradation	Cellulose	superkingdom:Eukaryota;kingdom:Fungi;phylum:Ascomycota;class:Eurotiomycetes;order:Eurotiales;family:Trichocomaceae;genus:Penicillium;species:Penicillium chrysogenum;	0.947007	0.949605	0.953186	0.958709	0.857773	0.962196	0.912693	NA	0.937781
22135562	axe	Penicillium purpurogenum	Carbon Cycling	Carbon degradation	Cellulose	superkingdom:Eukaryota;kingdom:Fungi;phylum:Ascomycota;class:Eurotiomycetes;order:Eurotiales;family:Trichocomaceae;genus:Talaromyces;	1.14955	1.05595	1.1771	1.06409	1.16287	1.09282	1.1479	1.08002	1.04004
2944191	axe	Penicillium purpurogenum	Carbon Cycling	Carbon degradation	Cellulose	superkingdom:Eukaryota;kingdom:Fungi;phylum:Ascomycota;class:Eurotiomycetes;order:Eurotiales;family:Trichocomaceae;genus:Talaromyces;	1.0632	1.0551	1.08206	1.05164	1.09977	1.0545	1.05746	0.987288	1.08146
212541749	axe	Penicillium marneffei ATCC 18224	Carbon Cycling	Carbon degradation	Cellulose	superkingdom:Eukaryota;kingdom:Fungi;phylum:Ascomycota;class:Eurotiomycetes;order:Eurotiales;family:Trichocomaceae;genus:Talaromyces;species:Talaromyces marneffei;	0.930243	0.924547	0.948343	0.901661	0.92173	0.95874	0.903786	0.903393	0.859076
212539978a	axe	Penicillium marneffei ATCC 18224	Carbon Cycling	Carbon degradation	Cellulose	superkingdom:Eukaryota;kingdom:Fungi;phylum:Ascomycota;class:Eurotiomycetes;order:Eurotiales;family:Trichocomaceae;genus:Talaromyces;species:Talaromyces marneffei;	1.00813	1.00079	0.997718	0.951403	1.00621	0.982829	0.963656	0.968679	0.964704
212525994b	axe	Penicillium marneffei ATCC 18224	Carbon Cycling	Carbon degradation	Cellulose	superkingdom:Eukaryota;kingdom:Fungi;phylum:Ascomycota;class:Eurotiomycetes;order:Eurotiales;family:Trichocomaceae;genus:Talaromyces;species:Talaromyces marneffei;	0.874705	0.882779	0.862639	0.90589	0.90257	0.899312	0.854751	0.903931	0.896208
242803173	axe	Talaromyces stipitatus ATCC 10500	Carbon Cycling	Carbon degradation	Cellulose	superkingdom:Eukaryota;kingdom:Fungi;phylum:Ascomycota;class:Eurotiomycetes;order:Eurotiales;family:Trichocomaceae;genus:Talaromyces;species:Talaromyces stipitatus;	0.80718	0.830645	0.8388	0.823984	0.805748	0.810087	0.788825	0.820765	0.817962
291177410	axe	Arthroderma benhamiae CBS 112371	Carbon Cycling	Carbon degradation	Cellulose	superkingdom:Eukaryota;kingdom:Fungi;phylum:Ascomycota;class:Eurotiomycetes;order:Onygenales;family:Arthrodermataceae;genus:Arthroderma;species:Arthroderma benhamiae;	0.928307	0.959003	0.922777	0.993366	0.956841	0.987442	0.918684	0.995184	0.962132
302503769	axe	Arthroderma benhamiae CBS 112371	Carbon Cycling	Carbon degradation	Cellulose	superkingdom:Eukaryota;kingdom:Fungi;phylum:Ascomycota;class:Eurotiomycetes;order:Onygenales;family:Arthrodermataceae;genus:Arthroderma;species:Arthroderma benhamiae;	0.890046	0.929484	0.888889	0.872795	0.838304	0.883308	0.831138	0.860489	0.859922
296803783	axe	Arthroderma otae CBS 113480	Carbon Cycling	Carbon degradation	Cellulose	superkingdom:Eukaryota;kingdom:Fungi;phylum:Ascomycota;class:Eurotiomycetes;order:Onygenales;family:Arthrodermataceae;genus:Arthroderma;species:Arthroderma otae;	0.8493	0.837962	0.812589	0.802643	0.837237	0.851392	0.867009	NA	0.866057
302423900a	axe	Verticillium albo-atrum VaMs.102	Carbon Cycling	Carbon degradation	Cellulose	superkingdom:Eukaryota;kingdom:Fungi;phylum:Ascomycota;class:Sordariomycetes;order:Glomerellales;family:Plectosphaerellaceae;genus:Verticillium;species:Verticillium alfalfae;	1.3054	1.26893	1.18116	1.2611	1.24219	1.27424	1.3161	1.17037	1.32746
302417270	axe	Verticillium albo-atrum VaMs.102	Carbon Cycling	Carbon degradation	Cellulose	superkingdom:Eukaryota;kingdom:Fungi;phylum:Ascomycota;class:Sordariomycetes;order:Glomerellales;family:Plectosphaerellaceae;genus:Verticillium;species:Verticillium alfalfae;	0.843875	NA	0.763356	0.853818	0.905811	0.905806	0.838463	NA	0.905946
302423900b	axe	Verticillium albo-atrum VaMs.102	Carbon Cycling	Carbon degradation	Cellulose	superkingdom:Eukaryota;kingdom:Fungi;phylum:Ascomycota;class:Sordariomycetes;order:Glomerellales;family:Plectosphaerellaceae;genus:Verticillium;species:Verticillium alfalfae;	0.833609	0.870035	0.873784	0.818928	0.813232	NA	0.862451	0.901008	0.809486
302404006	axe	Verticillium albo-atrum VaMs.102	Carbon Cycling	Carbon degradation	Cellulose	superkingdom:Eukaryota;kingdom:Fungi;phylum:Ascomycota;class:Sordariomycetes;order:Glomerellales;family:Plectosphaerellaceae;genus:Verticillium;species:Verticillium alfalfae;	1.31471	1.32397	1.32029	1.41789	1.35142	1.36789	1.32416	1.38333	1.3641
302423390	axe	Verticillium albo-atrum VaMs.102	Carbon Cycling	Carbon degradation	Cellulose	superkingdom:Eukaryota;kingdom:Fungi;phylum:Ascomycota;class:Sordariomycetes;order:Glomerellales;family:Plectosphaerellaceae;genus:Verticillium;species:Verticillium alfalfae;	0.935399	0.870831	0.915704	0.811407	0.991186	0.883024	0.933012	0.903406	0.848491
346970842	axe	Verticillium dahliae VdLs.17	Carbon Cycling	Carbon degradation	Cellulose	superkingdom:Eukaryota;kingdom:Fungi;phylum:Ascomycota;class:Sordariomycetes;order:Glomerellales;family:Plectosphaerellaceae;genus:Verticillium;species:Verticillium dahliae;	1.40808	1.33159	1.46258	1.31765	1.43469	1.29669	1.41228	1.3391	1.35352
346975888	axe	Verticillium dahliae VdLs.17	Carbon Cycling	Carbon degradation	Cellulose	superkingdom:Eukaryota;kingdom:Fungi;phylum:Ascomycota;class:Sordariomycetes;order:Glomerellales;family:Plectosphaerellaceae;genus:Verticillium;species:Verticillium dahliae;	1.40207	1.34577	1.2964	1.32226	1.3233	1.44997	1.37907	1.15877	1.39402
1431620	axe	Hypocrea jecorina	Carbon Cycling	Carbon degradation	Cellulose	superkingdom:Eukaryota;kingdom:Fungi;phylum:Ascomycota;class:Sordariomycetes;order:Hypocreales;family:Hypocreaceae;genus:Trichoderma;	0.89009	0.913749	0.91485	0.944585	0.930671	0.904651	0.918893	0.973143	0.949098
351650244	axe	Magnaporthe oryzae 70-15	Carbon Cycling	Carbon degradation	Cellulose	superkingdom:Eukaryota;kingdom:Fungi;phylum:Ascomycota;class:Sordariomycetes;order:Magnaporthales;family:Magnaporthaceae;genus:Magnaporthe;species:Magnaporthe oryzae;	0.848739	0.87559	0.906984	0.803655	0.860253	NA	0.872262	0.88702	0.846475
116200458	axe	Chaetomium globosum CBS 148.51	Carbon Cycling	Carbon degradation	Cellulose	superkingdom:Eukaryota;kingdom:Fungi;phylum:Ascomycota;class:Sordariomycetes;order:Sordariales;family:Chaetomiaceae;genus:Chaetomium;species:Chaetomium globosum;	1.0775	1.07376	1.08715	1.06944	1.01351	1.09776	1.05147	1.01919	1.09505
170936249	axe	Podospora anserina S mat+	Carbon Cycling	Carbon degradation	Cellulose	superkingdom:Eukaryota;kingdom:Fungi;phylum:Ascomycota;class:Sordariomycetes;order:Sordariales;family:Lasiosphaeriaceae;genus:Podospora;species:Podospora anserina;	1.19541	1.19105	1.20691	1.30778	1.2301	1.24748	1.19448	1.26488	1.23864
28920527	axe	Neurospora crassa OR74A	Carbon Cycling	Carbon degradation	Cellulose	superkingdom:Eukaryota;kingdom:Fungi;phylum:Ascomycota;class:Sordariomycetes;order:Sordariales;family:Sordariaceae;genus:Neurospora;species:Neurospora crassa;	1.182	1.17543	1.1698	1.14048	1.1249	1.26335	1.1652	1.03362	1.18762
85091086a	axe	Neurospora crassa OR74A	Carbon Cycling	Carbon degradation	Cellulose	superkingdom:Eukaryota;kingdom:Fungi;phylum:Ascomycota;class:Sordariomycetes;order:Sordariales;family:Sordariaceae;genus:Neurospora;species:Neurospora crassa;	0.99657	0.998524	0.857651	0.921373	1.01903	0.96675	1.00688	0.86068	1.01378
85113565	axe	Neurospora crassa OR74A	Carbon Cycling	Carbon degradation	Cellulose	superkingdom:Eukaryota;kingdom:Fungi;phylum:Ascomycota;class:Sordariomycetes;order:Sordariales;family:Sordariaceae;genus:Neurospora;species:Neurospora crassa;	1.07288	0.958325	1.03203	1.07347	1.14635	1.16207	1.03784	0.98496	1.14326
85091086b	axe	Neurospora crassa OR74A	Carbon Cycling	Carbon degradation	Cellulose	superkingdom:Eukaryota;kingdom:Fungi;phylum:Ascomycota;class:Sordariomycetes;order:Sordariales;family:Sordariaceae;genus:Neurospora;species:Neurospora crassa;	0.98203	0.906168	0.932855	0.956844	0.937071	0.981911	0.930205	0.840043	0.96207
336264045	axe	Sordaria macrospora k-hell	Carbon Cycling	Carbon degradation	Cellulose	superkingdom:Eukaryota;kingdom:Fungi;phylum:Ascomycota;class:Sordariomycetes;order:Sordariales;family:Sordariaceae;genus:Sordaria;species:Sordaria macrospora;	0.813391	0.868133	0.845573	0.785769	0.859701	0.816067	0.858737	0.939125	0.838708
299750604	axe	Coprinopsis cinerea okayama7_130	Carbon Cycling	Carbon degradation	Cellulose	superkingdom:Eukaryota;kingdom:Fungi;phylum:Basidiomycota;class:Agaricomycetes;order:Agaricales;family:Psathyrellaceae;genus:Coprinopsis;species:Coprinopsis cinerea;	1.01512	1.04693	1.04813	1.20401	1.07642	1.10392	1.02722	1.09553	1.05391
169856114a	axe	Coprinopsis cinerea okayama7_130	Carbon Cycling	Carbon degradation	Cellulose	superkingdom:Eukaryota;kingdom:Fungi;phylum:Basidiomycota;class:Agaricomycetes;order:Agaricales;family:Psathyrellaceae;genus:Coprinopsis;species:Coprinopsis cinerea;	0.801001	0.88481	0.858531	1.01256	0.860228	0.877575	0.855865	0.893658	0.877837
169848044	axe	Coprinopsis cinerea okayama7_130	Carbon Cycling	Carbon degradation	Cellulose	superkingdom:Eukaryota;kingdom:Fungi;phylum:Basidiomycota;class:Agaricomycetes;order:Agaricales;family:Psathyrellaceae;genus:Coprinopsis;species:Coprinopsis cinerea;	0.866805	0.868492	0.816037	0.716784	NA	0.846031	0.870189	NA	0.902759
169856114b	axe	Coprinopsis cinerea okayama7_130	Carbon Cycling	Carbon degradation	Cellulose	superkingdom:Eukaryota;kingdom:Fungi;phylum:Basidiomycota;class:Agaricomycetes;order:Agaricales;family:Psathyrellaceae;genus:Coprinopsis;species:Coprinopsis cinerea;	NA	NA	NA	0.74246	0.791592	0.749244	NA	0.793313	0.79887
169867023	axe	Coprinopsis cinerea okayama7_130	Carbon Cycling	Carbon degradation	Cellulose	superkingdom:Eukaryota;kingdom:Fungi;phylum:Basidiomycota;class:Agaricomycetes;order:Agaricales;family:Psathyrellaceae;genus:Coprinopsis;species:Coprinopsis cinerea;	1.08936	1.15425	1.1482	1.21782	1.10248	1.16177	1.13527	1.15853	1.18727
300111343	axe	Schizophyllum commune H4-8	Carbon Cycling	Carbon degradation	Cellulose	superkingdom:Eukaryota;kingdom:Fungi;phylum:Basidiomycota;class:Agaricomycetes;order:Agaricales;family:Schizophyllaceae;genus:Schizophyllum;species:Schizophyllum commune;	1.12629	1.02788	1.08287	1.0259	1.17823	1.15254	1.19111	1.04478	1.10818
302694511	axe	Schizophyllum commune H4-8	Carbon Cycling	Carbon degradation	Cellulose	superkingdom:Eukaryota;kingdom:Fungi;phylum:Basidiomycota;class:Agaricomycetes;order:Agaricales;family:Schizophyllaceae;genus:Schizophyllum;species:Schizophyllum commune;	1.00012	0.866985	0.951448	0.928666	1.08557	1.04489	0.965126	0.900849	1.043
302678391	axe	Schizophyllum commune H4-8	Carbon Cycling	Carbon degradation	Cellulose	superkingdom:Eukaryota;kingdom:Fungi;phylum:Basidiomycota;class:Agaricomycetes;order:Agaricales;family:Schizophyllaceae;genus:Schizophyllum;species:Schizophyllum commune;	0.900792	0.929939	0.927459	0.885727	0.878289	0.966443	0.860048	0.886048	0.943078
302695935	axe	Schizophyllum commune H4-8	Carbon Cycling	Carbon degradation	Cellulose	superkingdom:Eukaryota;kingdom:Fungi;phylum:Basidiomycota;class:Agaricomycetes;order:Agaricales;family:Schizophyllaceae;genus:Schizophyllum;species:Schizophyllum commune;	1.01108	1.02489	1.049	1.13194	1.03074	1.07655	1.01383	1.08158	1.07677
170111461a	axe	Laccaria bicolor S238N-H82	Carbon Cycling	Carbon degradation	Cellulose	superkingdom:Eukaryota;kingdom:Fungi;phylum:Basidiomycota;class:Agaricomycetes;order:Agaricales;family:Tricholomataceae;genus:Laccaria;species:Laccaria bicolor;	0.880885	0.904702	0.919794	0.87475	0.951271	0.908853	0.946032	0.810106	0.930723
170111461b	axe	Laccaria bicolor S238N-H82	Carbon Cycling	Carbon degradation	Cellulose	superkingdom:Eukaryota;kingdom:Fungi;phylum:Basidiomycota;class:Agaricomycetes;order:Agaricales;family:Tricholomataceae;genus:Laccaria;species:Laccaria bicolor;	1.01366	1.01026	1.04841	0.988709	0.994753	1.03525	1.01764	1.04163	1.04287
353247761	axe	Piriformospora indica	Carbon Cycling	Carbon degradation	Cellulose	superkingdom:Eukaryota;kingdom:Fungi;phylum:Basidiomycota;class:Agaricomycetes;order:Sebacinales;family:Sebacinaceae;genus:Piriformospora;	1.15148	1.08495	1.09488	1.09446	1.08324	1.19053	1.2108	0.891893	1.22068
159041230	cellobiase	Caldivirga maquilingensis IC-167	Carbon Cycling	Carbon degradation	Cellulose	superkingdom:Archaea;phylum:Crenarchaeota;class:Thermoprotei;order:Thermoproteales;family:Thermoproteaceae;genus:Caldivirga;species:Caldivirga maquilingensis;	1.10126	1.08409	1.22421	1.01603	1.16417	1.0715	1.07622	1.0739	1.05572
126459244	cellobiase	Pyrobaculum calidifontis JCM 11548	Carbon Cycling	Carbon degradation	Cellulose	superkingdom:Archaea;phylum:Crenarchaeota;class:Thermoprotei;order:Thermoproteales;family:Thermoproteaceae;genus:Pyrobaculum;species:Pyrobaculum calidifontis;	0.881755	0.886546	0.899132	0.882623	0.878252	0.90531	0.893979	0.937277	0.85363
1399947	cellobiase	Pyrococcus furiosus	Carbon Cycling	Carbon degradation	Cellulose	superkingdom:Archaea;phylum:Euryarchaeota;class:Thermococci;order:Thermococcales;family:Thermococcaceae;genus:Pyrococcus;species:Pyrococcus furiosus;	0.866941	0.827476	0.818511	0.797278	0.843116	0.885321	0.845232	NA	0.858429
1914799	cellobiase	Thermococcus sp.	Carbon Cycling	Carbon degradation	Cellulose	superkingdom:Archaea;phylum:Euryarchaeota;class:Thermococci;order:Thermococcales;family:Thermococcaceae;genus:Thermococcus;	1.12939	1.07989	1.09931	1.03761	1.18233	1.18077	1.12457	1.06214	1.14889
242264718	cellobiase	Thermococcus sibiricus MM 739	Carbon Cycling	Carbon degradation	Cellulose	superkingdom:Archaea;phylum:Euryarchaeota;class:Thermococci;order:Thermococcales;family:Thermococcaceae;genus:Thermococcus;species:Thermococcus sibiricus;	1.00988	1.0231	1.00875	1.011	1.00684	1.02587	0.978182	1.02457	1.02706
289533993	cellobiase	Aciduliprofundum boonei T469	Carbon Cycling	Carbon degradation	Cellulose	superkingdom:Archaea;phylum:Euryarchaeota;genus:Aciduliprofundum;species:Aciduliprofundum boonei;	0.878028	0.885169	0.813063	0.825276	0.881985	0.892749	0.879702	0.848441	0.878536
378556245	cellobiase	uncultured bacterium	Carbon Cycling	Carbon degradation	Cellulose	superkingdom:Bacteria;	0.937723	0.990337	0.975678	1.14197	0.982509	1.03983	0.950317	1.04135	0.979845
239787498	cellobiase	uncultured bacterium	Carbon Cycling	Carbon degradation	Cellulose	superkingdom:Bacteria;	1.15162	1.03869	1.11241	1.01384	1.18292	1.10302	1.21211	1.01473	1.12969
269838975	cellobiase	Thermobaculum terrenum ATCC BAA-798	Carbon Cycling	Carbon degradation	Cellulose	superkingdom:Bacteria;genus:Thermobaculum;species:Thermobaculum terrenum;	1.23271	1.20635	1.12747	1.17738	1.21616	1.1854	1.23046	1.07273	1.25512
374311140	cellobiase	Granulicella mallensis MP5ACTX8	Carbon Cycling	Carbon degradation	Cellulose	superkingdom:Bacteria;phylum:Acidobacteria;class:Acidobacteriia;order:Acidobacteriales;family:Acidobacteriaceae;genus:Granulicella;species:Granulicella mallensis;	0.800703	NA	0.831664	0.806838	0.876536	0.814316	NA	0.808398	0.805844
358754723	cellobiase	Granulicella mallensis MP5ACTX8	Carbon Cycling	Carbon degradation	Cellulose	superkingdom:Bacteria;phylum:Acidobacteria;class:Acidobacteriia;order:Acidobacteriales;family:Acidobacteriaceae;genus:Granulicella;species:Granulicella mallensis;	NA	NA	NA	0.714456	0.775371	0.756678	NA	NA	NA
321165281	cellobiase	Granulicella tundricola MP5ACTX9	Carbon Cycling	Carbon degradation	Cellulose	superkingdom:Bacteria;phylum:Acidobacteria;class:Acidobacteriia;order:Acidobacteriales;family:Acidobacteriaceae;genus:Granulicella;species:Granulicella tundricola;	1.30369	1.3883	1.37353	1.41601	1.26346	1.35299	1.34507	1.29644	1.3285
320108613	cellobiase	Terriglobus saanensis SP1PR4	Carbon Cycling	Carbon degradation	Cellulose	superkingdom:Bacteria;phylum:Acidobacteria;class:Acidobacteriia;order:Acidobacteriales;family:Acidobacteriaceae;genus:Terriglobus;species:Terriglobus saanensis;	1.0351	1.01872	0.998089	1.01939	0.975281	1.07919	0.972588	1.05486	1.05699
117647806	cellobiase	Acidothermus cellulolyticus 11B	Carbon Cycling	Carbon degradation	Cellulose	superkingdom:Bacteria;phylum:Actinobacteria;class:Actinobacteria;order:Actinomycetales;family:Acidothermaceae;genus:Acidothermus;species:Acidothermus cellulolyticus;	0.884984	0.920239	0.863282	0.900827	0.842841	0.913507	0.841417	0.874963	0.919366
13676306	cellobiase	Actinomyces naeslundii	Carbon Cycling	Carbon degradation	Cellulose	superkingdom:Bacteria;phylum:Actinobacteria;class:Actinobacteria;order:Actinomycetales;family:Actinomycetaceae;genus:Actinomyces;	1.05964	1.06756	1.07106	1.12131	1.09596	1.09263	1.05165	1.1059	1.1092
339883741	cellobiase	Actinomyces sp. oral taxon 448 str. F0400	Carbon Cycling	Carbon degradation	Cellulose	superkingdom:Bacteria;phylum:Actinobacteria;class:Actinobacteria;order:Actinomycetales;family:Actinomycetaceae;genus:Actinomyces;species:Actinomyces sp. oral taxon 448;	1.09437	1.08119	1.09812	1.12915	1.01082	1.06019	1.07474	1.05707	1.10619
226834715	cellobiase	Actinomyces urogenitalis DSM 15434	Carbon Cycling	Carbon degradation	Cellulose	superkingdom:Bacteria;phylum:Actinobacteria;class:Actinobacteria;order:Actinomycetales;family:Actinomycetaceae;genus:Actinomyces;species:Actinomyces urogenitalis;	1.16372	1.18749	1.19074	1.19909	1.12447	1.24564	1.20123	1.12617	1.1795
326636631	cellobiase	Actinomyces viscosus C505	Carbon Cycling	Carbon degradation	Cellulose	superkingdom:Bacteria;phylum:Actinobacteria;class:Actinobacteria;order:Actinomycetales;family:Actinomycetaceae;genus:Actinomyces;species:Actinomyces viscosus;	1.14926	1.08929	1.13911	1.08668	1.31045	1.0402	1.16974	1.11113	1.18174
256391712	cellobiase	Catenulispora acidiphila DSM 44928	Carbon Cycling	Carbon degradation	Cellulose	superkingdom:Bacteria;phylum:Actinobacteria;class:Actinobacteria;order:Actinomycetales;family:Catenulisporaceae;genus:Catenulispora;species:Catenulispora acidiphila;	1.22662	1.13289	1.08732	1.02425	1.18282	1.27062	1.24999	1.0648	1.30182
304359	cellobiase	NA	Carbon Cycling	Carbon degradation	Cellulose	superkingdom:Bacteria;phylum:Actinobacteria;class:Actinobacteria;order:Actinomycetales;family:Cellulomonadaceae;genus:Cellulomonas;	1.10592	1.07901	1.05181	1.04867	1.10866	1.03443	1.04892	0.952341	1.09833
224947212	cellobiase	Corynebacterium matruchotii ATCC 33806	Carbon Cycling	Carbon degradation	Cellulose	superkingdom:Bacteria;phylum:Actinobacteria;class:Actinobacteria;order:Actinomycetales;family:Corynebacteriaceae;genus:Corynebacterium;species:Corynebacterium matruchotii;	1.12069	1.11942	1.18128	1.07939	1.12173	1.07687	1.11407	1.12429	1.12604
288346373	cellobiase	Frankia sp. EUN1f	Carbon Cycling	Carbon degradation	Cellulose	superkingdom:Bacteria;phylum:Actinobacteria;class:Actinobacteria;order:Actinomycetales;family:Frankiaceae;genus:Frankia;	1.0485	1.06651	1.04808	1.0251	1.00585	1.03649	1.00695	1.00881	1.0576
158317215	cellobiase	Frankia sp. EAN1pec	Carbon Cycling	Carbon degradation	Cellulose	superkingdom:Bacteria;phylum:Actinobacteria;class:Actinobacteria;order:Actinomycetales;family:Frankiaceae;genus:Frankia;	1.00329	0.965064	1.00766	1.03197	1.04227	1.01567	1.01563	0.952354	1.02899
229749363	cellobiase	Stackebrandtia nassauensis DSM 44728	Carbon Cycling	Carbon degradation	Cellulose	superkingdom:Bacteria;phylum:Actinobacteria;class:Actinobacteria;order:Actinomycetales;family:Glycomycetaceae;genus:Stackebrandtia;species:Stackebrandtia nassauensis;	0.960062	1.01773	0.967658	1.0344	0.924381	0.982688	0.929838	0.976046	1.01644
343764817	cellobiase	Gordonia alkanivorans NBRC 16433	Carbon Cycling	Carbon degradation	Cellulose	superkingdom:Bacteria;phylum:Actinobacteria;class:Actinobacteria;order:Actinomycetales;family:Gordoniaceae;genus:Gordonia;species:Gordonia alkanivorans;	0.959108	0.868984	0.933089	0.897228	1.05633	0.906044	0.890709	0.869633	0.875988
358240009	cellobiase	Gordonia amarae NBRC 15530	Carbon Cycling	Carbon degradation	Cellulose	superkingdom:Bacteria;phylum:Actinobacteria;class:Actinobacteria;order:Actinomycetales;family:Gordoniaceae;genus:Gordonia;species:Gordonia amarae;	0.773258	0.832313	NA	0.931468	0.818793	0.858933	0.765851	0.861719	0.791322
359418969	cellobiase	Gordonia araii NBRC 100433	Carbon Cycling	Carbon degradation	Cellulose	superkingdom:Bacteria;phylum:Actinobacteria;class:Actinobacteria;order:Actinomycetales;family:Gordoniaceae;genus:Gordonia;species:Gordonia araii;	0.9668	0.975025	0.962138	0.896707	0.978146	0.91156	0.925615	0.944359	0.917052
262201421	cellobiase	Gordonia bronchialis DSM 43247	Carbon Cycling	Carbon degradation	Cellulose	superkingdom:Bacteria;phylum:Actinobacteria;class:Actinobacteria;order:Actinomycetales;family:Gordoniaceae;genus:Gordonia;species:Gordonia bronchialis;	0.784494	NA	0.747227	0.74101	0.902418	0.855998	NA	NA	NA
377558716	cellobiase	Gordonia otitidis NBRC 100426	Carbon Cycling	Carbon degradation	Cellulose	superkingdom:Bacteria;phylum:Actinobacteria;class:Actinobacteria;order:Actinomycetales;family:Gordoniaceae;genus:Gordonia;species:Gordonia otitidis;	0.946395	0.95128	0.979712	1.02989	1.00769	0.983965	0.979402	1.02177	0.98268
359764917	cellobiase	Gordonia polyisoprenivorans NBRC 16320	Carbon Cycling	Carbon degradation	Cellulose	superkingdom:Bacteria;phylum:Actinobacteria;class:Actinobacteria;order:Actinomycetales;family:Gordoniaceae;genus:Gordonia;species:Gordonia polyisoprenivorans;	1.06882	1.08866	1.07907	1.18963	1.12381	1.13604	1.07222	1.15684	1.13582
377527685	cellobiase	Gordonia sputi NBRC 100414	Carbon Cycling	Carbon degradation	Cellulose	superkingdom:Bacteria;phylum:Actinobacteria;class:Actinobacteria;order:Actinomycetales;family:Gordoniaceae;genus:Gordonia;species:Gordonia sputi;	1.08883	1.07897	1.11226	1.07267	1.03659	1.01665	1.04983	1.0585	1.02146
377568850	cellobiase	Gordonia terrae NBRC 100016	Carbon Cycling	Carbon degradation	Cellulose	superkingdom:Bacteria;phylum:Actinobacteria;class:Actinobacteria;order:Actinomycetales;family:Gordoniaceae;genus:Gordonia;species:Gordonia terrae;	1.16571	1.16564	1.16948	1.25664	1.21469	1.20432	1.18674	1.22309	1.20015
256833098	cellobiase	Jonesia denitrificans DSM 20603	Carbon Cycling	Carbon degradation	Cellulose	superkingdom:Bacteria;phylum:Actinobacteria;class:Actinobacteria;order:Actinomycetales;family:Jonesiaceae;genus:Jonesia;species:Jonesia denitrificans;	0.876227	0.802906	0.805263	0.774529	0.985993	0.889998	0.820476	0.822495	0.777437
151362421	cellobiase	Kineococcus radiotolerans SRS30216	Carbon Cycling	Carbon degradation	Cellulose	superkingdom:Bacteria;phylum:Actinobacteria;class:Actinobacteria;order:Actinomycetales;family:Kineosporiaceae;genus:Kineococcus;species:Kineococcus radiotolerans;	1.15131	1.19154	1.16733	1.23268	1.15182	1.14825	1.15608	1.18081	1.19293
116671523	cellobiase	Arthrobacter sp. FB24	Carbon Cycling	Carbon degradation	Cellulose	superkingdom:Bacteria;phylum:Actinobacteria;class:Actinobacteria;order:Actinomycetales;family:Micrococcaceae;genus:Arthrobacter;	1.27666	1.24263	1.29686	1.29601	1.31936	1.30084	1.24902	1.13228	1.2947
116671987	cellobiase	Arthrobacter sp. FB24	Carbon Cycling	Carbon degradation	Cellulose	superkingdom:Bacteria;phylum:Actinobacteria;class:Actinobacteria;order:Actinomycetales;family:Micrococcaceae;genus:Arthrobacter;	0.950331	1.00551	0.97359	1.10907	0.964228	0.99732	0.952769	1.05607	1.01164
308176292a	cellobiase	Arthrobacter arilaitensis Re117	Carbon Cycling	Carbon degradation	Cellulose	superkingdom:Bacteria;phylum:Actinobacteria;class:Actinobacteria;order:Actinomycetales;family:Micrococcaceae;genus:Arthrobacter;species:Arthrobacter arilaitensis;	NA	NA	NA	NA	0.767136	0.766195	NA	NA	NA
169175749	cellobiase	Arthrobacter chlorophenolicus A6	Carbon Cycling	Carbon degradation	Cellulose	superkingdom:Bacteria;phylum:Actinobacteria;class:Actinobacteria;order:Actinomycetales;family:Micrococcaceae;genus:Arthrobacter;species:Arthrobacter chlorophenolicus;	1.11258	1.14971	1.15021	1.25711	1.12115	1.1624	1.13599	1.19526	1.2012
359779301	cellobiase	Arthrobacter globiformis NBRC 12137	Carbon Cycling	Carbon degradation	Cellulose	superkingdom:Bacteria;phylum:Actinobacteria;class:Actinobacteria;order:Actinomycetales;family:Micrococcaceae;genus:Arthrobacter;species:Arthrobacter globiformis;	0.961555	0.918619	0.866297	0.870145	0.878923	0.899852	0.929845	0.874667	0.970536
359777767	cellobiase	Arthrobacter globiformis NBRC 12137	Carbon Cycling	Carbon degradation	Cellulose	superkingdom:Bacteria;phylum:Actinobacteria;class:Actinobacteria;order:Actinomycetales;family:Micrococcaceae;genus:Arthrobacter;species:Arthrobacter globiformis;	1.10299	1.07702	1.01345	1.01092	1.04608	1.08867	1.09235	0.907984	1.13687
325961508	cellobiase	Arthrobacter phenanthrenivorans Sphe3	Carbon Cycling	Carbon degradation	Cellulose	superkingdom:Bacteria;phylum:Actinobacteria;class:Actinobacteria;order:Actinomycetales;family:Micrococcaceae;genus:Arthrobacter;species:Arthrobacter phenanthrenivorans;	1.09822	1.05103	1.0551	1.06815	1.04425	1.1308	1.11	0.944095	1.07237
222543298	cellobiase	Micrococcus antarcticus	Carbon Cycling	Carbon degradation	Cellulose	superkingdom:Bacteria;phylum:Actinobacteria;class:Actinobacteria;order:Actinomycetales;family:Micrococcaceae;genus:Micrococcus;	0.984142	1.00059	1.00347	0.96018	1.07823	1.04163	1.01259	1.04707	0.957122
311113712	cellobiase	Rothia dentocariosa ATCC 17931	Carbon Cycling	Carbon degradation	Cellulose	superkingdom:Bacteria;phylum:Actinobacteria;class:Actinobacteria;order:Actinomycetales;family:Micrococcaceae;genus:Rothia;species:Rothia dentocariosa;	1.06414	1.07351	1.07284	1.17137	1.11585	1.1275	1.08492	1.13515	1.07638
383782831	cellobiase	Actinoplanes missouriensis 431	Carbon Cycling	Carbon degradation	Cellulose	superkingdom:Bacteria;phylum:Actinobacteria;class:Actinobacteria;order:Actinomycetales;family:Micromonosporaceae;genus:Actinoplanes;species:Actinoplanes missouriensis;	1.0733	0.979938	1.02177	1.11367	1.08993	1.09984	1.08173	1.04284	1.12514
383775545	cellobiase	Actinoplanes missouriensis 431	Carbon Cycling	Carbon degradation	Cellulose	superkingdom:Bacteria;phylum:Actinobacteria;class:Actinobacteria;order:Actinomycetales;family:Micromonosporaceae;genus:Actinoplanes;species:Actinoplanes missouriensis;	0.939206	0.967691	0.935531	1.03156	0.867303	0.954524	0.890043	0.951674	0.907264
315411639	cellobiase	Micromonospora sp. L5	Carbon Cycling	Carbon degradation	Cellulose	superkingdom:Bacteria;phylum:Actinobacteria;class:Actinobacteria;order:Actinomycetales;family:Micromonosporaceae;genus:Micromonospora;	1.16118	1.15794	1.15751	1.22225	1.18846	1.18908	1.14123	1.19647	1.20007
119879899	cellobiase	Salinispora arenicola CNS205	Carbon Cycling	Carbon degradation	Cellulose	superkingdom:Bacteria;phylum:Actinobacteria;class:Actinobacteria;order:Actinomycetales;family:Micromonosporaceae;genus:Salinispora;species:Salinispora arenicola;	1.15528	1.0913	1.17784	1.15441	1.16694	1.20461	1.14421	1.08829	1.23317
145595477	cellobiase	Salinispora tropica CNB-440	Carbon Cycling	Carbon degradation	Cellulose	superkingdom:Bacteria;phylum:Actinobacteria;class:Actinobacteria;order:Actinomycetales;family:Micromonosporaceae;genus:Salinispora;species:Salinispora tropica;	0.940242	0.965206	0.970396	1.12279	0.989828	1.02379	0.941708	1.02526	0.97658
145302229	cellobiase	Salinispora tropica CNB-440	Carbon Cycling	Carbon degradation	Cellulose	superkingdom:Bacteria;phylum:Actinobacteria;class:Actinobacteria;order:Actinomycetales;family:Micromonosporaceae;genus:Salinispora;species:Salinispora tropica;	1.01756	0.989374	0.941703	0.966098	0.994469	1.01141	1.01495	0.868018	1.02661
145303444	cellobiase	Salinispora tropica CNB-440	Carbon Cycling	Carbon degradation	Cellulose	superkingdom:Bacteria;phylum:Actinobacteria;class:Actinobacteria;order:Actinomycetales;family:Micromonosporaceae;genus:Salinispora;species:Salinispora tropica;	0.932696	0.932644	1.02293	0.898883	0.929299	0.991885	0.960053	0.816354	0.97976
118170433	cellobiase	Mycobacterium smegmatis str. MC2 155	Carbon Cycling	Carbon degradation	Cellulose	superkingdom:Bacteria;phylum:Actinobacteria;class:Actinobacteria;order:Actinomycetales;family:Mycobacteriaceae;genus:Mycobacterium;species:Mycobacterium smegmatis;	0.927878	0.95996	0.922379	0.958071	0.927482	0.920902	0.889914	0.955223	0.962966
325554732	cellobiase	Rhodococcus equi ATCC 33707	Carbon Cycling	Carbon degradation	Cellulose	superkingdom:Bacteria;phylum:Actinobacteria;class:Actinobacteria;order:Actinomycetales;family:Nocardiaceae;genus:Rhodococcus;species:Rhodococcus equi;	0.963915	0.979292	0.965526	1.02664	0.91355	0.980599	0.963483	1.00023	0.949271
226185465	cellobiase	Rhodococcus erythropolis PR4	Carbon Cycling	Carbon degradation	Cellulose	superkingdom:Bacteria;phylum:Actinobacteria;class:Actinobacteria;order:Actinomycetales;family:Nocardiaceae;genus:Rhodococcus;species:Rhodococcus erythropolis;	0.969547	0.905109	0.994907	0.881536	1.07813	0.886374	0.960566	0.95512	0.950639
325952718	cellobiase	Nocardioidaceae bacterium Broad-1	Carbon Cycling	Carbon degradation	Cellulose	superkingdom:Bacteria;phylum:Actinobacteria;class:Actinobacteria;order:Actinomycetales;family:Nocardioidaceae;	1.10368	1.08424	1.08908	1.16318	1.0816	1.14659	1.09976	1.10969	1.1279
311312411	cellobiase	Aeromicrobium marinum DSM 15272	Carbon Cycling	Carbon degradation	Cellulose	superkingdom:Bacteria;phylum:Actinobacteria;class:Actinobacteria;order:Actinomycetales;family:Nocardioidaceae;genus:Aeromicrobium;species:Aeromicrobium marinum;	1.28672	1.2821	1.2967	1.38331	1.33816	1.34271	1.29677	1.33408	1.3264
283811139	cellobiase	Kribbella flavida DSM 17836	Carbon Cycling	Carbon degradation	Cellulose	superkingdom:Bacteria;phylum:Actinobacteria;class:Actinobacteria;order:Actinomycetales;family:Nocardioidaceae;genus:Kribbella;species:Kribbella flavida;	1.00223	0.998619	1.07468	1.0749	1.21699	1.09787	1.00687	0.937955	1.09628
227273366	cellobiase	Kribbella flavida DSM 17836	Carbon Cycling	Carbon degradation	Cellulose	superkingdom:Bacteria;phylum:Actinobacteria;class:Actinobacteria;order:Actinomycetales;family:Nocardioidaceae;genus:Kribbella;species:Kribbella flavida;	0.933286	0.922546	0.942185	0.959667	0.995919	0.989029	0.943956	0.804739	0.971592
71915762	cellobiase	Thermobifida fusca YX	Carbon Cycling	Carbon degradation	Cellulose	superkingdom:Bacteria;phylum:Actinobacteria;class:Actinobacteria;order:Actinomycetales;family:Nocardiopsaceae;genus:Thermobifida;species:Thermobifida fusca;	1.27914	1.31408	1.30314	1.42466	1.31423	1.34624	1.29269	1.36729	1.33593
334337748	cellobiase	Isoptericola variabilis 225	Carbon Cycling	Carbon degradation	Cellulose	superkingdom:Bacteria;phylum:Actinobacteria;class:Actinobacteria;order:Actinomycetales;family:Promicromonosporaceae;genus:Isoptericola;species:Isoptericola variabilis;	1.02592	1.07667	1.04548	1.16521	1.04214	1.08473	1.01252	1.11057	1.10171
269305905	cellobiase	Xylanimonas cellulosilytica DSM 15894	Carbon Cycling	Carbon degradation	Cellulose	superkingdom:Bacteria;phylum:Actinobacteria;class:Actinobacteria;order:Actinomycetales;family:Promicromonosporaceae;genus:Xylanimonas;species:Xylanimonas cellulosilytica;	1.11973	1.10898	1.12185	1.14008	1.01853	1.13701	1.09716	0.993879	1.14978
149828	cellobiase	NA	Carbon Cycling	Carbon degradation	Cellulose	superkingdom:Bacteria;phylum:Actinobacteria;class:Actinobacteria;order:Actinomycetales;family:Pseudonocardiaceae;genus:Thermobispora;	0.959989	0.921266	0.952906	0.980411	1.00859	0.973373	0.937329	0.79867	0.976679
269096354	cellobiase	Sanguibacter keddieii DSM 10542	Carbon Cycling	Carbon degradation	Cellulose	superkingdom:Bacteria;phylum:Actinobacteria;class:Actinobacteria;order:Actinomycetales;family:Sanguibacteraceae;genus:Sanguibacter;species:Sanguibacter keddieii;	1.11282	1.08784	1.09574	1.05632	1.11467	1.10969	1.07971	1.13495	1.05249
357387740	cellobiase	Kitasatospora setae KM-6054	Carbon Cycling	Carbon degradation	Cellulose	superkingdom:Bacteria;phylum:Actinobacteria;class:Actinobacteria;order:Actinomycetales;family:Streptomycetaceae;genus:Kitasatospora;species:Kitasatospora setae;	1.08267	1.07678	1.09183	1.11942	1.00312	1.08322	1.05853	1.05611	1.0986
194343579	cellobiase	Streptomyces sp. Mg1	Carbon Cycling	Carbon degradation	Cellulose	superkingdom:Bacteria;phylum:Actinobacteria;class:Actinobacteria;order:Actinomycetales;family:Streptomycetaceae;genus:Streptomyces;	1.22626	1.14641	1.11268	1.08753	1.14903	1.21368	1.2274	1.03438	1.248
345002816	cellobiase	Streptomyces sp. SirexAA-E	Carbon Cycling	Carbon degradation	Cellulose	superkingdom:Bacteria;phylum:Actinobacteria;class:Actinobacteria;order:Actinomycetales;family:Streptomycetaceae;genus:Streptomyces;	1.03023	0.969736	1.04972	0.94603	1.08319	0.950232	1.00161	0.997248	0.948247
344997949	cellobiase	Streptomyces sp. SirexAA-E	Carbon Cycling	Carbon degradation	Cellulose	superkingdom:Bacteria;phylum:Actinobacteria;class:Actinobacteria;order:Actinomycetales;family:Streptomycetaceae;genus:Streptomyces;	0.899515	0.882369	0.94547	0.919033	0.928868	0.90649	0.892093	0.917949	0.878234
302441493	cellobiase	Streptomyces sp. C	Carbon Cycling	Carbon degradation	Cellulose	superkingdom:Bacteria;phylum:Actinobacteria;class:Actinobacteria;order:Actinomycetales;family:Streptomycetaceae;genus:Streptomyces;	1.42837	1.40206	1.43136	1.44312	1.41466	1.41623	1.44068	1.18116	1.48551
365866368	cellobiase	Streptomyces sp. W007	Carbon Cycling	Carbon degradation	Cellulose	superkingdom:Bacteria;phylum:Actinobacteria;class:Actinobacteria;order:Actinomycetales;family:Streptomycetaceae;genus:Streptomyces;	0.955265	0.875645	1.00628	0.953308	1.03309	0.914965	0.878258	0.902001	0.932143
332748620	cellobiase	Streptomyces sp. Tu6071	Carbon Cycling	Carbon degradation	Cellulose	superkingdom:Bacteria;phylum:Actinobacteria;class:Actinobacteria;order:Actinomycetales;family:Streptomycetaceae;genus:Streptomyces;	0.944284	0.891948	0.900626	0.868117	1.02196	0.897879	0.902944	0.866437	0.914742
29608913	cellobiase	Streptomyces avermitilis MA-4680	Carbon Cycling	Carbon degradation	Cellulose	superkingdom:Bacteria;phylum:Actinobacteria;class:Actinobacteria;order:Actinomycetales;family:Streptomycetaceae;genus:Streptomyces;species:Streptomyces avermitilis;	0.974034	0.877856	0.9807	0.857487	0.940268	0.951743	0.954456	0.875915	0.87109
29832141	cellobiase	Streptomyces avermitilis MA-4680	Carbon Cycling	Carbon degradation	Cellulose	superkingdom:Bacteria;phylum:Actinobacteria;class:Actinobacteria;order:Actinomycetales;family:Streptomycetaceae;genus:Streptomyces;species:Streptomyces avermitilis;	0.790258	0.755681	NA	0.761858	NA	0.797992	NA	NA	NA
21220991	cellobiase	Streptomyces coelicolor A3(2)	Carbon Cycling	Carbon degradation	Cellulose	superkingdom:Bacteria;phylum:Actinobacteria;class:Actinobacteria;order:Actinomycetales;family:Streptomycetaceae;genus:Streptomyces;species:Streptomyces coelicolor;	1.03965	1.08187	1.06196	1.22247	1.03979	1.1088	1.01359	1.06101	1.07348
24413912	cellobiase	Streptomyces coelicolor A3(2)	Carbon Cycling	Carbon degradation	Cellulose	superkingdom:Bacteria;phylum:Actinobacteria;class:Actinobacteria;order:Actinomycetales;family:Streptomycetaceae;genus:Streptomyces;species:Streptomyces coelicolor;	1.10407	1.09239	1.11652	1.02569	1.15483	1.0035	1.0879	0.928747	1.11626
21221249	cellobiase	Streptomyces coelicolor A3(2)	Carbon Cycling	Carbon degradation	Cellulose	superkingdom:Bacteria;phylum:Actinobacteria;class:Actinobacteria;order:Actinomycetales;family:Streptomycetaceae;genus:Streptomyces;species:Streptomyces coelicolor;	1.0361	1.00017	1.01596	1.06293	1.00007	1.04666	1.01914	0.970598	1.04902
291449283	cellobiase	Streptomyces roseosporus NRRL 15998	Carbon Cycling	Carbon degradation	Cellulose	superkingdom:Bacteria;phylum:Actinobacteria;class:Actinobacteria;order:Actinomycetales;family:Streptomycetaceae;genus:Streptomyces;species:Streptomyces filamentosus;	0.932644	0.871518	0.978115	0.816255	0.910816	0.889526	0.984378	0.874939	0.800421
291448627	cellobiase	Streptomyces roseosporus NRRL 15998	Carbon Cycling	Carbon degradation	Cellulose	superkingdom:Bacteria;phylum:Actinobacteria;class:Actinobacteria;order:Actinomycetales;family:Streptomycetaceae;genus:Streptomyces;species:Streptomyces filamentosus;	NA	NA	NA	NA	0.728371	0.766392	NA	NA	NA
291444923	cellobiase	Streptomyces roseosporus NRRL 15998	Carbon Cycling	Carbon degradation	Cellulose	superkingdom:Bacteria;phylum:Actinobacteria;class:Actinobacteria;order:Actinomycetales;family:Streptomycetaceae;genus:Streptomyces;species:Streptomyces filamentosus;	1.04376	0.916237	0.991796	0.988828	1.07155	1.0638	0.983004	0.945893	1.0729
320007776	cellobiase	Streptomyces flavogriseus ATCC 33331	Carbon Cycling	Carbon degradation	Cellulose	superkingdom:Bacteria;phylum:Actinobacteria;class:Actinobacteria;order:Actinomycetales;family:Streptomycetaceae;genus:Streptomyces;species:Streptomyces flavogriseus;	0.939456	0.901411	0.9452	0.835683	1.07839	0.929029	0.91791	0.87609	0.839966
320008773	cellobiase	Streptomyces flavogriseus ATCC 33331	Carbon Cycling	Carbon degradation	Cellulose	superkingdom:Bacteria;phylum:Actinobacteria;class:Actinobacteria;order:Actinomycetales;family:Streptomycetaceae;genus:Streptomyces;species:Streptomyces flavogriseus;	1.03867	1.01066	1.0196	0.995416	0.984014	1.0217	1.00429	1.03035	0.977857
291338971	cellobiase	Streptomyces ghanaensis ATCC 14672	Carbon Cycling	Carbon degradation	Cellulose	superkingdom:Bacteria;phylum:Actinobacteria;class:Actinobacteria;order:Actinomycetales;family:Streptomycetaceae;genus:Streptomyces;species:Streptomyces ghanaensis;	0.878535	0.907632	0.885699	0.832185	0.855765	0.852214	0.870198	0.849111	0.831988
326655018	cellobiase	Streptomyces griseus XylebKG-1	Carbon Cycling	Carbon degradation	Cellulose	superkingdom:Bacteria;phylum:Actinobacteria;class:Actinobacteria;order:Actinomycetales;family:Streptomycetaceae;genus:Streptomyces;species:Streptomyces griseus;	1.028	1.04318	1.04623	1.11743	1.05296	1.05754	1.02558	1.09255	1.04883
182438531	cellobiase	Streptomyces griseus subsp. griseus NBRC 13350	Carbon Cycling	Carbon degradation	Cellulose	superkingdom:Bacteria;phylum:Actinobacteria;class:Actinobacteria;order:Actinomycetales;family:Streptomycetaceae;genus:Streptomyces;species:Streptomyces griseus;	0.90204	0.851472	0.885797	0.787388	0.919781	0.90006	0.847253	0.809156	0.892435
197718482	cellobiase	Streptomyces pristinaespiralis ATCC 25486	Carbon Cycling	Carbon degradation	Cellulose	superkingdom:Bacteria;phylum:Actinobacteria;class:Actinobacteria;order:Actinomycetales;family:Streptomycetaceae;genus:Streptomyces;species:Streptomyces pristinaespiralis;	1.06888	1.01821	1.00617	1.01999	0.979239	1.06187	0.980333	1.03725	0.929586
260651540	cellobiase	Streptomyces scabiei 87.22	Carbon Cycling	Carbon degradation	Cellulose	superkingdom:Bacteria;phylum:Actinobacteria;class:Actinobacteria;order:Actinomycetales;family:Streptomycetaceae;genus:Streptomyces;species:Streptomyces scabiei;	1.01151	0.938597	1.0121	1.02558	1.10691	0.971055	0.959227	0.920054	0.939169
290960156	cellobiase	Streptomyces scabiei 87.22	Carbon Cycling	Carbon degradation	Cellulose	superkingdom:Bacteria;phylum:Actinobacteria;class:Actinobacteria;order:Actinomycetales;family:Streptomycetaceae;genus:Streptomyces;species:Streptomyces scabiei;	1.01492	1.04701	1.03633	1.19145	1.06781	1.09124	1.02282	1.10562	1.04813
197710679	cellobiase	Streptomyces sviceus ATCC 29083	Carbon Cycling	Carbon degradation	Cellulose	superkingdom:Bacteria;phylum:Actinobacteria;class:Actinobacteria;order:Actinomycetales;family:Streptomycetaceae;genus:Streptomyces;species:Streptomyces sviceus;	1.11644	1.12246	1.11419	1.13896	1.10842	1.19022	1.06721	1.09542	1.11668
229760961	cellobiase	Streptosporangium roseum DSM 43021	Carbon Cycling	Carbon degradation	Cellulose	superkingdom:Bacteria;phylum:Actinobacteria;class:Actinobacteria;order:Actinomycetales;family:Streptosporangiaceae;genus:Streptosporangium;species:Streptosporangium roseum;	0.985493	0.850718	0.894029	0.881174	1.06991	0.973052	0.920672	0.860576	0.983907
229853077	cellobiase	Streptosporangium roseum DSM 43021	Carbon Cycling	Carbon degradation	Cellulose	superkingdom:Bacteria;phylum:Actinobacteria;class:Actinobacteria;order:Actinomycetales;family:Streptosporangiaceae;genus:Streptosporangium;species:Streptosporangium roseum;	0.99909	0.969215	0.981115	0.893632	0.971318	0.905358	0.952933	0.992462	0.947431
339478367	cellobiase	Bifidobacterium breve UCC2003	Carbon Cycling	Carbon degradation	Cellulose	superkingdom:Bacteria;phylum:Actinobacteria;class:Actinobacteria;order:Bifidobacteriales;family:Bifidobacteriaceae;genus:Bifidobacterium;species:Bifidobacterium breve;	1.02384	1.01803	1.07254	0.981392	1.03546	0.99483	0.972116	1.00621	1.00616
291381013	cellobiase	Bifidobacterium breve DSM 20213 = JCM 1192	Carbon Cycling	Carbon degradation	Cellulose	superkingdom:Bacteria;phylum:Actinobacteria;class:Actinobacteria;order:Bifidobacteriales;family:Bifidobacteriaceae;genus:Bifidobacterium;species:Bifidobacterium breve;	NA	NA	NA	0.752064	NA	0.83211	NA	NA	NA
283102490	cellobiase	Bifidobacterium dentium Bd1	Carbon Cycling	Carbon degradation	Cellulose	superkingdom:Bacteria;phylum:Actinobacteria;class:Actinobacteria;order:Bifidobacteriales;family:Bifidobacteriaceae;genus:Bifidobacterium;species:Bifidobacterium dentium;	0.879385	0.960858	0.905011	0.96244	0.918785	0.944681	0.891515	0.990316	0.926827
213524230	cellobiase	Bifidobacterium longum subsp. infantis ATCC 15697	Carbon Cycling	Carbon degradation	Cellulose	superkingdom:Bacteria;phylum:Actinobacteria;class:Actinobacteria;order:Bifidobacteriales;family:Bifidobacteriaceae;genus:Bifidobacterium;species:Bifidobacterium longum;	1.44103	1.42421	1.43924	1.50629	1.35094	1.44007	1.39132	1.37541	1.43347
315226375	cellobiase	Parascardovia denticolens DSM 10105 = JCM 12538	Carbon Cycling	Carbon degradation	Cellulose	superkingdom:Bacteria;phylum:Actinobacteria;class:Actinobacteria;order:Bifidobacteriales;family:Bifidobacteriaceae;genus:Parascardovia;species:Parascardovia denticolens;	0.835693	0.85238	0.838401	0.813377	0.807466	0.832696	0.773474	0.80143	0.872978
210627070	cellobiase	Collinsella intestinalis DSM 13280	Carbon Cycling	Carbon degradation	Cellulose	superkingdom:Bacteria;phylum:Actinobacteria;class:Actinobacteria;order:Coriobacteriales;family:Coriobacteriaceae;genus:Collinsella;species:Collinsella intestinalis;	1.10414	1.0788	1.11264	1.11806	1.05382	1.10678	1.09665	1.10128	1.15261
210632294	cellobiase	Collinsella stercoris DSM 13279	Carbon Cycling	Carbon degradation	Cellulose	superkingdom:Bacteria;phylum:Actinobacteria;class:Actinobacteria;order:Coriobacteriales;family:Coriobacteriaceae;genus:Collinsella;species:Collinsella stercoris;	1.01747	0.989659	1.01205	1.06751	1.05323	1.06081	1.03158	1.09524	1.04924
210634074	cellobiase	Collinsella stercoris DSM 13279	Carbon Cycling	Carbon degradation	Cellulose	superkingdom:Bacteria;phylum:Actinobacteria;class:Actinobacteria;order:Coriobacteriales;family:Coriobacteriaceae;genus:Collinsella;species:Collinsella stercoris;	0.836309	0.822959	0.837724	0.846674	0.791551	0.838599	0.756904	0.876166	0.837228
210630336	cellobiase	Collinsella stercoris DSM 13279	Carbon Cycling	Carbon degradation	Cellulose	superkingdom:Bacteria;phylum:Actinobacteria;class:Actinobacteria;order:Coriobacteriales;family:Coriobacteriaceae;genus:Collinsella;species:Collinsella stercoris;	1.10171	1.08089	1.08408	1.02411	1.11527	1.07555	1.0605	0.791078	1.10968
210631468	cellobiase	Collinsella stercoris DSM 13279	Carbon Cycling	Carbon degradation	Cellulose	superkingdom:Bacteria;phylum:Actinobacteria;class:Actinobacteria;order:Coriobacteriales;family:Coriobacteriaceae;genus:Collinsella;species:Collinsella stercoris;	1.10619	1.07132	1.08932	1.1515	1.13128	1.1153	1.113	1.02329	1.14592
210159617	cellobiase	Collinsella stercoris DSM 13279	Carbon Cycling	Carbon degradation	Cellulose	superkingdom:Bacteria;phylum:Actinobacteria;class:Actinobacteria;order:Coriobacteriales;family:Coriobacteriaceae;genus:Collinsella;species:Collinsella stercoris;	1.14064	1.13297	1.19584	1.11653	1.15874	1.22527	1.21183	1.14606	1.07734
255038613	cellobiase	Dyadobacter fermentans DSM 18053	Carbon Cycling	Carbon degradation	Cellulose	superkingdom:Bacteria;phylum:Bacteroidetes;class:Cytophagia;order:Cytophagales;family:Cytophagaceae;genus:Dyadobacter;species:Dyadobacter fermentans;	1.04968	1.03308	1.03994	1.09941	1.08038	1.1039	1.02513	1.04188	1.04495
284040305	cellobiase	Spirosoma linguale DSM 74	Carbon Cycling	Carbon degradation	Cellulose	superkingdom:Bacteria;phylum:Bacteroidetes;class:Cytophagia;order:Cytophagales;family:Cytophagaceae;genus:Spirosoma;species:Spirosoma linguale;	0.801291	NA	0.797326	0.751019	0.759545	0.796245	0.786968	0.8371	NA
284036809	cellobiase	Spirosoma linguale DSM 74	Carbon Cycling	Carbon degradation	Cellulose	superkingdom:Bacteria;phylum:Bacteroidetes;class:Cytophagia;order:Cytophagales;family:Cytophagaceae;genus:Spirosoma;species:Spirosoma linguale;	0.979132	1.02486	1.02138	1.12313	1.01475	1.04557	1.03546	1.08383	1.04823
146157002	cellobiase	Flavobacterium johnsoniae UW101	Carbon Cycling	Carbon degradation	Cellulose	superkingdom:Bacteria;phylum:Bacteroidetes;class:Flavobacteriia;order:Flavobacteriales;family:Flavobacteriaceae;genus:Flavobacterium;species:Flavobacterium johnsoniae;	0.813466	0.781345	0.801503	0.868608	0.812592	0.845955	0.791097	0.854484	0.804026
339732360	cellobiase	Zobellia galactanivorans	Carbon Cycling	Carbon degradation	Cellulose	superkingdom:Bacteria;phylum:Bacteroidetes;class:Flavobacteriia;order:Flavobacteriales;family:Flavobacteriaceae;genus:Zobellia;	0.938985	0.915442	0.933691	0.986596	0.964871	0.936893	0.936166	0.970566	0.96709
294982509	cellobiase	Zunongwangia profunda SM-A87	Carbon Cycling	Carbon degradation	Cellulose	superkingdom:Bacteria;phylum:Bacteroidetes;class:Flavobacteriia;order:Flavobacteriales;family:Flavobacteriaceae;genus:Zunongwangia;species:Zunongwangia profunda;	0.838705	0.866961	0.860564	0.818688	0.789557	0.783797	0.833817	0.882913	0.806305
326801334	cellobiase	Sphingobacterium sp. 21	Carbon Cycling	Carbon degradation	Cellulose	superkingdom:Bacteria;phylum:Bacteroidetes;class:Sphingobacteriia;order:Sphingobacteriales;family:Sphingobacteriaceae;genus:Sphingobacterium;	0.849313	0.941913	0.910049	0.959561	0.831761	0.758671	0.888455	0.967116	0.90251
256420882	cellobiase	Chitinophaga pinensis DSM 2588	Carbon Cycling	Carbon degradation	Cellulose	superkingdom:Bacteria;phylum:Bacteroidetes;class:Sphingobacteriia;order:Sphingobacteriales;genus:Chitinophaga;species:Chitinophaga pinensis;	1.00526	0.833754	0.919574	0.854934	1.07673	0.962047	0.893964	0.867985	0.830249
320160524	cellobiase	Anaerolinea thermophila UNI-1	Carbon Cycling	Carbon degradation	Cellulose	superkingdom:Bacteria;phylum:Chloroflexi;class:Anaerolineae;order:Anaerolineales;family:Anaerolineaceae;genus:Anaerolinea;species:Anaerolinea thermophila;	0.824594	NA	0.794493	0.723412	NA	0.78243	0.778102	NA	0.767347
383760988	cellobiase	Caldilinea aerophila DSM 14535 = NBRC 104270	Carbon Cycling	Carbon degradation	Cellulose	superkingdom:Bacteria;phylum:Chloroflexi;class:Caldilineae;order:Caldilineales;family:Caldilineaceae;genus:Caldilinea;species:Caldilinea aerophila;	0.939259	0.937911	0.936767	0.91644	0.863555	0.976981	0.929583	0.945383	0.909221
163847112	cellobiase	Chloroflexus aurantiacus J-10-fl	Carbon Cycling	Carbon degradation	Cellulose	superkingdom:Bacteria;phylum:Chloroflexi;class:Chloroflexi;order:Chloroflexales;family:Chloroflexaceae;genus:Chloroflexus;species:Chloroflexus aurantiacus;	0.923679	0.922303	0.915721	1.00694	0.938753	0.967426	0.925595	0.963981	0.955333
156740540	cellobiase	Roseiflexus castenholzii DSM 13941	Carbon Cycling	Carbon degradation	Cellulose	superkingdom:Bacteria;phylum:Chloroflexi;class:Chloroflexi;order:Chloroflexales;family:Chloroflexaceae;genus:Roseiflexus;species:Roseiflexus castenholzii;	1.21036	1.20588	1.21099	1.22479	1.13581	1.21032	1.19092	1.118	1.21578
269785788	cellobiase	Sphaerobacter thermophilus DSM 20745	Carbon Cycling	Carbon degradation	Cellulose	superkingdom:Bacteria;phylum:Chloroflexi;class:Thermomicrobia;order:Sphaerobacterales;family:Sphaerobacteraceae;genus:Sphaerobacter;species:Sphaerobacter thermophilus;	0.882271	NA	0.817267	NA	0.966056	0.803052	NA	NA	NA
221633731	cellobiase	Thermomicrobium roseum DSM 5159	Carbon Cycling	Carbon degradation	Cellulose	superkingdom:Bacteria;phylum:Chloroflexi;class:Thermomicrobia;order:Thermomicrobiales;family:Thermomicrobiaceae;genus:Thermomicrobium;species:Thermomicrobium roseum;	0.785758	NA	0.785167	0.804623	0.738814	0.810921	NA	0.802013	0.761155
158306174	cellobiase	Acaryochloris marina MBIC11017	Carbon Cycling	Carbon degradation	Cellulose	superkingdom:Bacteria;phylum:Cyanobacteria;order:Chroococcales;genus:Acaryochloris;species:Acaryochloris marina;	0.990724	0.982932	1.00753	0.949423	0.979114	0.944478	0.962991	1.05624	0.950174
186682620	cellobiase	Nostoc punctiforme PCC 73102	Carbon Cycling	Carbon degradation	Cellulose	superkingdom:Bacteria;phylum:Cyanobacteria;order:Nostocales;family:Nostocaceae;genus:Nostoc;species:Nostoc punctiforme;	1.0299	1.03539	1.04468	1.04727	1.06817	0.992764	1.04795	0.946919	1.09199
226316856	cellobiase	Deinococcus deserti VCD115	Carbon Cycling	Carbon degradation	Cellulose	superkingdom:Bacteria;phylum:Deinococcus-Thermus;class:Deinococci;order:Deinococcales;family:Deinococcaceae;genus:Deinococcus;species:Deinococcus deserti;	1.02613	0.910206	0.915143	0.70249	1.05084	1.00287	0.987954	0.89347	1.04304
94554376	cellobiase	Deinococcus geothermalis DSM 11300	Carbon Cycling	Carbon degradation	Cellulose	superkingdom:Bacteria;phylum:Deinococcus-Thermus;class:Deinococci;order:Deinococcales;family:Deinococcaceae;genus:Deinococcus;species:Deinococcus geothermalis;	1.22075	1.19009	1.2294	1.2164	1.2555	1.21133	1.2246	1.0467	1.2476
217337278	cellobiase	Dictyoglomus turgidum DSM 6724	Carbon Cycling	Carbon degradation	Cellulose	superkingdom:Bacteria;phylum:Dictyoglomi;class:Dictyoglomia;order:Dictyoglomales;family:Dictyoglomaceae;genus:Dictyoglomus;species:Dictyoglomus turgidum;	0.975739	0.925323	0.938696	0.953905	0.977552	1.01858	0.966916	0.814442	0.983783
73698632	cellobiase	Alicyclobacillus acidocaldarius	Carbon Cycling	Carbon degradation	Cellulose	superkingdom:Bacteria;phylum:Firmicutes;class:Bacilli;order:Bacillales;family:Alicyclobacillaceae;genus:Alicyclobacillus;	1.12759	1.10669	1.12803	1.11966	1.14024	1.10432	1.11136	0.972776	1.15783
212561662	cellobiase	Anoxybacillus flavithermus WK1	Carbon Cycling	Carbon degradation	Cellulose	superkingdom:Bacteria;phylum:Firmicutes;class:Bacilli;order:Bacillales;family:Bacillaceae;genus:Anoxybacillus;species:Anoxybacillus flavithermus;	0.744424	0.790567	0.79306	0.838758	0.742389	0.795364	NA	0.813664	0.80969
142586	cellobiase	NA	Carbon Cycling	Carbon degradation	Cellulose	superkingdom:Bacteria;phylum:Firmicutes;class:Bacilli;order:Bacillales;family:Bacillaceae;genus:Bacillus;species:Bacillus circulans;	1.00421	1.01654	1.00225	1.08759	0.993999	1.03713	0.964355	1.00536	1.01668
56908498	cellobiase	Bacillus clausii KSM-K16	Carbon Cycling	Carbon degradation	Cellulose	superkingdom:Bacteria;phylum:Firmicutes;class:Bacilli;order:Bacillales;family:Bacillaceae;genus:Bacillus;species:Bacillus clausii;	0.824372	NA	0.841822	0.718233	0.881803	NA	NA	0.794153	0.791545
56962095	cellobiase	Bacillus clausii KSM-K16	Carbon Cycling	Carbon degradation	Cellulose	superkingdom:Bacteria;phylum:Firmicutes;class:Bacilli;order:Bacillales;family:Bacillaceae;genus:Bacillus;species:Bacillus clausii;	0.794652	0.758949	NA	0.803751	0.79961	0.788811	0.798378	NA	0.789671
52350378	cellobiase	Bacillus licheniformis DSM 13	Carbon Cycling	Carbon degradation	Cellulose	superkingdom:Bacteria;phylum:Firmicutes;class:Bacilli;order:Bacillales;family:Bacillaceae;genus:Bacillus;species:Bacillus licheniformis;	0.961451	0.960091	0.924262	0.847539	1.00437	0.945024	0.911104	0.78413	0.945876
52787891	cellobiase	Bacillus licheniformis ATCC 14580	Carbon Cycling	Carbon degradation	Cellulose	superkingdom:Bacteria;phylum:Firmicutes;class:Bacilli;order:Bacillales;family:Bacillaceae;genus:Bacillus;species:Bacillus licheniformis;	0.963707	0.941394	0.952714	0.972039	0.938893	0.983183	0.940783	0.948514	0.949919
194011822b	cellobiase	Bacillus pumilus ATCC 7061	Carbon Cycling	Carbon degradation	Cellulose	superkingdom:Bacteria;phylum:Firmicutes;class:Bacilli;order:Bacillales;family:Bacillaceae;genus:Bacillus;species:Bacillus pumilus;	NA	NA	NA	NA	0.751987	0.777444	0.766525	NA	0.78648
196249146	cellobiase	Geobacillus sp. G11MC16	Carbon Cycling	Carbon degradation	Cellulose	superkingdom:Bacteria;phylum:Firmicutes;class:Bacilli;order:Bacillales;family:Bacillaceae;genus:Geobacillus;	1.07423	1.05129	1.07667	1.08832	1.04391	1.04299	1.05718	1.10065	1.07685
138895907	cellobiase	Geobacillus thermodenitrificans NG80-2	Carbon Cycling	Carbon degradation	Cellulose	superkingdom:Bacteria;phylum:Firmicutes;class:Bacilli;order:Bacillales;family:Bacillaceae;genus:Geobacillus;species:Geobacillus thermodenitrificans;	0.805714	0.793951	0.792099	0.8152	0.81298	0.824779	0.842132	0.864005	0.815098
138896772	cellobiase	Geobacillus thermodenitrificans NG80-2	Carbon Cycling	Carbon degradation	Cellulose	superkingdom:Bacteria;phylum:Firmicutes;class:Bacilli;order:Bacillales;family:Bacillaceae;genus:Geobacillus;species:Geobacillus thermodenitrificans;	1.02726	0.912128	0.976099	0.874862	1.04766	0.991897	1.02093	0.924244	0.944928
299816756	cellobiase	Listeria grayi DSM 20601	Carbon Cycling	Carbon degradation	Cellulose	superkingdom:Bacteria;phylum:Firmicutes;class:Bacilli;order:Bacillales;family:Listeriaceae;genus:Listeria;species:Listeria grayi;	0.811257	0.841598	0.792296	NA	0.787997	0.843809	0.768963	0.841977	0.803523
299816789	cellobiase	Listeria grayi DSM 20601	Carbon Cycling	Carbon degradation	Cellulose	superkingdom:Bacteria;phylum:Firmicutes;class:Bacilli;order:Bacillales;family:Listeriaceae;genus:Listeria;species:Listeria grayi;	0.832736	0.818823	0.784614	0.771007	0.779214	0.81598	0.776815	NA	0.802888
299816744	cellobiase	Listeria grayi DSM 20601	Carbon Cycling	Carbon degradation	Cellulose	superkingdom:Bacteria;phylum:Firmicutes;class:Bacilli;order:Bacillales;family:Listeriaceae;genus:Listeria;species:Listeria grayi;	0.903024	NA	0.861137	0.766769	0.916144	0.840355	0.80291	0.883641	0.792324
346981053	cellobiase	Listeria ivanovii subsp. ivanovii PAM 55	Carbon Cycling	Carbon degradation	Cellulose	superkingdom:Bacteria;phylum:Firmicutes;class:Bacilli;order:Bacillales;family:Listeriaceae;genus:Listeria;species:Listeria ivanovii;	0.816371	0.850892	0.842817	0.9003	0.799458	0.843376	NA	0.916747	0.835891
375077740	cellobiase	Paenibacillus sp. Aloe-11	Carbon Cycling	Carbon degradation	Cellulose	superkingdom:Bacteria;phylum:Firmicutes;class:Bacilli;order:Bacillales;family:Paenibacillaceae;genus:Paenibacillus;	0.924464	0.929885	0.915294	0.995031	0.944219	0.971553	0.915259	1.02716	0.951128
375078949	cellobiase	Paenibacillus sp. Aloe-11	Carbon Cycling	Carbon degradation	Cellulose	superkingdom:Bacteria;phylum:Firmicutes;class:Bacilli;order:Bacillales;family:Paenibacillaceae;genus:Paenibacillus;	0.915206	0.907994	0.908698	0.912045	0.844725	0.995991	0.945066	0.903934	0.919607
375081426	cellobiase	Paenibacillus sp. Aloe-11	Carbon Cycling	Carbon degradation	Cellulose	superkingdom:Bacteria;phylum:Firmicutes;class:Bacilli;order:Bacillales;family:Paenibacillaceae;genus:Paenibacillus;	0.857299	0.839727	0.797469	0.797365	0.844058	0.879869	0.888895	NA	0.881836
82940947	cellobiase	Paenibacillus sp. HC1	Carbon Cycling	Carbon degradation	Cellulose	superkingdom:Bacteria;phylum:Firmicutes;class:Bacilli;order:Bacillales;family:Paenibacillaceae;genus:Paenibacillus;	0.769011	0.771041	0.783966	0.796299	0.799926	0.791995	0.805573	NA	0.829443
354584570	cellobiase	Paenibacillus lactis 154	Carbon Cycling	Carbon degradation	Cellulose	superkingdom:Bacteria;phylum:Firmicutes;class:Bacilli;order:Bacillales;family:Paenibacillaceae;genus:Paenibacillus;species:Paenibacillus lactis;	0.935341	0.915368	0.926747	0.956176	0.954931	0.962157	0.926328	0.861697	0.980301
305860704	cellobiase	Paenibacillus polymyxa E681	Carbon Cycling	Carbon degradation	Cellulose	superkingdom:Bacteria;phylum:Firmicutes;class:Bacilli;order:Bacillales;family:Paenibacillaceae;genus:Paenibacillus;species:Paenibacillus polymyxa;	0.838726	0.837221	0.826542	0.833353	0.791394	0.908077	0.794072	0.828729	0.790525
73661434	cellobiase	Staphylococcus saprophyticus subsp. saprophyticus ATCC 15305	Carbon Cycling	Carbon degradation	Cellulose	superkingdom:Bacteria;phylum:Firmicutes;class:Bacilli;order:Bacillales;family:Staphylococcaceae;genus:Staphylococcus;species:Staphylococcus saprophyticus;	0.766139	NA	0.756191	NA	0.762429	0.768858	0.781443	NA	0.792891
229917905	cellobiase	Exiguobacterium sp. AT1b	Carbon Cycling	Carbon degradation	Cellulose	superkingdom:Bacteria;phylum:Firmicutes;class:Bacilli;order:Bacillales;genus:Exiguobacterium;	0.908048	0.896518	0.819407	0.731956	0.913891	0.912507	0.8807	NA	0.905601
187483925	cellobiase	Exiguobacterium sp. AT1b	Carbon Cycling	Carbon degradation	Cellulose	superkingdom:Bacteria;phylum:Firmicutes;class:Bacilli;order:Bacillales;genus:Exiguobacterium;	1.06086	1.0679	1.09159	1.16003	1.10703	1.10249	1.06123	1.08805	1.10583
262093032	cellobiase	Exiguobacterium sp. A011	Carbon Cycling	Carbon degradation	Cellulose	superkingdom:Bacteria;phylum:Firmicutes;class:Bacilli;order:Bacillales;genus:Exiguobacterium;	0.775288	NA	0.763968	0.8881	0.757822	0.893074	0.783517	NA	0.897751
229469033	cellobiase	Exiguobacterium sp. AT1b	Carbon Cycling	Carbon degradation	Cellulose	superkingdom:Bacteria;phylum:Firmicutes;class:Bacilli;order:Bacillales;genus:Exiguobacterium;	0.809869	0.809717	0.80513	0.90984	0.814333	0.862623	0.803415	0.846901	0.840473
257865313	cellobiase	Enterococcus casseliflavus EC30	Carbon Cycling	Carbon degradation	Cellulose	superkingdom:Bacteria;phylum:Firmicutes;class:Bacilli;order:Lactobacillales;family:Enterococcaceae;genus:Enterococcus;species:Enterococcus casseliflavus;	NA	NA	NA	0.757982	0.75982	0.741512	NA	NA	NA
257080368	cellobiase	Enterococcus faecalis E1Sol	Carbon Cycling	Carbon degradation	Cellulose	superkingdom:Bacteria;phylum:Firmicutes;class:Bacilli;order:Lactobacillales;family:Enterococcaceae;genus:Enterococcus;species:Enterococcus faecalis;	0.834973	0.83547	NA	0.679608	0.789194	0.785101	0.780423	NA	0.831596
257805588	cellobiase	Enterococcus gallinarum EG2	Carbon Cycling	Carbon degradation	Cellulose	superkingdom:Bacteria;phylum:Firmicutes;class:Bacilli;order:Lactobacillales;family:Enterococcaceae;genus:Enterococcus;species:Enterococcus gallinarum;	0.87497	0.908528	0.851134	0.911138	0.865083	0.891524	0.838515	0.923757	0.902831
227888950	cellobiase	Lactobacillus johnsonii ATCC 33200	Carbon Cycling	Carbon degradation	Cellulose	superkingdom:Bacteria;phylum:Firmicutes;class:Bacilli;order:Lactobacillales;family:Lactobacillaceae;genus:Lactobacillus;species:Lactobacillus johnsonii;	0.93185	0.938098	0.919712	0.925123	0.950324	0.961539	0.945629	0.949853	0.95196
239630501	cellobiase	Lactobacillus paracasei subsp. paracasei 8700:2	Carbon Cycling	Carbon degradation	Cellulose	superkingdom:Bacteria;phylum:Firmicutes;class:Bacilli;order:Lactobacillales;family:Lactobacillaceae;genus:Lactobacillus;species:Lactobacillus paracasei;	0.884036	0.888703	0.882471	0.931507	0.91833	0.932471	0.868454	0.900208	0.882185
339638305	cellobiase	Lactobacillus pentosus IG1	Carbon Cycling	Carbon degradation	Cellulose	superkingdom:Bacteria;phylum:Firmicutes;class:Bacilli;order:Lactobacillales;family:Lactobacillaceae;genus:Lactobacillus;species:Lactobacillus pentosus;	0.817753	NA	0.813775	0.742233	0.782956	0.777558	NA	0.834572	0.764449
345283701	cellobiase	Lactobacillus ruminis ATCC 27782	Carbon Cycling	Carbon degradation	Cellulose	superkingdom:Bacteria;phylum:Firmicutes;class:Bacilli;order:Lactobacillales;family:Lactobacillaceae;genus:Lactobacillus;species:Lactobacillus ruminis;	0.986542	0.951521	0.975457	1.02489	0.958328	0.962248	0.962474	0.995518	1.00978
81429144	cellobiase	Lactobacillus sakei subsp. sakei 23K	Carbon Cycling	Carbon degradation	Cellulose	superkingdom:Bacteria;phylum:Firmicutes;class:Bacilli;order:Lactobacillales;family:Lactobacillaceae;genus:Lactobacillus;species:Lactobacillus sakei;	0.947813	0.921931	0.913667	0.931046	0.905091	0.959169	0.942298	0.888226	0.966367
270290514	cellobiase	Pediococcus acidilactici 7_4	Carbon Cycling	Carbon degradation	Cellulose	superkingdom:Bacteria;phylum:Firmicutes;class:Bacilli;order:Lactobacillales;family:Lactobacillaceae;genus:Pediococcus;species:Pediococcus acidilactici;	0.89018	0.896538	0.897737	0.972772	0.90674	0.949963	0.887698	0.929643	0.920089
372323953	cellobiase	Oenococcus kitaharae DSM 17330	Carbon Cycling	Carbon degradation	Cellulose	superkingdom:Bacteria;phylum:Firmicutes;class:Bacilli;order:Lactobacillales;family:Leuconostocaceae;genus:Oenococcus;species:Oenococcus kitaharae;	0.89575	0.963815	0.922189	0.984244	0.850289	0.96741	0.914076	0.913867	0.939963
343179969	cellobiase	Lactococcus garvieae ATCC 49156	Carbon Cycling	Carbon degradation	Cellulose	superkingdom:Bacteria;phylum:Firmicutes;class:Bacilli;order:Lactobacillales;family:Streptococcaceae;genus:Lactococcus;species:Lactococcus garvieae;	0.963649	0.951487	0.989443	0.873096	0.986179	0.866324	0.945955	0.965791	0.883994
195975313	cellobiase	Streptococcus equi subsp. zooepidemicus MGCS10565	Carbon Cycling	Carbon degradation	Cellulose	superkingdom:Bacteria;phylum:Firmicutes;class:Bacilli;order:Lactobacillales;family:Streptococcaceae;genus:Streptococcus;species:Streptococcus equi;	0.915477	0.935756	0.931197	0.996693	0.931166	0.988449	0.896626	1.00744	0.957772
334279522	cellobiase	Streptococcus gallolyticus subsp. gallolyticus ATCC 43143	Carbon Cycling	Carbon degradation	Cellulose	superkingdom:Bacteria;phylum:Firmicutes;class:Bacilli;order:Lactobacillales;family:Streptococcaceae;genus:Streptococcus;species:Streptococcus gallolyticus;	0.849165	0.843231	0.866529	0.826316	0.830892	0.890958	0.834329	0.841089	0.850975
379705167	cellobiase	Streptococcus infantarius subsp. infantarius CJ18	Carbon Cycling	Carbon degradation	Cellulose	superkingdom:Bacteria;phylum:Firmicutes;class:Bacilli;order:Lactobacillales;family:Streptococcaceae;genus:Streptococcus;species:Streptococcus infantarius;	0.947466	0.870938	0.992877	0.970397	0.968361	1.02744	0.938049	0.885246	1.02616
239517161	cellobiase	Clostridiales bacterium 1_7_47FAA	Carbon Cycling	Carbon degradation	Cellulose	superkingdom:Bacteria;phylum:Firmicutes;class:Clostridia;order:Clostridiales;	0.794971	0.768294	0.766662	NA	NA	NA	0.801911	0.807352	0.751315
324033466	cellobiase	Clostridium sp. D5	Carbon Cycling	Carbon degradation	Cellulose	superkingdom:Bacteria;phylum:Firmicutes;class:Clostridia;order:Clostridiales;family:Clostridiaceae;genus:Clostridium;	0.771864	NA	0.819549	0.714113	0.779089	0.764453	NA	0.786239	0.791681
325507798	cellobiase	Clostridium acetobutylicum EA 2018	Carbon Cycling	Carbon degradation	Cellulose	superkingdom:Bacteria;phylum:Firmicutes;class:Clostridia;order:Clostridiales;family:Clostridiaceae;genus:Clostridium;species:Clostridium acetobutylicum;	0.976645	1.00042	0.981177	1.04712	1.01614	0.990694	0.993954	1.01799	1.00601
336293620	cellobiase	Clostridium acetobutylicum DSM 1731	Carbon Cycling	Carbon degradation	Cellulose	superkingdom:Bacteria;phylum:Firmicutes;class:Clostridia;order:Clostridiales;family:Clostridiaceae;genus:Clostridium;species:Clostridium acetobutylicum;	0.925869	0.894507	0.9121	0.988057	0.930632	1.01013	0.899436	0.969783	0.966026
225042543	cellobiase	Clostridium asparagiforme DSM 15981	Carbon Cycling	Carbon degradation	Cellulose	superkingdom:Bacteria;phylum:Firmicutes;class:Clostridia;order:Clostridiales;family:Clostridiaceae;genus:Clostridium;species:Clostridium asparagiforme;	1.28003	1.19858	1.24769	1.16761	1.36159	1.31221	1.20781	1.20516	1.18592
225407908	cellobiase	Clostridium asparagiforme DSM 15981	Carbon Cycling	Carbon degradation	Cellulose	superkingdom:Bacteria;phylum:Firmicutes;class:Clostridia;order:Clostridiales;family:Clostridiaceae;genus:Clostridium;species:Clostridium asparagiforme;	0.802299	NA	0.859114	NA	NA	NA	0.809058	0.784598	0.773293
225041717	cellobiase	Clostridium asparagiforme DSM 15981	Carbon Cycling	Carbon degradation	Cellulose	superkingdom:Bacteria;phylum:Firmicutes;class:Clostridia;order:Clostridiales;family:Clostridiaceae;genus:Clostridium;species:Clostridium asparagiforme;	1.00539	0.824268	0.9362	0.784251	1.01673	0.771148	0.873862	0.877832	0.926555
225042544	cellobiase	Clostridium asparagiforme DSM 15981	Carbon Cycling	Carbon degradation	Cellulose	superkingdom:Bacteria;phylum:Firmicutes;class:Clostridia;order:Clostridiales;family:Clostridiaceae;genus:Clostridium;species:Clostridium asparagiforme;	0.984589	0.890501	0.963062	0.920586	0.961294	0.859795	0.914483	0.892768	0.879839
225387560	cellobiase	Clostridium asparagiforme DSM 15981	Carbon Cycling	Carbon degradation	Cellulose	superkingdom:Bacteria;phylum:Firmicutes;class:Clostridia;order:Clostridiales;family:Clostridiaceae;genus:Clostridium;species:Clostridium asparagiforme;	1.05273	1.12477	1.13839	1.08937	1.01287	1.08388	1.08148	1.0717	1.04764
288868854	cellobiase	Clostridium hathewayi DSM 13479	Carbon Cycling	Carbon degradation	Cellulose	superkingdom:Bacteria;phylum:Firmicutes;class:Clostridia;order:Clostridiales;family:Clostridiaceae;genus:Clostridium;species:Clostridium hathewayi;	0.889375	0.875465	0.872595	0.891165	0.920713	0.901801	0.895141	0.822438	0.919849
266623081	cellobiase	Clostridium hathewayi DSM 13479	Carbon Cycling	Carbon degradation	Cellulose	superkingdom:Bacteria;phylum:Firmicutes;class:Clostridia;order:Clostridiales;family:Clostridiaceae;genus:Clostridium;species:Clostridium hathewayi;	0.885708	0.916594	0.878819	0.965256	0.904287	0.927158	0.866438	0.887586	0.945821
288868705	cellobiase	Clostridium hathewayi DSM 13479	Carbon Cycling	Carbon degradation	Cellulose	superkingdom:Bacteria;phylum:Firmicutes;class:Clostridia;order:Clostridiales;family:Clostridiaceae;genus:Clostridium;species:Clostridium hathewayi;	NA	NA	NA	0.736606	0.78285	NA	NA	NA	NA
288867669	cellobiase	Clostridium hathewayi DSM 13479	Carbon Cycling	Carbon degradation	Cellulose	superkingdom:Bacteria;phylum:Firmicutes;class:Clostridia;order:Clostridiales;family:Clostridiaceae;genus:Clostridium;species:Clostridium hathewayi;	0.897133	0.86663	0.877509	0.939668	0.913753	0.930494	0.88868	0.927185	0.934582
302388172	cellobiase	Clostridium saccharolyticum WM1	Carbon Cycling	Carbon degradation	Cellulose	superkingdom:Bacteria;phylum:Firmicutes;class:Clostridia;order:Clostridiales;family:Clostridiaceae;genus:Clostridium;species:Clostridium saccharolyticum;	NA	NA	NA	NA	0.74712	0.790494	NA	NA	NA
51892092	cellobiase	Symbiobacterium thermophilum IAM 14863	Carbon Cycling	Carbon degradation	Cellulose	superkingdom:Bacteria;phylum:Firmicutes;class:Clostridia;order:Clostridiales;family:Clostridiales Family XVIII. Incertae Sedis;genus:Symbiobacterium;species:Symbiobacterium thermophilum;	1.21597	1.2508	1.23703	1.38951	1.25381	1.30319	1.22282	1.29733	1.24519
255284382	cellobiase	Bryantella formatexigens DSM 14469	Carbon Cycling	Carbon degradation	Cellulose	superkingdom:Bacteria;phylum:Firmicutes;class:Clostridia;order:Clostridiales;family:Lachnospiraceae;genus:Marvinbryantia;species:Marvinbryantia formatexigens;	1.03771	0.864496	0.858726	0.969469	1.059	1.03905	0.990559	0.840116	1.05721
315470386	cellobiase	Ethanoligenens harbinense YUAN-3	Carbon Cycling	Carbon degradation	Cellulose	superkingdom:Bacteria;phylum:Firmicutes;class:Clostridia;order:Clostridiales;family:Ruminococcaceae;genus:Ethanoligenens;species:Ethanoligenens harbinense;	0.9513	0.957655	0.964504	0.946843	0.885686	0.977733	0.932993	0.948913	0.926608
261367998	cellobiase	Subdoligranulum variabile DSM 15176	Carbon Cycling	Carbon degradation	Cellulose	superkingdom:Bacteria;phylum:Firmicutes;class:Clostridia;order:Clostridiales;family:Ruminococcaceae;genus:Subdoligranulum;species:Subdoligranulum variabile;	1.24028	1.20684	1.24026	1.24604	1.19544	1.21247	1.246	1.04264	1.27926
282600764	cellobiase	Subdoligranulum variabile DSM 15176	Carbon Cycling	Carbon degradation	Cellulose	superkingdom:Bacteria;phylum:Firmicutes;class:Clostridia;order:Clostridiales;family:Ruminococcaceae;genus:Subdoligranulum;species:Subdoligranulum variabile;	1.09476	1.02954	1.05155	0.990456	1.13798	0.952579	1.07566	1.04707	1.04401
256751061	cellobiase	Thermoanaerobacter ethanolicus CCSD1	Carbon Cycling	Carbon degradation	Cellulose	superkingdom:Bacteria;phylum:Firmicutes;class:Clostridia;order:Thermoanaerobacterales;family:Thermoanaerobacteraceae;genus:Thermoanaerobacter;species:Thermoanaerobacter ethanolicus;	0.875126	0.78383	0.791974	0.79766	0.804523	0.826268	0.816548	NA	0.827492
308914306	cellobiase	Erysipelotrichaceae bacterium 3_1_53	Carbon Cycling	Carbon degradation	Cellulose	superkingdom:Bacteria;phylum:Firmicutes;class:Erysipelotrichia;order:Erysipelotrichales;family:Erysipelotrichaceae;	0.909244	0.782263	0.885388	0.773791	0.802237	0.848636	0.896761	0.772601	0.931236
309777961	cellobiase	Erysipelotrichaceae bacterium 3_1_53	Carbon Cycling	Carbon degradation	Cellulose	superkingdom:Bacteria;phylum:Firmicutes;class:Erysipelotrichia;order:Erysipelotrichales;family:Erysipelotrichaceae;	1.03552	1.06028	1.04449	1.10624	1.04311	1.10472	1.04577	1.12635	1.10655
308914304	cellobiase	Erysipelotrichaceae bacterium 3_1_53	Carbon Cycling	Carbon degradation	Cellulose	superkingdom:Bacteria;phylum:Firmicutes;class:Erysipelotrichia;order:Erysipelotrichales;family:Erysipelotrichaceae;	0.868381	0.80922	0.806607	0.801346	0.800931	0.875643	0.860031	NA	0.8555
229381914	cellobiase	Coprobacillus sp. D7	Carbon Cycling	Carbon degradation	Cellulose	superkingdom:Bacteria;phylum:Firmicutes;class:Erysipelotrichia;order:Erysipelotrichales;family:Erysipelotrichaceae;genus:Coprobacillus;	1.01922	0.925141	1.03056	0.873697	1.08393	0.909715	0.97747	0.939063	0.972092
237735760	cellobiase	Mollicutes bacterium D7	Carbon Cycling	Carbon degradation	Cellulose	superkingdom:Bacteria;phylum:Firmicutes;class:Erysipelotrichia;order:Erysipelotrichales;family:Erysipelotrichaceae;genus:Coprobacillus;	NA	NA	NA	0.754964	NA	0.760494	NA	NA	NA
223961301	cellobiase	Holdemania filiformis DSM 12042	Carbon Cycling	Carbon degradation	Cellulose	superkingdom:Bacteria;phylum:Firmicutes;class:Erysipelotrichia;order:Erysipelotrichales;family:Erysipelotrichaceae;genus:Holdemania;species:Holdemania filiformis;	1.13376	1.12016	1.10631	1.25252	1.07599	1.07516	1.12909	1.17948	1.15417
223964434	cellobiase	Holdemania filiformis DSM 12042	Carbon Cycling	Carbon degradation	Cellulose	superkingdom:Bacteria;phylum:Firmicutes;class:Erysipelotrichia;order:Erysipelotrichales;family:Erysipelotrichaceae;genus:Holdemania;species:Holdemania filiformis;	1.11782	1.10223	1.09879	1.09262	1.07316	1.09718	1.07538	1.10283	1.09794
223985544	cellobiase	Holdemania filiformis DSM 12042	Carbon Cycling	Carbon degradation	Cellulose	superkingdom:Bacteria;phylum:Firmicutes;class:Erysipelotrichia;order:Erysipelotrichales;family:Erysipelotrichaceae;genus:Holdemania;species:Holdemania filiformis;	0.890483	0.832038	0.973256	0.794066	0.966939	0.859168	0.834093	0.922124	0.882543
223964454	cellobiase	Holdemania filiformis DSM 12042	Carbon Cycling	Carbon degradation	Cellulose	superkingdom:Bacteria;phylum:Firmicutes;class:Erysipelotrichia;order:Erysipelotrichales;family:Erysipelotrichaceae;genus:Holdemania;species:Holdemania filiformis;	1.28865	1.23852	1.26548	1.18129	1.27562	1.20344	1.2567	1.2348	1.18444
223963942	cellobiase	Holdemania filiformis DSM 12042	Carbon Cycling	Carbon degradation	Cellulose	superkingdom:Bacteria;phylum:Firmicutes;class:Erysipelotrichia;order:Erysipelotrichales;family:Erysipelotrichaceae;genus:Holdemania;species:Holdemania filiformis;	0.91029	0.886198	0.914857	0.999854	0.916048	0.950735	0.917502	0.9703	0.947785
223963251	cellobiase	Holdemania filiformis DSM 12042	Carbon Cycling	Carbon degradation	Cellulose	superkingdom:Bacteria;phylum:Firmicutes;class:Erysipelotrichia;order:Erysipelotrichales;family:Erysipelotrichaceae;genus:Holdemania;species:Holdemania filiformis;	0.955161	0.909782	1.00041	0.847184	1.09859	0.767804	0.984583	0.91718	0.984646
223961300	cellobiase	Holdemania filiformis DSM 12042	Carbon Cycling	Carbon degradation	Cellulose	superkingdom:Bacteria;phylum:Firmicutes;class:Erysipelotrichia;order:Erysipelotrichales;family:Erysipelotrichaceae;genus:Holdemania;species:Holdemania filiformis;	1.01693	1.04508	0.99144	1.12087	1.01653	1.06729	1.00976	1.06094	1.06057
223964743	cellobiase	Holdemania filiformis DSM 12042	Carbon Cycling	Carbon degradation	Cellulose	superkingdom:Bacteria;phylum:Firmicutes;class:Erysipelotrichia;order:Erysipelotrichales;family:Erysipelotrichaceae;genus:Holdemania;species:Holdemania filiformis;	0.874848	0.877789	0.918315	0.831122	0.864466	0.846985	0.807619	0.903485	0.876427
223983462	cellobiase	Holdemania filiformis DSM 12042	Carbon Cycling	Carbon degradation	Cellulose	superkingdom:Bacteria;phylum:Firmicutes;class:Erysipelotrichia;order:Erysipelotrichales;family:Erysipelotrichaceae;genus:Holdemania;species:Holdemania filiformis;	1.21003	1.21832	1.22616	1.2487	1.21806	1.17416	1.19585	1.22507	1.25824
381367818	cellobiase	Selenomonas ruminantium subsp. lactilytica TAM6421	Carbon Cycling	Carbon degradation	Cellulose	superkingdom:Bacteria;phylum:Firmicutes;class:Negativicutes;order:Selenomonadales;family:Veillonellaceae;genus:Selenomonas;species:Selenomonas ruminantium;	0.768453	NA	0.765708	0.827478	0.891351	0.897581	NA	NA	NA
304437701	cellobiase	Selenomonas sp. oral taxon 149 str. 67H29BP	Carbon Cycling	Carbon degradation	Cellulose	superkingdom:Bacteria;phylum:Firmicutes;class:Negativicutes;order:Selenomonadales;family:Veillonellaceae;genus:Selenomonas;species:Selenomonas sp. oral taxon 149;	0.926797	0.877531	0.909709	0.816232	1.03481	0.861947	0.922868	0.841487	0.840977
268615674	cellobiase	Sebaldella termitidis ATCC 33386	Carbon Cycling	Carbon degradation	Cellulose	superkingdom:Bacteria;phylum:Fusobacteria;class:Fusobacteriia;order:Fusobacteriales;family:Leptotrichiaceae;genus:Sebaldella;species:Sebaldella termitidis;	0.887089	0.812091	0.781515	0.757465	0.792301	0.773078	0.768766	0.857245	NA
383767418	cellobiase	Phycisphaera mikurensis NBRC 102666	Carbon Cycling	Carbon degradation	Cellulose	superkingdom:Bacteria;phylum:Planctomycetes;class:Phycisphaerae;order:Phycisphaerales;family:Phycisphaeraceae;genus:Phycisphaera;species:Phycisphaera mikurensis;	1.15774	1.15436	1.15555	1.17959	1.12765	1.21553	1.12086	1.14519	1.17048
167647359	cellobiase	Caulobacter sp. K31	Carbon Cycling	Carbon degradation	Cellulose	superkingdom:Bacteria;phylum:Proteobacteria;class:Alphaproteobacteria;order:Caulobacterales;family:Caulobacteraceae;genus:Caulobacter;	1.19894	1.22829	1.21322	1.37843	1.19507	1.25261	1.2041	1.29048	1.24642
295430610	cellobiase	Caulobacter segnis ATCC 21756	Carbon Cycling	Carbon degradation	Cellulose	superkingdom:Bacteria;phylum:Proteobacteria;class:Alphaproteobacteria;order:Caulobacterales;family:Caulobacteraceae;genus:Caulobacter;species:Caulobacter segnis;	0.96663	1.01282	0.977585	1.08362	1.01795	1.03523	0.983023	1.03906	0.98738
367476735	cellobiase	Bradyrhizobium sp. ORS 285	Carbon Cycling	Carbon degradation	Cellulose	superkingdom:Bacteria;phylum:Proteobacteria;class:Alphaproteobacteria;order:Rhizobiales;family:Bradyrhizobiaceae;genus:Bradyrhizobium;	0.816253	NA	0.844261	0.742947	0.806579	NA	0.820936	NA	0.778574
146338646	cellobiase	Bradyrhizobium sp. ORS 278	Carbon Cycling	Carbon degradation	Cellulose	superkingdom:Bacteria;phylum:Proteobacteria;class:Alphaproteobacteria;order:Rhizobiales;family:Bradyrhizobiaceae;genus:Bradyrhizobium;	1.17895	1.17975	1.20151	1.29291	1.23193	1.26321	1.18088	1.23428	1.20773
367478348	cellobiase	Bradyrhizobium sp. ORS 285	Carbon Cycling	Carbon degradation	Cellulose	superkingdom:Bacteria;phylum:Proteobacteria;class:Alphaproteobacteria;order:Rhizobiales;family:Bradyrhizobiaceae;genus:Bradyrhizobium;	0.972304	0.837111	0.844969	0.869109	0.901169	0.965923	0.939322	0.79305	0.958651
365287692	cellobiase	Bradyrhizobium sp. ORS 375	Carbon Cycling	Carbon degradation	Cellulose	superkingdom:Bacteria;phylum:Proteobacteria;class:Alphaproteobacteria;order:Rhizobiales;family:Bradyrhizobiaceae;genus:Bradyrhizobium;	0.823733	0.896832	0.867021	0.933781	0.875488	0.885276	0.834465	0.931496	0.875397
365423798	cellobiase	Bradyrhizobium sp. STM 3843	Carbon Cycling	Carbon degradation	Cellulose	superkingdom:Bacteria;phylum:Proteobacteria;class:Alphaproteobacteria;order:Rhizobiales;family:Bradyrhizobiaceae;genus:Bradyrhizobium;	1.17125	1.19563	1.21517	1.16006	1.16256	1.16394	1.16289	1.17962	1.14325
365335053	cellobiase	Bradyrhizobium sp. STM 3809	Carbon Cycling	Carbon degradation	Cellulose	superkingdom:Bacteria;phylum:Proteobacteria;class:Alphaproteobacteria;order:Rhizobiales;family:Bradyrhizobiaceae;genus:Bradyrhizobium;	1.28155	1.17722	1.30048	1.17096	1.36229	1.19168	1.2255	1.17212	1.2149
146409880	cellobiase	Bradyrhizobium sp. BTAi1	Carbon Cycling	Carbon degradation	Cellulose	superkingdom:Bacteria;phylum:Proteobacteria;class:Alphaproteobacteria;order:Rhizobiales;family:Bradyrhizobiaceae;genus:Bradyrhizobium;	0.913775	0.822798	0.910242	1.00622	0.867668	1.02376	0.870919	0.844436	0.96182
365293465	cellobiase	Bradyrhizobium sp. ORS 375	Carbon Cycling	Carbon degradation	Cellulose	superkingdom:Bacteria;phylum:Proteobacteria;class:Alphaproteobacteria;order:Rhizobiales;family:Bradyrhizobiaceae;genus:Bradyrhizobium;	1.23801	1.21134	1.21777	1.23673	1.19382	1.1855	1.24917	1.27841	1.26774
365421592	cellobiase	Bradyrhizobium sp. STM 3843	Carbon Cycling	Carbon degradation	Cellulose	superkingdom:Bacteria;phylum:Proteobacteria;class:Alphaproteobacteria;order:Rhizobiales;family:Bradyrhizobiaceae;genus:Bradyrhizobium;	1.00656	1.01116	1.01088	0.996715	1.06309	1.00564	1.02542	0.930206	1.03122
27381288	cellobiase	Bradyrhizobium japonicum USDA 110	Carbon Cycling	Carbon degradation	Cellulose	superkingdom:Bacteria;phylum:Proteobacteria;class:Alphaproteobacteria;order:Rhizobiales;family:Bradyrhizobiaceae;genus:Bradyrhizobium;species:Bradyrhizobium japonicum;	1.07816	0.996967	0.975099	0.995335	0.972685	1.04485	1.07016	0.881218	1.08396
27376476	cellobiase	Bradyrhizobium japonicum USDA 110	Carbon Cycling	Carbon degradation	Cellulose	superkingdom:Bacteria;phylum:Proteobacteria;class:Alphaproteobacteria;order:Rhizobiales;family:Bradyrhizobiaceae;genus:Bradyrhizobium;species:Bradyrhizobium japonicum;	0.995913	0.96024	0.970777	1.04858	0.992474	1.01273	0.988106	0.904462	1.00546
316935108	cellobiase	Rhodopseudomonas palustris DX-1	Carbon Cycling	Carbon degradation	Cellulose	superkingdom:Bacteria;phylum:Proteobacteria;class:Alphaproteobacteria;order:Rhizobiales;family:Bradyrhizobiaceae;genus:Rhodopseudomonas;species:Rhodopseudomonas palustris;	1.11672	1.10043	1.02296	1.08794	1.12104	1.12173	1.13255	0.990595	1.15372
91682774	cellobiase	Rhodopseudomonas palustris BisB5	Carbon Cycling	Carbon degradation	Cellulose	superkingdom:Bacteria;phylum:Proteobacteria;class:Alphaproteobacteria;order:Rhizobiales;family:Bradyrhizobiaceae;genus:Rhodopseudomonas;species:Rhodopseudomonas palustris;	0.776014	0.734874	0.756908	0.754261	0.799963	0.791893	NA	NA	NA
115520555	cellobiase	Rhodopseudomonas palustris BisA53	Carbon Cycling	Carbon degradation	Cellulose	superkingdom:Bacteria;phylum:Proteobacteria;class:Alphaproteobacteria;order:Rhizobiales;family:Bradyrhizobiaceae;genus:Rhodopseudomonas;species:Rhodopseudomonas palustris;	0.866522	0.869493	0.917551	0.864854	0.840444	0.910199	0.825638	0.88286	0.846702
86573765	cellobiase	Rhodopseudomonas palustris HaA2	Carbon Cycling	Carbon degradation	Cellulose	superkingdom:Bacteria;phylum:Proteobacteria;class:Alphaproteobacteria;order:Rhizobiales;family:Bradyrhizobiaceae;genus:Rhodopseudomonas;species:Rhodopseudomonas palustris;	1.08356	0.975195	1.10037	0.95053	1.12963	0.920193	1.00681	0.994712	1.02962
151561977	cellobiase	Ochrobactrum anthropi ATCC 49188	Carbon Cycling	Carbon degradation	Cellulose	superkingdom:Bacteria;phylum:Proteobacteria;class:Alphaproteobacteria;order:Rhizobiales;family:Brucellaceae;genus:Ochrobactrum;species:Ochrobactrum anthropi;	0.875778	NA	0.90363	0.748291	0.806107	0.817845	0.873697	0.810126	0.766695
357383500	cellobiase	Pelagibacterium halotolerans B2	Carbon Cycling	Carbon degradation	Cellulose	superkingdom:Bacteria;phylum:Proteobacteria;class:Alphaproteobacteria;order:Rhizobiales;family:Hyphomicrobiaceae;genus:Pelagibacterium;species:Pelagibacterium halotolerans;	0.953068	0.865646	0.950257	1.0183	0.966996	1.05414	0.951236	0.902838	1.05827
142230	cellobiase	NA	Carbon Cycling	Carbon degradation	Cellulose	superkingdom:Bacteria;phylum:Proteobacteria;class:Alphaproteobacteria;order:Rhizobiales;family:Rhizobiaceae;genus:Agrobacterium;	1.12733	1.06415	1.14068	1.08049	1.14348	1.09065	1.04121	1.04775	1.0414
333790325	cellobiase	Agrobacterium sp. ATCC 31749	Carbon Cycling	Carbon degradation	Cellulose	superkingdom:Bacteria;phylum:Proteobacteria;class:Alphaproteobacteria;order:Rhizobiales;family:Rhizobiaceae;genus:Agrobacterium;	0.760768	NA	0.749778	0.801344	0.78353	0.820873	0.808653	0.785799	0.773894
159141318	cellobiase	Agrobacterium tumefaciens str. C58	Carbon Cycling	Carbon degradation	Cellulose	superkingdom:Bacteria;phylum:Proteobacteria;class:Alphaproteobacteria;order:Rhizobiales;family:Rhizobiaceae;genus:Agrobacterium;species:Agrobacterium fabrum;	0.882381	0.85446	0.882259	0.825722	0.92751	0.872068	0.863266	0.748686	0.895021
221724605	cellobiase	Agrobacterium radiobacter K84	Carbon Cycling	Carbon degradation	Cellulose	superkingdom:Bacteria;phylum:Proteobacteria;class:Alphaproteobacteria;order:Rhizobiales;family:Rhizobiaceae;genus:Agrobacterium;species:Agrobacterium tumefaciens;	0.824474	0.861042	0.859065	NA	0.828751	0.770465	NA	NA	NA
338822056	cellobiase	Agrobacterium tumefaciens F2	Carbon Cycling	Carbon degradation	Cellulose	superkingdom:Bacteria;phylum:Proteobacteria;class:Alphaproteobacteria;order:Rhizobiales;family:Rhizobiaceae;genus:Agrobacterium;species:Agrobacterium tumefaciens;	0.938675	0.90442	0.946767	0.954441	0.972818	0.899786	0.912617	0.935339	0.952973
222149810	cellobiase	Agrobacterium vitis S4	Carbon Cycling	Carbon degradation	Cellulose	superkingdom:Bacteria;phylum:Proteobacteria;class:Alphaproteobacteria;order:Rhizobiales;family:Rhizobiaceae;genus:Agrobacterium;species:Agrobacterium vitis;	0.916714	0.79816	0.794596	0.720523	0.787509	0.877397	0.85557	NA	0.851413
209536735	cellobiase	Rhizobium leguminosarum bv. trifolii WSM2304	Carbon Cycling	Carbon degradation	Cellulose	superkingdom:Bacteria;phylum:Proteobacteria;class:Alphaproteobacteria;order:Rhizobiales;family:Rhizobiaceae;genus:Rhizobium;species:Rhizobium leguminosarum;	0.995265	0.991963	0.965257	0.886819	1.05786	1.01077	0.979307	0.902904	1.03124
116253905	cellobiase	Rhizobium leguminosarum bv. viciae 3841	Carbon Cycling	Carbon degradation	Cellulose	superkingdom:Bacteria;phylum:Proteobacteria;class:Alphaproteobacteria;order:Rhizobiales;family:Rhizobiaceae;genus:Rhizobium;species:Rhizobium leguminosarum;	0.881886	0.874512	0.91758	0.937531	0.921699	0.899696	0.879803	0.902262	0.916136
227342469	cellobiase	Sinorhizobium fredii NGR234	Carbon Cycling	Carbon degradation	Cellulose	superkingdom:Bacteria;phylum:Proteobacteria;class:Alphaproteobacteria;order:Rhizobiales;family:Rhizobiaceae;genus:Sinorhizobium;species:Sinorhizobium fredii;	0.874833	0.902004	0.910463	1.01378	0.919709	0.972861	0.886384	0.963869	0.896822
296926994	cellobiase	Starkeya novella DSM 506	Carbon Cycling	Carbon degradation	Cellulose	superkingdom:Bacteria;phylum:Proteobacteria;class:Alphaproteobacteria;order:Rhizobiales;family:Xanthobacteraceae;genus:Starkeya;species:Starkeya novella;	0.856718	0.890338	0.869668	0.888211	0.831504	0.871074	0.867266	0.919084	0.906215
89054435	cellobiase	Jannaschia sp. CCS1	Carbon Cycling	Carbon degradation	Cellulose	superkingdom:Bacteria;phylum:Proteobacteria;class:Alphaproteobacteria;order:Rhodobacterales;family:Rhodobacteraceae;genus:Jannaschia;	1.02213	1.05419	1.05116	1.18614	1.0573	1.09689	1.03014	1.12041	1.06873
374331991	cellobiase	Pseudovibrio sp. FO-BEG1	Carbon Cycling	Carbon degradation	Cellulose	superkingdom:Bacteria;phylum:Proteobacteria;class:Alphaproteobacteria;order:Rhodobacterales;family:Rhodobacteraceae;genus:Pseudovibrio;	0.752406	NA	0.755764	0.787511	0.749744	0.800913	0.774086	NA	0.822192
259022229	cellobiase	Rhodobacter sp. SW2	Carbon Cycling	Carbon degradation	Cellulose	superkingdom:Bacteria;phylum:Proteobacteria;class:Alphaproteobacteria;order:Rhodobacterales;family:Rhodobacteraceae;genus:Rhodobacter;	1.03099	0.961649	1.02811	0.914269	1.09409	0.86224	1.00785	0.96394	1.00095
294677306	cellobiase	Rhodobacter capsulatus SB 1003	Carbon Cycling	Carbon degradation	Cellulose	superkingdom:Bacteria;phylum:Proteobacteria;class:Alphaproteobacteria;order:Rhodobacterales;family:Rhodobacteraceae;genus:Rhodobacter;species:Rhodobacter capsulatus;	1.17542	1.15361	1.16318	1.17133	1.21057	1.16404	1.19768	1.05316	1.21097
338757689a	cellobiase	Roseobacter litoralis Och 149	Carbon Cycling	Carbon degradation	Cellulose	superkingdom:Bacteria;phylum:Proteobacteria;class:Alphaproteobacteria;order:Rhodobacterales;family:Rhodobacteraceae;genus:Roseobacter;species:Roseobacter litoralis;	1.07982	1.09698	1.12448	1.10041	1.00764	1.12312	1.10359	1.06622	1.06771
338757689b	cellobiase	Roseobacter litoralis Och 149	Carbon Cycling	Carbon degradation	Cellulose	superkingdom:Bacteria;phylum:Proteobacteria;class:Alphaproteobacteria;order:Rhodobacterales;family:Rhodobacteraceae;genus:Roseobacter;species:Roseobacter litoralis;	1.17873	1.14012	1.16963	1.22775	1.11298	1.21411	1.15641	1.09195	1.21297
259418465	cellobiase	Silicibacter sp. TrichCH4B	Carbon Cycling	Carbon degradation	Cellulose	superkingdom:Bacteria;phylum:Proteobacteria;class:Alphaproteobacteria;order:Rhodobacterales;family:Rhodobacteraceae;genus:Ruegeria;	0.900255	0.944344	0.913936	0.859906	0.850902	0.957174	0.903614	0.89742	0.907086
99078285	cellobiase	Silicibacter sp. TM1040	Carbon Cycling	Carbon degradation	Cellulose	superkingdom:Bacteria;phylum:Proteobacteria;class:Alphaproteobacteria;order:Rhodobacterales;family:Rhodobacteraceae;genus:Ruegeria;	0.899257	0.870708	0.832672	0.844691	0.923807	0.834316	0.865948	NA	0.91393
260418250	cellobiase	Silicibacter lacuscaerulensis ITI-1157	Carbon Cycling	Carbon degradation	Cellulose	superkingdom:Bacteria;phylum:Proteobacteria;class:Alphaproteobacteria;order:Rhodobacterales;family:Rhodobacteraceae;genus:Ruegeria;species:Ruegeria lacuscaerulensis;	1.04494	1.07413	1.04248	1.12017	1.0318	1.07259	1.01113	1.07204	1.10761
288961539	cellobiase	Azospirillum sp. B510	Carbon Cycling	Carbon degradation	Cellulose	superkingdom:Bacteria;phylum:Proteobacteria;class:Alphaproteobacteria;order:Rhodospirillales;family:Rhodospirillaceae;genus:Azospirillum;species:Azospirillum lipoferum;	1.02607	0.998324	1.01493	1.07123	1.05155	1.05046	1.02369	1.00362	1.04159
357428333	cellobiase	Azospirillum lipoferum 4B	Carbon Cycling	Carbon degradation	Cellulose	superkingdom:Bacteria;phylum:Proteobacteria;class:Alphaproteobacteria;order:Rhodospirillales;family:Rhodospirillaceae;genus:Azospirillum;species:Azospirillum lipoferum;	1.04715	1.10101	1.09193	1.03723	1.05343	1.03744	1.03938	1.08982	1.00716
357428354	cellobiase	Azospirillum lipoferum 4B	Carbon Cycling	Carbon degradation	Cellulose	superkingdom:Bacteria;phylum:Proteobacteria;class:Alphaproteobacteria;order:Rhodospirillales;family:Rhodospirillaceae;genus:Azospirillum;species:Azospirillum lipoferum;	0.880274	0.915404	0.91195	0.955503	0.912337	0.891104	0.912206	0.960695	0.916228
357427789	cellobiase	Azospirillum lipoferum 4B	Carbon Cycling	Carbon degradation	Cellulose	superkingdom:Bacteria;phylum:Proteobacteria;class:Alphaproteobacteria;order:Rhodospirillales;family:Rhodospirillaceae;genus:Azospirillum;species:Azospirillum lipoferum;	0.951573	1.02315	1.03826	0.93484	0.983483	0.98208	0.946554	0.983725	0.948327
144899536	cellobiase	Magnetospirillum gryphiswaldense MSR-1	Carbon Cycling	Carbon degradation	Cellulose	superkingdom:Bacteria;phylum:Proteobacteria;class:Alphaproteobacteria;order:Rhodospirillales;family:Rhodospirillaceae;genus:Magnetospirillum;species:Magnetospirillum gryphiswaldense;	1.04712	1.03499	0.976685	0.88014	1.00214	0.992615	1.05708	0.956918	1.07912
144901256	cellobiase	Magnetospirillum gryphiswaldense MSR-1	Carbon Cycling	Carbon degradation	Cellulose	superkingdom:Bacteria;phylum:Proteobacteria;class:Alphaproteobacteria;order:Rhodospirillales;family:Rhodospirillaceae;genus:Magnetospirillum;species:Magnetospirillum gryphiswaldense;	1.29347	1.26888	1.39949	1.31333	1.4653	1.30729	1.33064	1.34826	1.37524
83309318	cellobiase	Magnetospirillum magneticum AMB-1	Carbon Cycling	Carbon degradation	Cellulose	superkingdom:Bacteria;phylum:Proteobacteria;class:Alphaproteobacteria;order:Rhodospirillales;family:Rhodospirillaceae;genus:Magnetospirillum;species:Magnetospirillum magneticum;	NA	NA	NA	NA	0.858477	0.754542	NA	NA	NA
380681878	cellobiase	Phaeospirillum molischianum DSM 120	Carbon Cycling	Carbon degradation	Cellulose	superkingdom:Bacteria;phylum:Proteobacteria;class:Alphaproteobacteria;order:Rhodospirillales;family:Rhodospirillaceae;genus:Phaeospirillum;species:Phaeospirillum molischianum;	1.31336	1.30721	1.35355	1.22972	1.31438	1.29566	1.32523	1.27215	1.27984
333937035	cellobiase	Novosphingobium sp. PP1Y	Carbon Cycling	Carbon degradation	Cellulose	superkingdom:Bacteria;phylum:Proteobacteria;class:Alphaproteobacteria;order:Sphingomonadales;family:Sphingomonadaceae;genus:Novosphingobium;	1.27241	1.24813	1.27489	1.28451	1.22982	1.27834	1.27724	1.23919	1.2822
324106170	cellobiase	Sphingomonas sp. 2F2	Carbon Cycling	Carbon degradation	Cellulose	superkingdom:Bacteria;phylum:Proteobacteria;class:Alphaproteobacteria;order:Sphingomonadales;family:Sphingomonadaceae;genus:Sphingomonas;	0.962426	0.938889	0.952	0.953753	1.01302	1.01077	0.957003	0.806475	1.00359
103486508	cellobiase	Sphingopyxis alaskensis RB2256	Carbon Cycling	Carbon degradation	Cellulose	superkingdom:Bacteria;phylum:Proteobacteria;class:Alphaproteobacteria;order:Sphingomonadales;family:Sphingomonadaceae;genus:Sphingopyxis;species:Sphingopyxis alaskensis;	0.883965	0.843918	0.920253	0.854829	0.904462	0.880092	0.828415	0.870062	0.803805
209516215	cellobiase	Burkholderia sp. H160	Carbon Cycling	Carbon degradation	Cellulose	superkingdom:Bacteria;phylum:Proteobacteria;class:Betaproteobacteria;order:Burkholderiales;family:Burkholderiaceae;genus:Burkholderia;	1.33647	1.33419	1.37303	1.36118	1.3288	1.3233	1.34205	1.3368	1.39372
295681094	cellobiase	Burkholderia sp. CCGE1002	Carbon Cycling	Carbon degradation	Cellulose	superkingdom:Bacteria;phylum:Proteobacteria;class:Betaproteobacteria;order:Burkholderiales;family:Burkholderiaceae;genus:Burkholderia;	1.39254	1.34007	1.34817	1.32799	1.51732	1.46136	1.38013	1.34756	1.43891
209500047	cellobiase	Burkholderia sp. H160	Carbon Cycling	Carbon degradation	Cellulose	superkingdom:Bacteria;phylum:Proteobacteria;class:Betaproteobacteria;order:Burkholderiales;family:Burkholderiaceae;genus:Burkholderia;	1.13759	1.13735	1.15929	1.20975	1.12034	1.16746	1.10574	1.14201	1.15009
184196547	cellobiase	Burkholderia phymatum STM815	Carbon Cycling	Carbon degradation	Cellulose	superkingdom:Bacteria;phylum:Proteobacteria;class:Betaproteobacteria;order:Burkholderiales;family:Burkholderiaceae;genus:Burkholderia;species:Burkholderia phymatum;	0.837348	0.815544	0.810423	0.870742	0.811028	0.879038	0.814499	0.792741	0.857118
117993965	cellobiase	Burkholderia phytofirmans PsJN	Carbon Cycling	Carbon degradation	Cellulose	superkingdom:Bacteria;phylum:Proteobacteria;class:Betaproteobacteria;order:Burkholderiales;family:Burkholderiaceae;genus:Burkholderia;species:Burkholderia phytofirmans;	NA	NA	NA	NA	0.788967	0.789749	NA	NA	NA
91778045	cellobiase	Burkholderia xenovorans LB400	Carbon Cycling	Carbon degradation	Cellulose	superkingdom:Bacteria;phylum:Proteobacteria;class:Betaproteobacteria;order:Burkholderiales;family:Burkholderiaceae;genus:Burkholderia;species:Burkholderia xenovorans;	0.930145	0.928287	0.910548	0.927137	0.955728	0.978891	0.924085	0.899596	0.885834
89344649	cellobiase	Rhodoferax ferrireducens T118	Carbon Cycling	Carbon degradation	Cellulose	superkingdom:Bacteria;phylum:Proteobacteria;class:Betaproteobacteria;order:Burkholderiales;family:Comamonadaceae;genus:Albidiferax;species:Albidiferax ferrireducens;	1.0193	1.04215	1.08553	1.02647	0.98275	1.07642	1.06312	1.05253	1.05164
89344640	cellobiase	Rhodoferax ferrireducens T118	Carbon Cycling	Carbon degradation	Cellulose	superkingdom:Bacteria;phylum:Proteobacteria;class:Betaproteobacteria;order:Burkholderiales;family:Comamonadaceae;genus:Albidiferax;species:Albidiferax ferrireducens;	0.992083	1.02596	0.984277	1.01415	0.951175	1.12036	0.960162	0.972303	0.967274
260221578	cellobiase	Curvibacter putative symbiont of Hydra magnipapillata	Carbon Cycling	Carbon degradation	Cellulose	superkingdom:Bacteria;phylum:Proteobacteria;class:Betaproteobacteria;order:Burkholderiales;family:Comamonadaceae;genus:Curvibacter;	1.1517	1.13468	1.12841	1.25627	1.18817	1.17911	1.16003	1.20288	1.19012
171060987	cellobiase	Leptothrix cholodnii SP-6	Carbon Cycling	Carbon degradation	Cellulose	superkingdom:Bacteria;phylum:Proteobacteria;class:Betaproteobacteria;order:Burkholderiales;genus:Leptothrix;species:Leptothrix cholodnii;	1.13881	1.09647	1.12555	1.12852	1.1712	1.13793	1.11564	1.0106	1.14716
34102582	cellobiase	Chromobacterium violaceum ATCC 12472	Carbon Cycling	Carbon degradation	Cellulose	superkingdom:Bacteria;phylum:Proteobacteria;class:Betaproteobacteria;order:Neisseriales;family:Neisseriaceae;genus:Chromobacterium;species:Chromobacterium violaceum;	0.913513	0.883812	0.966182	0.851727	0.90986	NA	0.930189	0.785931	0.873691
115375769	cellobiase	Stigmatella aurantiaca DW4/3-1	Carbon Cycling	Carbon degradation	Cellulose	superkingdom:Bacteria;phylum:Proteobacteria;class:Deltaproteobacteria;order:Myxococcales;family:Cystobacteraceae;genus:Stigmatella;species:Stigmatella aurantiaca;	1.09133	1.13396	1.14168	1.08515	1.0914	1.10958	1.10539	1.12784	1.12115
309395684	cellobiase	Stigmatella aurantiaca DW4/3-1	Carbon Cycling	Carbon degradation	Cellulose	superkingdom:Bacteria;phylum:Proteobacteria;class:Deltaproteobacteria;order:Myxococcales;family:Cystobacteraceae;genus:Stigmatella;species:Stigmatella aurantiaca;	1.07204	1.14634	1.1192	1.0625	1.05654	1.04935	1.07862	1.11374	1.0553
115366575	cellobiase	Stigmatella aurantiaca DW4/3-1	Carbon Cycling	Carbon degradation	Cellulose	superkingdom:Bacteria;phylum:Proteobacteria;class:Deltaproteobacteria;order:Myxococcales;family:Cystobacteraceae;genus:Stigmatella;species:Stigmatella aurantiaca;	1.00269	0.946729	1.058	0.94102	1.05279	0.997054	0.958317	0.962543	0.997287
310818140	cellobiase	Stigmatella aurantiaca DW4/3-1	Carbon Cycling	Carbon degradation	Cellulose	superkingdom:Bacteria;phylum:Proteobacteria;class:Deltaproteobacteria;order:Myxococcales;family:Cystobacteraceae;genus:Stigmatella;species:Stigmatella aurantiaca;	0.879353	0.781215	0.89401	0.82051	0.937444	0.918308	0.824044	NA	0.913078
380732199	cellobiase	Corallococcus coralloides DSM 2259	Carbon Cycling	Carbon degradation	Cellulose	superkingdom:Bacteria;phylum:Proteobacteria;class:Deltaproteobacteria;order:Myxococcales;family:Myxococcaceae;genus:Corallococcus;species:Corallococcus coralloides;	1.22948	1.18444	1.21573	1.25778	1.25674	1.26308	1.23181	1.13835	1.23054
380732198	cellobiase	Corallococcus coralloides DSM 2259	Carbon Cycling	Carbon degradation	Cellulose	superkingdom:Bacteria;phylum:Proteobacteria;class:Deltaproteobacteria;order:Myxococcales;family:Myxococcaceae;genus:Corallococcus;species:Corallococcus coralloides;	1.0387	1.07336	1.05479	1.13781	1.02562	0.997331	1.03962	1.14888	1.08397
90021041	cellobiase	Saccharophagus degradans 2-40	Carbon Cycling	Carbon degradation	Cellulose	superkingdom:Bacteria;phylum:Proteobacteria;class:Gammaproteobacteria;order:Alteromonadales;family:Alteromonadaceae;genus:Saccharophagus;species:Saccharophagus degradans;	NA	NA	NA	NA	0.744286	0.848061	NA	NA	NA
358047398	cellobiase	Pseudoalteromonas sp. BSi20495	Carbon Cycling	Carbon degradation	Cellulose	superkingdom:Bacteria;phylum:Proteobacteria;class:Gammaproteobacteria;order:Alteromonadales;family:Pseudoalteromonadaceae;genus:Pseudoalteromonas;	0.903477	0.839664	0.839394	0.773985	0.910532	0.796909	0.853857	NA	0.885012
357919438	cellobiase	Pseudoalteromonas sp. BSi20652	Carbon Cycling	Carbon degradation	Cellulose	superkingdom:Bacteria;phylum:Proteobacteria;class:Gammaproteobacteria;order:Alteromonadales;family:Pseudoalteromonadaceae;genus:Pseudoalteromonas;	0.869408	0.91569	0.898126	0.84212	0.858206	0.850525	0.864701	0.899928	0.907811
119774539	cellobiase	Shewanella amazonensis SB2B	Carbon Cycling	Carbon degradation	Cellulose	superkingdom:Bacteria;phylum:Proteobacteria;class:Gammaproteobacteria;order:Alteromonadales;family:Shewanellaceae;genus:Shewanella;species:Shewanella amazonensis;	1.09438	1.0557	1.07124	1.07341	1.12711	1.09917	1.12272	0.921901	1.14335
114562494	cellobiase	Shewanella frigidimarina NCIMB 400	Carbon Cycling	Carbon degradation	Cellulose	superkingdom:Bacteria;phylum:Proteobacteria;class:Gammaproteobacteria;order:Alteromonadales;family:Shewanellaceae;genus:Shewanella;species:Shewanella frigidimarina;	0.87386	0.788525	0.872249	0.737498	0.983825	0.851113	0.794402	0.771323	0.799585
288895729	cellobiase	Allochromatium vinosum DSM 180	Carbon Cycling	Carbon degradation	Cellulose	superkingdom:Bacteria;phylum:Proteobacteria;class:Gammaproteobacteria;order:Chromatiales;family:Chromatiaceae;genus:Allochromatium;species:Allochromatium vinosum;	1.07392	1.06524	1.08786	1.13171	1.00873	1.0846	1.04466	1.05856	1.078
343802060	cellobiase	Thiocapsa marina 5811	Carbon Cycling	Carbon degradation	Cellulose	superkingdom:Bacteria;phylum:Proteobacteria;class:Gammaproteobacteria;order:Chromatiales;family:Chromatiaceae;genus:Thiocapsa;species:Thiocapsa marina;	1.10415	0.987105	1.08261	1.13517	1.12331	1.12277	1.06105	1.06755	1.14978
344338068	cellobiase	Thiocapsa marina 5811	Carbon Cycling	Carbon degradation	Cellulose	superkingdom:Bacteria;phylum:Proteobacteria;class:Gammaproteobacteria;order:Chromatiales;family:Chromatiaceae;genus:Thiocapsa;species:Thiocapsa marina;	1.10505	1.03046	1.03286	0.991435	1.19109	1.02067	1.06376	1.0058	1.00081
345869869	cellobiase	Thiorhodococcus drewsii AZ1	Carbon Cycling	Carbon degradation	Cellulose	superkingdom:Bacteria;phylum:Proteobacteria;class:Gammaproteobacteria;order:Chromatiales;family:Chromatiaceae;genus:Thiorhodococcus;species:Thiorhodococcus drewsii;	0.890105	NA	0.937605	0.721734	0.813186	0.784519	0.79993	0.778212	0.813384
306529970	cellobiase	Dickeya dadantii 3937	Carbon Cycling	Carbon degradation	Cellulose	superkingdom:Bacteria;phylum:Proteobacteria;class:Gammaproteobacteria;order:Enterobacteriales;family:Enterobacteriaceae;genus:Dickeya;species:Dickeya dadantii;	0.84746	0.828035	NA	NA	0.752552	0.839213	NA	0.814523	0.772859
270346271	cellobiase	Dickeya dadantii Ech586	Carbon Cycling	Carbon degradation	Cellulose	superkingdom:Bacteria;phylum:Proteobacteria;class:Gammaproteobacteria;order:Enterobacteriales;family:Enterobacteriaceae;genus:Dickeya;species:Dickeya dadantii;	0.895618	0.891339	0.895804	0.952718	0.852431	0.936909	0.922551	1.00642	0.944606
306529969	cellobiase	Dickeya dadantii 3937	Carbon Cycling	Carbon degradation	Cellulose	superkingdom:Bacteria;phylum:Proteobacteria;class:Gammaproteobacteria;order:Enterobacteriales;family:Enterobacteriaceae;genus:Dickeya;species:Dickeya dadantii;	1.0659	1.11665	1.0276	1.18893	1.07615	1.13479	1.0879	1.16019	1.1059
146310965	cellobiase	Enterobacter sp. 638	Carbon Cycling	Carbon degradation	Cellulose	superkingdom:Bacteria;phylum:Proteobacteria;class:Gammaproteobacteria;order:Enterobacteriales;family:Enterobacteriaceae;genus:Enterobacter;	0.859255	0.904931	0.892731	0.87909	0.886313	0.932899	0.866119	0.909972	0.898978
288316040	cellobiase	Enterobacter cancerogenus ATCC 35316	Carbon Cycling	Carbon degradation	Cellulose	superkingdom:Bacteria;phylum:Proteobacteria;class:Gammaproteobacteria;order:Enterobacteriales;family:Enterobacteriaceae;genus:Enterobacter;species:Enterobacter cancerogenus;	1.10577	1.09338	1.1376	1.20861	1.11552	1.13688	1.10118	1.17773	1.1326
288315598	cellobiase	Enterobacter cancerogenus ATCC 35316	Carbon Cycling	Carbon degradation	Cellulose	superkingdom:Bacteria;phylum:Proteobacteria;class:Gammaproteobacteria;order:Enterobacteriales;family:Enterobacteriaceae;genus:Enterobacter;species:Enterobacter cancerogenus;	0.94995	0.962084	0.981664	0.895734	0.929658	0.872974	0.933345	0.956247	0.894419
510390	cellobiase	Pantoea agglomerans	Carbon Cycling	Carbon degradation	Cellulose	superkingdom:Bacteria;phylum:Proteobacteria;class:Gammaproteobacteria;order:Enterobacteriales;family:Enterobacteriaceae;genus:Pantoea;	0.886944	0.802318	0.750418	0.758056	1.00337	0.827038	0.799888	NA	0.889818
327393564	cellobiase	Pantoea ananatis AJ13355	Carbon Cycling	Carbon degradation	Cellulose	superkingdom:Bacteria;phylum:Proteobacteria;class:Gammaproteobacteria;order:Enterobacteriales;family:Enterobacteriaceae;genus:Pantoea;species:Pantoea ananatis;	1.03254	0.984668	0.98712	1.08891	0.995128	1.04666	0.941234	0.970716	0.993949
378580098	cellobiase	Pantoea stewartii subsp. stewartii DC283	Carbon Cycling	Carbon degradation	Cellulose	superkingdom:Bacteria;phylum:Proteobacteria;class:Gammaproteobacteria;order:Enterobacteriales;family:Enterobacteriaceae;genus:Pantoea;species:Pantoea stewartii;	1.0865	0.993295	1.10926	0.938291	1.13304	1.02115	1.01214	1.03115	1.02104
378581705	cellobiase	Pantoea stewartii subsp. stewartii DC283	Carbon Cycling	Carbon degradation	Cellulose	superkingdom:Bacteria;phylum:Proteobacteria;class:Gammaproteobacteria;order:Enterobacteriales;family:Enterobacteriaceae;genus:Pantoea;species:Pantoea stewartii;	0.794175	NA	0.753298	0.758907	0.794897	0.828446	0.769643	NA	0.854783
251754431	cellobiase	Pectobacterium carotovorum subsp. carotovorum PC1	Carbon Cycling	Carbon degradation	Cellulose	superkingdom:Bacteria;phylum:Proteobacteria;class:Gammaproteobacteria;order:Enterobacteriales;family:Enterobacteriaceae;genus:Pectobacterium;species:Pectobacterium carotovorum;	0.852557	0.853956	NA	0.754882	0.873596	0.777069	0.80304	0.823622	0.78305
62198732	cellobiase	Pectobacterium carotovorum subsp. carotovorum	Carbon Cycling	Carbon degradation	Cellulose	superkingdom:Bacteria;phylum:Proteobacteria;class:Gammaproteobacteria;order:Enterobacteriales;family:Enterobacteriaceae;genus:Pectobacterium;species:Pectobacterium carotovorum;	0.83633	0.79898	0.875355	0.824537	0.928529	0.848026	0.821236	NA	0.814848
45181609	cellobiase	Pectobacterium carotovorum subsp. carotovorum	Carbon Cycling	Carbon degradation	Cellulose	superkingdom:Bacteria;phylum:Proteobacteria;class:Gammaproteobacteria;order:Enterobacteriales;family:Enterobacteriaceae;genus:Pectobacterium;species:Pectobacterium carotovorum;	0.960576	0.960326	0.947666	0.970317	0.960279	0.997673	0.940292	0.861059	0.996721
386331009	cellobiase	Serratia sp. AS13	Carbon Cycling	Carbon degradation	Cellulose	superkingdom:Bacteria;phylum:Proteobacteria;class:Gammaproteobacteria;order:Enterobacteriales;family:Enterobacteriaceae;genus:Serratia;	1.20512	1.16634	1.19104	1.24116	1.20446	1.24008	1.21022	1.09177	1.2366
293393835	cellobiase	Serratia odorifera DSM 4582	Carbon Cycling	Carbon degradation	Cellulose	superkingdom:Bacteria;phylum:Proteobacteria;class:Gammaproteobacteria;order:Enterobacteriales;family:Enterobacteriaceae;genus:Serratia;species:Serratia odorifera;	1.11993	1.02101	1.01519	0.852922	1.04356	1.1432	1.1591	0.949992	1.18917
333930596	cellobiase	Serratia plymuthica AS9	Carbon Cycling	Carbon degradation	Cellulose	superkingdom:Bacteria;phylum:Proteobacteria;class:Gammaproteobacteria;order:Enterobacteriales;family:Enterobacteriaceae;genus:Serratia;species:Serratia plymuthica;	0.887336	NA	0.879038	0.781879	0.820515	0.837813	0.854684	0.950577	0.868386
157370564	cellobiase	Serratia proteamaculans 568	Carbon Cycling	Carbon degradation	Cellulose	superkingdom:Bacteria;phylum:Proteobacteria;class:Gammaproteobacteria;order:Enterobacteriales;family:Enterobacteriaceae;genus:Serratia;species:Serratia proteamaculans;	0.785159	NA	0.78483	0.814101	0.776856	0.792177	0.811927	0.844288	0.79403
157320845	cellobiase	Serratia proteamaculans 568	Carbon Cycling	Carbon degradation	Cellulose	superkingdom:Bacteria;phylum:Proteobacteria;class:Gammaproteobacteria;order:Enterobacteriales;family:Enterobacteriaceae;genus:Serratia;species:Serratia proteamaculans;	NA	NA	NA	0.819015	0.766944	0.77694	NA	0.814756	0.805983
238759206	cellobiase	Yersinia aldovae ATCC 35236	Carbon Cycling	Carbon degradation	Cellulose	superkingdom:Bacteria;phylum:Proteobacteria;class:Gammaproteobacteria;order:Enterobacteriales;family:Enterobacteriaceae;genus:Yersinia;species:Yersinia aldovae;	1.02426	0.926354	0.960498	1.00288	1.09065	1.06636	0.995714	0.957904	1.07248
238726891	cellobiase	Yersinia intermedia ATCC 29909	Carbon Cycling	Carbon degradation	Cellulose	superkingdom:Bacteria;phylum:Proteobacteria;class:Gammaproteobacteria;order:Enterobacteriales;family:Enterobacteriaceae;genus:Yersinia;species:Yersinia intermedia;	0.924901	0.943702	0.905562	0.912551	0.903271	1.005	0.898633	0.910349	0.891656
238762707	cellobiase	Yersinia kristensenii ATCC 33638	Carbon Cycling	Carbon degradation	Cellulose	superkingdom:Bacteria;phylum:Proteobacteria;class:Gammaproteobacteria;order:Enterobacteriales;family:Enterobacteriaceae;genus:Yersinia;species:Yersinia kristensenii;	1.20346	1.16723	1.30411	1.18369	1.24126	1.17932	1.18038	1.22115	1.22723
238719418	cellobiase	Yersinia mollaretii ATCC 43969	Carbon Cycling	Carbon degradation	Cellulose	superkingdom:Bacteria;phylum:Proteobacteria;class:Gammaproteobacteria;order:Enterobacteriales;family:Enterobacteriaceae;genus:Yersinia;species:Yersinia mollaretii;	0.898177	0.850889	1.01144	0.811743	1.00733	0.897987	0.872371	0.926038	0.829839
238750439	cellobiase	Yersinia rohdei ATCC 43380	Carbon Cycling	Carbon degradation	Cellulose	superkingdom:Bacteria;phylum:Proteobacteria;class:Gammaproteobacteria;order:Enterobacteriales;family:Enterobacteriaceae;genus:Yersinia;species:Yersinia rohdei;	1.044	0.936961	0.949053	0.896534	1.04942	1.01268	1.06403	0.926861	0.849583
53804090	cellobiase	Methylococcus capsulatus str. Bath	Carbon Cycling	Carbon degradation	Cellulose	superkingdom:Bacteria;phylum:Proteobacteria;class:Gammaproteobacteria;order:Methylococcales;family:Methylococcaceae;genus:Methylococcus;species:Methylococcus capsulatus;	0.917609	0.850616	0.837345	0.805377	0.956775	0.929245	0.853492	0.818406	0.881859
150839214	cellobiase	Marinomonas sp. MWYL1	Carbon Cycling	Carbon degradation	Cellulose	superkingdom:Bacteria;phylum:Proteobacteria;class:Gammaproteobacteria;order:Oceanospirillales;family:Oceanospirillaceae;genus:Marinomonas;	0.856179	NA	0.826642	0.70978	0.871213	0.814523	NA	NA	NA
326793538	cellobiase	Marinomonas mediterranea MMB-1	Carbon Cycling	Carbon degradation	Cellulose	superkingdom:Bacteria;phylum:Proteobacteria;class:Gammaproteobacteria;order:Oceanospirillales;family:Oceanospirillaceae;genus:Marinomonas;species:Marinomonas mediterranea;	0.842195	0.821486	0.801216	0.822679	0.810053	0.854995	0.832423	NA	0.864176
152984294	cellobiase	Pseudomonas aeruginosa PA7	Carbon Cycling	Carbon degradation	Cellulose	superkingdom:Bacteria;phylum:Proteobacteria;class:Gammaproteobacteria;order:Pseudomonadales;family:Pseudomonadaceae;genus:Pseudomonas;species:Pseudomonas aeruginosa;	1.19177	1.23398	1.21249	1.32671	1.22064	1.22198	1.20537	1.30771	1.25727
148871091	cellobiase	Vibrio harveyi HY01	Carbon Cycling	Carbon degradation	Cellulose	superkingdom:Bacteria;phylum:Proteobacteria;class:Gammaproteobacteria;order:Vibrionales;family:Vibrionaceae;genus:Vibrio;species:Vibrio campbellii;	0.859494	0.816761	0.818117	0.834108	0.831483	0.83959	0.848438	0.783324	0.872738
351684017	cellobiase	Rhodanobacter sp. 2APBS1	Carbon Cycling	Carbon degradation	Cellulose	superkingdom:Bacteria;phylum:Proteobacteria;class:Gammaproteobacteria;order:Xanthomonadales;family:Xanthomonadaceae;genus:Rhodanobacter;	1.22272	1.18555	1.21156	1.23667	1.21747	1.26252	1.21485	1.1345	1.27274
333738230	cellobiase	Treponema primitia ZAS-2	Carbon Cycling	Carbon degradation	Cellulose	superkingdom:Bacteria;phylum:Spirochaetes;class:Spirochaetia;order:Spirochaetales;family:Spirochaetaceae;genus:Treponema;species:Treponema primitia;	0.85164	0.902405	0.881622	1.00813	0.878214	0.894213	0.860025	0.956256	0.889144
333739060	cellobiase	Treponema primitia ZAS-2	Carbon Cycling	Carbon degradation	Cellulose	superkingdom:Bacteria;phylum:Spirochaetes;class:Spirochaetia;order:Spirochaetales;family:Spirochaetaceae;genus:Treponema;species:Treponema primitia;	0.96015	0.977897	0.966603	1.00123	0.9718	0.924361	1.0087	1.00681	0.979239
24496479	cellobiase	Fervidobacterium sp. YNP	Carbon Cycling	Carbon degradation	Cellulose	superkingdom:Bacteria;phylum:Thermotogae;class:Thermotogae;order:Thermotogales;family:Thermotogaceae;genus:Fervidobacterium;	NA	NA	NA	0.743448	0.7388	0.730466	0.764528	NA	0.73395
383785752	cellobiase	Fervidobacterium pennivorans DSM 9078	Carbon Cycling	Carbon degradation	Cellulose	superkingdom:Bacteria;phylum:Thermotogae;class:Thermotogae;order:Thermotogales;family:Thermotogaceae;genus:Fervidobacterium;species:Fervidobacterium pennivorans;	0.874082	0.787554	0.851239	0.755621	0.85249	0.803923	0.851247	NA	0.888611
144947051	cellobiase	Petrotoga mobilis SJ95	Carbon Cycling	Carbon degradation	Cellulose	superkingdom:Bacteria;phylum:Thermotogae;class:Thermotogae;order:Thermotogales;family:Thermotogaceae;genus:Petrotoga;species:Petrotoga mobilis;	0.890583	0.909267	0.931672	0.839119	0.910176	0.911917	0.912699	0.923105	0.926073
395291	cellobiase	Thermotoga maritima	Carbon Cycling	Carbon degradation	Cellulose	superkingdom:Bacteria;phylum:Thermotogae;class:Thermotogae;order:Thermotogales;family:Thermotogaceae;genus:Thermotoga;	0.79212	0.781052	0.730434	NA	0.75869	0.735231	NA	NA	NA
373850890	cellobiase	Opitutaceae bacterium TAV5	Carbon Cycling	Carbon degradation	Cellulose	superkingdom:Bacteria;phylum:Verrucomicrobia;class:Opitutae;family:Opitutaceae;	1.17717	1.1336	1.16282	1.05621	1.13771	1.26919	1.15433	0.943153	1.21075
153892922	cellobiase	Opitutaceae bacterium TAV2	Carbon Cycling	Carbon degradation	Cellulose	superkingdom:Bacteria;phylum:Verrucomicrobia;class:Opitutae;family:Opitutaceae;	0.799647	NA	0.761817	NA	0.912189	0.780311	NA	NA	NA
372474799	cellobiase	Opitutaceae bacterium TAV5	Carbon Cycling	Carbon degradation	Cellulose	superkingdom:Bacteria;phylum:Verrucomicrobia;class:Opitutae;family:Opitutaceae;	1.0874	1.00721	1.12438	0.983507	1.19974	0.846674	1.11449	1.04444	1.11499
151582326	cellobiase	Opitutaceae bacterium TAV2	Carbon Cycling	Carbon degradation	Cellulose	superkingdom:Bacteria;phylum:Verrucomicrobia;class:Opitutae;family:Opitutaceae;	1.19916	1.11145	1.13729	1.13688	1.24568	1.07045	1.17346	1.13956	1.1364
373850932	cellobiase	Opitutaceae bacterium TAV5	Carbon Cycling	Carbon degradation	Cellulose	superkingdom:Bacteria;phylum:Verrucomicrobia;class:Opitutae;family:Opitutaceae;	0.973663	0.958327	0.942183	0.945465	0.909506	0.989053	1.03956	NA	1.06233
373851875	cellobiase	Opitutaceae bacterium TAV5	Carbon Cycling	Carbon degradation	Cellulose	superkingdom:Bacteria;phylum:Verrucomicrobia;class:Opitutae;family:Opitutaceae;	1.07436	1.04574	1.07197	1.14974	1.08478	1.1261	1.05919	1.14679	1.1089
153893454	cellobiase	Opitutaceae bacterium TAV2	Carbon Cycling	Carbon degradation	Cellulose	superkingdom:Bacteria;phylum:Verrucomicrobia;class:Opitutae;family:Opitutaceae;	1.12978	1.10921	1.13537	1.18913	1.16179	1.14856	1.12431	1.14302	1.14964
312217489	cellobiase	Leptosphaeria maculans	Carbon Cycling	Carbon degradation	Cellulose	superkingdom:Eukaryota;kingdom:Fungi;phylum:Ascomycota;class:Dothideomycetes;order:Pleosporales;family:Leptosphaeriaceae;genus:Leptosphaeria;	0.973443	0.958502	0.950803	0.946504	0.882394	0.953294	0.953086	0.961309	0.966997
312212973	cellobiase	Leptosphaeria maculans	Carbon Cycling	Carbon degradation	Cellulose	superkingdom:Eukaryota;kingdom:Fungi;phylum:Ascomycota;class:Dothideomycetes;order:Pleosporales;family:Leptosphaeriaceae;genus:Leptosphaeria;	0.817255	0.882341	0.840745	0.886286	0.866725	0.900687	0.844307	NA	0.897605
169595502a	cellobiase	Phaeosphaeria nodorum SN15	Carbon Cycling	Carbon degradation	Cellulose	superkingdom:Eukaryota;kingdom:Fungi;phylum:Ascomycota;class:Dothideomycetes;order:Pleosporales;family:Phaeosphaeriaceae;genus:Parastagonospora;species:Parastagonospora nodorum;	NA	NA	NA	0.754642	0.75142	0.724338	NA	NA	NA
2598192	cellobiase	Cochliobolus heterostrophus	Carbon Cycling	Carbon degradation	Cellulose	superkingdom:Eukaryota;kingdom:Fungi;phylum:Ascomycota;class:Dothideomycetes;order:Pleosporales;family:Pleosporaceae;genus:Cochliobolus;	1.27252	1.25298	1.26972	1.27661	1.29674	1.29351	1.25983	1.24832	1.27845
189210447	cellobiase	Pyrenophora tritici-repentis Pt-1C-BFP	Carbon Cycling	Carbon degradation	Cellulose	superkingdom:Eukaryota;kingdom:Fungi;phylum:Ascomycota;class:Dothideomycetes;order:Pleosporales;family:Pleosporaceae;genus:Pyrenophora;species:Pyrenophora tritici-repentis;	1.13413	1.01418	0.993827	1.02103	1.04698	1.14059	1.0612	0.947062	1.07601
189188436	cellobiase	Pyrenophora tritici-repentis Pt-1C-BFP	Carbon Cycling	Carbon degradation	Cellulose	superkingdom:Eukaryota;kingdom:Fungi;phylum:Ascomycota;class:Dothideomycetes;order:Pleosporales;family:Pleosporaceae;genus:Pyrenophora;species:Pyrenophora tritici-repentis;	0.916818	0.892521	0.897628	0.960621	0.925184	0.944579	0.919727	0.969999	0.943522
189206824	cellobiase	Pyrenophora tritici-repentis Pt-1C-BFP	Carbon Cycling	Carbon degradation	Cellulose	superkingdom:Eukaryota;kingdom:Fungi;phylum:Ascomycota;class:Dothideomycetes;order:Pleosporales;family:Pleosporaceae;genus:Pyrenophora;species:Pyrenophora tritici-repentis;	0.979939	0.998709	0.975671	1.08653	1.02828	1.05665	0.988015	1.02265	1.02813
189203279	cellobiase	Pyrenophora tritici-repentis Pt-1C-BFP	Carbon Cycling	Carbon degradation	Cellulose	superkingdom:Eukaryota;kingdom:Fungi;phylum:Ascomycota;class:Dothideomycetes;order:Pleosporales;family:Pleosporaceae;genus:Pyrenophora;species:Pyrenophora tritici-repentis;	0.816964	NA	0.793864	NA	0.909945	0.771268	NA	NA	NA
187977648	cellobiase	Pyrenophora tritici-repentis Pt-1C-BFP	Carbon Cycling	Carbon degradation	Cellulose	superkingdom:Eukaryota;kingdom:Fungi;phylum:Ascomycota;class:Dothideomycetes;order:Pleosporales;family:Pleosporaceae;genus:Pyrenophora;species:Pyrenophora tritici-repentis;	NA	NA	NA	0.712066	0.897093	NA	NA	NA	NA
189196937	cellobiase	Pyrenophora tritici-repentis Pt-1C-BFP	Carbon Cycling	Carbon degradation	Cellulose	superkingdom:Eukaryota;kingdom:Fungi;phylum:Ascomycota;class:Dothideomycetes;order:Pleosporales;family:Pleosporaceae;genus:Pyrenophora;species:Pyrenophora tritici-repentis;	NA	NA	NA	0.782072	0.902718	0.893502	NA	NA	NA
189208602	cellobiase	Pyrenophora tritici-repentis Pt-1C-BFP	Carbon Cycling	Carbon degradation	Cellulose	superkingdom:Eukaryota;kingdom:Fungi;phylum:Ascomycota;class:Dothideomycetes;order:Pleosporales;family:Pleosporaceae;genus:Pyrenophora;species:Pyrenophora tritici-repentis;	NA	NA	NA	0.749637	0.800712	0.785336	NA	NA	NA
189198678b	cellobiase	Pyrenophora tritici-repentis Pt-1C-BFP	Carbon Cycling	Carbon degradation	Cellulose	superkingdom:Eukaryota;kingdom:Fungi;phylum:Ascomycota;class:Dothideomycetes;order:Pleosporales;family:Pleosporaceae;genus:Pyrenophora;species:Pyrenophora tritici-repentis;	1.34286	1.21099	1.22041	1.14801	1.22927	1.34217	1.28075	1.06977	1.28096
254674400	cellobiase	Aspergillus niger	Carbon Cycling	Carbon degradation	Cellulose	superkingdom:Eukaryota;kingdom:Fungi;phylum:Ascomycota;class:Eurotiomycetes;order:Eurotiales;family:Trichocomaceae;genus:Aspergillus;	0.875543	0.838143	0.857431	0.901867	0.861076	0.866084	0.876978	0.953494	0.875597
134075486	cellobiase	Aspergillus niger	Carbon Cycling	Carbon degradation	Cellulose	superkingdom:Eukaryota;kingdom:Fungi;phylum:Ascomycota;class:Eurotiomycetes;order:Eurotiales;family:Trichocomaceae;genus:Aspergillus;	1.04299	1.03368	1.04342	1.15753	1.07752	1.09886	1.03367	1.11143	1.08484
121705978a	cellobiase	Aspergillus clavatus NRRL 1	Carbon Cycling	Carbon degradation	Cellulose	superkingdom:Eukaryota;kingdom:Fungi;phylum:Ascomycota;class:Eurotiomycetes;order:Eurotiales;family:Trichocomaceae;genus:Aspergillus;species:Aspergillus clavatus;	0.997681	1.03134	1.0024	1.07524	1.02093	1.02981	0.977486	0.999723	1.03419
121712846	cellobiase	Aspergillus clavatus NRRL 1	Carbon Cycling	Carbon degradation	Cellulose	superkingdom:Eukaryota;kingdom:Fungi;phylum:Ascomycota;class:Eurotiomycetes;order:Eurotiales;family:Trichocomaceae;genus:Aspergillus;species:Aspergillus clavatus;	0.812429	0.881395	0.851071	0.97241	0.843345	0.889204	0.810532	0.939407	0.894799
121700749	cellobiase	Aspergillus clavatus NRRL 1	Carbon Cycling	Carbon degradation	Cellulose	superkingdom:Eukaryota;kingdom:Fungi;phylum:Ascomycota;class:Eurotiomycetes;order:Eurotiales;family:Trichocomaceae;genus:Aspergillus;species:Aspergillus clavatus;	0.822055	0.831404	NA	0.775604	0.856129	0.824516	0.832975	NA	0.841159
121705978b	cellobiase	Aspergillus clavatus NRRL 1	Carbon Cycling	Carbon degradation	Cellulose	superkingdom:Eukaryota;kingdom:Fungi;phylum:Ascomycota;class:Eurotiomycetes;order:Eurotiales;family:Trichocomaceae;genus:Aspergillus;species:Aspergillus clavatus;	0.88747	0.856823	0.84299	0.840837	0.791972	0.864749	0.853722	NA	0.898304
121699673a	cellobiase	Aspergillus clavatus NRRL 1	Carbon Cycling	Carbon degradation	Cellulose	superkingdom:Eukaryota;kingdom:Fungi;phylum:Ascomycota;class:Eurotiomycetes;order:Eurotiales;family:Trichocomaceae;genus:Aspergillus;species:Aspergillus clavatus;	1.07162	1.01505	1.06656	1.08316	1.02939	1.08017	1.00814	1.01937	1.06605
121712868a	cellobiase	Aspergillus clavatus NRRL 1	Carbon Cycling	Carbon degradation	Cellulose	superkingdom:Eukaryota;kingdom:Fungi;phylum:Ascomycota;class:Eurotiomycetes;order:Eurotiales;family:Trichocomaceae;genus:Aspergillus;species:Aspergillus clavatus;	0.810011	NA	0.838895	0.712776	0.857673	0.772458	0.787454	0.818482	NA
121702635	cellobiase	Aspergillus clavatus NRRL 1	Carbon Cycling	Carbon degradation	Cellulose	superkingdom:Eukaryota;kingdom:Fungi;phylum:Ascomycota;class:Eurotiomycetes;order:Eurotiales;family:Trichocomaceae;genus:Aspergillus;species:Aspergillus clavatus;	0.996284	0.987331	0.993646	1.05318	0.974658	1.0331	1.00619	1.02909	1.03261
121701041	cellobiase	Aspergillus clavatus NRRL 1	Carbon Cycling	Carbon degradation	Cellulose	superkingdom:Eukaryota;kingdom:Fungi;phylum:Ascomycota;class:Eurotiomycetes;order:Eurotiales;family:Trichocomaceae;genus:Aspergillus;species:Aspergillus clavatus;	1.26511	1.25499	1.31348	1.20407	1.24523	1.25539	1.25953	1.2512	1.28849
121699673b	cellobiase	Aspergillus clavatus NRRL 1	Carbon Cycling	Carbon degradation	Cellulose	superkingdom:Eukaryota;kingdom:Fungi;phylum:Ascomycota;class:Eurotiomycetes;order:Eurotiales;family:Trichocomaceae;genus:Aspergillus;species:Aspergillus clavatus;	0.783899	0.805613	0.832327	0.887272	0.775043	0.849537	0.831609	0.880602	0.875082
119402187	cellobiase	Aspergillus clavatus NRRL 1	Carbon Cycling	Carbon degradation	Cellulose	superkingdom:Eukaryota;kingdom:Fungi;phylum:Ascomycota;class:Eurotiomycetes;order:Eurotiales;family:Trichocomaceae;genus:Aspergillus;species:Aspergillus clavatus;	1.10712	0.982058	1.02379	1.00796	1.1894	1.10486	1.16942	1.01134	1.15366
220694706	cellobiase	Aspergillus flavus NRRL3357	Carbon Cycling	Carbon degradation	Cellulose	superkingdom:Eukaryota;kingdom:Fungi;phylum:Ascomycota;class:Eurotiomycetes;order:Eurotiales;family:Trichocomaceae;genus:Aspergillus;species:Aspergillus flavus;	1.08903	1.06679	1.06928	1.07814	1.13045	1.14513	1.08745	0.927165	1.10479
70992949a	cellobiase	Aspergillus fumigatus Af293	Carbon Cycling	Carbon degradation	Cellulose	superkingdom:Eukaryota;kingdom:Fungi;phylum:Ascomycota;class:Eurotiomycetes;order:Eurotiales;family:Trichocomaceae;genus:Aspergillus;species:Aspergillus fumigatus;	0.810421	0.889263	0.809337	NA	0.748953	0.836719	0.777034	NA	0.792863
70998408a	cellobiase	Aspergillus fumigatus Af293	Carbon Cycling	Carbon degradation	Cellulose	superkingdom:Eukaryota;kingdom:Fungi;phylum:Ascomycota;class:Eurotiomycetes;order:Eurotiales;family:Trichocomaceae;genus:Aspergillus;species:Aspergillus fumigatus;	NA	NA	NA	0.718509	NA	0.752747	NA	NA	NA
70990956	cellobiase	Aspergillus fumigatus Af293	Carbon Cycling	Carbon degradation	Cellulose	superkingdom:Eukaryota;kingdom:Fungi;phylum:Ascomycota;class:Eurotiomycetes;order:Eurotiales;family:Trichocomaceae;genus:Aspergillus;species:Aspergillus fumigatus;	0.780773	0.8123	NA	NA	0.793936	0.858034	0.777112	0.849588	0.820013
145235531a	cellobiase	Aspergillus niger	Carbon Cycling	Carbon degradation	Cellulose	superkingdom:Eukaryota;kingdom:Fungi;phylum:Ascomycota;class:Eurotiomycetes;order:Eurotiales;family:Trichocomaceae;genus:Aspergillus;species:Aspergillus niger;	0.93722	0.886212	0.99347	0.976426	1.0503	1.05775	0.948662	0.891182	1.0186
145240583a	cellobiase	Aspergillus niger	Carbon Cycling	Carbon degradation	Cellulose	superkingdom:Eukaryota;kingdom:Fungi;phylum:Ascomycota;class:Eurotiomycetes;order:Eurotiales;family:Trichocomaceae;genus:Aspergillus;species:Aspergillus niger;	NA	NA	NA	0.74892	0.72372	NA	NA	NA	NA
145253493a	cellobiase	Aspergillus niger	Carbon Cycling	Carbon degradation	Cellulose	superkingdom:Eukaryota;kingdom:Fungi;phylum:Ascomycota;class:Eurotiomycetes;order:Eurotiales;family:Trichocomaceae;genus:Aspergillus;species:Aspergillus niger;	0.806484	0.814103	0.732013	0.685297	0.791779	0.795686	0.785227	NA	0.828592
145253493b	cellobiase	Aspergillus niger	Carbon Cycling	Carbon degradation	Cellulose	superkingdom:Eukaryota;kingdom:Fungi;phylum:Ascomycota;class:Eurotiomycetes;order:Eurotiales;family:Trichocomaceae;genus:Aspergillus;species:Aspergillus niger;	0.978918	0.977042	0.992869	0.908936	0.900301	0.970154	0.929559	0.91337	0.909972
145238806a	cellobiase	Aspergillus niger	Carbon Cycling	Carbon degradation	Cellulose	superkingdom:Eukaryota;kingdom:Fungi;phylum:Ascomycota;class:Eurotiomycetes;order:Eurotiales;family:Trichocomaceae;genus:Aspergillus;species:Aspergillus niger;	1.19746	1.07921	1.12767	1.07834	1.09978	1.19694	1.10173	0.963811	1.11739
145238806b	cellobiase	Aspergillus niger	Carbon Cycling	Carbon degradation	Cellulose	superkingdom:Eukaryota;kingdom:Fungi;phylum:Ascomycota;class:Eurotiomycetes;order:Eurotiales;family:Trichocomaceae;genus:Aspergillus;species:Aspergillus niger;	1.16792	1.07251	1.10664	1.14089	1.20467	1.21941	1.12408	1.12227	1.2071
145235531b	cellobiase	Aspergillus niger	Carbon Cycling	Carbon degradation	Cellulose	superkingdom:Eukaryota;kingdom:Fungi;phylum:Ascomycota;class:Eurotiomycetes;order:Eurotiales;family:Trichocomaceae;genus:Aspergillus;species:Aspergillus niger;	NA	NA	NA	0.719481	0.731881	0.77839	NA	NA	NA
115437930a	cellobiase	Aspergillus terreus NIH2624	Carbon Cycling	Carbon degradation	Cellulose	superkingdom:Eukaryota;kingdom:Fungi;phylum:Ascomycota;class:Eurotiomycetes;order:Eurotiales;family:Trichocomaceae;genus:Aspergillus;species:Aspergillus terreus;	0.862215	0.833291	0.835967	0.853229	0.893638	0.86045	0.852663	NA	0.846037
115433022	cellobiase	Aspergillus terreus NIH2624	Carbon Cycling	Carbon degradation	Cellulose	superkingdom:Eukaryota;kingdom:Fungi;phylum:Ascomycota;class:Eurotiomycetes;order:Eurotiales;family:Trichocomaceae;genus:Aspergillus;species:Aspergillus terreus;	0.763707	0.815261	0.784585	0.754802	NA	0.763846	0.784305	NA	0.795968
115437930b	cellobiase	Aspergillus terreus NIH2624	Carbon Cycling	Carbon degradation	Cellulose	superkingdom:Eukaryota;kingdom:Fungi;phylum:Ascomycota;class:Eurotiomycetes;order:Eurotiales;family:Trichocomaceae;genus:Aspergillus;species:Aspergillus terreus;	NA	NA	NA	NA	NA	NA	NA	0.811957	0.834184
115401928	cellobiase	Aspergillus terreus NIH2624	Carbon Cycling	Carbon degradation	Cellulose	superkingdom:Eukaryota;kingdom:Fungi;phylum:Ascomycota;class:Eurotiomycetes;order:Eurotiales;family:Trichocomaceae;genus:Aspergillus;species:Aspergillus terreus;	1.05873	1.01881	1.09631	0.988325	1.07874	1.04295	0.951576	1.07886	0.99075
67526983a	cellobiase	Aspergillus nidulans FGSC A4	Carbon Cycling	Carbon degradation	Cellulose	superkingdom:Eukaryota;kingdom:Fungi;phylum:Ascomycota;class:Eurotiomycetes;order:Eurotiales;family:Trichocomaceae;genus:Emericella;species:Emericella nidulans;	NA	NA	NA	NA	0.752053	0.795058	NA	NA	NA
67526983b	cellobiase	Aspergillus nidulans FGSC A4	Carbon Cycling	Carbon degradation	Cellulose	superkingdom:Eukaryota;kingdom:Fungi;phylum:Ascomycota;class:Eurotiomycetes;order:Eurotiales;family:Trichocomaceae;genus:Emericella;species:Emericella nidulans;	0.889375	0.85183	0.852595	0.856999	0.759592	0.905528	0.800945	0.811018	0.845324
67523523	cellobiase	Aspergillus nidulans FGSC A4	Carbon Cycling	Carbon degradation	Cellulose	superkingdom:Eukaryota;kingdom:Fungi;phylum:Ascomycota;class:Eurotiomycetes;order:Eurotiales;family:Trichocomaceae;genus:Emericella;species:Emericella nidulans;	0.902388	0.824772	0.828945	0.75332	0.90657	0.924349	0.989519	0.829382	NA
70996502b	cellobiase	Aspergillus fumigatus Af293	Carbon Cycling	Carbon degradation	Cellulose	superkingdom:Eukaryota;kingdom:Fungi;phylum:Ascomycota;class:Eurotiomycetes;order:Eurotiales;family:Trichocomaceae;genus:Neosartorya;species:Aspergillus fumigatus;	0.951994	0.969162	0.94756	0.989361	0.944474	0.96123	0.921975	0.967598	0.951734
70982754	cellobiase	Aspergillus fumigatus Af293	Carbon Cycling	Carbon degradation	Cellulose	superkingdom:Eukaryota;kingdom:Fungi;phylum:Ascomycota;class:Eurotiomycetes;order:Eurotiales;family:Trichocomaceae;genus:Neosartorya;species:Aspergillus fumigatus;	1.23436	1.20171	1.23517	1.23186	1.27243	1.23713	1.27233	1.16142	1.25393
70991821	cellobiase	Aspergillus fumigatus Af293	Carbon Cycling	Carbon degradation	Cellulose	superkingdom:Eukaryota;kingdom:Fungi;phylum:Ascomycota;class:Eurotiomycetes;order:Eurotiales;family:Trichocomaceae;genus:Neosartorya;species:Aspergillus fumigatus;	1.02451	1.04396	1.05992	1.11714	1.02848	1.05464	1.04529	1.09089	1.10698
70992949b	cellobiase	Aspergillus fumigatus Af293	Carbon Cycling	Carbon degradation	Cellulose	superkingdom:Eukaryota;kingdom:Fungi;phylum:Ascomycota;class:Eurotiomycetes;order:Eurotiales;family:Trichocomaceae;genus:Neosartorya;species:Aspergillus fumigatus;	0.901854	0.917353	0.894009	1.0082	0.924114	0.932763	0.92384	0.972061	0.917523
119473354	cellobiase	Neosartorya fischeri NRRL 181	Carbon Cycling	Carbon degradation	Cellulose	superkingdom:Eukaryota;kingdom:Fungi;phylum:Ascomycota;class:Eurotiomycetes;order:Eurotiales;family:Trichocomaceae;genus:Neosartorya;species:Neosartorya fischeri;	0.954901	0.892987	0.919313	0.952421	0.976547	0.974924	0.949557	0.844575	0.967772
119494976	cellobiase	Neosartorya fischeri NRRL 181	Carbon Cycling	Carbon degradation	Cellulose	superkingdom:Eukaryota;kingdom:Fungi;phylum:Ascomycota;class:Eurotiomycetes;order:Eurotiales;family:Trichocomaceae;genus:Neosartorya;species:Neosartorya fischeri;	0.969623	0.965136	0.983591	1.05601	0.918652	0.962601	0.863688	1.03418	0.954435
119469897a	cellobiase	Neosartorya fischeri NRRL 181	Carbon Cycling	Carbon degradation	Cellulose	superkingdom:Eukaryota;kingdom:Fungi;phylum:Ascomycota;class:Eurotiomycetes;order:Eurotiales;family:Trichocomaceae;genus:Neosartorya;species:Neosartorya fischeri;	0.829415	NA	0.879825	0.85006	0.922432	0.851675	NA	0.792333	0.847048
119479867	cellobiase	Neosartorya fischeri NRRL 181	Carbon Cycling	Carbon degradation	Cellulose	superkingdom:Eukaryota;kingdom:Fungi;phylum:Ascomycota;class:Eurotiomycetes;order:Eurotiales;family:Trichocomaceae;genus:Neosartorya;species:Neosartorya fischeri;	0.920951	0.810703	0.885633	0.920157	0.94029	0.894256	0.866935	0.816863	0.85231
119491164	cellobiase	Neosartorya fischeri NRRL 181	Carbon Cycling	Carbon degradation	Cellulose	superkingdom:Eukaryota;kingdom:Fungi;phylum:Ascomycota;class:Eurotiomycetes;order:Eurotiales;family:Trichocomaceae;genus:Neosartorya;species:Neosartorya fischeri;	NA	NA	NA	0.698201	0.871315	NA	NA	NA	NA
119469897b	cellobiase	Neosartorya fischeri NRRL 181	Carbon Cycling	Carbon degradation	Cellulose	superkingdom:Eukaryota;kingdom:Fungi;phylum:Ascomycota;class:Eurotiomycetes;order:Eurotiales;family:Trichocomaceae;genus:Neosartorya;species:Neosartorya fischeri;	0.858449	0.797138	0.800262	0.908501	0.848874	0.864175	0.844685	0.90746	0.867206
284181765	cellobiase	Penicillium decumbens	Carbon Cycling	Carbon degradation	Cellulose	superkingdom:Eukaryota;kingdom:Fungi;phylum:Ascomycota;class:Eurotiomycetes;order:Eurotiales;family:Trichocomaceae;genus:Penicillium;	1.05991	0.922742	0.975212	0.911683	1.12884	1.00482	0.943803	0.94083	1.02498
211583958	cellobiase	Penicillium chrysogenum Wisconsin 54-1255	Carbon Cycling	Carbon degradation	Cellulose	superkingdom:Eukaryota;kingdom:Fungi;phylum:Ascomycota;class:Eurotiomycetes;order:Eurotiales;family:Trichocomaceae;genus:Penicillium;species:Penicillium chrysogenum;	1.04951	1.02521	1.04456	1.0714	1.09446	1.0555	1.06595	0.898681	1.07267
211588246	cellobiase	Penicillium chrysogenum Wisconsin 54-1255	Carbon Cycling	Carbon degradation	Cellulose	superkingdom:Eukaryota;kingdom:Fungi;phylum:Ascomycota;class:Eurotiomycetes;order:Eurotiales;family:Trichocomaceae;genus:Penicillium;species:Penicillium chrysogenum;	0.98749	0.990346	0.995602	1.06384	1.02919	1.01646	0.970361	1.03422	0.994056
255932921a	cellobiase	Penicillium chrysogenum Wisconsin 54-1255	Carbon Cycling	Carbon degradation	Cellulose	superkingdom:Eukaryota;kingdom:Fungi;phylum:Ascomycota;class:Eurotiomycetes;order:Eurotiales;family:Trichocomaceae;genus:Penicillium;species:Penicillium chrysogenum;	0.821881	0.883473	0.840951	0.953856	0.842604	0.833365	0.814092	0.93503	0.909668
255949250	cellobiase	Penicillium chrysogenum Wisconsin 54-1255	Carbon Cycling	Carbon degradation	Cellulose	superkingdom:Eukaryota;kingdom:Fungi;phylum:Ascomycota;class:Eurotiomycetes;order:Eurotiales;family:Trichocomaceae;genus:Penicillium;species:Penicillium chrysogenum;	1.0636	0.987781	1.05615	0.967169	1.09531	1.02346	0.9767	1.01395	0.940955
211592468	cellobiase	Penicillium chrysogenum Wisconsin 54-1255	Carbon Cycling	Carbon degradation	Cellulose	superkingdom:Eukaryota;kingdom:Fungi;phylum:Ascomycota;class:Eurotiomycetes;order:Eurotiales;family:Trichocomaceae;genus:Penicillium;species:Penicillium chrysogenum;	1.00152	0.995492	0.975748	1.08858	1.02337	1.06759	0.988783	1.06041	1.03126
255931379	cellobiase	Penicillium chrysogenum Wisconsin 54-1255	Carbon Cycling	Carbon degradation	Cellulose	superkingdom:Eukaryota;kingdom:Fungi;phylum:Ascomycota;class:Eurotiomycetes;order:Eurotiales;family:Trichocomaceae;genus:Penicillium;species:Penicillium chrysogenum;	0.822206	0.777318	0.809929	0.732959	0.79705	0.791242	0.757295	NA	0.828369
211593329	cellobiase	Penicillium chrysogenum Wisconsin 54-1255	Carbon Cycling	Carbon degradation	Cellulose	superkingdom:Eukaryota;kingdom:Fungi;phylum:Ascomycota;class:Eurotiomycetes;order:Eurotiales;family:Trichocomaceae;genus:Penicillium;species:Penicillium chrysogenum;	0.80939	0.804766	0.794496	0.736662	0.806664	0.813349	0.826236	NA	0.823177
212527864	cellobiase	Penicillium marneffei ATCC 18224	Carbon Cycling	Carbon degradation	Cellulose	superkingdom:Eukaryota;kingdom:Fungi;phylum:Ascomycota;class:Eurotiomycetes;order:Eurotiales;family:Trichocomaceae;genus:Penicillium;species:Penicillium marneffei;	1.34019	1.31078	1.25831	1.3101	1.33027	1.3619	1.3197	1.16397	1.33853
212535192	cellobiase	Penicillium marneffei ATCC 18224	Carbon Cycling	Carbon degradation	Cellulose	superkingdom:Eukaryota;kingdom:Fungi;phylum:Ascomycota;class:Eurotiomycetes;order:Eurotiales;family:Trichocomaceae;genus:Penicillium;species:Penicillium marneffei;	0.800526	0.85544	0.85456	0.938134	0.813035	0.851193	0.833738	0.927946	0.862219
212546891a	cellobiase	Penicillium marneffei ATCC 18224	Carbon Cycling	Carbon degradation	Cellulose	superkingdom:Eukaryota;kingdom:Fungi;phylum:Ascomycota;class:Eurotiomycetes;order:Eurotiales;family:Trichocomaceae;genus:Penicillium;species:Penicillium marneffei;	0.910302	0.896482	0.890139	0.891375	0.893141	0.932012	0.894042	0.879509	0.905099
212530388a	cellobiase	Penicillium marneffei ATCC 18224	Carbon Cycling	Carbon degradation	Cellulose	superkingdom:Eukaryota;kingdom:Fungi;phylum:Ascomycota;class:Eurotiomycetes;order:Eurotiales;family:Trichocomaceae;genus:Penicillium;species:Penicillium marneffei;	0.836658	NA	0.844647	NA	NA	NA	NA	NA	NA
212538609a	cellobiase	Penicillium marneffei ATCC 18224	Carbon Cycling	Carbon degradation	Cellulose	superkingdom:Eukaryota;kingdom:Fungi;phylum:Ascomycota;class:Eurotiomycetes;order:Eurotiales;family:Trichocomaceae;genus:Penicillium;species:Penicillium marneffei;	1.13233	1.16135	1.1731	1.13653	1.12075	1.12117	1.12847	1.12634	1.14791
212533495	cellobiase	Penicillium marneffei ATCC 18224	Carbon Cycling	Carbon degradation	Cellulose	superkingdom:Eukaryota;kingdom:Fungi;phylum:Ascomycota;class:Eurotiomycetes;order:Eurotiales;family:Trichocomaceae;genus:Penicillium;species:Penicillium marneffei;	1.00427	0.845258	0.854672	0.950519	1.00693	0.982983	0.965764	0.817718	1.00982
212540774b	cellobiase	Penicillium marneffei ATCC 18224	Carbon Cycling	Carbon degradation	Cellulose	superkingdom:Eukaryota;kingdom:Fungi;phylum:Ascomycota;class:Eurotiomycetes;order:Eurotiales;family:Trichocomaceae;genus:Talaromyces;species:Talaromyces marneffei;	NA	NA	NA	0.772267	0.789275	0.750724	NA	NA	NA
212538609b	cellobiase	Penicillium marneffei ATCC 18224	Carbon Cycling	Carbon degradation	Cellulose	superkingdom:Eukaryota;kingdom:Fungi;phylum:Ascomycota;class:Eurotiomycetes;order:Eurotiales;family:Trichocomaceae;genus:Talaromyces;species:Talaromyces marneffei;	0.945708	0.995674	0.968079	0.951409	0.897804	0.980431	0.923763	0.976085	0.936741
242778239	cellobiase	Talaromyces stipitatus ATCC 10500	Carbon Cycling	Carbon degradation	Cellulose	superkingdom:Eukaryota;kingdom:Fungi;phylum:Ascomycota;class:Eurotiomycetes;order:Eurotiales;family:Trichocomaceae;genus:Talaromyces;species:Talaromyces stipitatus;	1.17832	1.21617	1.22577	1.29681	1.20124	1.16111	1.21118	1.22686	1.25311
242773185	cellobiase	Talaromyces stipitatus ATCC 10500	Carbon Cycling	Carbon degradation	Cellulose	superkingdom:Eukaryota;kingdom:Fungi;phylum:Ascomycota;class:Eurotiomycetes;order:Eurotiales;family:Trichocomaceae;genus:Talaromyces;species:Talaromyces stipitatus;	0.827949	NA	0.892666	0.70495	NA	0.751938	NA	0.78628	0.814266
242784870	cellobiase	Talaromyces stipitatus ATCC 10500	Carbon Cycling	Carbon degradation	Cellulose	superkingdom:Eukaryota;kingdom:Fungi;phylum:Ascomycota;class:Eurotiomycetes;order:Eurotiales;family:Trichocomaceae;genus:Talaromyces;species:Talaromyces stipitatus;	1.00057	0.981524	0.993983	1.05744	1.02998	1.03802	0.994591	1.06798	1.03183
242792313	cellobiase	Talaromyces stipitatus ATCC 10500	Carbon Cycling	Carbon degradation	Cellulose	superkingdom:Eukaryota;kingdom:Fungi;phylum:Ascomycota;class:Eurotiomycetes;order:Eurotiales;family:Trichocomaceae;genus:Talaromyces;species:Talaromyces stipitatus;	0.764331	0.762511	0.733162	0.747794	0.761705	0.805068	0.797152	NA	0.824434
261189963b	cellobiase	Ajellomyces dermatitidis SLH14081	Carbon Cycling	Carbon degradation	Cellulose	superkingdom:Eukaryota;kingdom:Fungi;phylum:Ascomycota;class:Eurotiomycetes;order:Onygenales;family:Ajellomycetaceae;genus:Ajellomyces;species:Ajellomyces dermatitidis;	0.811261	0.850813	0.857631	0.821501	0.855913	0.760812	0.837597	0.933372	0.863045
261205350a	cellobiase	Ajellomyces dermatitidis SLH14081	Carbon Cycling	Carbon degradation	Cellulose	superkingdom:Eukaryota;kingdom:Fungi;phylum:Ascomycota;class:Eurotiomycetes;order:Onygenales;family:Ajellomycetaceae;genus:Ajellomyces;species:Ajellomyces dermatitidis;	0.970229	1.06745	1.05204	1.15087	1.07146	1.09241	1.00835	1.10515	1.10394
261205350b	cellobiase	Ajellomyces dermatitidis SLH14081	Carbon Cycling	Carbon degradation	Cellulose	superkingdom:Eukaryota;kingdom:Fungi;phylum:Ascomycota;class:Eurotiomycetes;order:Onygenales;family:Ajellomycetaceae;genus:Ajellomyces;species:Ajellomyces dermatitidis;	1.04876	1.13984	1.10081	1.18012	1.08034	1.08017	1.07409	1.17018	1.15455
239587701	cellobiase	Ajellomyces dermatitidis SLH14081	Carbon Cycling	Carbon degradation	Cellulose	superkingdom:Eukaryota;kingdom:Fungi;phylum:Ascomycota;class:Eurotiomycetes;order:Onygenales;family:Ajellomycetaceae;genus:Ajellomyces;species:Ajellomyces dermatitidis;	1.13353	1.0151	0.969917	0.991273	0.991766	1.12798	1.04572	0.851448	1.05207
311339184	cellobiase	Arthroderma gypseum CBS 118893	Carbon Cycling	Carbon degradation	Cellulose	superkingdom:Eukaryota;kingdom:Fungi;phylum:Ascomycota;class:Eurotiomycetes;order:Onygenales;family:Arthrodermataceae;genus:Arthroderma;species:Arthroderma gypseum;	0.86878	0.866214	0.8878	1.00556	0.878816	0.931459	0.88869	0.976343	0.959443
296825494	cellobiase	Arthroderma otae CBS 113480	Carbon Cycling	Carbon degradation	Cellulose	superkingdom:Eukaryota;kingdom:Fungi;phylum:Ascomycota;class:Eurotiomycetes;order:Onygenales;family:Arthrodermataceae;genus:Arthroderma;species:Arthroderma otae;	1.11601	1.07941	1.10886	1.18801	1.10746	1.14953	1.12827	1.12989	1.14879
302666070b	cellobiase	Trichophyton verrucosum HKI 0517	Carbon Cycling	Carbon degradation	Cellulose	superkingdom:Eukaryota;kingdom:Fungi;phylum:Ascomycota;class:Eurotiomycetes;order:Onygenales;family:Arthrodermataceae;genus:Trichophyton;species:Trichophyton verrucosum;	NA	NA	NA	0.710387	0.806572	NA	0.797452	0.766278	NA
258576755	cellobiase	Uncinocarpus reesii 1704	Carbon Cycling	Carbon degradation	Cellulose	superkingdom:Eukaryota;kingdom:Fungi;phylum:Ascomycota;class:Eurotiomycetes;order:Onygenales;family:Onygenaceae;genus:Uncinocarpus;species:Uncinocarpus reesii;	1.08053	1.11083	1.06477	1.19582	1.08711	1.09531	1.09376	1.16731	1.15958
6456799	cellobiase	Botryotinia fuckeliana	Carbon Cycling	Carbon degradation	Cellulose	superkingdom:Eukaryota;kingdom:Fungi;phylum:Ascomycota;class:Leotiomycetes;order:Helotiales;family:Sclerotiniaceae;genus:Botryotinia;	0.863648	0.881217	0.879252	0.876081	0.799798	0.890624	0.840568	0.841084	0.873172
49650741	cellobiase	Yarrowia lipolytica	Carbon Cycling	Carbon degradation	Cellulose	superkingdom:Eukaryota;kingdom:Fungi;phylum:Ascomycota;class:Saccharomycetes;order:Saccharomycetales;family:Dipodascaceae;genus:Yarrowia;	0.9065	0.765329	0.883651	0.775163	0.971392	0.901221	0.833688	0.828688	0.921774
565664	cellobiase	Kuraishia capsulata	Carbon Cycling	Carbon degradation	Cellulose	superkingdom:Eukaryota;kingdom:Fungi;phylum:Ascomycota;class:Saccharomycetes;order:Saccharomycetales;family:Saccharomycetaceae;genus:Kuraishia;	0.757814	NA	0.742854	0.740265	0.784493	0.73086	NA	NA	NA
170810a	cellobiase	Saccharomycopsis fibuligera	Carbon Cycling	Carbon degradation	Cellulose	superkingdom:Eukaryota;kingdom:Fungi;phylum:Ascomycota;class:Saccharomycetes;order:Saccharomycetales;family:Saccharomycopsidaceae;genus:Saccharomycopsis;	0.972706	0.963781	0.968278	0.998037	0.922463	0.969368	0.913985	0.967129	0.990766
199584262	cellobiase	Saccharomycopsis fibuligera	Carbon Cycling	Carbon degradation	Cellulose	superkingdom:Eukaryota;kingdom:Fungi;phylum:Ascomycota;class:Saccharomycetes;order:Saccharomycetales;family:Saccharomycopsidaceae;genus:Saccharomycopsis;	0.837055	0.824382	0.855067	0.809237	0.819572	0.884307	0.816906	0.871323	0.90586
241959388	cellobiase	Candida dubliniensis CD36	Carbon Cycling	Carbon degradation	Cellulose	superkingdom:Eukaryota;kingdom:Fungi;phylum:Ascomycota;class:Saccharomycetes;order:Saccharomycetales;genus:Candida;species:Candida dubliniensis;	0.90417	NA	0.873486	0.784519	0.908589	0.782948	0.890616	0.815886	0.773537
302420455	cellobiase	Verticillium albo-atrum VaMs.102	Carbon Cycling	Carbon degradation	Cellulose	superkingdom:Eukaryota;kingdom:Fungi;phylum:Ascomycota;class:Sordariomycetes;order:Glomerellales;family:Plectosphaerellaceae;genus:Verticilium;species:Verticillium albo-atrum;	0.924725	NA	0.883869	0.794109	0.974825	0.86913	0.788939	0.830905	0.777828
302407187	cellobiase	Verticillium albo-atrum VaMs.102	Carbon Cycling	Carbon degradation	Cellulose	superkingdom:Eukaryota;kingdom:Fungi;phylum:Ascomycota;class:Sordariomycetes;order:Glomerellales;family:Plectosphaerellaceae;genus:Verticilium;species:Verticillium albo-atrum;	1.09561	1.13464	1.19339	1.07733	1.12178	1.11579	1.09533	1.10607	1.11613
302407379	cellobiase	Verticillium albo-atrum VaMs.102	Carbon Cycling	Carbon degradation	Cellulose	superkingdom:Eukaryota;kingdom:Fungi;phylum:Ascomycota;class:Sordariomycetes;order:Glomerellales;family:Plectosphaerellaceae;genus:Verticilium;species:Verticillium albo-atrum;	1.04617	1.0296	1.03888	1.10245	1.0287	1.06712	1.02513	1.05742	1.06995
302406080	cellobiase	Verticillium albo-atrum VaMs.102	Carbon Cycling	Carbon degradation	Cellulose	superkingdom:Eukaryota;kingdom:Fungi;phylum:Ascomycota;class:Sordariomycetes;order:Glomerellales;family:Plectosphaerellaceae;genus:Verticilium;species:Verticillium albo-atrum;	0.955205	0.991788	0.956062	1.05857	0.986381	1.02647	0.95989	1.01169	0.992905
302416491	cellobiase	Verticillium albo-atrum VaMs.102	Carbon Cycling	Carbon degradation	Cellulose	superkingdom:Eukaryota;kingdom:Fungi;phylum:Ascomycota;class:Sordariomycetes;order:Glomerellales;family:Plectosphaerellaceae;genus:Verticilium;species:Verticillium albo-atrum;	1.18011	1.17352	1.1826	1.21299	1.20798	1.26403	1.16071	1.06647	1.18684
302404210	cellobiase	Verticillium albo-atrum VaMs.102	Carbon Cycling	Carbon degradation	Cellulose	superkingdom:Eukaryota;kingdom:Fungi;phylum:Ascomycota;class:Sordariomycetes;order:Glomerellales;family:Plectosphaerellaceae;genus:Verticilium;species:Verticillium albo-atrum;	0.829467	0.830385	0.857756	0.809511	0.859886	0.856188	0.841752	NA	0.84396
302418644	cellobiase	Verticillium albo-atrum VaMs.102	Carbon Cycling	Carbon degradation	Cellulose	superkingdom:Eukaryota;kingdom:Fungi;phylum:Ascomycota;class:Sordariomycetes;order:Glomerellales;family:Plectosphaerellaceae;genus:Verticilium;species:Verticillium albo-atrum;	0.937723	0.834817	1.03092	0.943237	1.00049	0.956781	0.91684	0.962545	0.886944
302407425	cellobiase	Verticillium albo-atrum VaMs.102	Carbon Cycling	Carbon degradation	Cellulose	superkingdom:Eukaryota;kingdom:Fungi;phylum:Ascomycota;class:Sordariomycetes;order:Glomerellales;family:Plectosphaerellaceae;genus:Verticilium;species:Verticillium albo-atrum;	0.996604	0.993605	1.04011	0.989623	1.01023	0.993977	0.948482	0.999255	0.936159
302417172	cellobiase	Verticillium albo-atrum VaMs.102	Carbon Cycling	Carbon degradation	Cellulose	superkingdom:Eukaryota;kingdom:Fungi;phylum:Ascomycota;class:Sordariomycetes;order:Glomerellales;family:Plectosphaerellaceae;genus:Verticilium;species:Verticillium albo-atrum;	NA	0.817652	0.862077	0.750352	0.819746	0.770411	0.791739	0.80292	0.798201
302413403	cellobiase	Verticillium albo-atrum VaMs.102	Carbon Cycling	Carbon degradation	Cellulose	superkingdom:Eukaryota;kingdom:Fungi;phylum:Ascomycota;class:Sordariomycetes;order:Glomerellales;family:Plectosphaerellaceae;genus:Verticilium;species:Verticillium albo-atrum;	1.03683	1.05825	0.908985	0.987003	1.01593	1.07648	1.06294	1.06752	1.09129
302417031	cellobiase	Verticillium albo-atrum VaMs.102	Carbon Cycling	Carbon degradation	Cellulose	superkingdom:Eukaryota;kingdom:Fungi;phylum:Ascomycota;class:Sordariomycetes;order:Glomerellales;family:Plectosphaerellaceae;genus:Verticilium;species:Verticillium albo-atrum;	1.10111	1.1544	1.17356	1.07655	1.18495	1.05474	1.24358	1.2218	1.15522
302416101	cellobiase	Verticillium albo-atrum VaMs.102	Carbon Cycling	Carbon degradation	Cellulose	superkingdom:Eukaryota;kingdom:Fungi;phylum:Ascomycota;class:Sordariomycetes;order:Glomerellales;family:Plectosphaerellaceae;genus:Verticilium;species:Verticillium albo-atrum;	NA	NA	NA	0.768393	0.76613	0.767658	NA	NA	NA
302413415	cellobiase	Verticillium albo-atrum VaMs.102	Carbon Cycling	Carbon degradation	Cellulose	superkingdom:Eukaryota;kingdom:Fungi;phylum:Ascomycota;class:Sordariomycetes;order:Glomerellales;family:Plectosphaerellaceae;genus:Verticilium;species:Verticillium albo-atrum;	0.874584	0.869247	0.938773	0.857417	0.937857	0.891062	0.85095	0.920734	0.903817
302420131	cellobiase	Verticillium albo-atrum VaMs.102	Carbon Cycling	Carbon degradation	Cellulose	superkingdom:Eukaryota;kingdom:Fungi;phylum:Ascomycota;class:Sordariomycetes;order:Glomerellales;family:Plectosphaerellaceae;genus:Verticilium;species:Verticillium albo-atrum;	0.839668	0.832607	0.874591	0.826412	0.851238	0.771221	0.797913	0.80886	0.828975
302422028	cellobiase	Verticillium albo-atrum VaMs.102	Carbon Cycling	Carbon degradation	Cellulose	superkingdom:Eukaryota;kingdom:Fungi;phylum:Ascomycota;class:Sordariomycetes;order:Glomerellales;family:Plectosphaerellaceae;genus:Verticilium;species:Verticillium albo-atrum;	1.14446	1.0531	1.03316	1.00628	1.02217	1.16149	1.12057	0.79762	1.15068
302413349	cellobiase	Verticillium albo-atrum VaMs.102	Carbon Cycling	Carbon degradation	Cellulose	superkingdom:Eukaryota;kingdom:Fungi;phylum:Ascomycota;class:Sordariomycetes;order:Glomerellales;family:Plectosphaerellaceae;genus:Verticilium;species:Verticillium albo-atrum;	1.27434	1.14491	1.14606	1.12462	1.24795	1.23054	1.14971	1.19838	1.10555
302408531b	cellobiase	Verticillium albo-atrum VaMs.102	Carbon Cycling	Carbon degradation	Cellulose	superkingdom:Eukaryota;kingdom:Fungi;phylum:Ascomycota;class:Sordariomycetes;order:Glomerellales;family:Plectosphaerellaceae;genus:Verticillium;species:Verticillium alfalfae;	0.795177	0.833918	0.810255	0.909128	0.832386	0.836849	0.781643	0.824915	0.840342
261354019	cellobiase	Verticillium albo-atrum VaMs.102	Carbon Cycling	Carbon degradation	Cellulose	superkingdom:Eukaryota;kingdom:Fungi;phylum:Ascomycota;class:Sordariomycetes;order:Glomerellales;family:Plectosphaerellaceae;genus:Verticillium;species:Verticillium alfalfae;	1.09147	1.00247	1.11337	0.980928	1.11069	0.944526	1.0896	1.0404	1.02312
302407830	cellobiase	Verticillium albo-atrum VaMs.102	Carbon Cycling	Carbon degradation	Cellulose	superkingdom:Eukaryota;kingdom:Fungi;phylum:Ascomycota;class:Sordariomycetes;order:Glomerellales;family:Plectosphaerellaceae;genus:Verticillium;species:Verticillium alfalfae;	1.04779	0.978855	1.10839	0.915859	1.12793	0.979366	1.00316	1.0262	0.946736
261351990	cellobiase	Verticillium albo-atrum VaMs.102	Carbon Cycling	Carbon degradation	Cellulose	superkingdom:Eukaryota;kingdom:Fungi;phylum:Ascomycota;class:Sordariomycetes;order:Glomerellales;family:Plectosphaerellaceae;genus:Verticillium;species:Verticillium alfalfae;	0.92483	0.900994	0.924347	0.95933	0.992567	0.958437	0.940111	0.853519	0.923458
46128463	cellobiase	Gibberella zeae PH-1	Carbon Cycling	Carbon degradation	Cellulose	superkingdom:Eukaryota;kingdom:Fungi;phylum:Ascomycota;class:Sordariomycetes;order:Hypocreales;family:Nectriaceae;genus:Gibberella;species:Gibberella zeae;	1.03683	1.00183	1.00773	1.10692	1.03865	1.06471	1.01136	1.02898	1.05434
302918152b	cellobiase	Nectria haematococca mpVI 77-13-4	Carbon Cycling	Carbon degradation	Cellulose	superkingdom:Eukaryota;kingdom:Fungi;phylum:Ascomycota;class:Sordariomycetes;order:Hypocreales;family:Nectriaceae;genus:Nectria;species:Nectria haematococca;	1.27388	1.24619	1.25953	1.2997	1.26663	1.25016	1.25581	1.15172	1.31569
145613742	cellobiase	Magnaporthe oryzae 70-15	Carbon Cycling	Carbon degradation	Cellulose	superkingdom:Eukaryota;kingdom:Fungi;phylum:Ascomycota;class:Sordariomycetes;order:Magnaporthales;family:Magnaporthaceae;genus:Magnaporthe;species:Magnaporthe oryzae;	1.05447	1.03924	1.00868	0.954534	0.986694	1.05462	1.02027	1.0201	0.979389
145020773	cellobiase	Magnaporthe grisea 70-15	Carbon Cycling	Carbon degradation	Cellulose	superkingdom:Eukaryota;kingdom:Fungi;phylum:Ascomycota;class:Sordariomycetes;order:Magnaporthales;family:Magnaporthaceae;genus:Magnaporthe;species:Magnaporthe oryzae;	0.982295	0.893331	0.868725	0.841577	1.03042	0.93531	0.84597	0.889041	0.872684
162317552	cellobiase	Periconia sp. BCC 2871	Carbon Cycling	Carbon degradation	Cellulose	superkingdom:Eukaryota;kingdom:Fungi;phylum:Ascomycota;class:Sordariomycetes;order:Microascales;family:Halosphaeriaceae;genus:Periconia;	1.00076	0.976395	0.995971	1.07039	1.01186	1.01248	0.954825	1.0396	1.02851
225590470	cellobiase	Chaetomium thermophilum	Carbon Cycling	Carbon degradation	Cellulose	superkingdom:Eukaryota;kingdom:Fungi;phylum:Ascomycota;class:Sordariomycetes;order:Sordariales;family:Chaetomiaceae;genus:Chaetomium;	1.0171	0.941693	0.968722	0.860865	0.984392	0.925299	0.978121	0.882824	0.90414
114324585	cellobiase	Chaetomium thermophilum	Carbon Cycling	Carbon degradation	Cellulose	superkingdom:Eukaryota;kingdom:Fungi;phylum:Ascomycota;class:Sordariomycetes;order:Sordariales;family:Chaetomiaceae;genus:Chaetomium;	1.26886	1.18162	1.17606	1.18434	1.12593	1.29625	1.23379	0.861552	1.23152
116194216	cellobiase	Chaetomium globosum CBS 148.51	Carbon Cycling	Carbon degradation	Cellulose	superkingdom:Eukaryota;kingdom:Fungi;phylum:Ascomycota;class:Sordariomycetes;order:Sordariales;family:Chaetomiaceae;genus:Chaetomium;species:Chaetomium globosum;	1.05106	0.895727	1.00065	0.930694	1.05645	1.01037	1.01237	0.931026	1.0718
85078070	cellobiase	Neurospora crassa OR74A	Carbon Cycling	Carbon degradation	Cellulose	superkingdom:Eukaryota;kingdom:Fungi;phylum:Ascomycota;class:Sordariomycetes;order:Sordariales;family:Sordariaceae;genus:Neurospora;species:Neurospora crassa;	0.949892	0.903736	0.95202	0.930439	0.973942	0.975432	0.978678	0.832482	0.933078
85078541	cellobiase	Neurospora crassa OR74A	Carbon Cycling	Carbon degradation	Cellulose	superkingdom:Eukaryota;kingdom:Fungi;phylum:Ascomycota;class:Sordariomycetes;order:Sordariales;family:Sordariaceae;genus:Neurospora;species:Neurospora crassa;	0.968329	0.914712	0.929059	0.978885	0.9845	0.993075	0.976418	0.890275	0.965945
238596433	cellobiase	Moniliophthora perniciosa FA553	Carbon Cycling	Carbon degradation	Cellulose	superkingdom:Eukaryota;kingdom:Fungi;phylum:Basidiomycota;class:Agaricomycetes;order:Agaricales;family:Marasmiaceae;genus:Moniliophthora;species:Moniliophthora perniciosa;	0.986977	0.983183	0.959069	0.92884	0.965434	0.969345	0.958663	1.00112	0.9712
238616169	cellobiase	Moniliophthora perniciosa FA553	Carbon Cycling	Carbon degradation	Cellulose	superkingdom:Eukaryota;kingdom:Fungi;phylum:Basidiomycota;class:Agaricomycetes;order:Agaricales;family:Marasmiaceae;genus:Moniliophthora;species:Moniliophthora perniciosa;	NA	NA	NA	NA	NA	NA	0.76562	NA	0.790457
215462457	cellobiase	Moniliophthora perniciosa FA553	Carbon Cycling	Carbon degradation	Cellulose	superkingdom:Eukaryota;kingdom:Fungi;phylum:Basidiomycota;class:Agaricomycetes;order:Agaricales;family:Marasmiaceae;genus:Moniliophthora;species:Moniliophthora perniciosa;	0.824366	NA	0.809301	0.788518	0.749527	0.882946	NA	NA	NA
238602074	cellobiase	Moniliophthora perniciosa FA553	Carbon Cycling	Carbon degradation	Cellulose	superkingdom:Eukaryota;kingdom:Fungi;phylum:Basidiomycota;class:Agaricomycetes;order:Agaricales;family:Marasmiaceae;genus:Moniliophthora;species:Moniliophthora perniciosa;	0.845924	NA	0.887114	0.790735	0.865821	0.836872	0.811792	0.807618	0.860892
299754143a	cellobiase	Coprinopsis cinerea okayama7_130	Carbon Cycling	Carbon degradation	Cellulose	superkingdom:Eukaryota;kingdom:Fungi;phylum:Basidiomycota;class:Agaricomycetes;order:Agaricales;family:Psathyrellaceae;genus:Coprinopsis;species:Coprinopsis cinerea;	0.882748	0.856222	0.914528	0.838484	0.930321	0.886863	0.889886	NA	0.917185
299755823	cellobiase	Coprinopsis cinerea okayama7_130	Carbon Cycling	Carbon degradation	Cellulose	superkingdom:Eukaryota;kingdom:Fungi;phylum:Basidiomycota;class:Agaricomycetes;order:Agaricales;family:Psathyrellaceae;genus:Coprinopsis;species:Coprinopsis cinerea;	1.08045	0.93894	1.00966	0.916597	1.03286	0.914322	0.943602	1.03375	0.94676
299754595b	cellobiase	Coprinopsis cinerea okayama7_130	Carbon Cycling	Carbon degradation	Cellulose	superkingdom:Eukaryota;kingdom:Fungi;phylum:Basidiomycota;class:Agaricomycetes;order:Agaricales;family:Psathyrellaceae;genus:Coprinopsis;species:Coprinopsis cinerea;	0.864816	NA	0.772984	0.712353	0.746278	0.838429	0.87198	NA	0.885332
299754143b	cellobiase	Coprinopsis cinerea okayama7_130	Carbon Cycling	Carbon degradation	Cellulose	superkingdom:Eukaryota;kingdom:Fungi;phylum:Basidiomycota;class:Agaricomycetes;order:Agaricales;family:Psathyrellaceae;genus:Coprinopsis;species:Coprinopsis cinerea;	0.867092	0.918667	0.864424	0.954773	0.867102	0.902973	0.86575	0.936097	0.904459
299753841	cellobiase	Coprinopsis cinerea okayama7_130	Carbon Cycling	Carbon degradation	Cellulose	superkingdom:Eukaryota;kingdom:Fungi;phylum:Basidiomycota;class:Agaricomycetes;order:Agaricales;family:Psathyrellaceae;genus:Coprinopsis;species:Coprinopsis cinerea;	0.836743	0.886706	0.866116	0.987308	0.858541	0.919904	0.834995	0.950872	0.901798
299739936	cellobiase	Coprinopsis cinerea okayama7_130	Carbon Cycling	Carbon degradation	Cellulose	superkingdom:Eukaryota;kingdom:Fungi;phylum:Basidiomycota;class:Agaricomycetes;order:Agaricales;family:Psathyrellaceae;genus:Coprinopsis;species:Coprinopsis cinerea;	NA	NA	NA	NA	NA	NA	0.78595	NA	0.743649
169850	cellobiase	Schizophyllum commune	Carbon Cycling	Carbon degradation	Cellulose	superkingdom:Eukaryota;kingdom:Fungi;phylum:Basidiomycota;class:Agaricomycetes;order:Agaricales;family:Schizophyllaceae;genus:Schizophyllum;	0.864945	0.878632	0.850685	0.944987	0.849884	0.879113	0.868238	0.944229	0.907571
119366853	cellobiase	Rhizoctonia solani	Carbon Cycling	Carbon degradation	Cellulose	superkingdom:Eukaryota;kingdom:Fungi;phylum:Basidiomycota;class:Agaricomycetes;order:Cantharellales;family:Ceratobasidiaceae;genus:Thanatephorus;species:Thanatephorus cucumeris;	0.845288	0.809341	0.844646	0.778569	0.867787	0.814174	0.819389	NA	0.870819
3320413a	cellobiase	Phanerochaete chrysosporium	Carbon Cycling	Carbon degradation	Cellulose	superkingdom:Eukaryota;kingdom:Fungi;phylum:Basidiomycota;class:Agaricomycetes;order:Corticiales;family:Corticiaceae;genus:Phanerochaete;	0.958064	0.952992	0.957837	0.980164	0.901018	0.960662	0.910359	0.967894	0.960371
3320413b	cellobiase	Phanerochaete chrysosporium	Carbon Cycling	Carbon degradation	Cellulose	superkingdom:Eukaryota;kingdom:Fungi;phylum:Basidiomycota;class:Agaricomycetes;order:Corticiales;family:Corticiaceae;genus:Phanerochaete;	0.922804	0.90131	0.92414	0.928643	0.886769	0.983258	0.870189	0.916193	0.967503
3320413c	cellobiase	Phanerochaete chrysosporium	Carbon Cycling	Carbon degradation	Cellulose	superkingdom:Eukaryota;kingdom:Fungi;phylum:Basidiomycota;class:Agaricomycetes;order:Corticiales;family:Corticiaceae;genus:Phanerochaete;	0.901312	0.791064	0.892818	0.735532	0.858524	0.803286	0.893882	0.825923	0.828867
19352194	cellobiase	Phanerochaete chrysosporium	Carbon Cycling	Carbon degradation	Cellulose	superkingdom:Eukaryota;kingdom:Fungi;phylum:Basidiomycota;class:Agaricomycetes;order:Corticiales;family:Corticiaceae;genus:Phanerochaete;	0.905956	0.839912	0.969307	0.886867	0.962278	0.909375	0.89347	0.850983	0.869523
89941455	cellobiase	Phanerochaete chrysosporium	Carbon Cycling	Carbon degradation	Cellulose	superkingdom:Eukaryota;kingdom:Fungi;phylum:Basidiomycota;class:Agaricomycetes;order:Corticiales;family:Corticiaceae;genus:Phanerochaete;	0.827608	0.842017	0.934611	0.758186	0.906464	0.835937	0.887181	0.857723	0.78215
89941453	cellobiase	Phanerochaete chrysosporium	Carbon Cycling	Carbon degradation	Cellulose	superkingdom:Eukaryota;kingdom:Fungi;phylum:Basidiomycota;class:Agaricomycetes;order:Corticiales;family:Corticiaceae;genus:Phanerochaete;	1.06681	1.01036	1.07286	1.07596	1.03676	1.10662	1.02099	0.940287	1.03465
242215305	cellobiase	Postia placenta Mad-698-R	Carbon Cycling	Carbon degradation	Cellulose	superkingdom:Eukaryota;kingdom:Fungi;phylum:Basidiomycota;class:Agaricomycetes;order:Polyporales;family:Coriolaceae;genus:Postia;species:Postia placenta;	0.800012	0.858232	0.81894	0.791818	0.835144	0.892919	0.842483	0.856358	0.845962
242208680	cellobiase	Postia placenta Mad-698-R	Carbon Cycling	Carbon degradation	Cellulose	superkingdom:Eukaryota;kingdom:Fungi;phylum:Basidiomycota;class:Agaricomycetes;order:Polyporales;family:Coriolaceae;genus:Postia;species:Postia placenta;	0.960771	0.937116	0.988955	0.907845	0.979488	0.964998	0.986671	0.974831	0.909792
242217844	cellobiase	Postia placenta Mad-698-R	Carbon Cycling	Carbon degradation	Cellulose	superkingdom:Eukaryota;kingdom:Fungi;phylum:Basidiomycota;class:Agaricomycetes;order:Polyporales;family:Coriolaceae;genus:Postia;species:Postia placenta;	0.866484	0.807385	0.8275	0.712729	0.855013	0.78524	0.795617	NA	0.847104
209408527	cellobiase	uncultured organism	Carbon Cycling	Carbon degradation	Cellulose	NA	0.935475	0.982629	0.941788	0.902273	0.923146	0.941367	0.919316	0.928689	0.990713
319895727	cellobiase	mine drainage metagenome	Carbon Cycling	Carbon degradation	Cellulose	NA	1.16981	1.1492	1.17045	1.24088	1.21262	1.20172	1.18474	1.22031	1.1955
319913874	cellobiase	mine drainage metagenome	Carbon Cycling	Carbon degradation	Cellulose	NA	0.962747	0.957543	0.975879	1.04634	1.01332	1.00633	0.976281	0.955994	0.998684
319907286	cellobiase	mine drainage metagenome	Carbon Cycling	Carbon degradation	Cellulose	NA	1.19405	1.17319	1.26987	1.13119	1.3179	1.18446	1.1719	1.22009	1.23619
209408523a	cellobiase	uncultured organism	Carbon Cycling	Carbon degradation	Cellulose	NA	0.990943	0.97625	1.01167	1.07896	1.02688	1.03542	0.986402	1.03705	1.01888
78926954	endoglucanase	uncultured bacterium	Carbon Cycling	Carbon degradation	Cellulose	superkingdom:Bacteria;	1.22613	1.22752	1.2411	1.31561	1.25529	1.23661	1.23096	1.2849	1.27454
37222147	endoglucanase	uncultured bacterium	Carbon Cycling	Carbon degradation	Cellulose	superkingdom:Bacteria;	1.20706	1.12224	1.21045	1.11185	1.27991	1.1884	1.20562	1.13982	1.12411
225871773	endoglucanase	Acidobacterium capsulatum ATCC 51196	Carbon Cycling	Carbon degradation	Cellulose	superkingdom:Bacteria;phylum:Acidobacteria;class:Acidobacteriia;order:Acidobacteriales;family:Acidobacteriaceae;genus:Acidobacterium;species:Acidobacterium capsulatum;	1.18573	1.18781	1.17961	1.11735	1.16494	1.1206	1.17282	1.14842	1.13407
117649371	endoglucanase	Acidothermus cellulolyticus 11B	Carbon Cycling	Carbon degradation	Cellulose	superkingdom:Bacteria;phylum:Actinobacteria;class:Actinobacteria;order:Actinomycetales;family:Acidothermaceae;genus:Acidothermus;species:Acidothermus cellulolyticus;	1.10079	1.1097	1.1516	1.12808	1.07343	1.10761	1.11028	1.09327	1.09836
117648641	endoglucanase	Acidothermus cellulolyticus 11B	Carbon Cycling	Carbon degradation	Cellulose	superkingdom:Bacteria;phylum:Actinobacteria;class:Actinobacteria;order:Actinomycetales;family:Acidothermaceae;genus:Acidothermus;species:Acidothermus cellulolyticus;	1.22982	1.148	1.2238	1.08377	1.25866	1.12814	1.17701	1.16058	1.15731
2980982	endoglucanase	Actinomyces sp. 40	Carbon Cycling	Carbon degradation	Cellulose	superkingdom:Bacteria;phylum:Actinobacteria;class:Actinobacteria;order:Actinomycetales;family:Actinomycetaceae;genus:Actinomyces;	1.12738	1.12632	1.14286	1.20198	1.1824	1.19574	1.13211	1.1581	1.15369
256389689	endoglucanase	Catenulispora acidiphila DSM 44928	Carbon Cycling	Carbon degradation	Cellulose	superkingdom:Bacteria;phylum:Actinobacteria;class:Actinobacteria;order:Actinomycetales;family:Catenulisporaceae;genus:Catenulispora;species:Catenulispora acidiphila;	1.25667	1.14729	1.09987	1.17324	1.24256	1.26495	1.18665	0.999979	1.2235
256395679	endoglucanase	Catenulispora acidiphila DSM 44928	Carbon Cycling	Carbon degradation	Cellulose	superkingdom:Bacteria;phylum:Actinobacteria;class:Actinobacteria;order:Actinomycetales;family:Catenulisporaceae;genus:Catenulispora;species:Catenulispora acidiphila;	0.985069	0.886085	0.856255	NA	0.921757	0.973426	0.904861	0.777834	0.951212
144423	endoglucanase	Cellulomonas fimi	Carbon Cycling	Carbon degradation	Cellulose	superkingdom:Bacteria;phylum:Actinobacteria;class:Actinobacteria;order:Actinomycetales;family:Cellulomonadaceae;genus:Cellulomonas;	NA	NA	NA	0.733994	0.818296	0.750992	0.767541	NA	0.814206
198404322	endoglucanase	Cellulomonas flavigena	Carbon Cycling	Carbon degradation	Cellulose	superkingdom:Bacteria;phylum:Actinobacteria;class:Actinobacteria;order:Actinomycetales;family:Cellulomonadaceae;genus:Cellulomonas;	1.05794	1.04176	1.05746	1.04299	1.00585	1.06527	1.01653	1.04442	1.06639
156066928	endoglucanase	Cellulomonas flavigena	Carbon Cycling	Carbon degradation	Cellulose	superkingdom:Bacteria;phylum:Actinobacteria;class:Actinobacteria;order:Actinomycetales;family:Cellulomonadaceae;genus:Cellulomonas;	0.969803	0.941473	0.97501	0.953165	0.957279	0.994056	0.935302	0.951323	0.929661
296128007	endoglucanase	Cellulomonas flavigena DSM 20109	Carbon Cycling	Carbon degradation	Cellulose	superkingdom:Bacteria;phylum:Actinobacteria;class:Actinobacteria;order:Actinomycetales;family:Cellulomonadaceae;genus:Cellulomonas;species:Cellulomonas flavigena;	0.867691	0.872018	0.900237	0.964386	0.890932	0.904105	0.851866	0.988628	0.891586
291299452	endoglucanase	Stackebrandtia nassauensis DSM 44728	Carbon Cycling	Carbon degradation	Cellulose	superkingdom:Bacteria;phylum:Actinobacteria;class:Actinobacteria;order:Actinomycetales;family:Glycomycetaceae;genus:Stackebrandtia;species:Stackebrandtia nassauensis;	1.23545	1.25227	1.26755	1.35085	1.23695	1.29792	1.2509	1.27942	1.30156
148272660	endoglucanase	Clavibacter michiganensis subsp. michiganensis NCPPB 382	Carbon Cycling	Carbon degradation	Cellulose	superkingdom:Bacteria;phylum:Actinobacteria;class:Actinobacteria;order:Actinomycetales;family:Microbacteriaceae;genus:Clavibacter;species:Clavibacter michiganensis;	1.18938	1.08497	1.08141	1.04317	1.05731	1.17364	1.13258	0.878798	1.16356
148245203	endoglucanase	Clavibacter michiganensis subsp. michiganensis NCPPB 382	Carbon Cycling	Carbon degradation	Cellulose	superkingdom:Bacteria;phylum:Actinobacteria;class:Actinobacteria;order:Actinomycetales;family:Microbacteriaceae;genus:Clavibacter;species:Clavibacter michiganensis;	1.02408	0.906901	0.978459	0.903337	1.13853	1.04638	0.961209	0.96059	0.996648
13277513	endoglucanase	Clavibacter michiganensis subsp. sepedonicus	Carbon Cycling	Carbon degradation	Cellulose	superkingdom:Bacteria;phylum:Actinobacteria;class:Actinobacteria;order:Actinomycetales;family:Microbacteriaceae;genus:Clavibacter;species:Clavibacter michiganensis;	0.919017	0.914149	0.911142	0.991642	0.898375	0.937024	0.922211	0.96815	0.938168
323356589	endoglucanase	Microbacterium testaceum StLB037	Carbon Cycling	Carbon degradation	Cellulose	superkingdom:Bacteria;phylum:Actinobacteria;class:Actinobacteria;order:Actinomycetales;family:Microbacteriaceae;genus:Microbacterium;species:Microbacterium testaceum;	1.04889	1.10273	1.0992	1.01756	1.04396	1.09161	1.06323	1.06005	1.01108
359837192	endoglucanase	Actinoplanes sp. SE50/110	Carbon Cycling	Carbon degradation	Cellulose	superkingdom:Bacteria;phylum:Actinobacteria;class:Actinobacteria;order:Actinomycetales;family:Micromonosporaceae;genus:Actinoplanes;	1.07553	1.00486	1.07805	0.982529	1.02434	0.933004	1.07355	0.94907	0.955694
359836553	endoglucanase	Actinoplanes sp. SE50/110	Carbon Cycling	Carbon degradation	Cellulose	superkingdom:Bacteria;phylum:Actinobacteria;class:Actinobacteria;order:Actinomycetales;family:Micromonosporaceae;genus:Actinoplanes;	0.779721	0.793745	0.825331	0.809844	0.8481	0.805167	0.827258	NA	0.846054
359837375	endoglucanase	Actinoplanes sp. SE50/110	Carbon Cycling	Carbon degradation	Cellulose	superkingdom:Bacteria;phylum:Actinobacteria;class:Actinobacteria;order:Actinomycetales;family:Micromonosporaceae;genus:Actinoplanes;	1.10469	1.05011	1.10834	0.988916	1.11165	1.12651	1.05989	1.05734	1.18207
359836554	endoglucanase	Actinoplanes sp. SE50/110	Carbon Cycling	Carbon degradation	Cellulose	superkingdom:Bacteria;phylum:Actinobacteria;class:Actinobacteria;order:Actinomycetales;family:Micromonosporaceae;genus:Actinoplanes;	1.20936	1.17057	1.22453	1.15918	1.14901	1.19694	1.1525	1.20522	1.19777
237880780	endoglucanase	Actinoplanes garbadinensis	Carbon Cycling	Carbon degradation	Cellulose	superkingdom:Bacteria;phylum:Actinobacteria;class:Actinobacteria;order:Actinomycetales;family:Micromonosporaceae;genus:Actinoplanes;	1.00056	0.978088	0.990885	1.00312	1.05922	1.0241	0.993969	0.883141	1.01519
238059513	endoglucanase	Micromonospora sp. ATCC 39149	Carbon Cycling	Carbon degradation	Cellulose	superkingdom:Bacteria;phylum:Actinobacteria;class:Actinobacteria;order:Actinomycetales;family:Micromonosporaceae;genus:Micromonospora;	1.26202	1.27618	1.27735	1.3471	1.26317	1.30653	1.24629	1.23256	1.2913
302867449	endoglucanase	Micromonospora aurantiaca ATCC 27029	Carbon Cycling	Carbon degradation	Cellulose	superkingdom:Bacteria;phylum:Actinobacteria;class:Actinobacteria;order:Actinomycetales;family:Micromonosporaceae;genus:Micromonospora;species:Micromonospora aurantiaca;	1.06479	0.951113	1.0706	0.903159	1.119	0.933627	1.03965	0.983753	1.00515
328809536	endoglucanase	Verrucosispora maris AB-18-032	Carbon Cycling	Carbon degradation	Cellulose	superkingdom:Bacteria;phylum:Actinobacteria;class:Actinobacteria;order:Actinomycetales;family:Micromonosporaceae;genus:Verrucosispora;species:Verrucosispora maris;	1.24085	1.21615	1.15799	1.22116	1.24446	1.25083	1.23853	1.06374	1.2762
330466608	endoglucanase	Verrucosispora maris AB-18-032	Carbon Cycling	Carbon degradation	Cellulose	superkingdom:Bacteria;phylum:Actinobacteria;class:Actinobacteria;order:Actinomycetales;family:Micromonosporaceae;genus:Verrucosispora;species:Verrucosispora maris;	1.25225	1.24514	1.25065	1.31603	1.26015	1.30417	1.20551	1.22636	1.2614
328808954	endoglucanase	Verrucosispora maris AB-18-032	Carbon Cycling	Carbon degradation	Cellulose	superkingdom:Bacteria;phylum:Actinobacteria;class:Actinobacteria;order:Actinomycetales;family:Micromonosporaceae;genus:Verrucosispora;species:Verrucosispora maris;	0.975078	0.97623	0.991299	1.05247	1.02838	1.01713	0.996815	1.0251	0.999101
328809664	endoglucanase	Verrucosispora maris AB-18-032	Carbon Cycling	Carbon degradation	Cellulose	superkingdom:Bacteria;phylum:Actinobacteria;class:Actinobacteria;order:Actinomycetales;family:Micromonosporaceae;genus:Verrucosispora;species:Verrucosispora maris;	1.12057	1.06134	1.09413	1.0225	1.17566	1.05812	1.07113	0.936395	1.12029
330468452	endoglucanase	Verrucosispora maris AB-18-032	Carbon Cycling	Carbon degradation	Cellulose	superkingdom:Bacteria;phylum:Actinobacteria;class:Actinobacteria;order:Actinomycetales;family:Micromonosporaceae;genus:Verrucosispora;species:Verrucosispora maris;	1.04084	0.886284	0.914244	0.854325	0.988277	0.992049	1.07575	0.881804	0.963674
120404477	endoglucanase	Mycobacterium vanbaalenii PYR-1	Carbon Cycling	Carbon degradation	Cellulose	superkingdom:Bacteria;phylum:Actinobacteria;class:Actinobacteria;order:Actinomycetales;family:Mycobacteriaceae;genus:Mycobacterium;species:Mycobacterium vanbaalenii;	1.11604	1.03773	1.1452	1.04553	1.1549	1.07112	1.07419	1.08617	1.04267
297563119	endoglucanase	Nocardiopsis dassonvillei subsp. dassonvillei DSM 43111	Carbon Cycling	Carbon degradation	Cellulose	superkingdom:Bacteria;phylum:Actinobacteria;class:Actinobacteria;order:Actinomycetales;family:Nocardiopsaceae;genus:Nocardiopsis;species:Nocardiopsis dassonvillei;	1.08293	1.15002	1.166	1.22681	1.10756	1.09167	1.12414	1.1942	1.17601
71915210	endoglucanase	Thermobifida fusca YX	Carbon Cycling	Carbon degradation	Cellulose	superkingdom:Bacteria;phylum:Actinobacteria;class:Actinobacteria;order:Actinomycetales;family:Nocardiopsaceae;genus:Thermobifida;species:Thermobifida fusca;	0.91135	0.940037	0.951757	0.899687	0.896907	0.89233	0.914282	0.936155	0.932263
300785821	endoglucanase	Amycolatopsis mediterranei U32	Carbon Cycling	Carbon degradation	Cellulose	superkingdom:Bacteria;phylum:Actinobacteria;class:Actinobacteria;order:Actinomycetales;family:Pseudonocardiaceae;genus:Amycolatopsis;species:Amycolatopsis mediterranei;	1.01019	0.986202	1.00485	1.08279	1.01849	1.03609	1.00514	1.08389	1.04127
300789644	endoglucanase	Amycolatopsis mediterranei U32	Carbon Cycling	Carbon degradation	Cellulose	superkingdom:Bacteria;phylum:Actinobacteria;class:Actinobacteria;order:Actinomycetales;family:Pseudonocardiaceae;genus:Amycolatopsis;species:Amycolatopsis mediterranei;	0.874908	0.765525	0.766221	NA	0.86293	0.865836	0.800405	NA	0.793275
340531624	endoglucanase	Amycolatopsis mediterranei S699	Carbon Cycling	Carbon degradation	Cellulose	superkingdom:Bacteria;phylum:Actinobacteria;class:Actinobacteria;order:Actinomycetales;family:Pseudonocardiaceae;genus:Amycolatopsis;species:Amycolatopsis mediterranei;	1.14644	1.1322	1.21229	1.17261	1.23753	1.14195	1.15598	1.12613	1.15648
340528562	endoglucanase	Amycolatopsis mediterranei S699	Carbon Cycling	Carbon degradation	Cellulose	superkingdom:Bacteria;phylum:Actinobacteria;class:Actinobacteria;order:Actinomycetales;family:Pseudonocardiaceae;genus:Amycolatopsis;species:Amycolatopsis mediterranei;	0.970901	0.916761	0.932966	0.857066	1.00904	0.835368	0.926283	0.916659	0.908043
299799165	endoglucanase	Amycolatopsis mediterranei U32	Carbon Cycling	Carbon degradation	Cellulose	superkingdom:Bacteria;phylum:Actinobacteria;class:Actinobacteria;order:Actinomycetales;family:Pseudonocardiaceae;genus:Amycolatopsis;species:Amycolatopsis mediterranei;	1.04182	1.01045	1.03323	1.05963	1.17759	1.17491	1.03506	0.912621	1.07991
296268343	endoglucanase	Thermobispora bispora DSM 43833	Carbon Cycling	Carbon degradation	Cellulose	superkingdom:Bacteria;phylum:Actinobacteria;class:Actinobacteria;order:Actinomycetales;family:Pseudonocardiaceae;genus:Thermobispora;species:Thermobispora bispora;	0.841269	0.832536	0.840687	0.791639	0.876761	0.847266	0.826686	NA	0.864588
296093577	endoglucanase	Thermobispora bispora DSM 43833	Carbon Cycling	Carbon degradation	Cellulose	superkingdom:Bacteria;phylum:Actinobacteria;class:Actinobacteria;order:Actinomycetales;family:Pseudonocardiaceae;genus:Thermobispora;species:Thermobispora bispora;	1.03801	1.0756	1.06581	1.21835	1.06515	1.09212	1.04218	1.15586	1.11363
357393893	endoglucanase	Kitasatospora setae KM-6054	Carbon Cycling	Carbon degradation	Cellulose	superkingdom:Bacteria;phylum:Actinobacteria;class:Actinobacteria;order:Actinomycetales;family:Streptomycetaceae;genus:Kitasatospora;species:Kitasatospora setae;	1.12266	1.06944	1.11333	1.07734	1.15774	1.09332	1.08885	1.04547	1.09149
357394292	endoglucanase	Kitasatospora setae KM-6054	Carbon Cycling	Carbon degradation	Cellulose	superkingdom:Bacteria;phylum:Actinobacteria;class:Actinobacteria;order:Actinomycetales;family:Streptomycetaceae;genus:Kitasatospora;species:Kitasatospora setae;	1.08038	1.05813	1.07918	1.12335	1.11146	1.08009	1.09469	1.03781	1.11708
311900250	endoglucanase	Kitasatospora setae KM-6054	Carbon Cycling	Carbon degradation	Cellulose	superkingdom:Bacteria;phylum:Actinobacteria;class:Actinobacteria;order:Actinomycetales;family:Streptomycetaceae;genus:Kitasatospora;species:Kitasatospora setae;	1.09563	1.11315	1.11802	1.11625	1.05528	1.15758	1.13337	1.07377	1.0817
294629964	endoglucanase	Streptomyces sp. e14	Carbon Cycling	Carbon degradation	Cellulose	superkingdom:Bacteria;phylum:Actinobacteria;class:Actinobacteria;order:Actinomycetales;family:Streptomycetaceae;genus:Streptomyces;	1.04596	0.930283	0.951778	0.955109	0.991717	1.05272	1.01261	NA	0.997982
344998109	endoglucanase	Streptomyces sp. SirexAA-E	Carbon Cycling	Carbon degradation	Cellulose	superkingdom:Bacteria;phylum:Actinobacteria;class:Actinobacteria;order:Actinomycetales;family:Streptomycetaceae;genus:Streptomyces;	0.989868	0.992203	1.05376	0.871865	1.03602	0.984421	1.003	1.04227	0.982877
333027061	endoglucanase	Streptomyces sp. Tu6071	Carbon Cycling	Carbon degradation	Cellulose	superkingdom:Bacteria;phylum:Actinobacteria;class:Actinobacteria;order:Actinomycetales;family:Streptomycetaceae;genus:Streptomyces;	0.986436	0.969693	0.989923	0.875889	1.01906	1.00757	0.93206	0.888012	0.904072
297159297	endoglucanase	Streptomyces bingchenggensis BCW-1	Carbon Cycling	Carbon degradation	Cellulose	superkingdom:Bacteria;phylum:Actinobacteria;class:Actinobacteria;order:Actinomycetales;family:Streptomycetaceae;genus:Streptomyces;species:Streptomyces bingchenggensis;	0.91611	0.934151	0.893607	1.03805	0.978706	1.00853	0.884498	0.986215	0.947387
297162605	endoglucanase	Streptomyces bingchenggensis BCW-1	Carbon Cycling	Carbon degradation	Cellulose	superkingdom:Bacteria;phylum:Actinobacteria;class:Actinobacteria;order:Actinomycetales;family:Streptomycetaceae;genus:Streptomyces;species:Streptomyces bingchenggensis;	1.07546	1.08606	1.08916	1.18743	1.09829	1.08728	1.07689	1.15809	1.11576
374991904	endoglucanase	Streptomyces bingchenggensis BCW-1	Carbon Cycling	Carbon degradation	Cellulose	superkingdom:Bacteria;phylum:Actinobacteria;class:Actinobacteria;order:Actinomycetales;family:Streptomycetaceae;genus:Streptomyces;species:Streptomyces bingchenggensis;	1.16249	1.12981	1.18062	1.14505	1.13102	1.21934	1.12378	1.15851	1.14533
294816405	endoglucanase	Streptomyces clavuligerus ATCC 27064	Carbon Cycling	Carbon degradation	Cellulose	superkingdom:Bacteria;phylum:Actinobacteria;class:Actinobacteria;order:Actinomycetales;family:Streptomycetaceae;genus:Streptomyces;species:Streptomyces clavuligerus;	1.26934	1.23447	1.25942	1.30243	1.19635	1.26205	1.26905	1.1159	1.27069
326446511	endoglucanase	Streptomyces clavuligerus ATCC 27064	Carbon Cycling	Carbon degradation	Cellulose	superkingdom:Bacteria;phylum:Actinobacteria;class:Actinobacteria;order:Actinomycetales;family:Streptomycetaceae;genus:Streptomyces;species:Streptomyces clavuligerus;	1.08476	1.09604	1.16372	1.0469	1.15153	1.09246	1.0462	1.08898	1.03814
3560021a	endoglucanase	Streptomyces coelicolor A3(2)	Carbon Cycling	Carbon degradation	Cellulose	superkingdom:Bacteria;phylum:Actinobacteria;class:Actinobacteria;order:Actinomycetales;family:Streptomycetaceae;genus:Streptomyces;species:Streptomyces coelicolor;	1.10952	1.09592	1.10573	1.15561	1.06231	1.12756	1.13079	1.13154	1.13475
21219070	endoglucanase	Streptomyces coelicolor A3(2)	Carbon Cycling	Carbon degradation	Cellulose	superkingdom:Bacteria;phylum:Actinobacteria;class:Actinobacteria;order:Actinomycetales;family:Streptomycetaceae;genus:Streptomyces;species:Streptomyces coelicolor;	1.17614	1.16297	1.19369	1.20579	1.21725	1.16773	1.1996	1.03109	1.23002
21224847	endoglucanase	Streptomyces coelicolor A3(2)	Carbon Cycling	Carbon degradation	Cellulose	superkingdom:Bacteria;phylum:Actinobacteria;class:Actinobacteria;order:Actinomycetales;family:Streptomycetaceae;genus:Streptomyces;species:Streptomyces coelicolor;	1.0359	1.08229	1.0563	1.17911	1.05931	1.07868	1.03937	1.13404	1.08341
239990802	endoglucanase	Streptomyces roseosporus NRRL 11379	Carbon Cycling	Carbon degradation	Cellulose	superkingdom:Bacteria;phylum:Actinobacteria;class:Actinobacteria;order:Actinomycetales;family:Streptomycetaceae;genus:Streptomyces;species:Streptomyces filamentosus;	0.934294	0.825662	0.850996	NA	0.968889	0.956398	0.89205	0.823074	0.938378
239991741	endoglucanase	Streptomyces roseosporus NRRL 11379	Carbon Cycling	Carbon degradation	Cellulose	superkingdom:Bacteria;phylum:Actinobacteria;class:Actinobacteria;order:Actinomycetales;family:Streptomycetaceae;genus:Streptomyces;species:Streptomyces filamentosus;	1.43214	1.42194	1.4562	1.49873	1.46437	1.43226	1.45455	1.47668	1.46324
357410990	endoglucanase	Streptomyces flavogriseus ATCC 33331	Carbon Cycling	Carbon degradation	Cellulose	superkingdom:Bacteria;phylum:Actinobacteria;class:Actinobacteria;order:Actinomycetales;family:Streptomycetaceae;genus:Streptomyces;species:Streptomyces flavogriseus;	1.10745	1.1022	1.14094	1.20853	1.08844	1.1233	1.12584	1.15335	1.1536
291435683	endoglucanase	Streptomyces ghanaensis ATCC 14672	Carbon Cycling	Carbon degradation	Cellulose	superkingdom:Bacteria;phylum:Actinobacteria;class:Actinobacteria;order:Actinomycetales;family:Streptomycetaceae;genus:Streptomyces;species:Streptomyces ghanaensis;	0.971364	0.896473	0.976638	1.03984	0.997819	1.06674	0.989449	0.927398	1.10198
260652439	endoglucanase	Streptomyces scabiei 87.22	Carbon Cycling	Carbon degradation	Cellulose	superkingdom:Bacteria;phylum:Actinobacteria;class:Actinobacteria;order:Actinomycetales;family:Streptomycetaceae;genus:Streptomyces;species:Streptomyces scabiei;	1.15508	1.17055	1.16267	1.20585	1.07144	1.14105	1.1388	1.13684	1.14802
297203588	endoglucanase	Streptomyces sviceus ATCC 29083	Carbon Cycling	Carbon degradation	Cellulose	superkingdom:Bacteria;phylum:Actinobacteria;class:Actinobacteria;order:Actinomycetales;family:Streptomycetaceae;genus:Streptomyces;species:Streptomyces sviceus;	1.20377	1.14138	1.04393	1.15412	1.13334	1.24652	1.18005	0.920976	1.20287
345016157	endoglucanase	Streptomyces violaceusniger Tu 4113	Carbon Cycling	Carbon degradation	Cellulose	superkingdom:Bacteria;phylum:Actinobacteria;class:Actinobacteria;order:Actinomycetales;family:Streptomycetaceae;genus:Streptomyces;species:Streptomyces violaceusniger;	0.877436	0.910444	0.898192	0.952483	0.798983	0.895704	0.899156	0.876479	0.897327
345633979	endoglucanase	Streptomyces zinciresistens K42	Carbon Cycling	Carbon degradation	Cellulose	superkingdom:Bacteria;phylum:Actinobacteria;class:Actinobacteria;order:Actinomycetales;family:Streptomycetaceae;genus:Streptomyces;species:Streptomyces zinciresistens;	1.03613	1.03685	1.0455	1.11479	1.0864	1.07841	1.04869	1.08926	1.05626
284041630	endoglucanase	Conexibacter woesei DSM 14684	Carbon Cycling	Carbon degradation	Cellulose	superkingdom:Bacteria;phylum:Actinobacteria;class:Actinobacteria;order:Solirubrobacterales;family:Conexibacteraceae;genus:Conexibacter;species:Conexibacter woesei;	0.863286	0.899443	0.903993	0.953203	0.798866	0.888365	0.851018	0.803544	0.870416
262356778	endoglucanase	Bacteroides sp. 2_1_22	Carbon Cycling	Carbon degradation	Cellulose	superkingdom:Bacteria;phylum:Bacteroidetes;class:Bacteroidia;order:Bacteroidales;family:Bacteroidaceae;genus:Bacteroides;	0.801435	0.825232	0.801605	0.811356	0.832496	0.849905	0.794581	NA	0.772345
160884637	endoglucanase	Bacteroides ovatus ATCC 8483	Carbon Cycling	Carbon degradation	Cellulose	superkingdom:Bacteria;phylum:Bacteroidetes;class:Bacteroidia;order:Bacteroidales;family:Bacteroidaceae;genus:Bacteroides;species:Bacteroides ovatus;	0.885034	NA	0.853584	NA	0.877902	0.801032	0.818446	0.825366	0.813045
295085670	endoglucanase	Bacteroides xylanisolvens XB1A	Carbon Cycling	Carbon degradation	Cellulose	superkingdom:Bacteria;phylum:Bacteroidetes;class:Bacteroidia;order:Bacteroidales;family:Bacteroidaceae;genus:Bacteroides;species:Bacteroides xylanisolvens;	0.795876	NA	0.795659	0.732608	0.938839	0.795215	NA	NA	NA
110280197	endoglucanase	Cytophaga hutchinsonii ATCC 33406	Carbon Cycling	Carbon degradation	Cellulose	superkingdom:Bacteria;phylum:Bacteroidetes;class:Cytophagia;order:Cytophagales;family:Cytophagaceae;genus:Cytophaga;species:Cytophaga hutchinsonii;	NA	NA	NA	NA	NA	NA	0.765451	NA	0.776127
110281180	endoglucanase	Cytophaga hutchinsonii ATCC 33406	Carbon Cycling	Carbon degradation	Cellulose	superkingdom:Bacteria;phylum:Bacteroidetes;class:Cytophagia;order:Cytophagales;family:Cytophagaceae;genus:Cytophaga;species:Cytophaga hutchinsonii;	0.95033	0.90632	0.936311	0.961512	0.887463	0.959737	0.912521	0.799263	0.963922
284036558	endoglucanase	Spirosoma linguale DSM 74	Carbon Cycling	Carbon degradation	Cellulose	superkingdom:Bacteria;phylum:Bacteroidetes;class:Cytophagia;order:Cytophagales;family:Cytophagaceae;genus:Spirosoma;species:Spirosoma linguale;	NA	0.767231	0.746904	NA	NA	NA	0.761231	0.806766	0.753408
159889868	endoglucanase	Herpetosiphon aurantiacus DSM 785	Carbon Cycling	Carbon degradation	Cellulose	superkingdom:Bacteria;phylum:Chloroflexi;class:Chloroflexi;order:Herpetosiphonales;family:Herpetosiphonaceae;genus:Herpetosiphon;species:Herpetosiphon aurantiacus;	1.05876	1.05234	1.02421	1.00865	1.03452	1.02679	1.02294	1.05133	1.03854
298251924	endoglucanase	Ktedonobacter racemifer DSM 44963	Carbon Cycling	Carbon degradation	Cellulose	superkingdom:Bacteria;phylum:Chloroflexi;class:Ktedonobacteria;order:Ktedonobacterales;family:Ktedonobacteraceae;genus:Ktedonobacter;species:Ktedonobacter racemifer;	1.37604	1.36579	1.38654	1.39907	1.25336	1.34957	1.35913	1.1152	1.42901
113953433	endoglucanase	Synechococcus sp. CC9311	Carbon Cycling	Carbon degradation	Cellulose	superkingdom:Bacteria;phylum:Cyanobacteria;order:Chroococcales;genus:Synechococcus;	1.04431	0.971588	1.01515	0.964703	1.06997	1.06162	0.981957	0.944568	0.977674
17135268	endoglucanase	Nostoc sp. PCC 7120	Carbon Cycling	Carbon degradation	Cellulose	superkingdom:Bacteria;phylum:Cyanobacteria;order:Nostocales;family:Nostocaceae;genus:Nostoc;	0.935323	0.884169	0.85142	0.80827	0.838881	0.887973	0.835625	NA	0.847884
196176253	endoglucanase	Microcoleus chthonoplastes PCC 7420	Carbon Cycling	Carbon degradation	Cellulose	superkingdom:Bacteria;phylum:Cyanobacteria;order:Oscillatoriales;genus:Coleofasciculus;species:Coleofasciculus chthonoplastes;	0.988501	0.960156	1.06985	0.956069	1.11629	0.991818	1.01977	0.990087	1.06257
334117218	endoglucanase	Microcoleus vaginatus FGP-2	Carbon Cycling	Carbon degradation	Cellulose	superkingdom:Bacteria;phylum:Cyanobacteria;order:Oscillatoriales;genus:Microcoleus;species:Microcoleus vaginatus;	0.974954	0.852066	0.895813	0.765687	0.93292	0.908592	0.873683	0.895884	0.984569
297623672	endoglucanase	Truepera radiovictrix DSM 17093	Carbon Cycling	Carbon degradation	Cellulose	superkingdom:Bacteria;phylum:Deinococcus-Thermus;class:Deinococci;order:Deinococcales;family:Trueperaceae;genus:Truepera;species:Truepera radiovictrix;	1.19136	1.18684	1.20826	1.2804	1.23406	1.20175	1.22422	1.2703	1.22552
296152036	endoglucanase	Bacillus subtilis subsp. spizizenii ATCC 6633	Carbon Cycling	Carbon degradation	Cellulose	superkingdom:Bacteria;phylum:Firmicutes;class:Bacilli;order:Bacillales;family:Bacillaceae;genus:Bacillus;species:Bacillus subtilis;	NA	0.810698	0.77979	0.887538	0.728965	0.796656	NA	NA	NA
375309789	endoglucanase	Paenibacillus sp. Aloe-11	Carbon Cycling	Carbon degradation	Cellulose	superkingdom:Bacteria;phylum:Firmicutes;class:Bacilli;order:Bacillales;family:Paenibacillaceae;genus:Paenibacillus;	1.00542	1.08205	1.05628	1.18948	1.01467	1.0524	1.03108	1.11884	1.07851
374343072	endoglucanase	Paenibacillus sp. WRL301	Carbon Cycling	Carbon degradation	Cellulose	superkingdom:Bacteria;phylum:Firmicutes;class:Bacilli;order:Bacillales;family:Paenibacillaceae;genus:Paenibacillus;	0.865485	0.816998	0.816715	0.750473	NA	0.828544	0.814001	NA	0.842883
378570522	endoglucanase	Paenibacillus mucilaginosus 3016	Carbon Cycling	Carbon degradation	Cellulose	superkingdom:Bacteria;phylum:Firmicutes;class:Bacilli;order:Bacillales;family:Paenibacillaceae;genus:Paenibacillus;species:Paenibacillus mucilaginosus;	0.866833	0.858784	0.91088	0.800612	0.97924	0.852994	0.855454	0.862276	0.878112
336300064	endoglucanase	Paenibacillus mucilaginosus KNP414	Carbon Cycling	Carbon degradation	Cellulose	superkingdom:Bacteria;phylum:Firmicutes;class:Bacilli;order:Bacillales;family:Paenibacillaceae;genus:Paenibacillus;species:Paenibacillus mucilaginosus;	1.08359	1.05067	1.03283	1.06464	1.02904	1.07923	1.0364	1.05435	1.04017
336301569	endoglucanase	Paenibacillus mucilaginosus KNP414	Carbon Cycling	Carbon degradation	Cellulose	superkingdom:Bacteria;phylum:Firmicutes;class:Bacilli;order:Bacillales;family:Paenibacillaceae;genus:Paenibacillus;species:Paenibacillus mucilaginosus;	1.06946	1.03823	1.05396	1.06301	1.1162	1.07877	1.06591	0.945489	1.07113
343097289b	endoglucanase	Paenibacillus polymyxa M1	Carbon Cycling	Carbon degradation	Cellulose	superkingdom:Bacteria;phylum:Firmicutes;class:Bacilli;order:Bacillales;family:Paenibacillaceae;genus:Paenibacillus;species:Paenibacillus polymyxa;	NA	NA	NA	NA	0.755008	0.753801	0.775009	NA	0.840177
310643441	endoglucanase	Paenibacillus polymyxa SC2	Carbon Cycling	Carbon degradation	Cellulose	superkingdom:Bacteria;phylum:Firmicutes;class:Bacilli;order:Bacillales;family:Paenibacillaceae;genus:Paenibacillus;species:Paenibacillus polymyxa;	0.98682	0.962866	0.979535	0.930142	0.899564	0.949196	0.951598	0.9107	0.951441
357202941	endoglucanase	Paenibacillus terrae HPL-003	Carbon Cycling	Carbon degradation	Cellulose	superkingdom:Bacteria;phylum:Firmicutes;class:Bacilli;order:Bacillales;family:Paenibacillaceae;genus:Paenibacillus;species:Paenibacillus terrae;	1.02016	0.920238	0.949868	0.865678	1.06835	0.971765	1.02161	0.926684	0.883552
357204276	endoglucanase	Paenibacillus terrae HPL-003	Carbon Cycling	Carbon degradation	Cellulose	superkingdom:Bacteria;phylum:Firmicutes;class:Bacilli;order:Bacillales;family:Paenibacillaceae;genus:Paenibacillus;species:Paenibacillus terrae;	0.856504	0.872768	0.871021	0.816782	0.847402	0.786839	0.83744	0.911624	0.829488
376261237	endoglucanase	Clostridium sp. BNL1100	Carbon Cycling	Carbon degradation	Cellulose	superkingdom:Bacteria;phylum:Firmicutes;class:Clostridia;order:Clostridiales;family:Clostridiaceae;genus:Clostridium;	1.26513	1.25998	1.27007	1.3689	1.30968	1.34861	1.27305	1.3045	1.28401
40669	endoglucanase	Clostridium thermocellum	Carbon Cycling	Carbon degradation	Cellulose	superkingdom:Bacteria;phylum:Firmicutes;class:Clostridia;order:Clostridiales;family:Clostridiaceae;genus:Clostridium;	0.753913	0.776438	0.771552	NA	0.749367	0.796771	NA	0.821533	0.777868
270288706	endoglucanase	Clostridium josui	Carbon Cycling	Carbon degradation	Cellulose	superkingdom:Bacteria;phylum:Firmicutes;class:Clostridia;order:Clostridiales;family:Clostridiaceae;genus:Clostridium;	0.880559	NA	0.868765	0.718702	0.863939	0.755524	0.808354	NA	0.749308
1663519	endoglucanase	Clostridium thermocellum	Carbon Cycling	Carbon degradation	Cellulose	superkingdom:Bacteria;phylum:Firmicutes;class:Clostridia;order:Clostridiales;family:Clostridiaceae;genus:Clostridium;	0.812618	0.833804	0.793661	NA	0.814972	0.78575	NA	NA	NA
5705874a	endoglucanase	Clostridium cellulovorans	Carbon Cycling	Carbon degradation	Cellulose	superkingdom:Bacteria;phylum:Firmicutes;class:Clostridia;order:Clostridiales;family:Clostridiaceae;genus:Clostridium;	NA	NA	NA	NA	NA	NA	0.764737	NA	0.772177
359826800	endoglucanase	Clostridium clariflavum DSM 19732	Carbon Cycling	Carbon degradation	Cellulose	superkingdom:Bacteria;phylum:Firmicutes;class:Clostridia;order:Clostridiales;family:Clostridiaceae;genus:Clostridium;species:Clostridium clariflavum;	1.03853	1.00678	1.02216	1.01533	1.05405	1.04135	1.04312	0.824431	1.06845
374296316	endoglucanase	Clostridium clariflavum DSM 19732	Carbon Cycling	Carbon degradation	Cellulose	superkingdom:Bacteria;phylum:Firmicutes;class:Clostridia;order:Clostridiales;family:Clostridiaceae;genus:Clostridium;species:Clostridium clariflavum;	0.840136	0.809232	0.780846	0.818829	0.816039	0.836142	0.833098	NA	0.877747
374297272	endoglucanase	Clostridium clariflavum DSM 19732	Carbon Cycling	Carbon degradation	Cellulose	superkingdom:Bacteria;phylum:Firmicutes;class:Clostridia;order:Clostridiales;family:Clostridiaceae;genus:Clostridium;species:Clostridium clariflavum;	NA	NA	NA	0.704672	0.815118	NA	NA	NA	NA
374296205	endoglucanase	Clostridium clariflavum DSM 19732	Carbon Cycling	Carbon degradation	Cellulose	superkingdom:Bacteria;phylum:Firmicutes;class:Clostridia;order:Clostridiales;family:Clostridiaceae;genus:Clostridium;species:Clostridium clariflavum;	0.997629	1.00083	0.996014	0.98408	0.962912	1.02395	0.96882	0.93928	0.977953
160934473	endoglucanase	Clostridium leptum DSM 753	Carbon Cycling	Carbon degradation	Cellulose	superkingdom:Bacteria;phylum:Firmicutes;class:Clostridia;order:Clostridiales;family:Clostridiaceae;genus:Clostridium;species:Clostridium leptum;	0.901884	0.895916	0.890458	0.843149	0.841635	0.901474	0.922666	NA	0.908103
325986673	endoglucanase	Clostridium papyrosolvens DSM 2782	Carbon Cycling	Carbon degradation	Cellulose	superkingdom:Bacteria;phylum:Firmicutes;class:Clostridia;order:Clostridiales;family:Clostridiaceae;genus:Clostridium;species:Clostridium papyrosolvens;	0.842847	0.821017	0.793633	0.767239	0.814615	0.8453	0.839699	0.898272	0.757083
160881491	endoglucanase	Clostridium phytofermentans ISDg	Carbon Cycling	Carbon degradation	Cellulose	superkingdom:Bacteria;phylum:Firmicutes;class:Clostridia;order:Clostridiales;family:Clostridiaceae;genus:Clostridium;species:Clostridium phytofermentans;	0.916384	0.916054	0.897851	0.913467	0.952088	1.04502	0.871763	0.959836	0.816242
125715467	endoglucanase	Clostridium thermocellum ATCC 27405	Carbon Cycling	Carbon degradation	Cellulose	superkingdom:Bacteria;phylum:Firmicutes;class:Clostridia;order:Clostridiales;family:Clostridiaceae;genus:Clostridium;species:Clostridium thermocellum;	0.860112	0.806287	0.844489	0.879115	0.860688	0.857603	0.817993	0.791429	0.87922
125712789	endoglucanase	Clostridium thermocellum ATCC 27405	Carbon Cycling	Carbon degradation	Cellulose	superkingdom:Bacteria;phylum:Firmicutes;class:Clostridia;order:Clostridiales;family:Clostridiaceae;genus:Clostridium;species:Clostridium thermocellum;	0.851134	0.800483	0.883795	0.716803	0.972638	0.832748	0.859074	0.762352	0.762611
379010747	endoglucanase	Acetobacterium woodii DSM 1030	Carbon Cycling	Carbon degradation	Cellulose	superkingdom:Bacteria;phylum:Firmicutes;class:Clostridia;order:Clostridiales;family:Eubacteriaceae;genus:Acetobacterium;species:Acetobacterium woodii;	0.844381	0.836243	0.856615	0.838392	0.808419	0.849511	0.849337	0.822088	0.839025
302395331	endoglucanase	Butyrivibrio proteoclasticus B316	Carbon Cycling	Carbon degradation	Cellulose	superkingdom:Bacteria;phylum:Firmicutes;class:Clostridia;order:Clostridiales;family:Lachnospiraceae;genus:Butyrivibrio;species:Butyrivibrio proteoclasticus;	1.08263	0.994776	1.10024	0.940419	0.977058	0.979148	1.10672	1.02732	0.979809
158450395	endoglucanase	Coprococcus eutactus ATCC 27759	Carbon Cycling	Carbon degradation	Cellulose	superkingdom:Bacteria;phylum:Firmicutes;class:Clostridia;order:Clostridiales;family:Lachnospiraceae;genus:Coprococcus;species:Coprococcus eutactus;	1.06908	1.09677	1.07645	1.20466	1.08127	1.1359	1.06362	1.12825	1.12191
158450454	endoglucanase	Coprococcus eutactus ATCC 27759	Carbon Cycling	Carbon degradation	Cellulose	superkingdom:Bacteria;phylum:Firmicutes;class:Clostridia;order:Clostridiales;family:Lachnospiraceae;genus:Coprococcus;species:Coprococcus eutactus;	NA	NA	NA	0.748942	0.807565	NA	NA	0.801606	0.77744
158450622	endoglucanase	Coprococcus eutactus ATCC 27759	Carbon Cycling	Carbon degradation	Cellulose	superkingdom:Bacteria;phylum:Firmicutes;class:Clostridia;order:Clostridiales;family:Lachnospiraceae;genus:Coprococcus;species:Coprococcus eutactus;	0.870771	0.929897	0.836748	0.789684	0.867686	0.929545	0.917663	NA	0.879641
6249561	endoglucanase	Acetivibrio cellulolyticus	Carbon Cycling	Carbon degradation	Cellulose	superkingdom:Bacteria;phylum:Firmicutes;class:Clostridia;order:Clostridiales;family:Ruminococcaceae;genus:Acetivibrio;	0.869214	0.78198	0.86376	0.830053	0.904204	0.777186	NA	NA	NA
63252967	endoglucanase	Acetivibrio cellulolyticus CD2	Carbon Cycling	Carbon degradation	Cellulose	superkingdom:Bacteria;phylum:Firmicutes;class:Clostridia;order:Clostridiales;family:Ruminococcaceae;genus:Acetivibrio;species:Acetivibrio cellulolyticus;	0.886557	0.849857	0.834892	0.814326	0.801152	0.887195	0.873274	NA	0.87517
366163785	endoglucanase	Acetivibrio cellulolyticus CD2	Carbon Cycling	Carbon degradation	Cellulose	superkingdom:Bacteria;phylum:Firmicutes;class:Clostridia;order:Clostridiales;family:Ruminococcaceae;genus:Acetivibrio;species:Acetivibrio cellulolyticus;	0.999395	0.804395	0.9231	0.798143	1.03026	0.881765	0.868724	0.791009	0.824031
366163394	endoglucanase	Acetivibrio cellulolyticus CD2	Carbon Cycling	Carbon degradation	Cellulose	superkingdom:Bacteria;phylum:Firmicutes;class:Clostridia;order:Clostridiales;family:Ruminococcaceae;genus:Acetivibrio;species:Acetivibrio cellulolyticus;	0.83289	0.857419	0.868462	0.786641	0.864519	0.728626	0.889974	0.9188	0.836538
303887	endoglucanase	Ruminococcus albus	Carbon Cycling	Carbon degradation	Cellulose	superkingdom:Bacteria;phylum:Firmicutes;class:Clostridia;order:Clostridiales;family:Ruminococcaceae;genus:Ruminococcus;	NA	NA	NA	NA	0.798704	0.817077	NA	0.859463	0.849995
291543738	endoglucanase	Ruminococcus sp. 18P13	Carbon Cycling	Carbon degradation	Cellulose	superkingdom:Bacteria;phylum:Firmicutes;class:Clostridia;order:Clostridiales;family:Ruminococcaceae;genus:Ruminococcus;species:Ruminococcus champanellensis;	0.89532	0.920532	0.906574	0.942512	0.896237	0.945403	0.889626	0.985362	0.917608
268611683	endoglucanase	Ruminococcus flavefaciens FD-1	Carbon Cycling	Carbon degradation	Cellulose	superkingdom:Bacteria;phylum:Firmicutes;class:Clostridia;order:Clostridiales;family:Ruminococcaceae;genus:Ruminococcus;species:Ruminococcus flavefaciens;	0.806197	0.806296	0.751951	0.769592	NA	0.779153	0.764345	NA	0.830082
268611682	endoglucanase	Ruminococcus flavefaciens FD-1	Carbon Cycling	Carbon degradation	Cellulose	superkingdom:Bacteria;phylum:Firmicutes;class:Clostridia;order:Clostridiales;family:Ruminococcaceae;genus:Ruminococcus;species:Ruminococcus flavefaciens;	0.878485	0.891449	0.879582	0.844804	0.910838	0.8555	0.849002	NA	0.892904
268611684	endoglucanase	Ruminococcus flavefaciens FD-1	Carbon Cycling	Carbon degradation	Cellulose	superkingdom:Bacteria;phylum:Firmicutes;class:Clostridia;order:Clostridiales;family:Ruminococcaceae;genus:Ruminococcus;species:Ruminococcus flavefaciens;	0.828842	0.762306	0.783203	0.804586	0.781893	0.835917	0.810114	NA	0.826204
222529844	endoglucanase	Caldicellulosiruptor bescii DSM 6725	Carbon Cycling	Carbon degradation	Cellulose	superkingdom:Bacteria;phylum:Firmicutes;class:Clostridia;order:Thermoanaerobacterales;family:Thermoanaerobacterales Family III. Incertae Sedis;genus:Caldicellulosiruptor;species:Caldicellulosiruptor bescii;	NA	NA	NA	0.891462	0.860383	0.879323	NA	NA	NA
343965765	endoglucanase	Caldicellulosiruptor lactoaceticus 6A	Carbon Cycling	Carbon degradation	Cellulose	superkingdom:Bacteria;phylum:Firmicutes;class:Clostridia;order:Thermoanaerobacterales;family:Thermoanaerobacterales Family III. Incertae Sedis;genus:Caldicellulosiruptor;species:Caldicellulosiruptor lactoaceticus;	1.13992	1.14404	1.17539	1.27235	1.17005	1.19381	1.15376	1.23678	1.19303
332981694	endoglucanase	Mahella australiensis 50-1 BON	Carbon Cycling	Carbon degradation	Cellulose	superkingdom:Bacteria;phylum:Firmicutes;class:Clostridia;order:Thermoanaerobacterales;family:Thermoanaerobacterales Family IV. Incertae Sedis;genus:Mahella;species:Mahella australiensis;	0.805162	NA	0.832162	0.722954	0.884645	NA	0.807921	0.786945	0.81775
329849762	endoglucanase	Asticcacaulis biprosthecum C19	Carbon Cycling	Carbon degradation	Cellulose	superkingdom:Bacteria;phylum:Proteobacteria;class:Alphaproteobacteria;order:Caulobacterales;family:Caulobacteraceae;genus:Asticcacaulis;species:Asticcacaulis biprosthecium;	1.17359	1.14428	1.16736	1.22327	1.20288	1.21309	1.1754	1.21083	1.18001
337759161	endoglucanase	Hyphomicrobium sp. MC1	Carbon Cycling	Carbon degradation	Cellulose	superkingdom:Bacteria;phylum:Proteobacteria;class:Alphaproteobacteria;order:Rhizobiales;family:Hyphomicrobiaceae;genus:Hyphomicrobium;	1.15444	1.13998	1.15067	1.23909	1.16057	1.21329	1.15429	1.19844	1.17308
170739375	endoglucanase	Methylobacterium sp. 4-46	Carbon Cycling	Carbon degradation	Cellulose	superkingdom:Bacteria;phylum:Proteobacteria;class:Alphaproteobacteria;order:Rhizobiales;family:Methylobacteriaceae;genus:Methylobacterium;	1.20593	1.1476	1.28232	1.16099	1.29491	1.12353	1.23452	1.20437	1.20352
149121623	endoglucanase	Methylobacterium sp. 4-46	Carbon Cycling	Carbon degradation	Cellulose	superkingdom:Bacteria;phylum:Proteobacteria;class:Alphaproteobacteria;order:Rhizobiales;family:Methylobacteriaceae;genus:Methylobacterium;	1.08316	1.07043	1.10224	1.18443	1.07663	1.09928	1.08626	1.1256	1.14719
221721940	endoglucanase	Agrobacterium radiobacter K84	Carbon Cycling	Carbon degradation	Cellulose	superkingdom:Bacteria;phylum:Proteobacteria;class:Alphaproteobacteria;order:Rhizobiales;family:Rhizobiaceae;genus:Agrobacterium;species:Agrobacterium tumefaciens;	1.029	1.00921	1.03102	1.09409	1.06118	1.07729	1.04382	1.0674	1.06291
221738133	endoglucanase	Agrobacterium vitis S4	Carbon Cycling	Carbon degradation	Cellulose	superkingdom:Bacteria;phylum:Proteobacteria;class:Alphaproteobacteria;order:Rhizobiales;family:Rhizobiaceae;genus:Agrobacterium;species:Agrobacterium vitis;	0.809747	NA	0.763005	NA	0.890543	0.779556	0.859006	NA	0.748046
86355887	endoglucanase	Rhizobium etli CFN 42	Carbon Cycling	Carbon degradation	Cellulose	superkingdom:Bacteria;phylum:Proteobacteria;class:Alphaproteobacteria;order:Rhizobiales;family:Rhizobiaceae;genus:Rhizobium;species:Rhizobium etli;	1.15035	1.16254	1.16689	1.14452	1.15257	1.23402	1.13629	1.18453	1.1893
218673552	endoglucanase	Rhizobium etli GR56	Carbon Cycling	Carbon degradation	Cellulose	superkingdom:Bacteria;phylum:Proteobacteria;class:Alphaproteobacteria;order:Rhizobiales;family:Rhizobiaceae;genus:Rhizobium;species:Rhizobium etli;	1.1072	0.991125	1.02345	1.00636	1.1427	1.07287	1.11208	1.01158	1.08536
190695181	endoglucanase	Rhizobium etli CIAT 652	Carbon Cycling	Carbon degradation	Cellulose	superkingdom:Bacteria;phylum:Proteobacteria;class:Alphaproteobacteria;order:Rhizobiales;family:Rhizobiaceae;genus:Rhizobium;species:Rhizobium etli;	0.831113	0.806794	0.793319	0.762449	0.831249	0.836524	0.823927	0.786722	0.856922
218680146	endoglucanase	Rhizobium etli CIAT 894	Carbon Cycling	Carbon degradation	Cellulose	superkingdom:Bacteria;phylum:Proteobacteria;class:Alphaproteobacteria;order:Rhizobiales;family:Rhizobiaceae;genus:Rhizobium;species:Rhizobium etli;	1.07008	1.06138	1.06728	1.17103	1.12214	1.12684	1.06322	1.13317	1.08754
110681866	endoglucanase	Rhizobium leguminosarum bv. trifolii	Carbon Cycling	Carbon degradation	Cellulose	superkingdom:Bacteria;phylum:Proteobacteria;class:Alphaproteobacteria;order:Rhizobiales;family:Rhizobiaceae;genus:Rhizobium;species:Rhizobium leguminosarum;	0.984171	0.884408	0.890823	0.774838	0.911946	1.00689	0.939444	0.814919	0.980445
307943024	endoglucanase	Roseibium sp. TrichSKD4	Carbon Cycling	Carbon degradation	Cellulose	superkingdom:Bacteria;phylum:Proteobacteria;class:Alphaproteobacteria;order:Rhodobacterales;family:Rhodobacteraceae;genus:Roseibium;	0.978214	1.01779	1.01392	1.04511	1.00385	0.965999	0.991299	1.04264	1.00788
363713893	endoglucanase	Acetobacteraceae bacterium AT-5844	Carbon Cycling	Carbon degradation	Cellulose	superkingdom:Bacteria;phylum:Proteobacteria;class:Alphaproteobacteria;order:Rhodospirillales;family:Acetobacteraceae;	1.08624	1.06301	1.08054	1.10192	1.05936	1.11588	1.10084	0.923071	1.14107
340776996	endoglucanase	Acetobacter aceti NBRC 14818	Carbon Cycling	Carbon degradation	Cellulose	superkingdom:Bacteria;phylum:Proteobacteria;class:Alphaproteobacteria;order:Rhodospirillales;family:Acetobacteraceae;genus:Acetobacter;species:Acetobacter aceti;	1.17778	1.15435	1.1904	1.18297	1.08485	1.19106	1.16846	0.989681	1.23129
329758681	endoglucanase	Gluconacetobacter sp. SXCC-1	Carbon Cycling	Carbon degradation	Cellulose	superkingdom:Bacteria;phylum:Proteobacteria;class:Alphaproteobacteria;order:Rhodospirillales;family:Acetobacteraceae;genus:Gluconacetobacter;	1.09927	1.05054	1.07696	1.09396	1.02864	1.07256	1.14615	1.08774	1.13857
209530632	endoglucanase	Gluconacetobacter diazotrophicus PAl 5	Carbon Cycling	Carbon degradation	Cellulose	superkingdom:Bacteria;phylum:Proteobacteria;class:Alphaproteobacteria;order:Rhodospirillales;family:Acetobacteraceae;genus:Gluconacetobacter;species:Gluconacetobacter diazotrophicus;	1.35221	1.32861	1.41934	1.30288	1.32564	1.31917	1.30998	1.28597	1.29686
349687963	endoglucanase	Gluconacetobacter oboediens 174Bp2	Carbon Cycling	Carbon degradation	Cellulose	superkingdom:Bacteria;phylum:Proteobacteria;class:Alphaproteobacteria;order:Rhodospirillales;family:Acetobacteraceae;genus:Gluconacetobacter;species:Gluconacetobacter oboediens;	1.30134	1.31311	1.30332	1.42664	1.30452	1.35305	1.27372	1.34804	1.34708
356882580	endoglucanase	Azospirillum brasilense Sp245	Carbon Cycling	Carbon degradation	Cellulose	superkingdom:Bacteria;phylum:Proteobacteria;class:Alphaproteobacteria;order:Rhodospirillales;family:Rhodospirillaceae;genus:Azospirillum;species:Azospirillum brasilense;	0.991575	0.979335	0.968579	1.07736	1.01391	1.00831	1.02306	1.02672	1.01538
356877783	endoglucanase	Azospirillum brasilense Sp245	Carbon Cycling	Carbon degradation	Cellulose	superkingdom:Bacteria;phylum:Proteobacteria;class:Alphaproteobacteria;order:Rhodospirillales;family:Rhodospirillaceae;genus:Azospirillum;species:Azospirillum brasilense;	1.22869	1.16425	1.24519	1.18204	1.3301	1.19901	1.20989	1.17703	1.21129
356879769	endoglucanase	Azospirillum brasilense Sp245	Carbon Cycling	Carbon degradation	Cellulose	superkingdom:Bacteria;phylum:Proteobacteria;class:Alphaproteobacteria;order:Rhodospirillales;family:Rhodospirillaceae;genus:Azospirillum;species:Azospirillum brasilense;	0.992984	0.981188	0.996989	0.937689	1.01493	0.972427	0.990201	0.999112	0.986152
357425901	endoglucanase	Azospirillum lipoferum 4B	Carbon Cycling	Carbon degradation	Cellulose	superkingdom:Bacteria;phylum:Proteobacteria;class:Alphaproteobacteria;order:Rhodospirillales;family:Rhodospirillaceae;genus:Azospirillum;species:Azospirillum lipoferum;	NA	NA	NA	NA	0.753124	0.795711	NA	NA	NA
288912732	endoglucanase	Azospirillum sp. B510	Carbon Cycling	Carbon degradation	Cellulose	superkingdom:Bacteria;phylum:Proteobacteria;class:Alphaproteobacteria;order:Rhodospirillales;family:Rhodospirillaceae;genus:Azospirillum;species:Azospirillum lipoferum;	1.39185	1.37253	1.37647	1.38641	1.3304	1.44088	1.33437	1.35657	1.35432
288914845	endoglucanase	Azospirillum sp. B510	Carbon Cycling	Carbon degradation	Cellulose	superkingdom:Bacteria;phylum:Proteobacteria;class:Alphaproteobacteria;order:Rhodospirillales;family:Rhodospirillaceae;genus:Azospirillum;species:Azospirillum lipoferum;	0.961538	0.824617	0.990063	0.954648	0.969833	1.0003	0.891401	0.883235	0.992886
294146631	endoglucanase	Sphingobium japonicum UT26S	Carbon Cycling	Carbon degradation	Cellulose	superkingdom:Bacteria;phylum:Proteobacteria;class:Alphaproteobacteria;order:Sphingomonadales;family:Sphingomonadaceae;genus:Sphingobium;species:Sphingobium japonicum;	1.1125	1.10744	1.12361	1.06603	1.09963	1.05012	1.07253	1.12646	1.07683
338782389	endoglucanase	Achromobacter xylosoxidans AXX-A	Carbon Cycling	Carbon degradation	Cellulose	superkingdom:Bacteria;phylum:Proteobacteria;class:Betaproteobacteria;order:Burkholderiales;family:Alcaligenaceae;genus:Achromobacter;species:Achromobacter xylosoxidans;	1.21404	1.16418	1.21614	1.24735	1.18023	1.24957	1.20456	1.15212	1.24695
115423688	endoglucanase	Bordetella avium 197N	Carbon Cycling	Carbon degradation	Cellulose	superkingdom:Bacteria;phylum:Proteobacteria;class:Betaproteobacteria;order:Burkholderiales;family:Alcaligenaceae;genus:Bordetella;species:Bordetella avium;	1.09927	1.09719	1.19987	1.07023	1.29619	1.10276	1.15155	1.1103	1.13295
167574798	endoglucanase	Burkholderia oklahomensis C6786	Carbon Cycling	Carbon degradation	Cellulose	superkingdom:Bacteria;phylum:Proteobacteria;class:Betaproteobacteria;order:Burkholderiales;family:Burkholderiaceae;genus:Burkholderia;species:Burkholderia oklahomensis;	1.10368	1.1295	1.13249	1.24101	1.13716	1.17943	1.1264	1.17212	1.18965
338168464	endoglucanase	Cupriavidus necator N-1	Carbon Cycling	Carbon degradation	Cellulose	superkingdom:Bacteria;phylum:Proteobacteria;class:Betaproteobacteria;order:Burkholderiales;family:Burkholderiaceae;genus:Cupriavidus;species:Cupriavidus necator;	1.03329	1.1009	1.08082	1.15799	1.038	1.12901	1.05472	1.11763	1.0955
149925938	endoglucanase	Limnobacter sp. MED105	Carbon Cycling	Carbon degradation	Cellulose	superkingdom:Bacteria;phylum:Proteobacteria;class:Betaproteobacteria;order:Burkholderiales;family:Burkholderiaceae;genus:Limnobacter;	1.0884	1.08688	1.09949	1.12946	1.11392	1.07218	1.10187	1.14457	1.11327
312270112	endoglucanase	Ralstonia solanacearum	Carbon Cycling	Carbon degradation	Cellulose	superkingdom:Bacteria;phylum:Proteobacteria;class:Betaproteobacteria;order:Burkholderiales;family:Burkholderiaceae;genus:Ralstonia;	1.27743	1.28744	1.27259	1.30333	1.31418	1.28761	1.28207	1.29902	1.32205
151208	endoglucanase	Ralstonia solanacearum	Carbon Cycling	Carbon degradation	Cellulose	superkingdom:Bacteria;phylum:Proteobacteria;class:Betaproteobacteria;order:Burkholderiales;family:Burkholderiaceae;genus:Ralstonia;	1.18823	1.20132	1.33645	1.15747	1.27259	1.19157	1.21413	1.22118	1.24227
312270114	endoglucanase	Ralstonia solanacearum	Carbon Cycling	Carbon degradation	Cellulose	superkingdom:Bacteria;phylum:Proteobacteria;class:Betaproteobacteria;order:Burkholderiales;family:Burkholderiaceae;genus:Ralstonia;	1.40706	1.41041	1.42269	1.48596	1.44082	1.41291	1.4153	1.41934	1.45974
312270020	endoglucanase	Ralstonia solanacearum	Carbon Cycling	Carbon degradation	Cellulose	superkingdom:Bacteria;phylum:Proteobacteria;class:Betaproteobacteria;order:Burkholderiales;family:Burkholderiaceae;genus:Ralstonia;	NA	NA	NA	NA	NA	NA	NA	0.84003	0.821107
207744735	endoglucanase	Ralstonia solanacearum IPO1609	Carbon Cycling	Carbon degradation	Cellulose	superkingdom:Bacteria;phylum:Proteobacteria;class:Betaproteobacteria;order:Burkholderiales;family:Burkholderiaceae;genus:Ralstonia;species:Ralstonia solanacearum;	1.00662	0.960148	0.993253	1.04989	0.968504	1.01343	0.985081	1.00279	1.00286
300702563	endoglucanase	Ralstonia solanacearum CFBP2957	Carbon Cycling	Carbon degradation	Cellulose	superkingdom:Bacteria;phylum:Proteobacteria;class:Betaproteobacteria;order:Burkholderiales;family:Burkholderiaceae;genus:Ralstonia;species:Ralstonia solanacearum;	1.0511	1.00927	1.03791	1.04751	1.07061	1.05662	1.04696	0.883836	1.07105
326316653	endoglucanase	Acidovorax avenae subsp. avenae ATCC 19860	Carbon Cycling	Carbon degradation	Cellulose	superkingdom:Bacteria;phylum:Proteobacteria;class:Betaproteobacteria;order:Burkholderiales;family:Comamonadaceae;genus:Acidovorax;species:Acidovorax avenae;	1.05373	0.99321	1.03032	1.00119	0.980492	1.03977	0.976695	1.07448	1.0587
120610779	endoglucanase	Acidovorax citrulli AAC00-1	Carbon Cycling	Carbon degradation	Cellulose	superkingdom:Bacteria;phylum:Proteobacteria;class:Betaproteobacteria;order:Burkholderiales;family:Comamonadaceae;genus:Acidovorax;species:Acidovorax citrulli;	0.9122	0.942275	0.943354	0.982813	0.924188	0.93738	0.90076	0.933158	0.959506
351729245	endoglucanase	Acidovorax radicis N35	Carbon Cycling	Carbon degradation	Cellulose	superkingdom:Bacteria;phylum:Proteobacteria;class:Betaproteobacteria;order:Burkholderiales;family:Comamonadaceae;genus:Acidovorax;species:Acidovorax radicis;	0.945961	0.847873	0.863566	0.907073	0.985365	0.930205	0.923959	0.843419	0.954074
340553182	endoglucanase	Collimonas fungivorans Ter331	Carbon Cycling	Carbon degradation	Cellulose	superkingdom:Bacteria;phylum:Proteobacteria;class:Betaproteobacteria;order:Burkholderiales;family:Oxalobacteraceae;genus:Collimonas;species:Collimonas fungivorans;	0.877543	0.92204	0.913865	0.983243	0.904673	0.94886	0.883804	0.889016	0.942353
331000563	endoglucanase	Parasutterella excrementihominis YIT 11859	Carbon Cycling	Carbon degradation	Cellulose	superkingdom:Bacteria;phylum:Proteobacteria;class:Betaproteobacteria;order:Burkholderiales;family:Sutterellaceae;genus:Parasutterella;species:Parasutterella excrementihominis;	1.01725	1.01027	1.03024	1.05463	1.05232	1.04548	0.984023	1.00388	1.01378
82884148	endoglucanase	Azoarcus sp. BH72	Carbon Cycling	Carbon degradation	Cellulose	superkingdom:Bacteria;phylum:Proteobacteria;class:Betaproteobacteria;order:Rhodocyclales;family:Rhodocyclaceae;genus:Azoarcus;	0.919551	0.909345	0.954918	0.825613	0.958823	0.899252	0.902544	0.883745	0.827837
115366578	endoglucanase	Stigmatella aurantiaca DW4/3-1	Carbon Cycling	Carbon degradation	Cellulose	superkingdom:Bacteria;phylum:Proteobacteria;class:Deltaproteobacteria;order:Myxococcales;family:Cystobacteraceae;genus:Stigmatella;species:Stigmatella aurantiaca;	1.01362	0.930011	1.03939	0.8544	1.01946	0.912556	1.01616	0.951315	0.922755
162449769	endoglucanase	Sorangium cellulosum _So ce 56_	Carbon Cycling	Carbon degradation	Cellulose	superkingdom:Bacteria;phylum:Proteobacteria;class:Deltaproteobacteria;order:Myxococcales;family:Polyangiaceae;genus:Sorangium;species:Sorangium cellulosum;	0.91248	0.9049	0.919764	0.942511	0.948128	0.947761	0.939045	0.80595	0.953431
161163768	endoglucanase	Sorangium cellulosum _So ce 56_	Carbon Cycling	Carbon degradation	Cellulose	superkingdom:Bacteria;phylum:Proteobacteria;class:Deltaproteobacteria;order:Myxococcales;family:Polyangiaceae;genus:Sorangium;species:Sorangium cellulosum;	1.00645	1.01149	1.01367	1.11153	1.03823	1.03942	0.998375	1.04379	1.03776
340555385	endoglucanase	Acidithiobacillus caldus SM-1	Carbon Cycling	Carbon degradation	Cellulose	superkingdom:Bacteria;phylum:Proteobacteria;class:Gammaproteobacteria;order:Acidithiobacillales;family:Acidithiobacillaceae;genus:Acidithiobacillus;species:Acidithiobacillus caldus;	0.903746	0.944737	1.01032	0.890342	0.888465	0.881488	0.940323	0.943828	0.924329
239937650	endoglucanase	Aeromonas sp. YS3	Carbon Cycling	Carbon degradation	Cellulose	superkingdom:Bacteria;phylum:Proteobacteria;class:Gammaproteobacteria;order:Aeromonadales;family:Aeromonadaceae;genus:Aeromonas;	1.06182	1.09728	1.09298	1.24539	1.04611	1.12697	1.09323	1.15485	1.11466
334703032	endoglucanase	Aeromonas caviae Ae398	Carbon Cycling	Carbon degradation	Cellulose	superkingdom:Bacteria;phylum:Proteobacteria;class:Gammaproteobacteria;order:Aeromonadales;family:Aeromonadaceae;genus:Aeromonas;species:Aeromonas caviae;	1.0796	1.02041	1.01288	1.0647	1.10289	1.14232	1.10389	0.845878	1.1272
374336696	endoglucanase	Oceanimonas sp. GK1	Carbon Cycling	Carbon degradation	Cellulose	superkingdom:Bacteria;phylum:Proteobacteria;class:Gammaproteobacteria;order:Aeromonadales;family:Aeromonadaceae;genus:Oceanimonas;	1.16314	1.14269	1.15994	1.11901	1.19211	1.1466	1.13839	0.948945	1.19355
89952479a	endoglucanase	Saccharophagus degradans 2-40	Carbon Cycling	Carbon degradation	Cellulose	superkingdom:Bacteria;phylum:Proteobacteria;class:Gammaproteobacteria;order:Alteromonadales;family:Alteromonadaceae;genus:Saccharophagus;species:Saccharophagus degradans;	0.930091	0.854153	0.969244	0.91261	1.0672	0.919602	0.906774	0.852134	0.897363
109897728	endoglucanase	Pseudoalteromonas atlantica T6c	Carbon Cycling	Carbon degradation	Cellulose	superkingdom:Bacteria;phylum:Proteobacteria;class:Gammaproteobacteria;order:Alteromonadales;family:Pseudoalteromonadaceae;genus:Pseudoalteromonas;species:Pseudoalteromonas atlantica;	0.864898	0.90807	0.876802	1.00147	0.882119	0.927318	0.866701	0.948298	0.909637
157086340	endoglucanase	Citrobacter koseri ATCC BAA-895	Carbon Cycling	Carbon degradation	Cellulose	superkingdom:Bacteria;phylum:Proteobacteria;class:Gammaproteobacteria;order:Enterobacteriales;family:Enterobacteriaceae;genus:Citrobacter;species:Citrobacter koseri;	0.975473	0.929084	0.947578	0.988593	0.861858	0.977123	0.931362	NA	0.997872
238871173	endoglucanase	Edwardsiella ictaluri 93-146	Carbon Cycling	Carbon degradation	Cellulose	superkingdom:Bacteria;phylum:Proteobacteria;class:Gammaproteobacteria;order:Enterobacteriales;family:Enterobacteriaceae;genus:Edwardsiella;species:Edwardsiella ictaluri;	1.05823	0.955989	1.00655	1.09041	1.18411	1.15512	1.04451	0.98569	1.1535
294638217	endoglucanase	Edwardsiella tarda ATCC 23685	Carbon Cycling	Carbon degradation	Cellulose	superkingdom:Bacteria;phylum:Proteobacteria;class:Gammaproteobacteria;order:Enterobacteriales;family:Enterobacteriaceae;genus:Edwardsiella;species:Edwardsiella tarda;	0.990138	0.969405	0.975684	0.986162	0.940583	1.02443	0.959422	1.03452	0.912578
304560504b	endoglucanase	Edwardsiella tarda FL6-60	Carbon Cycling	Carbon degradation	Cellulose	superkingdom:Bacteria;phylum:Proteobacteria;class:Gammaproteobacteria;order:Enterobacteriales;family:Enterobacteriaceae;genus:Edwardsiella;species:Edwardsiella tarda;	0.979862	0.990531	0.976467	1.05514	0.979906	1.01048	0.940967	0.986551	1.00465
334733735	endoglucanase	Enterobacter aerogenes KCTC 2190	Carbon Cycling	Carbon degradation	Cellulose	superkingdom:Bacteria;phylum:Proteobacteria;class:Gammaproteobacteria;order:Enterobacteriales;family:Enterobacteriaceae;genus:Enterobacter;species:Enterobacter aerogenes;	1.21316	1.09891	1.11234	1.1298	1.15491	1.24094	1.14071	1.01607	1.18061
288315928	endoglucanase	Enterobacter cancerogenus ATCC 35316	Carbon Cycling	Carbon degradation	Cellulose	superkingdom:Bacteria;phylum:Proteobacteria;class:Gammaproteobacteria;order:Enterobacteriales;family:Enterobacteriaceae;genus:Enterobacter;species:Enterobacter cancerogenus;	0.987674	1.03475	0.996759	1.12021	1.02718	1.06233	0.97817	1.0473	1.02511
365972609	endoglucanase	Enterobacter cloacae EcWSU1	Carbon Cycling	Carbon degradation	Cellulose	superkingdom:Bacteria;phylum:Proteobacteria;class:Gammaproteobacteria;order:Enterobacteriales;family:Enterobacteriaceae;genus:Enterobacter;species:Enterobacter cloacae;	NA	NA	NA	NA	0.754184	0.809088	0.786807	0.847521	0.821681
333392830	endoglucanase	Enterobacter hormaechei ATCC 49162	Carbon Cycling	Carbon degradation	Cellulose	superkingdom:Bacteria;phylum:Proteobacteria;class:Gammaproteobacteria;order:Enterobacteriales;family:Enterobacteriaceae;genus:Enterobacter;species:Enterobacter hormaechei;	1.04314	1.07235	1.0791	1.15277	1.05455	1.08991	1.04721	1.11302	1.11658
354725653	endoglucanase	Enterobacter mori LMG 25706	Carbon Cycling	Carbon degradation	Cellulose	superkingdom:Bacteria;phylum:Proteobacteria;class:Gammaproteobacteria;order:Enterobacteriales;family:Enterobacteriaceae;genus:Enterobacter;species:Enterobacter mori;	1.05507	1.04827	1.04132	1.00228	0.978612	1.04338	0.987194	1.04355	1.01495
49613817	endoglucanase	Pectobacterium atrosepticum SCRI1043	Carbon Cycling	Carbon degradation	Cellulose	superkingdom:Bacteria;phylum:Proteobacteria;class:Gammaproteobacteria;order:Enterobacteriales;family:Enterobacteriaceae;genus:Pectobacterium;species:Pectobacterium atrosepticum;	0.962774	0.959189	0.972373	0.954301	0.901227	1.00851	0.979548	NA	0.998912
50120908	endoglucanase	Pectobacterium atrosepticum SCRI1043	Carbon Cycling	Carbon degradation	Cellulose	superkingdom:Bacteria;phylum:Proteobacteria;class:Gammaproteobacteria;order:Enterobacteriales;family:Enterobacteriaceae;genus:Pectobacterium;species:Pectobacterium atrosepticum;	0.948282	0.826708	0.940199	0.945639	1.0349	0.977319	0.915352	0.891746	0.948747
227328208	endoglucanase	Pectobacterium carotovorum subsp. carotovorum WPP14	Carbon Cycling	Carbon degradation	Cellulose	superkingdom:Bacteria;phylum:Proteobacteria;class:Gammaproteobacteria;order:Enterobacteriales;family:Enterobacteriaceae;genus:Pectobacterium;species:Pectobacterium carotovorum;	0.816054	0.852445	0.83615	0.912062	0.845533	0.854214	0.812025	0.894143	0.857261
227113871	endoglucanase	Pectobacterium carotovorum subsp. brasiliensis PBR1692	Carbon Cycling	Carbon degradation	Cellulose	superkingdom:Bacteria;phylum:Proteobacteria;class:Gammaproteobacteria;order:Enterobacteriales;family:Enterobacteriaceae;genus:Pectobacterium;species:Pectobacterium carotovorum;	1.21033	1.19293	1.24582	1.20375	1.2114	1.24335	1.18026	1.27954	1.23447
253688715	endoglucanase	Pectobacterium carotovorum subsp. carotovorum PC1	Carbon Cycling	Carbon degradation	Cellulose	superkingdom:Bacteria;phylum:Proteobacteria;class:Gammaproteobacteria;order:Enterobacteriales;family:Enterobacteriaceae;genus:Pectobacterium;species:Pectobacterium carotovorum;	1.04021	0.965674	0.819099	1.04969	0.942788	1.16688	1.02718	0.869455	1.099
340001140	endoglucanase	Salmonella bongori NCTC 12419	Carbon Cycling	Carbon degradation	Cellulose	superkingdom:Bacteria;phylum:Proteobacteria;class:Gammaproteobacteria;order:Enterobacteriales;family:Enterobacteriaceae;genus:Salmonella;species:Salmonella bongori;	1.04028	1.04061	1.02374	1.02834	0.990546	1.09197	1.02387	0.987184	1.00831
157320163	endoglucanase	Serratia proteamaculans 568	Carbon Cycling	Carbon degradation	Cellulose	superkingdom:Bacteria;phylum:Proteobacteria;class:Gammaproteobacteria;order:Enterobacteriales;family:Enterobacteriaceae;genus:Serratia;species:Serratia proteamaculans;	0.815959	NA	0.885127	0.714191	0.796963	NA	0.799089	0.797189	NA
351780310	endoglucanase	Yersinia enterocolitica subsp. palearctica PhRBD_Ye1	Carbon Cycling	Carbon degradation	Cellulose	superkingdom:Bacteria;phylum:Proteobacteria;class:Gammaproteobacteria;order:Enterobacteriales;family:Enterobacteriaceae;genus:Yersinia;species:Yersinia enterocolitica;	NA	NA	NA	NA	0.857346	0.756978	0.852739	0.81676	0.751406
122091206a	endoglucanase	Yersinia enterocolitica subsp. enterocolitica 8081	Carbon Cycling	Carbon degradation	Cellulose	superkingdom:Bacteria;phylum:Proteobacteria;class:Gammaproteobacteria;order:Enterobacteriales;family:Enterobacteriaceae;genus:Yersinia;species:Yersinia enterocolitica;	0.909993	0.819439	0.86336	0.797978	1.00383	0.909651	0.891496	0.816157	0.925244
238724064	endoglucanase	Yersinia frederiksenii ATCC 33641	Carbon Cycling	Carbon degradation	Cellulose	superkingdom:Bacteria;phylum:Proteobacteria;class:Gammaproteobacteria;order:Enterobacteriales;family:Enterobacteriaceae;genus:Yersinia;species:Yersinia frederiksenii;	1.05938	1.00765	1.00741	1.01985	0.98376	1.0709	1.04411	0.790549	1.03962
238761483	endoglucanase	Yersinia kristensenii ATCC 33638	Carbon Cycling	Carbon degradation	Cellulose	superkingdom:Bacteria;phylum:Proteobacteria;class:Gammaproteobacteria;order:Enterobacteriales;family:Enterobacteriaceae;genus:Yersinia;species:Yersinia kristensenii;	1.17003	1.11668	1.11452	1.14013	1.10824	1.17691	1.10056	1.05708	1.06876
365847180	endoglucanase	Yokenella regensburgei ATCC 43003	Carbon Cycling	Carbon degradation	Cellulose	superkingdom:Bacteria;phylum:Proteobacteria;class:Gammaproteobacteria;order:Enterobacteriales;family:Enterobacteriaceae;genus:Yokenella;species:Yokenella regensburgei;	0.996651	0.866536	0.939508	0.854673	1.01771	0.936212	0.951141	0.891598	0.945949
83634669	endoglucanase	Hahella chejuensis KCTC 2396	Carbon Cycling	Carbon degradation	Cellulose	superkingdom:Bacteria;phylum:Proteobacteria;class:Gammaproteobacteria;order:Oceanospirillales;family:Hahellaceae;genus:Hahella;species:Hahella chejuensis;	1.28031	1.24247	1.2669	1.30978	1.29154	1.30017	1.29391	1.21863	1.32055
18535634	endoglucanase	Pseudomonas fluorescens	Carbon Cycling	Carbon degradation	Cellulose	superkingdom:Bacteria;phylum:Proteobacteria;class:Gammaproteobacteria;order:Pseudomonadales;family:Pseudomonadaceae;genus:Pseudomonas;	1.07382	1.08068	1.1064	1.1875	1.07589	1.11548	1.10655	1.16992	1.11687
148977391	endoglucanase	Vibrionales bacterium SWAT-3	Carbon Cycling	Carbon degradation	Cellulose	superkingdom:Bacteria;phylum:Proteobacteria;class:Gammaproteobacteria;order:Vibrionales;	0.801571	0.78686	0.80928	0.905788	0.787065	0.822709	0.811715	0.924415	0.848133
379044668	endoglucanase	Frateuria aurantia DSM 6220	Carbon Cycling	Carbon degradation	Cellulose	superkingdom:Bacteria;phylum:Proteobacteria;class:Gammaproteobacteria;order:Xanthomonadales;family:Xanthomonadaceae;genus:Frateuria;species:Frateuria aurantia;	1.01267	1.05086	1.01394	1.09033	1.00228	1.01489	0.993644	1.06316	1.07761
379044663	endoglucanase	Frateuria aurantia DSM 6220	Carbon Cycling	Carbon degradation	Cellulose	superkingdom:Bacteria;phylum:Proteobacteria;class:Gammaproteobacteria;order:Xanthomonadales;family:Xanthomonadaceae;genus:Frateuria;species:Frateuria aurantia;	1.02382	0.960799	0.960771	0.955982	0.955477	1.04347	1.02367	0.825988	0.973161
355333711	endoglucanase	Pseudoxanthomonas spadix BD-a59	Carbon Cycling	Carbon degradation	Cellulose	superkingdom:Bacteria;phylum:Proteobacteria;class:Gammaproteobacteria;order:Xanthomonadales;family:Xanthomonadaceae;genus:Pseudoxanthomonas;species:Pseudoxanthomonas spadix;	1.17939	1.16257	1.1962	1.11802	1.21667	1.15412	1.12699	1.16842	1.11836
355333712	endoglucanase	Pseudoxanthomonas spadix BD-a59	Carbon Cycling	Carbon degradation	Cellulose	superkingdom:Bacteria;phylum:Proteobacteria;class:Gammaproteobacteria;order:Xanthomonadales;family:Xanthomonadaceae;genus:Pseudoxanthomonas;species:Pseudoxanthomonas spadix;	1.3479	1.26681	1.32685	1.24629	1.3438	1.35439	1.36254	1.28786	1.37814
285019729	endoglucanase	Xanthomonas albilineans GPE PC73	Carbon Cycling	Carbon degradation	Cellulose	superkingdom:Bacteria;phylum:Proteobacteria;class:Gammaproteobacteria;order:Xanthomonadales;family:Xanthomonadaceae;genus:Xanthomonas;species:Xanthomonas albilineans;	0.847332	0.797114	0.810257	0.731579	NA	0.827436	0.760444	NA	0.82648
285019727	endoglucanase	Xanthomonas albilineans GPE PC73	Carbon Cycling	Carbon degradation	Cellulose	superkingdom:Bacteria;phylum:Proteobacteria;class:Gammaproteobacteria;order:Xanthomonadales;family:Xanthomonadaceae;genus:Xanthomonas;species:Xanthomonas albilineans;	0.790742	NA	0.784571	0.713203	0.954757	NA	0.773698	NA	0.798187
325923248	endoglucanase	Xanthomonas gardneri ATCC 19865	Carbon Cycling	Carbon degradation	Cellulose	superkingdom:Bacteria;phylum:Proteobacteria;class:Gammaproteobacteria;order:Xanthomonadales;family:Xanthomonadaceae;genus:Xanthomonas;species:Xanthomonas gardneri;	0.945497	0.850525	0.968282	0.926332	0.993197	1.01878	0.889342	0.895254	1.03812
325546273	endoglucanase	Xanthomonas gardneri ATCC 19865	Carbon Cycling	Carbon degradation	Cellulose	superkingdom:Bacteria;phylum:Proteobacteria;class:Gammaproteobacteria;order:Xanthomonadales;family:Xanthomonadaceae;genus:Xanthomonas;species:Xanthomonas gardneri;	NA	NA	NA	0.776376	0.742814	0.795698	0.759303	NA	0.797577
325546271	endoglucanase	Xanthomonas gardneri ATCC 19865	Carbon Cycling	Carbon degradation	Cellulose	superkingdom:Bacteria;phylum:Proteobacteria;class:Gammaproteobacteria;order:Xanthomonadales;family:Xanthomonadaceae;genus:Xanthomonas;species:Xanthomonas gardneri;	0.960321	0.954201	0.974663	0.895645	1.05082	1.02197	0.975405	0.968722	0.933011
289662252	endoglucanase	Xanthomonas campestris pv. vasculorum NCPPB 702	Carbon Cycling	Carbon degradation	Cellulose	superkingdom:Bacteria;phylum:Proteobacteria;class:Gammaproteobacteria;order:Xanthomonadales;family:Xanthomonadaceae;genus:Xanthomonas;species:Xanthomonas vasicola;	0.955223	0.908185	1.0173	0.877089	0.959251	0.853657	0.972103	0.934577	0.935718
325538089	endoglucanase	Xanthomonas vesicatoria ATCC 35937	Carbon Cycling	Carbon degradation	Cellulose	superkingdom:Bacteria;phylum:Proteobacteria;class:Gammaproteobacteria;order:Xanthomonadales;family:Xanthomonadaceae;genus:Xanthomonas;species:Xanthomonas vesicatoria;	1.03808	0.973289	0.97608	0.938168	1.10124	1.0125	0.989645	0.970866	0.965674
325914448	endoglucanase	Xanthomonas vesicatoria ATCC 35937	Carbon Cycling	Carbon degradation	Cellulose	superkingdom:Bacteria;phylum:Proteobacteria;class:Gammaproteobacteria;order:Xanthomonadales;family:Xanthomonadaceae;genus:Xanthomonas;species:Xanthomonas vesicatoria;	0.892482	0.851982	0.816824	0.868927	1.09656	0.883527	0.870641	0.797568	0.921498
325915673	endoglucanase	Xanthomonas vesicatoria ATCC 35937	Carbon Cycling	Carbon degradation	Cellulose	superkingdom:Bacteria;phylum:Proteobacteria;class:Gammaproteobacteria;order:Xanthomonadales;family:Xanthomonadaceae;genus:Xanthomonas;species:Xanthomonas vesicatoria;	1.18688	1.19411	1.21648	1.19646	1.22761	1.17481	1.17998	1.18661	1.15457
325539471	endoglucanase	Xanthomonas vesicatoria ATCC 35937	Carbon Cycling	Carbon degradation	Cellulose	superkingdom:Bacteria;phylum:Proteobacteria;class:Gammaproteobacteria;order:Xanthomonadales;family:Xanthomonadaceae;genus:Xanthomonas;species:Xanthomonas vesicatoria;	1.18202	1.13313	1.15404	1.17697	1.13949	1.24244	1.14249	1.1732	1.16711
15837420	endoglucanase	Xylella fastidiosa 9a5c	Carbon Cycling	Carbon degradation	Cellulose	superkingdom:Bacteria;phylum:Proteobacteria;class:Gammaproteobacteria;order:Xanthomonadales;family:Xanthomonadaceae;genus:Xylella;species:Xylella fastidiosa;	0.979463	0.932281	0.969947	1.04759	0.996144	1.02016	0.979429	1.0601	1.01046
359687775	endoglucanase	Leptospira licerasiae serovar Varillal str. MMD0835	Carbon Cycling	Carbon degradation	Cellulose	superkingdom:Bacteria;phylum:Spirochaetes;class:Spirochaetia;order:Spirochaetales;family:Leptospiraceae;genus:Leptospira;species:Leptospira licerasiae;	0.801227	NA	0.827705	NA	NA	NA	NA	NA	NA
254446357	endoglucanase	Verrucomicrobiae bacterium DG1235	Carbon Cycling	Carbon degradation	Cellulose	superkingdom:Bacteria;phylum:Verrucomicrobia;class:Verrucomicrobiae;order:Verrucomicrobiales;	0.816501	NA	0.827962	0.692267	0.920328	NA	0.782068	0.796499	0.749256
223937220	endoglucanase	bacterium Ellin514	Carbon Cycling	Carbon degradation	Cellulose	superkingdom:Bacteria;phylum:Verrucomicrobia;class:Verrucomicrobiae;order:Verrucomicrobiales;family:Verrucomicrobia subdivision 3;genus:Pedosphaera;species:Pedosphaera parvula;	1.05609	1.07929	1.07517	1.2027	1.07012	1.11303	1.0375	1.14992	1.08963
456029	exoglucanase	NA	Carbon Cycling	Carbon degradation	Cellulose	superkingdom:Bacteria;phylum:Actinobacteria;class:Actinobacteria;order:Actinomycetales;family:Cellulomonadaceae;genus:Cellulomonas;	1.22815	1.19211	1.35206	1.26942	1.31918	1.22897	1.23611	1.23781	1.22003
144425	exoglucanase	NA	Carbon Cycling	Carbon degradation	Cellulose	superkingdom:Bacteria;phylum:Actinobacteria;class:Actinobacteria;order:Actinomycetales;family:Cellulomonadaceae;genus:Cellulomonas;	1.14713	1.09721	1.06464	1.09015	1.01596	1.1494	1.10579	1.00278	1.13387
790698	exoglucanase	NA	Carbon Cycling	Carbon degradation	Cellulose	superkingdom:Bacteria;phylum:Actinobacteria;class:Actinobacteria;order:Actinomycetales;family:Cellulomonadaceae;genus:Cellulomonas;	0.847506	0.870179	0.880324	1.02436	0.858699	0.92945	0.850385	0.960297	0.88115
336320808	exoglucanase	Cellvibrio] gilvus ATCC 13127	Carbon Cycling	Carbon degradation	Cellulose	superkingdom:Bacteria;phylum:Actinobacteria;class:Actinobacteria;order:Actinomycetales;family:Cellulomonadaceae;genus:Cellulomonas;species:[Cellvibrio] gilvus;	1.22732	1.22098	1.24065	1.30185	1.23885	1.22713	1.24236	1.21663	1.27695
256831975	exoglucanase	Jonesia denitrificans DSM 20603	Carbon Cycling	Carbon degradation	Cellulose	superkingdom:Bacteria;phylum:Actinobacteria;class:Actinobacteria;order:Actinomycetales;family:Jonesiaceae;genus:Jonesia;species:Jonesia denitrificans;	0.778675	0.817293	0.830932	0.847622	0.956277	0.843841	NA	0.784704	0.863945
71914756	exoglucanase	Thermobifida fusca YX	Carbon Cycling	Carbon degradation	Cellulose	superkingdom:Bacteria;phylum:Actinobacteria;class:Actinobacteria;order:Actinomycetales;family:Nocardiopsaceae;genus:Thermobifida;species:Thermobifida fusca;	1.08857	1.02353	1.07038	1.03972	1.09349	1.08545	1.0663	1.06191	1.07205
340528563	exoglucanase	Amycolatopsis mediterranei S699	Carbon Cycling	Carbon degradation	Cellulose	superkingdom:Bacteria;phylum:Actinobacteria;class:Actinobacteria;order:Actinomycetales;family:Pseudonocardiaceae;genus:Amycolatopsis;species:Amycolatopsis mediterranei;	0.999601	0.992427	0.988669	1.02646	1.03343	1.06957	1.0201	0.972238	1.02291
3560021b	exoglucanase	Streptomyces coelicolor A3(2)	Carbon Cycling	Carbon degradation	Cellulose	superkingdom:Bacteria;phylum:Actinobacteria;class:Actinobacteria;order:Actinomycetales;family:Streptomycetaceae;genus:Streptomyces;species:Streptomyces coelicolor;	1.15748	1.15253	1.18109	1.13373	1.19387	1.13035	1.15991	0.879144	1.18656
21449824	exoglucanase	Paenibacillus barcinonensis	Carbon Cycling	Carbon degradation	Cellulose	superkingdom:Bacteria;phylum:Firmicutes;class:Bacilli;order:Bacillales;family:Paenibacillaceae;genus:Paenibacillus;	0.779525	0.787799	0.769563	NA	0.784872	0.789212	NA	NA	NA
537500c	exoglucanase	NA	Carbon Cycling	Carbon degradation	Cellulose	superkingdom:Bacteria;phylum:Firmicutes;class:Clostridia;order:Thermoanaerobacterales;family:Thermoanaerobacterales Family III. Incertae Sedis;genus:Caldicellulosiruptor;	0.945761	0.936602	0.944173	0.932849	0.917104	0.986289	0.90676	0.985592	0.925602
2437819b	exoglucanase	Anaerocellum thermophilum	Carbon Cycling	Carbon degradation	Cellulose	superkingdom:Bacteria;phylum:Firmicutes;class:Clostridia;order:Thermoanaerobacterales;family:Thermoanaerobacterales Family III. Incertae Sedis;genus:Caldicellulosiruptor;	0.83447	0.814419	0.846327	0.821184	0.763298	0.883111	0.865253	0.83197	0.826671
89243225	exoglucanase	Myxobacter sp. AL-1	Carbon Cycling	Carbon degradation	Cellulose	superkingdom:Bacteria;phylum:Proteobacteria;class:Deltaproteobacteria;order:Myxococcales;genus:Myxobacter;	0.813329	0.804087	0.833601	0.751723	0.798127	0.799331	0.818277	NA	0.782364
165880057	exoglucanase	uncultured fungus	Carbon Cycling	Carbon degradation	Cellulose	superkingdom:Eukaryota;kingdom:Fungi;	0.969953	0.995694	1.00631	0.943771	0.959643	0.949324	0.938097	0.978266	0.922434
291196982	exoglucanase	uncultured fungus	Carbon Cycling	Carbon degradation	Cellulose	superkingdom:Eukaryota;kingdom:Fungi;	1.04122	1.09277	1.04454	1.05652	1.09521	1.11949	1.08788	1.14206	1.10961
165879995	exoglucanase	uncultured fungus	Carbon Cycling	Carbon degradation	Cellulose	superkingdom:Eukaryota;kingdom:Fungi;	1.33418	1.31698	1.34243	1.41292	1.3337	1.35998	1.33941	1.32381	1.38982
291197162	exoglucanase	uncultured fungus	Carbon Cycling	Carbon degradation	Cellulose	superkingdom:Eukaryota;kingdom:Fungi;	0.913992	0.824377	0.817493	0.77303	0.871832	0.877632	0.962383	0.818163	0.990808
291197060	exoglucanase	uncultured fungus	Carbon Cycling	Carbon degradation	Cellulose	superkingdom:Eukaryota;kingdom:Fungi;	0.838335	0.838923	0.79012	0.799846	0.739271	0.854771	0.757801	0.812729	0.824907
213536703	exoglucanase	uncultured fungus	Carbon Cycling	Carbon degradation	Cellulose	superkingdom:Eukaryota;kingdom:Fungi;	1.06528	0.944094	0.988205	0.934609	1.11575	0.953507	0.980139	0.978426	0.981435
291197080	exoglucanase	uncultured fungus	Carbon Cycling	Carbon degradation	Cellulose	superkingdom:Eukaryota;kingdom:Fungi;	0.885635	0.807662	0.930324	0.797488	0.895243	0.803694	0.903241	0.875201	0.776201
213536713	exoglucanase	uncultured fungus	Carbon Cycling	Carbon degradation	Cellulose	superkingdom:Eukaryota;kingdom:Fungi;	0.88966	0.923521	0.901188	0.931091	0.854766	0.896203	0.877144	0.904367	0.906064
165880037	exoglucanase	uncultured fungus	Carbon Cycling	Carbon degradation	Cellulose	superkingdom:Eukaryota;kingdom:Fungi;	1.25428	1.28562	1.31969	1.33131	1.18833	1.25073	1.27938	1.21844	1.24342
291196976	exoglucanase	uncultured fungus	Carbon Cycling	Carbon degradation	Cellulose	superkingdom:Eukaryota;kingdom:Fungi;	0.815025	NA	0.732036	0.72177	0.857945	0.822873	NA	NA	NA
291197072	exoglucanase	uncultured fungus	Carbon Cycling	Carbon degradation	Cellulose	superkingdom:Eukaryota;kingdom:Fungi;	1.01915	1.04406	1.04026	1.05675	0.975498	1.01911	0.985474	1.0326	1.04747
291196980	exoglucanase	uncultured fungus	Carbon Cycling	Carbon degradation	Cellulose	superkingdom:Eukaryota;kingdom:Fungi;	0.911277	0.932476	0.911429	0.981765	0.883122	0.971352	0.931859	0.953085	0.934474
291197244	exoglucanase	uncultured fungus	Carbon Cycling	Carbon degradation	Cellulose	superkingdom:Eukaryota;kingdom:Fungi;	0.761482	NA	0.739632	0.802926	NA	0.879414	NA	NA	NA
165880013	exoglucanase	uncultured fungus	Carbon Cycling	Carbon degradation	Cellulose	superkingdom:Eukaryota;kingdom:Fungi;	1.31182	1.32611	1.31374	1.41812	1.32069	1.35121	1.32316	1.398	1.3978
291196984	exoglucanase	uncultured fungus	Carbon Cycling	Carbon degradation	Cellulose	superkingdom:Eukaryota;kingdom:Fungi;	1.21601	1.15185	1.23901	1.18583	1.16909	1.20138	1.15626	1.12549	1.16648
291197130	exoglucanase	uncultured fungus	Carbon Cycling	Carbon degradation	Cellulose	superkingdom:Eukaryota;kingdom:Fungi;	1.07901	1.09898	1.22385	1.05159	1.15553	1.10337	1.07665	1.04856	1.15928
165880077	exoglucanase	uncultured fungus	Carbon Cycling	Carbon degradation	Cellulose	superkingdom:Eukaryota;kingdom:Fungi;	0.98558	0.968675	0.973828	1.00014	1.01042	1.00307	0.99194	0.843228	1.02304
165880025	exoglucanase	uncultured fungus	Carbon Cycling	Carbon degradation	Cellulose	superkingdom:Eukaryota;kingdom:Fungi;	1.02871	1.06937	1.06196	1.20372	1.09725	1.12951	1.06395	1.11019	1.10505
165879987	exoglucanase	uncultured fungus	Carbon Cycling	Carbon degradation	Cellulose	superkingdom:Eukaryota;kingdom:Fungi;	0.850142	0.894403	0.873462	0.976375	0.885249	0.940176	0.870861	0.941561	0.911631
213536677	exoglucanase	uncultured fungus	Carbon Cycling	Carbon degradation	Cellulose	superkingdom:Eukaryota;kingdom:Fungi;	0.834276	0.798588	0.833302	0.802208	0.784524	0.812542	0.806613	NA	0.839365
291197204	exoglucanase	uncultured fungus	Carbon Cycling	Carbon degradation	Cellulose	superkingdom:Eukaryota;kingdom:Fungi;	0.990999	1.02499	0.996217	1.14078	0.995023	1.06719	0.999312	1.06043	1.02938
291197154	exoglucanase	uncultured fungus	Carbon Cycling	Carbon degradation	Cellulose	superkingdom:Eukaryota;kingdom:Fungi;	1.09228	1.1547	1.12234	1.18958	1.12952	1.14043	1.08947	1.11411	1.1237
291197202	exoglucanase	uncultured fungus	Carbon Cycling	Carbon degradation	Cellulose	superkingdom:Eukaryota;kingdom:Fungi;	1.20361	1.07677	1.10409	1.07369	1.18787	1.17957	1.25127	1.09272	1.16394
291197260	exoglucanase	uncultured fungus	Carbon Cycling	Carbon degradation	Cellulose	superkingdom:Eukaryota;kingdom:Fungi;	1.06229	1.05925	1.10715	1.01969	1.08806	1.03619	1.07122	1.08706	1.04854
165880003	exoglucanase	uncultured fungus	Carbon Cycling	Carbon degradation	Cellulose	superkingdom:Eukaryota;kingdom:Fungi;	0.842813	0.892898	0.904886	0.846434	0.860161	0.952613	0.871793	0.928718	0.894937
291197012	exoglucanase	uncultured fungus	Carbon Cycling	Carbon degradation	Cellulose	superkingdom:Eukaryota;kingdom:Fungi;	0.935109	0.919917	1.03543	0.897586	0.984291	0.915884	0.913999	0.933699	0.982697
291197190	exoglucanase	uncultured fungus	Carbon Cycling	Carbon degradation	Cellulose	superkingdom:Eukaryota;kingdom:Fungi;	0.904464	0.90266	0.888119	0.933477	0.892258	0.941793	0.888149	0.880486	0.922496
291197184	exoglucanase	uncultured fungus	Carbon Cycling	Carbon degradation	Cellulose	superkingdom:Eukaryota;kingdom:Fungi;	0.795356	0.85205	0.788674	0.870925	0.795042	0.853934	NA	0.862331	0.847034
213536663	exoglucanase	uncultured fungus	Carbon Cycling	Carbon degradation	Cellulose	superkingdom:Eukaryota;kingdom:Fungi;	0.943739	0.954756	0.925698	1.0314	0.962667	1.00793	0.94552	1.01277	0.954219
291197224	exoglucanase	uncultured fungus	Carbon Cycling	Carbon degradation	Cellulose	superkingdom:Eukaryota;kingdom:Fungi;	1.0923	0.986606	1.01071	0.974422	1.16564	1.12637	1.1734	0.99373	1.02019
291197232	exoglucanase	uncultured fungus	Carbon Cycling	Carbon degradation	Cellulose	superkingdom:Eukaryota;kingdom:Fungi;	1.05408	1.06415	1.07436	1.03337	1.06311	1.0763	1.09164	1.07796	1.03956
165880041	exoglucanase	uncultured fungus	Carbon Cycling	Carbon degradation	Cellulose	superkingdom:Eukaryota;kingdom:Fungi;	0.867964	0.868726	NA	0.952005	1.00595	1.03373	0.848115	0.775939	0.955715
165880027	exoglucanase	uncultured fungus	Carbon Cycling	Carbon degradation	Cellulose	superkingdom:Eukaryota;kingdom:Fungi;	0.907953	0.962965	0.933816	1.01557	0.874932	0.973646	0.902659	0.946091	0.930087
213536669	exoglucanase	uncultured fungus	Carbon Cycling	Carbon degradation	Cellulose	superkingdom:Eukaryota;kingdom:Fungi;	0.902449	0.884388	0.863443	0.941955	0.859193	0.931156	0.837541	0.894721	0.886589
291197146	exoglucanase	uncultured fungus	Carbon Cycling	Carbon degradation	Cellulose	superkingdom:Eukaryota;kingdom:Fungi;	NA	NA	NA	0.741508	NA	0.725175	NA	NA	NA
291197034	exoglucanase	uncultured fungus	Carbon Cycling	Carbon degradation	Cellulose	superkingdom:Eukaryota;kingdom:Fungi;	1.00468	0.999716	1.11057	0.938431	1.07551	0.945439	1.00453	0.962367	0.921528
213536817	exoglucanase	uncultured fungus	Carbon Cycling	Carbon degradation	Cellulose	superkingdom:Eukaryota;kingdom:Fungi;	0.852091	0.806261	0.831205	0.81092	0.850596	0.82664	0.815386	NA	0.791833
165880079	exoglucanase	uncultured fungus	Carbon Cycling	Carbon degradation	Cellulose	superkingdom:Eukaryota;kingdom:Fungi;	0.829048	0.852198	0.819784	0.853767	0.766973	0.890642	0.792214	0.861132	0.758909
291197164	exoglucanase	uncultured fungus	Carbon Cycling	Carbon degradation	Cellulose	superkingdom:Eukaryota;kingdom:Fungi;	0.903214	0.875408	0.907859	0.955819	0.906923	0.901768	0.881747	0.922346	0.909905
165880015	exoglucanase	uncultured fungus	Carbon Cycling	Carbon degradation	Cellulose	superkingdom:Eukaryota;kingdom:Fungi;	0.876769	0.955792	0.921238	1.02797	0.927206	0.96966	0.884682	0.969594	0.9734
291197210	exoglucanase	uncultured fungus	Carbon Cycling	Carbon degradation	Cellulose	superkingdom:Eukaryota;kingdom:Fungi;	1.14093	1.10688	1.12004	1.14616	1.05031	1.13121	1.13311	0.977882	1.14312
165880017	exoglucanase	uncultured fungus	Carbon Cycling	Carbon degradation	Cellulose	superkingdom:Eukaryota;kingdom:Fungi;	0.962791	1.01339	1.01826	1.07568	0.971139	1.01656	0.976747	1.04035	1.03718
291196998	exoglucanase	uncultured fungus	Carbon Cycling	Carbon degradation	Cellulose	superkingdom:Eukaryota;kingdom:Fungi;	1.08936	1.02888	0.972378	0.960423	1.03134	1.08325	1.09666	0.957449	1.09346
291197242	exoglucanase	uncultured fungus	Carbon Cycling	Carbon degradation	Cellulose	superkingdom:Eukaryota;kingdom:Fungi;	0.964517	0.954221	0.965165	0.98233	1.02977	1.0005	0.969622	0.776277	0.997852
165880043	exoglucanase	uncultured fungus	Carbon Cycling	Carbon degradation	Cellulose	superkingdom:Eukaryota;kingdom:Fungi;	0.905094	0.760878	0.842209	0.851117	0.893334	0.88727	0.827033	0.80982	0.932595
291197186	exoglucanase	uncultured fungus	Carbon Cycling	Carbon degradation	Cellulose	superkingdom:Eukaryota;kingdom:Fungi;	0.929053	0.918081	0.939469	0.864412	0.906237	0.920267	0.952598	0.94304	0.887794
291197048	exoglucanase	uncultured fungus	Carbon Cycling	Carbon degradation	Cellulose	superkingdom:Eukaryota;kingdom:Fungi;	NA	NA	NA	NA	0.771697	0.769359	NA	NA	NA
165880055	exoglucanase	uncultured fungus	Carbon Cycling	Carbon degradation	Cellulose	superkingdom:Eukaryota;kingdom:Fungi;	0.987946	0.944361	0.979108	0.95543	0.997618	0.989075	0.960462	0.827952	1.0157
165880035	exoglucanase	uncultured fungus	Carbon Cycling	Carbon degradation	Cellulose	superkingdom:Eukaryota;kingdom:Fungi;	0.802226	0.789176	0.814044	0.698778	0.81059	0.765794	0.764512	NA	0.805876
213536773	exoglucanase	uncultured fungus	Carbon Cycling	Carbon degradation	Cellulose	superkingdom:Eukaryota;kingdom:Fungi;	0.923791	0.902261	0.879799	0.95811	0.937284	0.909835	0.91441	0.932219	0.927594
29160351	exoglucanase	Poitrasia circinans	Carbon Cycling	Carbon degradation	Cellulose	superkingdom:Eukaryota;kingdom:Fungi;order:Mucorales;family:Choanephoraceae;genus:Poitrasia;	0.980002	1.01606	0.984908	1.05412	1.00798	1.04257	0.976075	1.03138	1.00814
29160339	exoglucanase	Botryosphaeria rhodina	Carbon Cycling	Carbon degradation	Cellulose	superkingdom:Eukaryota;kingdom:Fungi;phylum:Ascomycota;class:Dothideomycetes;order:Botryosphaeriales;family:Botryosphaeriaceae;genus:Botryosphaeria;	1.00934	0.992903	0.99709	0.944194	0.976831	1.03835	0.961367	0.860172	1.01296
154449709	exoglucanase	Fusicoccum sp. BCC4124	Carbon Cycling	Carbon degradation	Cellulose	superkingdom:Eukaryota;kingdom:Fungi;phylum:Ascomycota;class:Dothideomycetes;order:Botryosphaeriales;family:Botryosphaeriaceae;genus:Fusicoccum;	0.921257	0.947432	0.954326	1.03366	0.937376	0.994811	0.938378	0.990874	1.00967
6179889	exoglucanase	Alternaria alternata	Carbon Cycling	Carbon degradation	Cellulose	superkingdom:Eukaryota;kingdom:Fungi;phylum:Ascomycota;class:Dothideomycetes;order:Pleosporales;family:Pleosporaceae;genus:Alternaria;	0.861973	0.823633	0.817483	0.841512	0.836297	0.868319	0.823413	NA	0.875057
23429039	exoglucanase	Cochliobolus heterostrophus	Carbon Cycling	Carbon degradation	Cellulose	superkingdom:Eukaryota;kingdom:Fungi;phylum:Ascomycota;class:Dothideomycetes;order:Pleosporales;family:Pleosporaceae;genus:Cochliobolus;	1.10726	1.12347	1.10299	1.24225	1.13706	1.16683	1.05581	1.165	1.13409
189193473	exoglucanase	Pyrenophora tritici-repentis Pt-1C-BFP	Carbon Cycling	Carbon degradation	Cellulose	superkingdom:Eukaryota;kingdom:Fungi;phylum:Ascomycota;class:Dothideomycetes;order:Pleosporales;family:Pleosporaceae;genus:Pyrenophora;species:Pyrenophora tritici-repentis;	1.08087	1.06901	1.05621	0.961455	1.08713	1.0588	1.09863	1.07095	1.09831
189206069	exoglucanase	Pyrenophora tritici-repentis Pt-1C-BFP	Carbon Cycling	Carbon degradation	Cellulose	superkingdom:Eukaryota;kingdom:Fungi;phylum:Ascomycota;class:Dothideomycetes;order:Pleosporales;family:Pleosporaceae;genus:Pyrenophora;species:Pyrenophora tritici-repentis;	0.907726	NA	0.852938	0.721427	0.800461	NA	0.859977	NA	0.774081
189190568	exoglucanase	Pyrenophora tritici-repentis Pt-1C-BFP	Carbon Cycling	Carbon degradation	Cellulose	superkingdom:Eukaryota;kingdom:Fungi;phylum:Ascomycota;class:Dothideomycetes;order:Pleosporales;family:Pleosporaceae;genus:Pyrenophora;species:Pyrenophora tritici-repentis;	0.888275	0.784696	0.815565	0.739426	0.901254	0.828498	0.903099	0.777358	0.846162
50837698b	exoglucanase	Aspergillus tubingensis	Carbon Cycling	Carbon degradation	Cellulose	superkingdom:Eukaryota;kingdom:Fungi;phylum:Ascomycota;class:Eurotiomycetes;order:Eurotiales;family:Trichocomaceae;genus:Aspergillus;	1.20066	1.19662	1.22368	1.24611	1.17613	1.2438	1.20408	1.20312	1.2393
2970042	exoglucanase	Aspergillus aculeatus	Carbon Cycling	Carbon degradation	Cellulose	superkingdom:Eukaryota;kingdom:Fungi;phylum:Ascomycota;class:Eurotiomycetes;order:Eurotiales;family:Trichocomaceae;genus:Aspergillus;	1.04572	1.0636	1.07854	1.03651	1.04656	1.03771	1.03241	1.08291	1.01484
58221589	exoglucanase	Aspergillus terreus	Carbon Cycling	Carbon degradation	Cellulose	superkingdom:Eukaryota;kingdom:Fungi;phylum:Ascomycota;class:Eurotiomycetes;order:Eurotiales;family:Trichocomaceae;genus:Aspergillus;	0.917341	0.828807	0.826643	0.736077	0.941638	0.7473	0.857649	0.821472	0.789584
283362016	exoglucanase	Aspergillus oryzae	Carbon Cycling	Carbon degradation	Cellulose	superkingdom:Eukaryota;kingdom:Fungi;phylum:Ascomycota;class:Eurotiomycetes;order:Eurotiales;family:Trichocomaceae;genus:Aspergillus;	1.11116	1.14483	1.15426	1.25103	1.12757	1.18007	1.11117	1.15139	1.15809
134076503	exoglucanase	NA	Carbon Cycling	Carbon degradation	Cellulose	superkingdom:Eukaryota;kingdom:Fungi;phylum:Ascomycota;class:Eurotiomycetes;order:Eurotiales;family:Trichocomaceae;genus:Aspergillus;	1.10109	1.06534	1.09091	1.03858	1.03953	1.14139	1.08643	0.853093	1.11434
308212489	exoglucanase	Aspergillus niger	Carbon Cycling	Carbon degradation	Cellulose	superkingdom:Eukaryota;kingdom:Fungi;phylum:Ascomycota;class:Eurotiomycetes;order:Eurotiales;family:Trichocomaceae;genus:Aspergillus;	0.825348	0.838921	0.816587	0.815761	0.805049	0.821743	0.844443	0.775996	0.834278
121710012a	exoglucanase	Aspergillus clavatus NRRL 1	Carbon Cycling	Carbon degradation	Cellulose	superkingdom:Eukaryota;kingdom:Fungi;phylum:Ascomycota;class:Eurotiomycetes;order:Eurotiales;family:Trichocomaceae;genus:Aspergillus;species:Aspergillus clavatus;	NA	NA	NA	0.761929	NA	0.814707	0.873219	0.814199	0.752761
121712204	exoglucanase	Aspergillus clavatus NRRL 1	Carbon Cycling	Carbon degradation	Cellulose	superkingdom:Eukaryota;kingdom:Fungi;phylum:Ascomycota;class:Eurotiomycetes;order:Eurotiales;family:Trichocomaceae;genus:Aspergillus;species:Aspergillus clavatus;	1.11588	1.07707	1.12596	1.10384	1.10806	1.05746	1.11987	1.05955	1.05
121710012b	exoglucanase	Aspergillus clavatus NRRL 1	Carbon Cycling	Carbon degradation	Cellulose	superkingdom:Eukaryota;kingdom:Fungi;phylum:Ascomycota;class:Eurotiomycetes;order:Eurotiales;family:Trichocomaceae;genus:Aspergillus;species:Aspergillus clavatus;	NA	0.804678	0.844054	0.852292	0.921429	0.956024	0.763755	NA	0.90656
66846140	exoglucanase	Aspergillus fumigatus Af293	Carbon Cycling	Carbon degradation	Cellulose	superkingdom:Eukaryota;kingdom:Fungi;phylum:Ascomycota;class:Eurotiomycetes;order:Eurotiales;family:Trichocomaceae;genus:Aspergillus;species:Aspergillus fumigatus;	0.899949	0.933397	0.880877	0.929693	0.869042	0.932378	0.889125	0.946232	0.944167
145238722	exoglucanase	NA	Carbon Cycling	Carbon degradation	Cellulose	superkingdom:Eukaryota;kingdom:Fungi;phylum:Ascomycota;class:Eurotiomycetes;order:Eurotiales;family:Trichocomaceae;genus:Aspergillus;species:Aspergillus niger;	1.01483	0.891762	0.993252	0.884149	0.937147	0.986432	1.0268	0.914727	1.08231
115397177	exoglucanase	Aspergillus terreus NIH2624	Carbon Cycling	Carbon degradation	Cellulose	superkingdom:Eukaryota;kingdom:Fungi;phylum:Ascomycota;class:Eurotiomycetes;order:Eurotiales;family:Trichocomaceae;genus:Aspergillus;species:Aspergillus terreus;	1.20541	1.16405	1.17515	1.09789	1.16341	1.17819	1.16969	1.05472	1.19108
115491303	exoglucanase	Aspergillus terreus NIH2624	Carbon Cycling	Carbon degradation	Cellulose	superkingdom:Eukaryota;kingdom:Fungi;phylum:Ascomycota;class:Eurotiomycetes;order:Eurotiales;family:Trichocomaceae;genus:Aspergillus;species:Aspergillus terreus;	0.895081	0.97172	0.933496	1.06564	0.946254	0.982451	0.93277	1.00981	0.958368
115401052	exoglucanase	Aspergillus terreus NIH2624	Carbon Cycling	Carbon degradation	Cellulose	superkingdom:Eukaryota;kingdom:Fungi;phylum:Ascomycota;class:Eurotiomycetes;order:Eurotiales;family:Trichocomaceae;genus:Aspergillus;species:Aspergillus terreus;	0.976571	1.01344	0.936351	1.14695	1.02912	1.06117	0.992846	1.08851	1.07031
115397179	exoglucanase	Aspergillus terreus NIH2624	Carbon Cycling	Carbon degradation	Cellulose	superkingdom:Eukaryota;kingdom:Fungi;phylum:Ascomycota;class:Eurotiomycetes;order:Eurotiales;family:Trichocomaceae;genus:Aspergillus;species:Aspergillus terreus;	1.07097	1.08777	1.09227	1.02376	1.11206	0.992042	1.07873	1.08493	1.0549
259488404	exoglucanase	Aspergillus nidulans FGSC A4	Carbon Cycling	Carbon degradation	Cellulose	superkingdom:Eukaryota;kingdom:Fungi;phylum:Ascomycota;class:Eurotiomycetes;order:Eurotiales;family:Trichocomaceae;genus:Emericella;species:Emericella nidulans;	0.844757	NA	0.864808	0.813831	0.916545	0.772118	0.787546	0.799411	0.835314
70986018	exoglucanase	Aspergillus fumigatus Af293	Carbon Cycling	Carbon degradation	Cellulose	superkingdom:Eukaryota;kingdom:Fungi;phylum:Ascomycota;class:Eurotiomycetes;order:Eurotiales;family:Trichocomaceae;genus:Neosartorya;species:Aspergillus fumigatus;	1.0863	1.12698	1.12146	1.21964	1.09577	1.11504	1.10027	1.20679	1.11378
119468034	exoglucanase	Neosartorya fischeri NRRL 181	Carbon Cycling	Carbon degradation	Cellulose	superkingdom:Eukaryota;kingdom:Fungi;phylum:Ascomycota;class:Eurotiomycetes;order:Eurotiales;family:Trichocomaceae;genus:Neosartorya;species:Neosartorya fischeri;	0.967154	0.967021	0.943761	0.938386	0.874054	0.990304	0.95524	0.928133	0.885452
51243029	exoglucanase	Penicillium occitanis	Carbon Cycling	Carbon degradation	Cellulose	superkingdom:Eukaryota;kingdom:Fungi;phylum:Ascomycota;class:Eurotiomycetes;order:Eurotiales;family:Trichocomaceae;genus:Penicillium;	0.884964	0.841633	0.851555	0.879555	0.909728	0.893137	0.880969	NA	0.920664
211587491	exoglucanase	Penicillium chrysogenum Wisconsin 54-1255	Carbon Cycling	Carbon degradation	Cellulose	superkingdom:Eukaryota;kingdom:Fungi;phylum:Ascomycota;class:Eurotiomycetes;order:Eurotiales;family:Trichocomaceae;genus:Penicillium;species:Penicillium chrysogenum;	0.986711	0.864108	0.907147	0.880297	0.998617	0.993441	0.92486	0.917526	1.00401
211587109	exoglucanase	Penicillium chrysogenum Wisconsin 54-1255	Carbon Cycling	Carbon degradation	Cellulose	superkingdom:Eukaryota;kingdom:Fungi;phylum:Ascomycota;class:Eurotiomycetes;order:Eurotiales;family:Trichocomaceae;genus:Penicillium;species:Penicillium chrysogenum;	1.15448	1.1425	1.15645	1.20511	1.18352	1.17678	1.16395	1.20041	1.17296
212539472a	exoglucanase	Penicillium marneffei ATCC 18224	Carbon Cycling	Carbon degradation	Cellulose	superkingdom:Eukaryota;kingdom:Fungi;phylum:Ascomycota;class:Eurotiomycetes;order:Eurotiales;family:Trichocomaceae;genus:Penicillium;species:Penicillium marneffei;	0.865856	0.83424	0.831895	0.847708	0.873028	0.869348	0.829022	NA	0.870838
21040221a	exoglucanase	Talaromyces emersonii	Carbon Cycling	Carbon degradation	Cellulose	superkingdom:Eukaryota;kingdom:Fungi;phylum:Ascomycota;class:Eurotiomycetes;order:Eurotiales;family:Trichocomaceae;genus:Rasamsonia;	1.27453	1.19661	1.27198	1.25763	1.26518	1.34697	1.20285	1.24843	1.2922
19568104	exoglucanase	Talaromyces emersonii	Carbon Cycling	Carbon degradation	Cellulose	superkingdom:Eukaryota;kingdom:Fungi;phylum:Ascomycota;class:Eurotiomycetes;order:Eurotiales;family:Trichocomaceae;genus:Talaromyces;	1.19646	1.15829	1.16554	1.1889	1.1434	1.23777	1.12145	1.16255	1.17559
21040221b	exoglucanase	Talaromyces emersonii	Carbon Cycling	Carbon degradation	Cellulose	superkingdom:Eukaryota;kingdom:Fungi;phylum:Ascomycota;class:Eurotiomycetes;order:Eurotiales;family:Trichocomaceae;genus:Talaromyces;	0.886177	0.861042	0.936587	0.854443	0.903348	0.973856	0.849485	0.865182	0.89731
50837707	exoglucanase	Malbranchea cinnamomea	Carbon Cycling	Carbon degradation	Cellulose	superkingdom:Eukaryota;kingdom:Fungi;phylum:Ascomycota;class:Eurotiomycetes;order:Onygenales;genus:Malbranchea;	1.03919	1.02024	1.01509	0.981141	1.01491	1.03034	1.03409	0.991086	1.0323
29160367	exoglucanase	Pseudoplectania nigrella	Carbon Cycling	Carbon degradation	Cellulose	superkingdom:Eukaryota;kingdom:Fungi;phylum:Ascomycota;class:Pezizomycetes;order:Pezizales;family:Sarcosomataceae;genus:Pseudoplectania;	0.872728	NA	0.830134	NA	0.840634	0.790989	NA	NA	NA
156838920	exoglucanase	Vanderwaltozyma polyspora DSM 70294	Carbon Cycling	Carbon degradation	Cellulose	superkingdom:Eukaryota;kingdom:Fungi;phylum:Ascomycota;class:Saccharomycetes;order:Saccharomycetales;family:Saccharomycetaceae;genus:Vanderwaltozyma;species:Vanderwaltozyma polyspora;	0.912888	0.852554	0.788513	0.731549	0.976628	0.864494	0.906217	0.895257	0.791288
867688	exoglucanase	Cryphonectria parasitica	Carbon Cycling	Carbon degradation	Cellulose	superkingdom:Eukaryota;kingdom:Fungi;phylum:Ascomycota;class:Sordariomycetes;order:Diaporthales;family:Cryphonectriaceae;genus:Cryphonectria;	0.936585	0.994248	0.975054	1.1283	0.97585	1.00289	0.953824	1.04915	0.992026
270288049	exoglucanase	Stilbella annulata	Carbon Cycling	Carbon degradation	Cellulose	superkingdom:Eukaryota;kingdom:Fungi;phylum:Ascomycota;class:Sordariomycetes;order:Glomerellales;family:Plectosphaerellaceae;genus:Acrostalagmus;	1.24082	1.19054	1.21023	1.18742	1.1727	1.28658	1.23676	1.0135	1.23069
62184245	exoglucanase	Verticillium dahliae	Carbon Cycling	Carbon degradation	Cellulose	superkingdom:Eukaryota;kingdom:Fungi;phylum:Ascomycota;class:Sordariomycetes;order:Glomerellales;family:Plectosphaerellaceae;genus:Verticilium;	1.13211	1.10285	1.13045	1.20237	1.12764	1.17946	1.12504	1.16981	1.14441
302404451a	exoglucanase	Verticillium albo-atrum VaMs.102	Carbon Cycling	Carbon degradation	Cellulose	superkingdom:Eukaryota;kingdom:Fungi;phylum:Ascomycota;class:Sordariomycetes;order:Glomerellales;family:Plectosphaerellaceae;genus:Verticilium;species:Verticillium albo-atrum;	0.969304	0.881693	0.871973	0.844153	0.890502	0.985426	0.974579	0.769249	0.992142
302418426a	exoglucanase	Verticillium albo-atrum VaMs.102	Carbon Cycling	Carbon degradation	Cellulose	superkingdom:Eukaryota;kingdom:Fungi;phylum:Ascomycota;class:Sordariomycetes;order:Glomerellales;family:Plectosphaerellaceae;genus:Verticilium;species:Verticillium albo-atrum;	1.22215	1.19397	1.21454	1.21325	1.14355	1.2195	1.19556	1.13574	1.16219
302412114	exoglucanase	Verticillium albo-atrum VaMs.102	Carbon Cycling	Carbon degradation	Cellulose	superkingdom:Eukaryota;kingdom:Fungi;phylum:Ascomycota;class:Sordariomycetes;order:Glomerellales;family:Plectosphaerellaceae;genus:Verticilium;species:Verticillium albo-atrum;	0.914008	0.899671	0.869203	0.889194	0.839929	0.893225	0.870665	0.909179	0.851013
302405457	exoglucanase	Verticillium albo-atrum VaMs.102	Carbon Cycling	Carbon degradation	Cellulose	superkingdom:Eukaryota;kingdom:Fungi;phylum:Ascomycota;class:Sordariomycetes;order:Glomerellales;family:Plectosphaerellaceae;genus:Verticilium;species:Verticillium albo-atrum;	1.04193	1.04678	1.05835	1.02642	0.981848	1.08106	1.00204	0.988572	1.0507
302404451b	exoglucanase	Verticillium albo-atrum VaMs.102	Carbon Cycling	Carbon degradation	Cellulose	superkingdom:Eukaryota;kingdom:Fungi;phylum:Ascomycota;class:Sordariomycetes;order:Glomerellales;family:Plectosphaerellaceae;genus:Verticillium;species:Verticillium alfalfae;	1.33034	1.35974	1.37536	1.42175	1.3218	1.30902	1.35444	1.35339	1.38837
302418426b	exoglucanase	Verticillium albo-atrum VaMs.102	Carbon Cycling	Carbon degradation	Cellulose	superkingdom:Eukaryota;kingdom:Fungi;phylum:Ascomycota;class:Sordariomycetes;order:Glomerellales;family:Plectosphaerellaceae;genus:Verticillium;species:Verticillium alfalfae;	0.983965	0.990468	0.97917	0.984007	1.00263	1.02721	1.00396	0.97707	1.00451
34582632	exoglucanase	Trichoderma viride	Carbon Cycling	Carbon degradation	Cellulose	superkingdom:Eukaryota;kingdom:Fungi;phylum:Ascomycota;class:Sordariomycetes;order:Hypocreales;family:Hypocreaceae;genus:Hypocrea;	1.42742	1.41938	1.45672	1.51882	1.41545	1.48306	1.44419	1.41525	1.47715
295937	exoglucanase	Trichoderma viride	Carbon Cycling	Carbon degradation	Cellulose	superkingdom:Eukaryota;kingdom:Fungi;phylum:Ascomycota;class:Sordariomycetes;order:Hypocreales;family:Hypocreaceae;genus:Hypocrea;	0.965196	0.92711	0.941911	0.999754	0.947669	1.02613	0.935893	0.909082	0.969381
46241268	exoglucanase	Gibberella avenacea	Carbon Cycling	Carbon degradation	Cellulose	superkingdom:Eukaryota;kingdom:Fungi;phylum:Ascomycota;class:Sordariomycetes;order:Hypocreales;family:Nectriaceae;genus:Gibberella;	1.02923	1.03102	1.01115	1.00621	0.871319	1.03544	1.02557	0.842907	1.02534
46241266	exoglucanase	Nectria haematococca mpVI	Carbon Cycling	Carbon degradation	Cellulose	superkingdom:Eukaryota;kingdom:Fungi;phylum:Ascomycota;class:Sordariomycetes;order:Hypocreales;family:Nectriaceae;genus:Nectria;species:Nectria haematococca;	1.00415	0.968727	1.02175	0.961491	1.09488	0.899807	1.03108	0.955107	0.956057
29160303	exoglucanase	Acremonium thermophilum	Carbon Cycling	Carbon degradation	Cellulose	superkingdom:Eukaryota;kingdom:Fungi;phylum:Ascomycota;class:Sordariomycetes;order:Hypocreales;genus:Acremonium;	1.01622	1.04079	1.01409	1.01564	0.985763	1.02228	1.00955	1.00332	1.02615
37778806	exoglucanase	Fusarium lateritium	Carbon Cycling	Carbon degradation	Cellulose	superkingdom:Eukaryota;kingdom:Fungi;phylum:Ascomycota;class:Sordariomycetes;order:Hypocreales;genus:Fusarium;	0.844344	0.844683	0.815302	0.836374	0.752686	0.884077	0.849106	NA	0.790732
29160313	exoglucanase	Verticillium tenerum	Carbon Cycling	Carbon degradation	Cellulose	superkingdom:Eukaryota;kingdom:Fungi;phylum:Ascomycota;class:Sordariomycetes;order:Hypocreales;genus:Verticillium;	0.950327	1.01062	0.94578	1.09125	0.972946	1.00043	0.893989	0.927924	0.988388
29160305	exoglucanase	Chaetomium thermophilum	Carbon Cycling	Carbon degradation	Cellulose	superkingdom:Eukaryota;kingdom:Fungi;phylum:Ascomycota;class:Sordariomycetes;order:Sordariales;family:Chaetomiaceae;genus:Chaetomium;	0.931485	0.980962	0.954295	0.984237	0.912333	0.961105	0.897199	0.943996	0.970881
29160343	exoglucanase	Corynascus heterothallicus	Carbon Cycling	Carbon degradation	Cellulose	superkingdom:Eukaryota;kingdom:Fungi;phylum:Ascomycota;class:Sordariomycetes;order:Sordariales;family:Chaetomiaceae;genus:Thielavia;	1.03379	1.07601	1.07799	1.17168	1.05835	1.05754	1.04857	1.11914	1.07123
29160311	exoglucanase	Thielavia australiensis	Carbon Cycling	Carbon degradation	Cellulose	superkingdom:Eukaryota;kingdom:Fungi;phylum:Ascomycota;class:Sordariomycetes;order:Sordariales;family:Chaetomiaceae;genus:Thielavia;	1.04148	1.08965	1.07517	1.07986	1.06849	1.05164	1.07901	0.998181	1.08862
85108032	exoglucanase	Neurospora crassa OR74A	Carbon Cycling	Carbon degradation	Cellulose	superkingdom:Eukaryota;kingdom:Fungi;phylum:Ascomycota;class:Sordariomycetes;order:Sordariales;family:Sordariaceae;genus:Neurospora;species:Neurospora crassa;	1.05794	1.04485	0.955059	1.01985	1.03009	1.02197	1.07292	0.978354	1.08698
85080647a	exoglucanase	Neurospora crassa OR74A	Carbon Cycling	Carbon degradation	Cellulose	superkingdom:Eukaryota;kingdom:Fungi;phylum:Ascomycota;class:Sordariomycetes;order:Sordariales;family:Sordariaceae;genus:Neurospora;species:Neurospora crassa;	0.975311	0.983953	0.985761	0.919085	0.975186	0.965806	0.970021	0.974221	0.909419
85080647b	exoglucanase	Neurospora crassa OR74A	Carbon Cycling	Carbon degradation	Cellulose	superkingdom:Eukaryota;kingdom:Fungi;phylum:Ascomycota;class:Sordariomycetes;order:Sordariales;family:Sordariaceae;genus:Neurospora;species:Neurospora crassa;	1.15483	1.18781	1.19701	1.25303	1.18887	1.11183	1.18747	1.25714	1.20953
164598138	exoglucanase	Xylaria polymorpha	Carbon Cycling	Carbon degradation	Cellulose	superkingdom:Eukaryota;kingdom:Fungi;phylum:Ascomycota;class:Sordariomycetes;order:Xylariales;family:Xylariaceae;genus:Xylaria;	1.02834	0.90726	0.962825	0.92483	1.16528	1.0622	0.999692	0.914647	0.891116
29160345	exoglucanase	Xylaria hypoxylon	Carbon Cycling	Carbon degradation	Cellulose	superkingdom:Eukaryota;kingdom:Fungi;phylum:Ascomycota;class:Sordariomycetes;order:Xylariales;family:Xylariaceae;genus:Xylaria;	0.871376	NA	0.836558	0.805008	0.81928	0.798127	NA	0.848805	0.842316
270288033	exoglucanase	Acremonium sp.	Carbon Cycling	Carbon degradation	Cellulose	superkingdom:Eukaryota;kingdom:Fungi;phylum:Ascomycota;genus:Acremonium;	0.798915	0.878829	0.849748	0.93644	0.81636	0.852535	0.815311	0.855764	0.867432
29160355	exoglucanase	Acremonium sp.	Carbon Cycling	Carbon degradation	Cellulose	superkingdom:Eukaryota;kingdom:Fungi;phylum:Ascomycota;genus:Acremonium;	1.14607	1.12537	1.10864	1.06221	1.19752	1.14334	1.13146	1.06026	1.13787
4883502	exoglucanase	Humicola grisea var. thermoidea	Carbon Cycling	Carbon degradation	Cellulose	superkingdom:Eukaryota;kingdom:Fungi;phylum:Ascomycota;genus:Humicola;species:Humicola grisea;	1.22762	1.22818	1.26421	1.13606	1.22034	1.18319	1.20257	1.23091	1.18658
1679595	exoglucanase	Agaricus bisporus	Carbon Cycling	Carbon degradation	Cellulose	superkingdom:Eukaryota;kingdom:Fungi;phylum:Basidiomycota;class:Agaricomycetes;order:Agaricales;family:Agaricaceae;genus:Agaricus;	0.997314	0.96566	0.936203	0.920944	0.899914	1.03507	0.991024	0.799706	0.992473
164598084	exoglucanase	Clitopilus prunulus	Carbon Cycling	Carbon degradation	Cellulose	superkingdom:Eukaryota;kingdom:Fungi;phylum:Basidiomycota;class:Agaricomycetes;order:Agaricales;family:Entolomataceae;genus:Clitopilus;	0.828805	NA	0.819808	0.771184	0.825891	0.75381	0.810947	NA	0.765396
13506832	exoglucanase	Lentinula edodes	Carbon Cycling	Carbon degradation	Cellulose	superkingdom:Eukaryota;kingdom:Fungi;phylum:Basidiomycota;class:Agaricomycetes;order:Agaricales;family:Marasmiaceae;genus:Lentinula;	0.805287	0.797646	0.83328	0.784347	0.868775	0.765781	NA	NA	NA
238602691	exoglucanase	Moniliophthora perniciosa FA553	Carbon Cycling	Carbon degradation	Cellulose	superkingdom:Eukaryota;kingdom:Fungi;phylum:Basidiomycota;class:Agaricomycetes;order:Agaricales;family:Marasmiaceae;genus:Moniliophthora;species:Moniliophthora perniciosa;	0.937242	0.891227	0.860701	0.870318	0.890728	0.895712	0.965093	NA	0.954917
238572985	exoglucanase	Moniliophthora perniciosa FA553	Carbon Cycling	Carbon degradation	Cellulose	superkingdom:Eukaryota;kingdom:Fungi;phylum:Basidiomycota;class:Agaricomycetes;order:Agaricales;family:Marasmiaceae;genus:Moniliophthora;species:Moniliophthora perniciosa;	0.848475	0.837234	0.807839	0.769995	0.761623	0.880653	0.821831	NA	0.813226
238603839	exoglucanase	Moniliophthora perniciosa FA553	Carbon Cycling	Carbon degradation	Cellulose	superkingdom:Eukaryota;kingdom:Fungi;phylum:Basidiomycota;class:Agaricomycetes;order:Agaricales;family:Marasmiaceae;genus:Moniliophthora;species:Moniliophthora perniciosa;	0.76263	0.756254	0.724216	0.747202	NA	0.7538	NA	NA	NA
238609818	exoglucanase	Moniliophthora perniciosa FA553	Carbon Cycling	Carbon degradation	Cellulose	superkingdom:Eukaryota;kingdom:Fungi;phylum:Basidiomycota;class:Agaricomycetes;order:Agaricales;family:Marasmiaceae;genus:Moniliophthora;species:Moniliophthora perniciosa;	0.977658	0.975334	0.996586	0.969321	0.954956	0.9924	1.00279	0.854553	0.963759
215455339	exoglucanase	Moniliophthora perniciosa FA553	Carbon Cycling	Carbon degradation	Cellulose	superkingdom:Eukaryota;kingdom:Fungi;phylum:Basidiomycota;class:Agaricomycetes;order:Agaricales;family:Marasmiaceae;genus:Moniliophthora;species:Moniliophthora perniciosa;	1.02712	1.14217	1.09265	1.21268	1.06061	1.12934	1.07323	1.1276	1.07515
238592310b	exoglucanase	Moniliophthora perniciosa FA553	Carbon Cycling	Carbon degradation	Cellulose	superkingdom:Eukaryota;kingdom:Fungi;phylum:Basidiomycota;class:Agaricomycetes;order:Agaricales;family:Marasmiaceae;genus:Moniliophthora;species:Moniliophthora perniciosa;	NA	NA	NA	0.833682	0.723743	0.786822	0.764705	NA	0.777486
146350520	exoglucanase	Pleurotus sp. _Florida_	Carbon Cycling	Carbon degradation	Cellulose	superkingdom:Eukaryota;kingdom:Fungi;phylum:Basidiomycota;class:Agaricomycetes;order:Agaricales;family:Pleurotaceae;genus:Pleurotus;species:Pleurotus pulmonarius;	1.14402	1.14938	1.15155	1.10982	1.10342	1.12793	1.10777	1.15501	1.10455
49333365	exoglucanase	Volvariella volvacea	Carbon Cycling	Carbon degradation	Cellulose	superkingdom:Eukaryota;kingdom:Fungi;phylum:Basidiomycota;class:Agaricomycetes;order:Agaricales;family:Pluteaceae;genus:Volvariella;	0.851915	0.855708	0.830882	0.77511	0.926386	0.919239	0.888621	0.813234	0.755038
49333363	exoglucanase	Volvariella volvacea	Carbon Cycling	Carbon degradation	Cellulose	superkingdom:Eukaryota;kingdom:Fungi;phylum:Basidiomycota;class:Agaricomycetes;order:Agaricales;family:Pluteaceae;genus:Volvariella;	1.04188	0.93494	0.902942	0.872711	1.1584	0.993546	0.964512	0.933972	1.06678
49333367	exoglucanase	Volvariella volvacea	Carbon Cycling	Carbon degradation	Cellulose	superkingdom:Eukaryota;kingdom:Fungi;phylum:Basidiomycota;class:Agaricomycetes;order:Agaricales;family:Pluteaceae;genus:Volvariella;	0.902344	0.887426	0.908647	1.00497	0.922259	0.957819	0.902799	0.952269	0.936021
169870197	exoglucanase	Coprinopsis cinerea okayama7_130	Carbon Cycling	Carbon degradation	Cellulose	superkingdom:Eukaryota;kingdom:Fungi;phylum:Basidiomycota;class:Agaricomycetes;order:Agaricales;family:Psathyrellaceae;genus:Coprinopsis;species:Coprinopsis cinerea;	0.93764	0.940907	0.96175	0.943614	0.965204	0.967164	0.96784	0.996409	0.990439
169866037	exoglucanase	Coprinopsis cinerea okayama7_130	Carbon Cycling	Carbon degradation	Cellulose	superkingdom:Eukaryota;kingdom:Fungi;phylum:Basidiomycota;class:Agaricomycetes;order:Agaricales;family:Psathyrellaceae;genus:Coprinopsis;species:Coprinopsis cinerea;	1.06022	1.11732	1.12115	1.02736	1.05068	1.01341	1.07636	1.037	1.03748
299752630a	exoglucanase	Coprinopsis cinerea okayama7_130	Carbon Cycling	Carbon degradation	Cellulose	superkingdom:Eukaryota;kingdom:Fungi;phylum:Basidiomycota;class:Agaricomycetes;order:Agaricales;family:Psathyrellaceae;genus:Coprinopsis;species:Coprinopsis cinerea;	1.02916	1.09516	1.03773	1.12946	1.07697	1.09473	0.939474	1.08096	1.08252
299749838a	exoglucanase	Coprinopsis cinerea okayama7_130	Carbon Cycling	Carbon degradation	Cellulose	superkingdom:Eukaryota;kingdom:Fungi;phylum:Basidiomycota;class:Agaricomycetes;order:Agaricales;family:Psathyrellaceae;genus:Coprinopsis;species:Coprinopsis cinerea;	0.874958	0.844997	0.865273	0.885426	0.883337	0.893654	0.823918	0.789099	0.874811
299749838b	exoglucanase	Coprinopsis cinerea okayama7_130	Carbon Cycling	Carbon degradation	Cellulose	superkingdom:Eukaryota;kingdom:Fungi;phylum:Basidiomycota;class:Agaricomycetes;order:Agaricales;family:Psathyrellaceae;genus:Coprinopsis;species:Coprinopsis cinerea;	1.09071	1.05017	1.07193	0.997953	1.07613	1.03668	1.04278	1.10443	1.02366
299749836a	exoglucanase	Coprinopsis cinerea okayama7_130	Carbon Cycling	Carbon degradation	Cellulose	superkingdom:Eukaryota;kingdom:Fungi;phylum:Basidiomycota;class:Agaricomycetes;order:Agaricales;family:Psathyrellaceae;genus:Coprinopsis;species:Coprinopsis cinerea;	1.05844	1.11748	1.11556	1.10295	0.97403	1.07891	1.09058	1.07677	1.10232
299749838c	exoglucanase	Coprinopsis cinerea okayama7_130	Carbon Cycling	Carbon degradation	Cellulose	superkingdom:Eukaryota;kingdom:Fungi;phylum:Basidiomycota;class:Agaricomycetes;order:Agaricales;family:Psathyrellaceae;genus:Coprinopsis;species:Coprinopsis cinerea;	0.851746	0.834132	0.853776	0.897236	0.821259	0.883534	0.852257	0.893986	0.884697
299752630b	exoglucanase	Coprinopsis cinerea okayama7_130	Carbon Cycling	Carbon degradation	Cellulose	superkingdom:Eukaryota;kingdom:Fungi;phylum:Basidiomycota;class:Agaricomycetes;order:Agaricales;family:Psathyrellaceae;genus:Coprinopsis;species:Coprinopsis cinerea;	0.937988	0.900422	0.885577	0.977476	0.936175	0.969974	0.919508	1.00414	0.951354
169860436	exoglucanase	Coprinopsis cinerea okayama7_130	Carbon Cycling	Carbon degradation	Cellulose	superkingdom:Eukaryota;kingdom:Fungi;phylum:Basidiomycota;class:Agaricomycetes;order:Agaricales;family:Psathyrellaceae;genus:Coprinopsis;species:Coprinopsis cinerea;	0.924873	0.938395	0.926724	0.968264	0.885956	0.990159	0.949464	0.951538	0.961631
299749836b	exoglucanase	Coprinopsis cinerea okayama7_130	Carbon Cycling	Carbon degradation	Cellulose	superkingdom:Eukaryota;kingdom:Fungi;phylum:Basidiomycota;class:Agaricomycetes;order:Agaricales;family:Psathyrellaceae;genus:Coprinopsis;species:Coprinopsis cinerea;	1.02111	1.05261	1.03559	1.07992	0.998838	1.03529	1.03168	1.11554	1.0673
302698659	exoglucanase	Schizophyllum commune H4-8	Carbon Cycling	Carbon degradation	Cellulose	superkingdom:Eukaryota;kingdom:Fungi;phylum:Basidiomycota;class:Agaricomycetes;order:Agaricales;family:Schizophyllaceae;genus:Schizophyllum;species:Schizophyllum commune;	0.929399	0.944341	0.98266	0.873181	1.02194	0.881432	0.957064	0.969074	0.949536
300102959	exoglucanase	Schizophyllum commune H4-8	Carbon Cycling	Carbon degradation	Cellulose	superkingdom:Eukaryota;kingdom:Fungi;phylum:Basidiomycota;class:Agaricomycetes;order:Agaricales;family:Schizophyllaceae;genus:Schizophyllum;species:Schizophyllum commune;	1.2021	1.16726	1.18065	1.21308	1.16089	1.215	1.18373	1.02985	1.21069
164598122	exoglucanase	Clitocybe nuda	Carbon Cycling	Carbon degradation	Cellulose	superkingdom:Eukaryota;kingdom:Fungi;phylum:Basidiomycota;class:Agaricomycetes;order:Agaricales;family:Tricholomataceae;genus:Clitocybe;	0.944964	0.931337	0.946766	0.934149	0.984598	0.968641	0.962502	0.963365	1.00354
164598114	exoglucanase	Clitocybe nuda	Carbon Cycling	Carbon degradation	Cellulose	superkingdom:Eukaryota;kingdom:Fungi;phylum:Basidiomycota;class:Agaricomycetes;order:Agaricales;family:Tricholomataceae;genus:Clitocybe;	1.0417	0.941511	1.00702	1.05309	1.14082	1.11423	1.03829	0.936338	1.07745
164598104	exoglucanase	Infundibulicybe gibba	Carbon Cycling	Carbon degradation	Cellulose	superkingdom:Eukaryota;kingdom:Fungi;phylum:Basidiomycota;class:Agaricomycetes;order:Agaricales;family:Tricholomataceae;genus:Infundibulicybe;	0.992025	0.970067	1.01052	1.01885	0.977444	1.0112	0.992786	0.960582	1.03193
34014589	exoglucanase	Athelia rolfsii	Carbon Cycling	Carbon degradation	Cellulose	superkingdom:Eukaryota;kingdom:Fungi;phylum:Basidiomycota;class:Agaricomycetes;order:Atheliales;family:Atheliaceae;genus:Athelia;	1.0465	0.944635	0.997733	0.856337	1.05854	1.13456	1.05641	0.913691	1.09856
29160347	exoglucanase	Exidia glandulosa	Carbon Cycling	Carbon degradation	Cellulose	superkingdom:Eukaryota;kingdom:Fungi;phylum:Basidiomycota;class:Agaricomycetes;order:Auriculariales;family:Exidiaceae;genus:Exidia;	1.04428	1.069	1.11166	1.11476	1.01294	1.14683	1.05884	1.07349	1.04497
296027	exoglucanase	Phanerochaete chrysosporium	Carbon Cycling	Carbon degradation	Cellulose	superkingdom:Eukaryota;kingdom:Fungi;phylum:Basidiomycota;class:Agaricomycetes;order:Corticiales;family:Corticiaceae;genus:Phanerochaete;	1.00728	0.929635	0.961911	1.01894	1.13965	1.08465	1.01848	0.811233	1.06428
312231	exoglucanase	Phanerochaete chrysosporium	Carbon Cycling	Carbon degradation	Cellulose	superkingdom:Eukaryota;kingdom:Fungi;phylum:Basidiomycota;class:Agaricomycetes;order:Corticiales;family:Corticiaceae;genus:Phanerochaete;	0.973485	0.983071	1.00233	1.06286	1.00355	0.97741	0.987104	1.03262	0.986271
511302	exoglucanase	Phanerochaete chrysosporium	Carbon Cycling	Carbon degradation	Cellulose	superkingdom:Eukaryota;kingdom:Fungi;phylum:Basidiomycota;class:Agaricomycetes;order:Corticiales;family:Corticiaceae;genus:Phanerochaete;	1.10034	1.07907	1.07245	1.04756	1.02583	1.10502	1.03915	0.952158	1.04524
453223	exoglucanase	Phanerochaete chrysosporium	Carbon Cycling	Carbon degradation	Cellulose	superkingdom:Eukaryota;kingdom:Fungi;phylum:Basidiomycota;class:Agaricomycetes;order:Corticiales;family:Corticiaceae;genus:Phanerochaete;	NA	NA	NA	0.701163	0.827697	0.747039	NA	NA	NA
453224	exoglucanase	Phanerochaete chrysosporium	Carbon Cycling	Carbon degradation	Cellulose	superkingdom:Eukaryota;kingdom:Fungi;phylum:Basidiomycota;class:Agaricomycetes;order:Corticiales;family:Corticiaceae;genus:Phanerochaete;	1.0035	0.95044	0.965328	0.942235	0.95629	1.03945	1.01448	0.767218	1.0278
307716520	exoglucanase	Neolentinus lepideus	Carbon Cycling	Carbon degradation	Cellulose	superkingdom:Eukaryota;kingdom:Fungi;phylum:Basidiomycota;class:Agaricomycetes;order:Gloeophyllales;family:Gloeophyllaceae;genus:Neolentinus;	1.04118	1.07812	1.0437	1.06406	1.02445	1.06498	1.03026	1.05802	1.09714
307716518	exoglucanase	Neolentinus lepideus	Carbon Cycling	Carbon degradation	Cellulose	superkingdom:Eukaryota;kingdom:Fungi;phylum:Basidiomycota;class:Agaricomycetes;order:Gloeophyllales;family:Gloeophyllaceae;genus:Neolentinus;	0.871181	0.834213	0.921345	0.942226	1.00524	0.999331	0.801469	0.910137	1.02506
7013021	exoglucanase	Trametes versicolor	Carbon Cycling	Carbon degradation	Cellulose	superkingdom:Eukaryota;kingdom:Fungi;phylum:Basidiomycota;class:Agaricomycetes;order:Polyporales;family:Coriolaceae;genus:Trametes;	1.1716	1.22373	1.23045	1.32457	1.21207	1.20605	1.19207	1.283	1.27027
16304333	exoglucanase	Lentinus sajor-caju	Carbon Cycling	Carbon degradation	Cellulose	superkingdom:Eukaryota;kingdom:Fungi;phylum:Basidiomycota;class:Agaricomycetes;order:Polyporales;family:Lentinaceae;genus:Lentinus;	1.07687	1.11838	1.13571	1.25294	1.09735	1.0789	1.10297	1.17961	1.14084
157362172	exoglucanase	Polyporus arcularius	Carbon Cycling	Carbon degradation	Cellulose	superkingdom:Eukaryota;kingdom:Fungi;phylum:Basidiomycota;class:Agaricomycetes;order:Polyporales;family:Polyporaceae;genus:Polyporus;	0.852186	0.92296	0.935981	0.876534	0.875047	0.878512	0.894971	0.939052	0.889917
157362170	exoglucanase	Polyporus arcularius	Carbon Cycling	Carbon degradation	Cellulose	superkingdom:Eukaryota;kingdom:Fungi;phylum:Basidiomycota;class:Agaricomycetes;order:Polyporales;family:Polyporaceae;genus:Polyporus;	0.981535	1.00435	0.980911	1.09186	0.998801	1.03752	0.956967	1.03864	1.00206
309317871	exoglucanase	Puccinia graminis f. sp. tritici CRL 75-36-700-3	Carbon Cycling	Carbon degradation	Cellulose	superkingdom:Eukaryota;kingdom:Fungi;phylum:Basidiomycota;order:Pucciniales;family:Pucciniaceae;genus:Puccinia;species:Puccinia graminis;	0.823605	0.867466	0.842118	0.915745	0.855907	0.875058	0.856579	0.89383	0.887444
309315519	exoglucanase	Puccinia graminis f. sp. tritici CRL 75-36-700-3	Carbon Cycling	Carbon degradation	Cellulose	superkingdom:Eukaryota;kingdom:Fungi;phylum:Basidiomycota;order:Pucciniales;family:Pucciniaceae;genus:Puccinia;species:Puccinia graminis;	NA	NA	NA	0.876368	0.76316	0.760678	NA	NA	NA
119525323	acetylglucosaminidase	Thermofilum pendens Hrk 5	Carbon Cycling	Carbon degradation	Chitin	superkingdom:Archaea;phylum:Crenarchaeota;class:Thermoprotei;order:Thermoproteales;family:Thermofilaceae;genus:Thermofilum;species:Thermofilum pendens;	1.05397	1.05339	1.06996	1.05873	1.10957	1.05997	1.07356	0.995968	1.10145
257169861	acetylglucosaminidase	Halomicrobium mukohataei DSM 12286	Carbon Cycling	Carbon degradation	Chitin	superkingdom:Archaea;phylum:Euryarchaeota;class:Halobacteria;order:Halobacteriales;family:Halobacteriaceae;genus:Halomicrobium;species:Halomicrobium mukohataei;	0.947558	0.86899	0.916144	0.845828	1.02278	0.988749	0.897483	0.890622	0.933915
364284986	acetylglucosaminidase	uncultured bacterium H2_7	Carbon Cycling	Carbon degradation	Chitin	superkingdom:Bacteria;	0.973899	0.823706	0.948396	0.749517	0.954087	0.779746	0.810681	0.839266	0.824777
92918946	acetylglucosaminidase	uncultured bacterium	Carbon Cycling	Carbon degradation	Chitin	superkingdom:Bacteria;	0.879393	0.924743	0.905918	0.984695	0.881593	0.89819	0.888366	0.949977	0.91593
373459588	acetylglucosaminidase	Caldithrix abyssi DSM 13497	Carbon Cycling	Carbon degradation	Chitin	superkingdom:Bacteria;genus:Caldithrix;species:Caldithrix abyssi;	1.03347	1.05468	1.04797	1.10602	0.977276	1.03935	1.01323	1.05594	1.02251
269791353	acetylglucosaminidase	Thermobaculum terrenum ATCC BAA-798	Carbon Cycling	Carbon degradation	Chitin	superkingdom:Bacteria;genus:Thermobaculum;species:Thermobaculum terrenum;	1.1513	1.00487	1.11548	1.13085	1.19022	1.18286	1.0966	1.04133	1.13382
225871735	acetylglucosaminidase	Acidobacterium capsulatum ATCC 51196	Carbon Cycling	Carbon degradation	Chitin	superkingdom:Bacteria;phylum:Acidobacteria;class:Acidobacteriia;order:Acidobacteriales;family:Acidobacteriaceae;genus:Acidobacterium;species:Acidobacterium capsulatum;	1.18687	1.17391	1.15175	1.17234	1.1263	1.23452	1.13197	1.15968	1.16489
374310679	acetylglucosaminidase	Granulicella mallensis MP5ACTX8	Carbon Cycling	Carbon degradation	Chitin	superkingdom:Bacteria;phylum:Acidobacteria;class:Acidobacteriia;order:Acidobacteriales;family:Acidobacteriaceae;genus:Granulicella;species:Granulicella mallensis;	1.06675	0.977209	0.973105	0.983189	1.00086	1.05428	1.04805	0.827288	1.03137
374311165	acetylglucosaminidase	Granulicella mallensis MP5ACTX8	Carbon Cycling	Carbon degradation	Chitin	superkingdom:Bacteria;phylum:Acidobacteria;class:Acidobacteriia;order:Acidobacteriales;family:Acidobacteriaceae;genus:Granulicella;species:Granulicella mallensis;	0.881415	0.821313	0.776066	0.793573	0.921804	0.837524	0.848435	NA	0.895928
358754972	acetylglucosaminidase	Granulicella mallensis MP5ACTX8	Carbon Cycling	Carbon degradation	Chitin	superkingdom:Bacteria;phylum:Acidobacteria;class:Acidobacteriia;order:Acidobacteriales;family:Acidobacteriaceae;genus:Granulicella;species:Granulicella mallensis;	1.07663	0.959674	1.02061	0.979293	1.09444	1.09016	1.03712	0.971728	1.06885
321165351	acetylglucosaminidase	Granulicella tundricola MP5ACTX9	Carbon Cycling	Carbon degradation	Chitin	superkingdom:Bacteria;phylum:Acidobacteria;class:Acidobacteriia;order:Acidobacteriales;family:Acidobacteriaceae;genus:Granulicella;species:Granulicella tundricola;	1.02089	0.993294	0.995048	0.997722	1.05974	1.04565	1.00771	0.948461	1.03719
321163417	acetylglucosaminidase	Granulicella tundricola MP5ACTX9	Carbon Cycling	Carbon degradation	Chitin	superkingdom:Bacteria;phylum:Acidobacteria;class:Acidobacteriia;order:Acidobacteriales;family:Acidobacteriaceae;genus:Granulicella;species:Granulicella tundricola;	1.28939	1.28872	1.3055	1.33607	1.35148	1.32581	1.29938	1.31906	1.32347
390412458	acetylglucosaminidase	Terriglobus roseus DSM 18391	Carbon Cycling	Carbon degradation	Chitin	superkingdom:Bacteria;phylum:Acidobacteria;class:Acidobacteriia;order:Acidobacteriales;family:Acidobacteriaceae;genus:Terriglobus;species:Terriglobus roseus;	1.10435	1.07287	1.05308	1.05955	1.09584	1.11773	1.09488	0.928764	1.12446
390959590	acetylglucosaminidase	Terriglobus roseus DSM 18391	Carbon Cycling	Carbon degradation	Chitin	superkingdom:Bacteria;phylum:Acidobacteria;class:Acidobacteriia;order:Acidobacteriales;family:Acidobacteriaceae;genus:Terriglobus;species:Terriglobus roseus;	0.993717	1.02279	0.97568	1.12502	1.03439	1.09861	1.02747	1.03111	1.02729
320105585	acetylglucosaminidase	Terriglobus saanensis SP1PR4	Carbon Cycling	Carbon degradation	Chitin	superkingdom:Bacteria;phylum:Acidobacteria;class:Acidobacteriia;order:Acidobacteriales;family:Acidobacteriaceae;genus:Terriglobus;species:Terriglobus saanensis;	1.04672	1.07581	1.09629	1.22844	1.10543	1.12838	1.08642	1.17358	1.14003
319925415	acetylglucosaminidase	Terriglobus saanensis SP1PR4	Carbon Cycling	Carbon degradation	Chitin	superkingdom:Bacteria;phylum:Acidobacteria;class:Acidobacteriia;order:Acidobacteriales;family:Acidobacteriaceae;genus:Terriglobus;species:Terriglobus saanensis;	1.17226	1.1741	1.19326	1.19745	1.22161	1.14088	1.20156	1.12029	1.23065
320106667	acetylglucosaminidase	Terriglobus saanensis SP1PR4	Carbon Cycling	Carbon degradation	Chitin	superkingdom:Bacteria;phylum:Acidobacteria;class:Acidobacteriia;order:Acidobacteriales;family:Acidobacteriaceae;genus:Terriglobus;species:Terriglobus saanensis;	0.987011	0.896944	0.902005	0.938868	0.956955	0.985804	0.95147	NA	1.00097
94551812	acetylglucosaminidase	Candidatus Koribacter versatilis Ellin345	Carbon Cycling	Carbon degradation	Chitin	superkingdom:Bacteria;phylum:Acidobacteria;genus:Candidatus Koribacter;species:Candidatus Koribacter versatilis;	0.882682	0.938351	0.93168	0.990688	0.877127	0.910151	0.898609	0.983584	0.951925
94552570	acetylglucosaminidase	Candidatus Koribacter versatilis Ellin345	Carbon Cycling	Carbon degradation	Chitin	superkingdom:Bacteria;phylum:Acidobacteria;genus:Candidatus Koribacter;species:Candidatus Koribacter versatilis;	0.869996	0.818474	0.840859	0.819031	0.838426	0.875173	0.847794	NA	0.841505
88815118	acetylglucosaminidase	marine actinobacterium PHSC20C1	Carbon Cycling	Carbon degradation	Chitin	superkingdom:Bacteria;phylum:Actinobacteria;class:Actinobacteria;	1.14334	1.14363	1.11382	1.1095	1.06827	1.12946	1.15409	0.83285	1.16263
117647746	acetylglucosaminidase	Acidothermus cellulolyticus 11B	Carbon Cycling	Carbon degradation	Chitin	superkingdom:Bacteria;phylum:Actinobacteria;class:Actinobacteria;order:Actinomycetales;family:Acidothermaceae;genus:Acidothermus;species:Acidothermus cellulolyticus;	1.09288	1.08831	1.10295	1.18741	1.12395	1.12881	1.08499	1.14542	1.07525
227494347	acetylglucosaminidase	Actinomyces coleocanis DSM 15436	Carbon Cycling	Carbon degradation	Chitin	superkingdom:Bacteria;phylum:Actinobacteria;class:Actinobacteria;order:Actinomycetales;family:Actinomycetaceae;genus:Actinomyces;species:Actinomyces coleocanis;	1.1196	1.10262	1.12287	1.17121	1.12315	1.15112	1.14182	1.16432	1.15447
365825509	acetylglucosaminidase	Actinomyces graevenitzii C83	Carbon Cycling	Carbon degradation	Chitin	superkingdom:Bacteria;phylum:Actinobacteria;class:Actinobacteria;order:Actinomycetales;family:Actinomycetaceae;genus:Actinomyces;species:Actinomyces graevenitzii;	0.987077	0.982243	0.989322	1.02564	1.01341	0.999204	1.0141	1.02277	1.02047
365257073	acetylglucosaminidase	Actinomyces graevenitzii C83	Carbon Cycling	Carbon degradation	Chitin	superkingdom:Bacteria;phylum:Actinobacteria;class:Actinobacteria;order:Actinomycetales;family:Actinomycetaceae;genus:Actinomyces;species:Actinomyces graevenitzii;	0.965318	0.910031	0.905975	0.852362	0.972966	0.941185	0.98029	0.769609	0.974178
293189354	acetylglucosaminidase	Actinomyces odontolyticus F0309	Carbon Cycling	Carbon degradation	Chitin	superkingdom:Bacteria;phylum:Actinobacteria;class:Actinobacteria;order:Actinomycetales;family:Actinomycetaceae;genus:Actinomyces;species:Actinomyces odontolyticus;	0.822075	0.797629	0.887007	0.805086	0.855172	0.812917	0.846299	0.842482	0.781448
315312361	acetylglucosaminidase	Actinomyces sp. oral taxon 180 str. F0310	Carbon Cycling	Carbon degradation	Chitin	superkingdom:Bacteria;phylum:Actinobacteria;class:Actinobacteria;order:Actinomycetales;family:Actinomycetaceae;genus:Actinomyces;species:Actinomyces sp. oral taxon 180;	1.15623	1.17527	1.18574	1.17226	1.08958	1.20128	1.177	1.13272	1.15798
226834586	acetylglucosaminidase	Actinomyces urogenitalis DSM 15434	Carbon Cycling	Carbon degradation	Chitin	superkingdom:Bacteria;phylum:Actinobacteria;class:Actinobacteria;order:Actinomycetales;family:Actinomycetaceae;genus:Actinomyces;species:Actinomyces urogenitalis;	1.13142	1.17448	1.15496	1.28995	1.14487	1.16776	1.15232	1.25097	1.2116
227498100	acetylglucosaminidase	Actinomyces urogenitalis DSM 15434	Carbon Cycling	Carbon degradation	Chitin	superkingdom:Bacteria;phylum:Actinobacteria;class:Actinobacteria;order:Actinomycetales;family:Actinomycetaceae;genus:Actinomyces;species:Actinomyces urogenitalis;	1.15412	1.04871	1.071	1.00072	1.16599	1.0652	1.1582	1.02245	1.19568
296931113	acetylglucosaminidase	Arcanobacterium haemolyticum DSM 20595	Carbon Cycling	Carbon degradation	Chitin	superkingdom:Bacteria;phylum:Actinobacteria;class:Actinobacteria;order:Actinomycetales;family:Actinomycetaceae;genus:Arcanobacterium;species:Arcanobacterium haemolyticum;	1.10727	1.07429	1.06862	1.0445	1.12103	1.10664	1.07252	0.873674	1.1137
269933986	acetylglucosaminidase	Mobiluncus mulieris 28-1	Carbon Cycling	Carbon degradation	Chitin	superkingdom:Bacteria;phylum:Actinobacteria;class:Actinobacteria;order:Actinomycetales;family:Actinomycetaceae;genus:Mobiluncus;species:Mobiluncus mulieris;	1.15194	1.17782	1.15759	1.24352	1.15919	1.19075	1.12822	1.15341	1.18253
255919536	acetylglucosaminidase	Actinosynnema mirum DSM 43827	Carbon Cycling	Carbon degradation	Chitin	superkingdom:Bacteria;phylum:Actinobacteria;class:Actinobacteria;order:Actinomycetales;family:Actinosynnemataceae;genus:Actinosynnema;species:Actinosynnema mirum;	1.14976	1.14151	1.16096	1.23744	1.18349	1.20587	1.14521	1.21926	1.19458
229819788	acetylglucosaminidase	Beutenbergia cavernae DSM 12333	Carbon Cycling	Carbon degradation	Chitin	superkingdom:Bacteria;phylum:Actinobacteria;class:Actinobacteria;order:Actinomycetales;family:Beutenbergiaceae;genus:Beutenbergia;species:Beutenbergia cavernae;	1.18015	1.1567	1.18525	1.27481	1.24837	1.25989	1.18798	1.22079	1.1936
256363045	acetylglucosaminidase	Catenulispora acidiphila DSM 44928	Carbon Cycling	Carbon degradation	Chitin	superkingdom:Bacteria;phylum:Actinobacteria;class:Actinobacteria;order:Actinomycetales;family:Catenulisporaceae;genus:Catenulispora;species:Catenulispora acidiphila;	1.05532	0.988549	1.06792	0.969086	1.04411	0.983741	1.06046	1.0094	0.99617
256361016	acetylglucosaminidase	Catenulispora acidiphila DSM 44928	Carbon Cycling	Carbon degradation	Chitin	superkingdom:Bacteria;phylum:Actinobacteria;class:Actinobacteria;order:Actinomycetales;family:Catenulisporaceae;genus:Catenulispora;species:Catenulispora acidiphila;	1.02552	1.03373	1.05719	1.09858	1.05491	1.07129	1.03581	1.09599	1.05513
256362530	acetylglucosaminidase	Catenulispora acidiphila DSM 44928	Carbon Cycling	Carbon degradation	Chitin	superkingdom:Bacteria;phylum:Actinobacteria;class:Actinobacteria;order:Actinomycetales;family:Catenulisporaceae;genus:Catenulispora;species:Catenulispora acidiphila;	1.1253	1.08563	1.09701	1.14851	1.14033	1.14015	1.08923	1.09706	1.05878
256397205	acetylglucosaminidase	Catenulispora acidiphila DSM 44928	Carbon Cycling	Carbon degradation	Chitin	superkingdom:Bacteria;phylum:Actinobacteria;class:Actinobacteria;order:Actinomycetales;family:Catenulisporaceae;genus:Catenulispora;species:Catenulispora acidiphila;	0.997903	1.06028	1.04095	1.11434	1.03055	1.07128	1.01073	1.1077	1.0724
256393948	acetylglucosaminidase	Catenulispora acidiphila DSM 44928	Carbon Cycling	Carbon degradation	Chitin	superkingdom:Bacteria;phylum:Actinobacteria;class:Actinobacteria;order:Actinomycetales;family:Catenulisporaceae;genus:Catenulispora;species:Catenulispora acidiphila;	1.32958	1.32268	1.33399	1.3909	1.34557	1.35867	1.28265	1.23055	1.34921
33320075	acetylglucosaminidase	Cellulomonas fimi	Carbon Cycling	Carbon degradation	Chitin	superkingdom:Bacteria;phylum:Actinobacteria;class:Actinobacteria;order:Actinomycetales;family:Cellulomonadaceae;genus:Cellulomonas;	1.08983	0.981565	0.988179	0.943483	1.12026	1.09514	1.11537	0.979319	1.04341
296020516	acetylglucosaminidase	Cellulomonas flavigena DSM 20109	Carbon Cycling	Carbon degradation	Chitin	superkingdom:Bacteria;phylum:Actinobacteria;class:Actinobacteria;order:Actinomycetales;family:Cellulomonadaceae;genus:Cellulomonas;species:Cellulomonas flavigena;	1.31157	1.18116	1.24327	1.30229	1.38035	1.39787	1.2281	1.21609	1.35424
256560559	acetylglucosaminidase	Brachybacterium faecium DSM 4810	Carbon Cycling	Carbon degradation	Chitin	superkingdom:Bacteria;phylum:Actinobacteria;class:Actinobacteria;order:Actinomycetales;family:Dermabacteraceae;genus:Brachybacterium;species:Brachybacterium faecium;	1.0343	0.903191	0.962418	1.02664	1.08112	1.10548	0.989165	0.987259	1.13901
256558588	acetylglucosaminidase	Brachybacterium faecium DSM 4810	Carbon Cycling	Carbon degradation	Chitin	superkingdom:Bacteria;phylum:Actinobacteria;class:Actinobacteria;order:Actinomycetales;family:Dermabacteraceae;genus:Brachybacterium;species:Brachybacterium faecium;	1.11278	1.07787	1.10883	1.0954	1.07998	1.10981	1.09013	1.10239	1.03683
386772499	acetylglucosaminidase	Brachybacterium paraconglomeratum LC44	Carbon Cycling	Carbon degradation	Chitin	superkingdom:Bacteria;phylum:Actinobacteria;class:Actinobacteria;order:Actinomycetales;family:Dermabacteraceae;genus:Brachybacterium;species:Brachybacterium paraconglomeratum;	0.952516	0.954852	0.81255	0.911188	0.917982	0.976336	0.949668	0.799171	0.991873
158112437a	acetylglucosaminidase	Frankia sp. EAN1pec	Carbon Cycling	Carbon degradation	Chitin	superkingdom:Bacteria;phylum:Actinobacteria;class:Actinobacteria;order:Actinomycetales;family:Frankiaceae;genus:Frankia;	0.906559	0.879131	0.906347	0.961147	0.875925	0.918057	0.878093	0.927842	0.898173
158112437b	acetylglucosaminidase	Frankia sp. EAN1pec	Carbon Cycling	Carbon degradation	Chitin	superkingdom:Bacteria;phylum:Actinobacteria;class:Actinobacteria;order:Actinomycetales;family:Frankiaceae;genus:Frankia;	0.828665	0.800006	0.800722	0.868213	0.825137	0.822327	NA	0.812533	0.804231
291303320	acetylglucosaminidase	Stackebrandtia nassauensis DSM 44728	Carbon Cycling	Carbon degradation	Chitin	superkingdom:Bacteria;phylum:Actinobacteria;class:Actinobacteria;order:Actinomycetales;family:Glycomycetaceae;genus:Stackebrandtia;species:Stackebrandtia nassauensis;	1.08442	1.04662	1.05161	1.08014	1.07128	1.08816	1.07762	0.974957	1.10598
290568106	acetylglucosaminidase	Stackebrandtia nassauensis DSM 44728	Carbon Cycling	Carbon degradation	Chitin	superkingdom:Bacteria;phylum:Actinobacteria;class:Actinobacteria;order:Actinomycetales;family:Glycomycetaceae;genus:Stackebrandtia;species:Stackebrandtia nassauensis;	1.12895	1.11194	1.13714	1.14647	1.11025	1.1658	1.11347	1.07774	1.14919
291300559	acetylglucosaminidase	Stackebrandtia nassauensis DSM 44728	Carbon Cycling	Carbon degradation	Chitin	superkingdom:Bacteria;phylum:Actinobacteria;class:Actinobacteria;order:Actinomycetales;family:Glycomycetaceae;genus:Stackebrandtia;species:Stackebrandtia nassauensis;	0.939502	0.95194	1.01171	0.868823	0.969098	0.891063	0.927964	0.95315	0.985315
84381321	acetylglucosaminidase	Janibacter sp. HTCC2649	Carbon Cycling	Carbon degradation	Chitin	superkingdom:Bacteria;phylum:Actinobacteria;class:Actinobacteria;order:Actinomycetales;family:Intrasporangiaceae;genus:Janibacter;	1.22828	1.25411	1.26185	1.3647	1.24819	1.24751	1.24028	1.32187	1.27312
84381458	acetylglucosaminidase	Janibacter sp. HTCC2649	Carbon Cycling	Carbon degradation	Chitin	superkingdom:Bacteria;phylum:Actinobacteria;class:Actinobacteria;order:Actinomycetales;family:Intrasporangiaceae;genus:Janibacter;	1.18627	1.05393	1.17461	1.01824	1.18678	1.03555	1.12135	1.09671	1.06438
256685013	acetylglucosaminidase	Jonesia denitrificans DSM 20603	Carbon Cycling	Carbon degradation	Chitin	superkingdom:Bacteria;phylum:Actinobacteria;class:Actinobacteria;order:Actinomycetales;family:Jonesiaceae;genus:Jonesia;species:Jonesia denitrificans;	1.13688	1.18676	1.17995	1.20861	1.04634	1.13995	1.1424	1.08892	1.18501
147829157	acetylglucosaminidase	Clavibacter michiganensis subsp. michiganensis NCPPB 382	Carbon Cycling	Carbon degradation	Chitin	superkingdom:Bacteria;phylum:Actinobacteria;class:Actinobacteria;order:Actinomycetales;family:Microbacteriaceae;genus:Clavibacter;species:Clavibacter michiganensis;	1.05484	0.972043	0.969141	0.949794	0.905199	1.05168	1.01777	NA	1.04435
381396659	acetylglucosaminidase	Microbacterium laevaniformans OR221	Carbon Cycling	Carbon degradation	Chitin	superkingdom:Bacteria;phylum:Actinobacteria;class:Actinobacteria;order:Actinomycetales;family:Microbacteriaceae;genus:Microbacterium;species:Microbacterium laevaniformans;	0.85083	0.910305	0.899619	0.954742	0.915727	0.881518	0.899779	0.979443	0.905633
116671436	acetylglucosaminidase	Arthrobacter sp. FB24	Carbon Cycling	Carbon degradation	Chitin	superkingdom:Bacteria;phylum:Actinobacteria;class:Actinobacteria;order:Actinomycetales;family:Micrococcaceae;genus:Arthrobacter;	NA	NA	NA	0.697059	0.779691	NA	NA	NA	NA
220913345	acetylglucosaminidase	Arthrobacter chlorophenolicus A6	Carbon Cycling	Carbon degradation	Chitin	superkingdom:Bacteria;phylum:Actinobacteria;class:Actinobacteria;order:Actinomycetales;family:Micrococcaceae;genus:Arthrobacter;species:Arthrobacter chlorophenolicus;	1.36163	1.37029	1.39746	1.47592	1.41587	1.38848	1.39004	1.43342	1.42962
373253270	acetylglucosaminidase	Nesterenkonia sp. F	Carbon Cycling	Carbon degradation	Chitin	superkingdom:Bacteria;phylum:Actinobacteria;class:Actinobacteria;order:Actinomycetales;family:Micrococcaceae;genus:Nesterenkonia;	0.927603	0.908635	0.940622	0.908372	0.934533	0.940176	0.882082	0.935703	0.838333
162955599	acetylglucosaminidase	Renibacterium salmoninarum ATCC 33209	Carbon Cycling	Carbon degradation	Chitin	superkingdom:Bacteria;phylum:Actinobacteria;class:Actinobacteria;order:Actinomycetales;family:Micrococcaceae;genus:Renibacterium;species:Renibacterium salmoninarum;	0.884268	0.872833	0.857641	0.887562	0.913186	0.907651	0.850831	0.785021	0.916224
383781416	acetylglucosaminidase	Actinoplanes missouriensis 431	Carbon Cycling	Carbon degradation	Chitin	superkingdom:Bacteria;phylum:Actinobacteria;class:Actinobacteria;order:Actinomycetales;family:Micromonosporaceae;genus:Actinoplanes;species:Actinoplanes missouriensis;	0.877685	0.827489	0.919426	0.855173	0.907499	0.803509	0.875044	0.873866	0.871525
383776190	acetylglucosaminidase	Actinoplanes missouriensis 431	Carbon Cycling	Carbon degradation	Chitin	superkingdom:Bacteria;phylum:Actinobacteria;class:Actinobacteria;order:Actinomycetales;family:Micromonosporaceae;genus:Actinoplanes;species:Actinoplanes missouriensis;	1.13589	1.15016	1.18623	1.28665	1.17656	1.20409	1.17833	1.25703	1.21751
157918173	acetylglucosaminidase	Salinispora arenicola CNS-205	Carbon Cycling	Carbon degradation	Chitin	superkingdom:Bacteria;phylum:Actinobacteria;class:Actinobacteria;order:Actinomycetales;family:Micromonosporaceae;genus:Salinispora;species:Salinispora arenicola;	1.039	1.03636	1.01273	1.08271	1.05583	1.05351	1.01594	1.04656	1.06304
325948635	acetylglucosaminidase	Nocardioidaceae bacterium Broad-1	Carbon Cycling	Carbon degradation	Chitin	superkingdom:Bacteria;phylum:Actinobacteria;class:Actinobacteria;order:Actinomycetales;family:Nocardioidaceae;	1.09119	1.04276	1.03396	1.03047	0.962983	1.12239	1.03475	1.01529	1.05423
284031583	acetylglucosaminidase	Kribbella flavida DSM 17836	Carbon Cycling	Carbon degradation	Chitin	superkingdom:Bacteria;phylum:Actinobacteria;class:Actinobacteria;order:Actinomycetales;family:Nocardioidaceae;genus:Kribbella;species:Kribbella flavida;	1.29441	1.22644	1.22251	1.21	1.27698	1.33256	1.25533	1.13716	1.26255
283813245	acetylglucosaminidase	Kribbella flavida DSM 17836	Carbon Cycling	Carbon degradation	Chitin	superkingdom:Bacteria;phylum:Actinobacteria;class:Actinobacteria;order:Actinomycetales;family:Nocardioidaceae;genus:Kribbella;species:Kribbella flavida;	1.12841	1.14295	1.15764	1.17978	1.09412	1.11775	1.11603	1.12569	1.1703
119717607	acetylglucosaminidase	Nocardioides sp. JS614	Carbon Cycling	Carbon degradation	Chitin	superkingdom:Bacteria;phylum:Actinobacteria;class:Actinobacteria;order:Actinomycetales;family:Nocardioidaceae;genus:Nocardioides;	1.0927	1.13419	1.16442	1.17563	1.11628	1.15634	1.15318	1.13507	1.13425
297559557	acetylglucosaminidase	Nocardiopsis dassonvillei subsp. dassonvillei DSM 43111	Carbon Cycling	Carbon degradation	Chitin	superkingdom:Bacteria;phylum:Actinobacteria;class:Actinobacteria;order:Actinomycetales;family:Nocardiopsaceae;genus:Nocardiopsis;species:Nocardiopsis dassonvillei;	1.12365	1.19007	1.17896	1.25809	1.15155	1.1256	1.15079	1.23408	1.17869
269957520	acetylglucosaminidase	Xylanimonas cellulosilytica DSM 15894	Carbon Cycling	Carbon degradation	Chitin	superkingdom:Bacteria;phylum:Actinobacteria;class:Actinobacteria;order:Actinomycetales;family:Promicromonosporaceae;genus:Xylanimonas;species:Xylanimonas cellulosilytica;	1.28421	1.302	1.28436	1.45563	1.28439	1.35333	1.27559	1.36054	1.3374
314971572	acetylglucosaminidase	Propionibacterium acnes HL037PA3	Carbon Cycling	Carbon degradation	Chitin	superkingdom:Bacteria;phylum:Actinobacteria;class:Actinobacteria;order:Actinomycetales;family:Propionibacteriaceae;genus:Propionibacterium;species:Propionibacterium acnes;	1.27008	1.22397	1.19746	1.19586	1.25587	1.24165	1.24441	1.18674	1.23114
340772016	acetylglucosaminidase	Propionibacterium acnes SK182B-JCVI	Carbon Cycling	Carbon degradation	Chitin	superkingdom:Bacteria;phylum:Actinobacteria;class:Actinobacteria;order:Actinomycetales;family:Propionibacteriaceae;genus:Propionibacterium;species:Propionibacterium acnes;	1.34996	1.39994	1.40608	1.42085	1.30478	1.38311	1.46498	1.25434	1.48519
313836067	acetylglucosaminidase	Propionibacterium acnes HL037PA2	Carbon Cycling	Carbon degradation	Chitin	superkingdom:Bacteria;phylum:Actinobacteria;class:Actinobacteria;order:Actinomycetales;family:Propionibacteriaceae;genus:Propionibacterium;species:Propionibacterium acnes;	1.19951	1.15528	1.17744	1.23029	1.21601	1.23173	1.17468	1.10716	1.21365
327331188	acetylglucosaminidase	Propionibacterium acnes HL097PA1	Carbon Cycling	Carbon degradation	Chitin	superkingdom:Bacteria;phylum:Actinobacteria;class:Actinobacteria;order:Actinomycetales;family:Propionibacteriaceae;genus:Propionibacterium;species:Propionibacterium acnes;	0.995002	0.955095	1.01274	0.937046	0.977165	0.922454	0.934351	0.954887	0.937142
350568629	acetylglucosaminidase	Propionibacterium avidum ATCC 25577	Carbon Cycling	Carbon degradation	Chitin	superkingdom:Bacteria;phylum:Actinobacteria;class:Actinobacteria;order:Actinomycetales;family:Propionibacteriaceae;genus:Propionibacterium;species:Propionibacterium avidum;	1.13593	1.18161	1.15438	1.31993	1.13959	1.19729	1.13447	1.24194	1.18709
328905852	acetylglucosaminidase	Propionibacterium humerusii P08	Carbon Cycling	Carbon degradation	Chitin	superkingdom:Bacteria;phylum:Actinobacteria;class:Actinobacteria;order:Actinomycetales;family:Propionibacteriaceae;genus:Propionibacterium;species:Propionibacterium humerusii;	1.07418	0.998307	1.07198	0.945041	1.15872	1.00738	1.01855	0.994565	1.0127
340528433	acetylglucosaminidase	Amycolatopsis mediterranei S699	Carbon Cycling	Carbon degradation	Chitin	superkingdom:Bacteria;phylum:Actinobacteria;class:Actinobacteria;order:Actinomycetales;family:Pseudonocardiaceae;genus:Amycolatopsis;species:Amycolatopsis mediterranei;	1.45263	1.40936	1.4414	1.47953	1.49975	1.49831	1.46879	1.33965	1.47158
340526654	acetylglucosaminidase	Amycolatopsis mediterranei S699	Carbon Cycling	Carbon degradation	Chitin	superkingdom:Bacteria;phylum:Actinobacteria;class:Actinobacteria;order:Actinomycetales;family:Pseudonocardiaceae;genus:Amycolatopsis;species:Amycolatopsis mediterranei;	1.06887	1.06259	1.05541	1.09792	1.09563	1.12102	1.09755	1.01107	1.09255
384523291	acetylglucosaminidase	Saccharomonospora glauca K62	Carbon Cycling	Carbon degradation	Chitin	superkingdom:Bacteria;phylum:Actinobacteria;class:Actinobacteria;order:Actinomycetales;family:Pseudonocardiaceae;genus:Saccharomonospora;species:Saccharomonospora glauca;	1.17636	1.19283	1.19808	1.20894	1.21931	1.17729	1.19796	1.2263	1.21649
256587094	acetylglucosaminidase	Saccharomonospora viridis DSM 43017	Carbon Cycling	Carbon degradation	Chitin	superkingdom:Bacteria;phylum:Actinobacteria;class:Actinobacteria;order:Actinomycetales;family:Pseudonocardiaceae;genus:Saccharomonospora;species:Saccharomonospora viridis;	0.932863	0.849527	0.894495	0.80113	0.958839	0.877025	0.968291	0.813241	0.897361
383830329	acetylglucosaminidase	Saccharomonospora xinjiangensis XJ-54	Carbon Cycling	Carbon degradation	Chitin	superkingdom:Bacteria;phylum:Actinobacteria;class:Actinobacteria;order:Actinomycetales;family:Pseudonocardiaceae;genus:Saccharomonospora;species:Saccharomonospora xinjiangensis;	1.34202	1.30793	1.33984	1.30037	1.36632	1.35526	1.31893	1.10589	1.35689
291005403	acetylglucosaminidase	Saccharopolyspora erythraea NRRL 2338	Carbon Cycling	Carbon degradation	Chitin	superkingdom:Bacteria;phylum:Actinobacteria;class:Actinobacteria;order:Actinomycetales;family:Pseudonocardiaceae;genus:Saccharopolyspora;species:Saccharopolyspora erythraea;	1.17243	1.13678	1.16216	1.07316	1.13767	1.11943	1.12725	1.16008	1.12575
134100386	acetylglucosaminidase	Saccharopolyspora erythraea NRRL 2338	Carbon Cycling	Carbon degradation	Chitin	superkingdom:Bacteria;phylum:Actinobacteria;class:Actinobacteria;order:Actinomycetales;family:Pseudonocardiaceae;genus:Saccharopolyspora;species:Saccharopolyspora erythraea;	1.04173	1.03608	1.03309	1.1723	1.0406	1.07886	1.02179	1.08932	1.06618
348169757	acetylglucosaminidase	Saccharopolyspora spinosa NRRL 18395	Carbon Cycling	Carbon degradation	Chitin	superkingdom:Bacteria;phylum:Actinobacteria;class:Actinobacteria;order:Actinomycetales;family:Pseudonocardiaceae;genus:Saccharopolyspora;species:Saccharopolyspora spinosa;	0.927407	0.944453	0.961172	0.930186	0.898327	0.948623	0.910253	0.92873	0.938519
269095602	acetylglucosaminidase	Sanguibacter keddieii DSM 10542	Carbon Cycling	Carbon degradation	Chitin	superkingdom:Bacteria;phylum:Actinobacteria;class:Actinobacteria;order:Actinomycetales;family:Sanguibacteraceae;genus:Sanguibacter;species:Sanguibacter keddieii;	0.963159	0.874347	0.85567	0.890555	0.953856	0.971583	0.948928	0.835897	1.00203
269794162	acetylglucosaminidase	Sanguibacter keddieii DSM 10542	Carbon Cycling	Carbon degradation	Chitin	superkingdom:Bacteria;phylum:Actinobacteria;class:Actinobacteria;order:Actinomycetales;family:Sanguibacteraceae;genus:Sanguibacter;species:Sanguibacter keddieii;	1.04713	1.04801	1.04522	1.06008	0.992789	1.07242	1.01706	1.03494	1.05604
296181207	acetylglucosaminidase	Segniliparus rotundus DSM 44985	Carbon Cycling	Carbon degradation	Chitin	superkingdom:Bacteria;phylum:Actinobacteria;class:Actinobacteria;order:Actinomycetales;family:Segniliparaceae;genus:Segniliparus;species:Segniliparus rotundus;	0.889806	0.936104	0.935317	0.901137	0.905325	0.944171	0.890153	0.940074	0.930773
311896279	acetylglucosaminidase	Kitasatospora setae KM-6054	Carbon Cycling	Carbon degradation	Chitin	superkingdom:Bacteria;phylum:Actinobacteria;class:Actinobacteria;order:Actinomycetales;family:Streptomycetaceae;genus:Kitasatospora;species:Kitasatospora setae;	1.02954	0.984773	0.997024	0.95856	1.06336	1.0386	1.0098	0.980558	1.06584
294629486	acetylglucosaminidase	Streptomyces sp. e14	Carbon Cycling	Carbon degradation	Chitin	superkingdom:Bacteria;phylum:Actinobacteria;class:Actinobacteria;order:Actinomycetales;family:Streptomycetaceae;genus:Streptomyces;	0.978441	0.940404	0.95203	0.94769	0.962565	0.919582	0.917675	0.969813	0.920988
359149744	acetylglucosaminidase	Streptomyces sp. S4	Carbon Cycling	Carbon degradation	Chitin	superkingdom:Bacteria;phylum:Actinobacteria;class:Actinobacteria;order:Actinomycetales;family:Streptomycetaceae;genus:Streptomyces;	1.37637	1.38763	1.41033	1.37568	1.39399	1.39717	1.40128	1.36263	1.39214
344315623	acetylglucosaminidase	Streptomyces sp. SirexAA-E	Carbon Cycling	Carbon degradation	Chitin	superkingdom:Bacteria;phylum:Actinobacteria;class:Actinobacteria;order:Actinomycetales;family:Streptomycetaceae;genus:Streptomyces;	0.984153	1.03081	1.01151	0.984826	1.02537	1.07833	1.05457	1.04922	1.03131
6681581	acetylglucosaminidase	Streptomyces thermoviolaceus	Carbon Cycling	Carbon degradation	Chitin	superkingdom:Bacteria;phylum:Actinobacteria;class:Actinobacteria;order:Actinomycetales;family:Streptomycetaceae;genus:Streptomyces;	1.1159	1.15129	1.15851	1.27873	1.1525	1.17773	1.15094	1.24336	1.21498
295827512	acetylglucosaminidase	Streptomyces sp. SPB74	Carbon Cycling	Carbon degradation	Chitin	superkingdom:Bacteria;phylum:Actinobacteria;class:Actinobacteria;order:Actinomycetales;family:Streptomycetaceae;genus:Streptomyces;	1.4768	1.50312	1.50991	1.64738	1.5057	1.52698	1.50408	1.55374	1.55679
364003317	acetylglucosaminidase	Streptomyces sp. W007	Carbon Cycling	Carbon degradation	Chitin	superkingdom:Bacteria;phylum:Actinobacteria;class:Actinobacteria;order:Actinomycetales;family:Streptomycetaceae;genus:Streptomyces;	0.786886	0.828685	0.836757	0.878749	0.835942	0.843607	0.800909	NA	0.826483
333028767	acetylglucosaminidase	Streptomyces sp. Tu6071	Carbon Cycling	Carbon degradation	Chitin	superkingdom:Bacteria;phylum:Actinobacteria;class:Actinobacteria;order:Actinomycetales;family:Streptomycetaceae;genus:Streptomyces;	1.03705	0.996031	0.993507	1.04668	1.0272	1.0501	1.03052	0.958919	1.04127
302534534	acetylglucosaminidase	Streptomyces sp. C	Carbon Cycling	Carbon degradation	Chitin	superkingdom:Bacteria;phylum:Actinobacteria;class:Actinobacteria;order:Actinomycetales;family:Streptomycetaceae;genus:Streptomyces;	1.02791	0.990673	1.00054	1.1317	1.09975	1.10468	1.02844	0.972483	1.06635
256668779	acetylglucosaminidase	Streptomyces sp. AA4	Carbon Cycling	Carbon degradation	Chitin	superkingdom:Bacteria;phylum:Actinobacteria;class:Actinobacteria;order:Actinomycetales;family:Streptomycetaceae;genus:Streptomyces;	1.04088	0.902248	1.05012	0.882051	1.0385	0.945523	0.933514	0.896363	0.878194
344315439	acetylglucosaminidase	Streptomyces sp. SirexAA-E	Carbon Cycling	Carbon degradation	Chitin	superkingdom:Bacteria;phylum:Actinobacteria;class:Actinobacteria;order:Actinomycetales;family:Streptomycetaceae;genus:Streptomyces;	0.929585	0.955761	0.936268	1.07737	0.96016	0.964654	0.96408	1.05219	0.999844
344315293	acetylglucosaminidase	Streptomyces sp. SirexAA-E	Carbon Cycling	Carbon degradation	Chitin	superkingdom:Bacteria;phylum:Actinobacteria;class:Actinobacteria;order:Actinomycetales;family:Streptomycetaceae;genus:Streptomyces;	1.25859	1.21544	1.20539	1.17772	1.13468	1.26318	1.22193	1.01938	1.27007
118442823	acetylglucosaminidase	Streptomyces thermoviolaceus	Carbon Cycling	Carbon degradation	Chitin	superkingdom:Bacteria;phylum:Actinobacteria;class:Actinobacteria;order:Actinomycetales;family:Streptomycetaceae;genus:Streptomyces;	0.9759	0.920307	1.07522	0.997489	1.05282	0.946886	0.978419	0.916237	0.92919
332748619	acetylglucosaminidase	Streptomyces sp. Tu6071	Carbon Cycling	Carbon degradation	Chitin	superkingdom:Bacteria;phylum:Actinobacteria;class:Actinobacteria;order:Actinomycetales;family:Streptomycetaceae;genus:Streptomyces;	1.40933	1.40771	1.41497	1.38341	1.45977	1.38148	1.41603	1.15697	1.44685
30725044	acetylglucosaminidase	Streptomyces thermoviolaceus	Carbon Cycling	Carbon degradation	Chitin	superkingdom:Bacteria;phylum:Actinobacteria;class:Actinobacteria;order:Actinomycetales;family:Streptomycetaceae;genus:Streptomyces;	0.87173	0.83633	0.836964	0.865215	0.860694	0.943165	0.869367	NA	0.902786
256672287	acetylglucosaminidase	Streptomyces sp. AA4	Carbon Cycling	Carbon degradation	Chitin	superkingdom:Bacteria;phylum:Actinobacteria;class:Actinobacteria;order:Actinomycetales;family:Streptomycetaceae;genus:Streptomyces;	0.809672	0.773958	0.796267	0.898268	0.828961	0.814017	0.775259	0.874368	0.840436
4096812	acetylglucosaminidase	Streptomyces sp.	Carbon Cycling	Carbon degradation	Chitin	superkingdom:Bacteria;phylum:Actinobacteria;class:Actinobacteria;order:Actinomycetales;family:Streptomycetaceae;genus:Streptomyces;	0.927054	0.853646	0.904135	0.759777	1.00777	0.893613	0.814687	0.833804	0.890356
256675909	acetylglucosaminidase	Streptomyces sp. SPB78	Carbon Cycling	Carbon degradation	Chitin	superkingdom:Bacteria;phylum:Actinobacteria;class:Actinobacteria;order:Actinomycetales;family:Streptomycetaceae;genus:Streptomyces;	0.984688	0.978667	0.987182	0.937094	0.952247	0.949625	0.934472	1.01136	0.957138
239981946	acetylglucosaminidase	Streptomyces albus J1074	Carbon Cycling	Carbon degradation	Chitin	superkingdom:Bacteria;phylum:Actinobacteria;class:Actinobacteria;order:Actinomycetales;family:Streptomycetaceae;genus:Streptomyces;species:Streptomyces albus;	1.11857	1.14057	1.13524	1.1667	1.07718	1.06617	1.10909	1.13091	1.15315
117164684	acetylglucosaminidase	Streptomyces ambofaciens ATCC 23877	Carbon Cycling	Carbon degradation	Chitin	superkingdom:Bacteria;phylum:Actinobacteria;class:Actinobacteria;order:Actinomycetales;family:Streptomycetaceae;genus:Streptomyces;species:Streptomyces ambofaciens;	1.06314	1.01941	1.0843	1.00531	1.07526	1.04194	1.00358	1.0026	1.08295
297159976	acetylglucosaminidase	Streptomyces bingchenggensis BCW-1	Carbon Cycling	Carbon degradation	Chitin	superkingdom:Bacteria;phylum:Actinobacteria;class:Actinobacteria;order:Actinomycetales;family:Streptomycetaceae;genus:Streptomyces;species:Streptomyces bingchenggensis;	1.34685	1.32767	1.33461	1.33424	1.3086	1.29608	1.31887	1.33534	1.37172
374987461	acetylglucosaminidase	Streptomyces bingchenggensis BCW-1	Carbon Cycling	Carbon degradation	Chitin	superkingdom:Bacteria;phylum:Actinobacteria;class:Actinobacteria;order:Actinomycetales;family:Streptomycetaceae;genus:Streptomyces;species:Streptomyces bingchenggensis;	1.29314	1.23477	1.26262	1.27006	1.263	1.28665	1.22061	1.23298	1.1984
357399566	acetylglucosaminidase	Streptomyces cattleya NRRL 8057 = DSM 46488	Carbon Cycling	Carbon degradation	Chitin	superkingdom:Bacteria;phylum:Actinobacteria;class:Actinobacteria;order:Actinomycetales;family:Streptomycetaceae;genus:Streptomyces;species:Streptomyces cattleya;	1.32906	1.26145	1.25973	1.2605	1.2527	1.24027	1.24858	1.30024	1.23124
371546220	acetylglucosaminidase	Streptomyces coelicoflavus ZG0656	Carbon Cycling	Carbon degradation	Chitin	superkingdom:Bacteria;phylum:Actinobacteria;class:Actinobacteria;order:Actinomycetales;family:Streptomycetaceae;genus:Streptomyces;species:Streptomyces coelicoflavus;	0.996457	0.999583	0.992099	1.00719	0.965347	1.06604	1.0019	0.994623	0.990678
371544272	acetylglucosaminidase	Streptomyces coelicoflavus ZG0656	Carbon Cycling	Carbon degradation	Chitin	superkingdom:Bacteria;phylum:Actinobacteria;class:Actinobacteria;order:Actinomycetales;family:Streptomycetaceae;genus:Streptomyces;species:Streptomyces coelicoflavus;	1.29484	1.3123	1.32181	1.33001	1.24034	1.33415	1.36325	1.22165	1.29753
21224618	acetylglucosaminidase	Streptomyces coelicolor A3(2)	Carbon Cycling	Carbon degradation	Chitin	superkingdom:Bacteria;phylum:Actinobacteria;class:Actinobacteria;order:Actinomycetales;family:Streptomycetaceae;genus:Streptomyces;species:Streptomyces coelicolor;	1.25153	1.29077	1.28001	1.26643	1.21819	1.24663	1.27851	1.26282	1.29067
7544050	acetylglucosaminidase	Streptomyces coelicolor A3(2)	Carbon Cycling	Carbon degradation	Chitin	superkingdom:Bacteria;phylum:Actinobacteria;class:Actinobacteria;order:Actinomycetales;family:Streptomycetaceae;genus:Streptomyces;species:Streptomyces coelicolor;	0.730173	NA	0.755037	0.743722	0.754361	0.753682	NA	NA	NA
6911973	acetylglucosaminidase	Streptomyces coelicolor A3(2)	Carbon Cycling	Carbon degradation	Chitin	superkingdom:Bacteria;phylum:Actinobacteria;class:Actinobacteria;order:Actinomycetales;family:Streptomycetaceae;genus:Streptomyces;species:Streptomyces coelicolor;	1.20693	1.15775	1.19725	1.13211	1.22193	1.14088	1.15973	1.19858	1.15616
239988087	acetylglucosaminidase	Streptomyces roseosporus NRRL 11379	Carbon Cycling	Carbon degradation	Chitin	superkingdom:Bacteria;phylum:Actinobacteria;class:Actinobacteria;order:Actinomycetales;family:Streptomycetaceae;genus:Streptomyces;species:Streptomyces filamentosus;	1.39582	1.30141	1.38485	1.25739	1.51166	1.39258	1.31343	1.26997	1.33357
239991742	acetylglucosaminidase	Streptomyces roseosporus NRRL 11379	Carbon Cycling	Carbon degradation	Chitin	superkingdom:Bacteria;phylum:Actinobacteria;class:Actinobacteria;order:Actinomycetales;family:Streptomycetaceae;genus:Streptomyces;species:Streptomyces filamentosus;	0.825913	0.817225	0.839222	0.856154	0.883078	0.851613	0.891487	0.804006	0.84237
260087185	acetylglucosaminidase	Streptomyces flavogriseus ATCC 33331	Carbon Cycling	Carbon degradation	Chitin	superkingdom:Bacteria;phylum:Actinobacteria;class:Actinobacteria;order:Actinomycetales;family:Streptomycetaceae;genus:Streptomyces;species:Streptomyces flavogriseus;	0.874695	0.824878	0.958311	0.81447	0.899558	0.894933	0.821091	0.855277	0.921445
260088754	acetylglucosaminidase	Streptomyces flavogriseus ATCC 33331	Carbon Cycling	Carbon degradation	Chitin	superkingdom:Bacteria;phylum:Actinobacteria;class:Actinobacteria;order:Actinomycetales;family:Streptomycetaceae;genus:Streptomyces;species:Streptomyces flavogriseus;	0.968328	0.952407	0.99886	0.90374	1.01699	0.924989	0.94221	0.986841	0.916276
260089470	acetylglucosaminidase	Streptomyces flavogriseus ATCC 33331	Carbon Cycling	Carbon degradation	Chitin	superkingdom:Bacteria;phylum:Actinobacteria;class:Actinobacteria;order:Actinomycetales;family:Streptomycetaceae;genus:Streptomyces;species:Streptomyces flavogriseus;	0.982247	0.961289	1.00079	0.962926	0.97842	0.986702	0.967717	1.04087	0.979971
260089370	acetylglucosaminidase	Streptomyces flavogriseus ATCC 33331	Carbon Cycling	Carbon degradation	Chitin	superkingdom:Bacteria;phylum:Actinobacteria;class:Actinobacteria;order:Actinomycetales;family:Streptomycetaceae;genus:Streptomyces;species:Streptomyces flavogriseus;	1.2517	1.16347	1.25153	1.17929	1.33237	1.18831	1.21809	1.20677	1.23973
320008038	acetylglucosaminidase	Streptomyces flavogriseus ATCC 33331	Carbon Cycling	Carbon degradation	Chitin	superkingdom:Bacteria;phylum:Actinobacteria;class:Actinobacteria;order:Actinomycetales;family:Streptomycetaceae;genus:Streptomyces;species:Streptomyces flavogriseus;	1.12007	0.967736	0.914427	1.10359	0.982651	1.10762	1.13567	0.930641	1.1878
329937483	acetylglucosaminidase	Streptomyces griseoaurantiacus M045	Carbon Cycling	Carbon degradation	Chitin	superkingdom:Bacteria;phylum:Actinobacteria;class:Actinobacteria;order:Actinomycetales;family:Streptomycetaceae;genus:Streptomyces;species:Streptomyces griseoaurantiacus;	1.2806	1.13885	1.15124	1.13647	1.17144	1.23336	1.25959	1.15523	1.31117
302478241	acetylglucosaminidase	Streptomyces griseoflavus Tu4000	Carbon Cycling	Carbon degradation	Chitin	superkingdom:Bacteria;phylum:Actinobacteria;class:Actinobacteria;order:Actinomycetales;family:Streptomycetaceae;genus:Streptomyces;species:Streptomyces griseoflavus;	1.20897	1.13515	1.14533	1.15893	1.28817	1.21259	1.19421	1.16206	1.21221
182435112	acetylglucosaminidase	Streptomyces griseus subsp. griseus NBRC 13350	Carbon Cycling	Carbon degradation	Chitin	superkingdom:Bacteria;phylum:Actinobacteria;class:Actinobacteria;order:Actinomycetales;family:Streptomycetaceae;genus:Streptomyces;species:Streptomyces griseus;	1.29367	1.29891	1.31805	1.32295	1.25121	1.3208	1.31985	1.2369	1.30142
297194339	acetylglucosaminidase	Streptomyces pristinaespiralis ATCC 25486	Carbon Cycling	Carbon degradation	Chitin	superkingdom:Bacteria;phylum:Actinobacteria;class:Actinobacteria;order:Actinomycetales;family:Streptomycetaceae;genus:Streptomyces;species:Streptomyces pristinaespiralis;	0.878356	0.806653	0.937461	0.753538	0.980119	0.749073	0.852086	0.789423	0.874398
260649700	acetylglucosaminidase	Streptomyces scabiei 87.22	Carbon Cycling	Carbon degradation	Chitin	superkingdom:Bacteria;phylum:Actinobacteria;class:Actinobacteria;order:Actinomycetales;family:Streptomycetaceae;genus:Streptomyces;species:Streptomyces scabiei;	1.14851	1.1424	1.15741	1.22153	1.18205	1.17624	1.16415	1.1245	1.19471
297204046	acetylglucosaminidase	Streptomyces sviceus ATCC 29083	Carbon Cycling	Carbon degradation	Chitin	superkingdom:Bacteria;phylum:Actinobacteria;class:Actinobacteria;order:Actinomycetales;family:Streptomycetaceae;genus:Streptomyces;species:Streptomyces sviceus;	1.06461	1.11799	1.07031	1.17292	1.08258	1.11597	1.06336	1.14598	1.11011
385666296	acetylglucosaminidase	Streptomyces tsukubaensis NRRL18488	Carbon Cycling	Carbon degradation	Chitin	superkingdom:Bacteria;phylum:Actinobacteria;class:Actinobacteria;order:Actinomycetales;family:Streptomycetaceae;genus:Streptomyces;species:Streptomyces tsukubaensis;	0.91814	0.894279	0.901795	0.867059	0.875284	0.919097	0.874536	0.947524	0.937199
328882621	acetylglucosaminidase	Streptomyces venezuelae ATCC 10712	Carbon Cycling	Carbon degradation	Chitin	superkingdom:Bacteria;phylum:Actinobacteria;class:Actinobacteria;order:Actinomycetales;family:Streptomycetaceae;genus:Streptomyces;species:Streptomyces venezuelae;	0.91257	0.916516	0.941408	0.857102	0.887767	0.876781	0.876238	0.976531	0.852121
344039014	acetylglucosaminidase	Streptomyces violaceusniger Tu 4113	Carbon Cycling	Carbon degradation	Chitin	superkingdom:Bacteria;phylum:Actinobacteria;class:Actinobacteria;order:Actinomycetales;family:Streptomycetaceae;genus:Streptomyces;species:Streptomyces violaceusniger;	1.53276	1.53823	1.54705	1.56546	1.52588	1.5686	1.53502	1.461	1.54008
345015847	acetylglucosaminidase	Streptomyces violaceusniger Tu 4113	Carbon Cycling	Carbon degradation	Chitin	superkingdom:Bacteria;phylum:Actinobacteria;class:Actinobacteria;order:Actinomycetales;family:Streptomycetaceae;genus:Streptomyces;species:Streptomyces violaceusniger;	0.844088	0.852289	0.864188	0.869854	0.884583	0.840393	0.858721	0.775453	0.889438
344041897	acetylglucosaminidase	Streptomyces violaceusniger Tu 4113	Carbon Cycling	Carbon degradation	Chitin	superkingdom:Bacteria;phylum:Actinobacteria;class:Actinobacteria;order:Actinomycetales;family:Streptomycetaceae;genus:Streptomyces;species:Streptomyces violaceusniger;	1.20502	1.20234	1.25456	1.29742	1.19133	1.23909	1.22084	1.2214	1.24731
345015320	acetylglucosaminidase	Streptomyces violaceusniger Tu 4113	Carbon Cycling	Carbon degradation	Chitin	superkingdom:Bacteria;phylum:Actinobacteria;class:Actinobacteria;order:Actinomycetales;family:Streptomycetaceae;genus:Streptomyces;species:Streptomyces violaceusniger;	1.31413	1.20415	1.17698	1.21904	1.26911	1.32698	1.23993	1.08873	1.26463
256802209	acetylglucosaminidase	Streptomyces viridochromogenes DSM 40736	Carbon Cycling	Carbon degradation	Chitin	superkingdom:Bacteria;phylum:Actinobacteria;class:Actinobacteria;order:Actinomycetales;family:Streptomycetaceae;genus:Streptomyces;species:Streptomyces viridochromogenes;	0.815012	NA	0.852212	NA	NA	NA	NA	NA	NA
345633978	acetylglucosaminidase	Streptomyces zinciresistens K42	Carbon Cycling	Carbon degradation	Chitin	superkingdom:Bacteria;phylum:Actinobacteria;class:Actinobacteria;order:Actinomycetales;family:Streptomycetaceae;genus:Streptomyces;species:Streptomyces zinciresistens;	1.16516	1.09596	1.22091	1.07987	1.32289	1.05655	1.19455	1.10952	1.1949
271966336	acetylglucosaminidase	Streptosporangium roseum DSM 43021	Carbon Cycling	Carbon degradation	Chitin	superkingdom:Bacteria;phylum:Actinobacteria;class:Actinobacteria;order:Actinomycetales;family:Streptosporangiaceae;genus:Streptosporangium;species:Streptosporangium roseum;	1.18524	1.20624	1.21441	1.24211	1.18002	1.27007	1.21278	1.20415	1.22211
270513439	acetylglucosaminidase	Streptosporangium roseum DSM 43021	Carbon Cycling	Carbon degradation	Chitin	superkingdom:Bacteria;phylum:Actinobacteria;class:Actinobacteria;order:Actinomycetales;family:Streptosporangiaceae;genus:Streptosporangium;species:Streptosporangium roseum;	0.850573	0.891818	0.88133	1.00423	0.86179	0.918296	0.842745	0.95654	0.879503
271968939	acetylglucosaminidase	Streptosporangium roseum DSM 43021	Carbon Cycling	Carbon degradation	Chitin	superkingdom:Bacteria;phylum:Actinobacteria;class:Actinobacteria;order:Actinomycetales;family:Streptosporangiaceae;genus:Streptosporangium;species:Streptosporangium roseum;	0.857723	0.855182	0.765199	0.838565	0.892324	0.844379	0.850058	0.827432	0.858403
270513355	acetylglucosaminidase	Streptosporangium roseum DSM 43021	Carbon Cycling	Carbon degradation	Chitin	superkingdom:Bacteria;phylum:Actinobacteria;class:Actinobacteria;order:Actinomycetales;family:Streptosporangiaceae;genus:Streptosporangium;species:Streptosporangium roseum;	1.29243	1.28027	1.29369	1.29572	1.32784	1.30618	1.27936	1.26152	1.25822
271964557	acetylglucosaminidase	Streptosporangium roseum DSM 43021	Carbon Cycling	Carbon degradation	Chitin	superkingdom:Bacteria;phylum:Actinobacteria;class:Actinobacteria;order:Actinomycetales;family:Streptosporangiaceae;genus:Streptosporangium;species:Streptosporangium roseum;	0.973675	0.964237	0.979422	1.00995	0.930178	0.974109	0.916755	1.00105	0.983324
268313180	acetylglucosaminidase	Thermomonospora curvata DSM 43183	Carbon Cycling	Carbon degradation	Chitin	superkingdom:Bacteria;phylum:Actinobacteria;class:Actinobacteria;order:Actinomycetales;family:Thermomonosporaceae;genus:Thermomonospora;species:Thermomonospora curvata;	1.07485	1.07184	1.09676	1.06745	1.06374	1.07726	1.09075	1.11333	1.16773
224283115	acetylglucosaminidase	Bifidobacterium bifidum NCIMB 41171	Carbon Cycling	Carbon degradation	Chitin	superkingdom:Bacteria;phylum:Actinobacteria;class:Actinobacteria;order:Bifidobacteriales;family:Bifidobacteriaceae;genus:Bifidobacterium;species:Bifidobacterium bifidum;	1.13125	1.12013	1.12723	1.13845	1.10234	1.15385	1.10906	1.08889	1.16196
210160317	acetylglucosaminidase	Collinsella stercoris DSM 13279	Carbon Cycling	Carbon degradation	Chitin	superkingdom:Bacteria;phylum:Actinobacteria;class:Actinobacteria;order:Coriobacteriales;family:Coriobacteriaceae;genus:Collinsella;species:Collinsella stercoris;	1.24004	1.20864	1.23473	1.15532	1.30101	1.10417	1.24039	1.22044	1.21754
210634504	acetylglucosaminidase	Collinsella stercoris DSM 13279	Carbon Cycling	Carbon degradation	Chitin	superkingdom:Bacteria;phylum:Actinobacteria;class:Actinobacteria;order:Coriobacteriales;family:Coriobacteriaceae;genus:Collinsella;species:Collinsella stercoris;	0.946416	0.925189	0.939581	1.01947	0.974937	0.96689	0.960283	1.0284	0.989693
210630992	acetylglucosaminidase	Collinsella stercoris DSM 13279	Carbon Cycling	Carbon degradation	Chitin	superkingdom:Bacteria;phylum:Actinobacteria;class:Actinobacteria;order:Coriobacteriales;family:Coriobacteriaceae;genus:Collinsella;species:Collinsella stercoris;	1.02429	1.00834	1.03565	0.942323	1.06586	1.01623	1.00335	0.797674	1.05919
210634926	acetylglucosaminidase	Collinsella stercoris DSM 13279	Carbon Cycling	Carbon degradation	Chitin	superkingdom:Bacteria;phylum:Actinobacteria;class:Actinobacteria;order:Coriobacteriales;family:Coriobacteriaceae;genus:Collinsella;species:Collinsella stercoris;	0.913177	0.892202	0.822954	0.871131	0.888886	0.956005	0.896156	NA	0.923874
210159723	acetylglucosaminidase	Collinsella stercoris DSM 13279	Carbon Cycling	Carbon degradation	Chitin	superkingdom:Bacteria;phylum:Actinobacteria;class:Actinobacteria;order:Coriobacteriales;family:Coriobacteriaceae;genus:Collinsella;species:Collinsella stercoris;	1.20424	1.194	1.20844	1.2549	1.22993	1.22723	1.20415	1.24753	1.22917
317386638	acetylglucosaminidase	Bacteroides sp. 3_1_40A	Carbon Cycling	Carbon degradation	Chitin	superkingdom:Bacteria;phylum:Bacteroidetes;class:Bacteroidia;order:Bacteroidales;family:Bacteroidaceae;genus:Bacteroides;	NA	NA	NA	0.76213	0.885823	0.811938	0.870572	0.864089	0.824097
260170751	acetylglucosaminidase	Bacteroides sp. D2	Carbon Cycling	Carbon degradation	Chitin	superkingdom:Bacteria;phylum:Bacteroidetes;class:Bacteroidia;order:Bacteroidales;family:Bacteroidaceae;genus:Bacteroides;	0.817811	0.831758	0.77803	0.819507	0.798097	0.833003	NA	0.803187	0.857068
251838824	acetylglucosaminidase	Bacteroides sp. 1_1_6	Carbon Cycling	Carbon degradation	Chitin	superkingdom:Bacteria;phylum:Bacteroidetes;class:Bacteroidia;order:Bacteroidales;family:Bacteroidaceae;genus:Bacteroides;	0.819558	0.798184	0.799408	0.859639	0.86162	0.841572	0.815201	NA	0.836239
262407084	acetylglucosaminidase	Bacteroides sp. 2_1_22	Carbon Cycling	Carbon degradation	Chitin	superkingdom:Bacteria;phylum:Bacteroidetes;class:Bacteroidia;order:Bacteroidales;family:Bacteroidaceae;genus:Bacteroides;	NA	NA	NA	0.776607	0.74307	0.749482	0.768771	NA	0.755289
260175067	acetylglucosaminidase	Bacteroides sp. D2	Carbon Cycling	Carbon degradation	Chitin	superkingdom:Bacteria;phylum:Bacteroidetes;class:Bacteroidia;order:Bacteroidales;family:Bacteroidaceae;genus:Bacteroides;	NA	NA	NA	0.738444	0.740684	0.800138	0.791735	NA	0.804118
251839759	acetylglucosaminidase	Bacteroides sp. 1_1_6	Carbon Cycling	Carbon degradation	Chitin	superkingdom:Bacteria;phylum:Bacteroidetes;class:Bacteroidia;order:Bacteroidales;family:Bacteroidaceae;genus:Bacteroides;	0.868066	0.932764	0.883456	0.86409	0.837095	0.902945	0.843916	0.893469	0.842617
298384189	acetylglucosaminidase	Bacteroides sp. 1_1_14	Carbon Cycling	Carbon degradation	Chitin	superkingdom:Bacteria;phylum:Bacteroidetes;class:Bacteroidia;order:Bacteroidales;family:Bacteroidaceae;genus:Bacteroides;	0.85437	0.856531	0.831147	0.8236	0.780646	0.877385	0.802456	0.854635	0.832252
335947873	acetylglucosaminidase	Bacteroides sp. 1_1_30	Carbon Cycling	Carbon degradation	Chitin	superkingdom:Bacteria;phylum:Bacteroidetes;class:Bacteroidia;order:Bacteroidales;family:Bacteroidaceae;genus:Bacteroides;	1.00459	0.937783	0.980316	0.954904	1.0274	0.983376	0.955199	0.933704	0.960466
255015524	acetylglucosaminidase	Bacteroides sp. 2_1_7	Carbon Cycling	Carbon degradation	Chitin	superkingdom:Bacteria;phylum:Bacteroidetes;class:Bacteroidia;order:Bacteroidales;family:Bacteroidaceae;genus:Bacteroides;	0.972056	0.865087	0.886398	0.832855	0.926563	0.905927	0.998468	0.88825	0.977209
260173517	acetylglucosaminidase	Bacteroides sp. D2	Carbon Cycling	Carbon degradation	Chitin	superkingdom:Bacteria;phylum:Bacteroidetes;class:Bacteroidia;order:Bacteroidales;family:Bacteroidaceae;genus:Bacteroides;	1.24478	1.23397	1.25781	1.32335	1.29055	1.28132	1.28082	1.23622	1.29604
298270032	acetylglucosaminidase	Bacteroides sp. D22	Carbon Cycling	Carbon degradation	Chitin	superkingdom:Bacteria;phylum:Bacteroidetes;class:Bacteroidia;order:Bacteroidales;family:Bacteroidaceae;genus:Bacteroides;	0.875154	0.782633	0.748425	0.747009	0.786129	0.831067	0.829662	0.79494	0.8948
[truncated: 36,786 more rows]

## Sheet: Sir
145352813	Sir	Ostreococcus lucimarinus CCE9901	Sulfur	sulfite reduction	NA	NA	1.01104	1.0087	0.978466	0.983524	0.971762	1.04613	0.986109	0.950337	0.958728
[truncated: 207 more rows]

[truncated: 3 more sheets: nifH , gdh , Sulfur Oxidation]
